# Supplementary material
Source: publisher site journal article supplement (https://www.dovepress.com/article/336729)
Supplement: Supplementary file 1 [file get_supplementary_file.php]

Table S1 Detailed information for all the analyzed genes, including module assignment and connectivity

| datSummary | colorNEW | kTotal | kWithin | kOut | kDiff |
|------------|----------|--------|---------|------|-------|
| TSPAN6     | 4        | 9.9    | 3.6     | 6.3  | -2.7  |
| DPM1       | 1        | 76.8   | 70.3    | 6.4  | 63.9  |
| Clorf112   | 5        | 9.3    | 2.0     | 7.3  | -5.3  |
| CFH        | 0        | 10.6   | 4.7     | 5.9  | -1.2  |
| FUCA2      | 4        | 11.1   | 4.2     | 6.9  | -2.7  |
| GCLC       | 1        | 21.2   | 13.8    | 7.3  | 6.5   |
| NFYA       | 0        | 8.7    | 3.4     | 5.3  | -2.0  |
| NIPAL3     | 0        | 13.3   | 4.9     | 8.4  | -3.6  |
| LAS1L      | 0        | 13.3   | 6.1     | 7.2  | -1.1  |
| ANKIB1     | 1        | 38.8   | 34.8    | 4.0  | 30.8  |
| CYP51A1    | 0        | 9.1    | 2.0     | 7.1  | -5.1  |
| KRIT1      | 1        | 37.7   | 34.3    | 3.4  | 31.0  |
| RAD52      | 1        | 8.5    | 5.0     | 3.4  | 1.6   |
| BAD        | 0        | 18.2   | 6.4     | 11.8 | -5.3  |
| LAP3       | 0        | 6.7    | 2.1     | 4.6  | -2.5  |
| CD99       | 0        | 5.1    | 2.4     | 2.8  | -0.4  |
| MAD1L1     | 0        | 11.9   | 4.8     | 7.2  | -2.4  |
| LASP1      | 3        | 16.1   | 8.4     | 7.8  | 0.6   |
| SNX11      | 2        | 21.4   | 8.6     | 12.9 | -4.3  |
| M6PR       | 1        | 29.1   | 21.6    | 7.5  | 14.1  |
| DBNDD1     | 2        | 19.0   | 7.2     | 11.8 | -4.6  |
| ALS2       | 1        | 19.4   | 14.7    | 4.7  | 10.0  |
| CFLAR      | 3        | 7.3    | 2.3     | 5.1  | -2.8  |
| TFPI       | 0        | 8.0    | 2.6     | 5.4  | -2.8  |
| NDUFAF7    | 1        | 32.4   | 26.2    | 6.2  | 20.0  |
| RBM5       | 1        | 22.9   | 18.5    | 4.4  | 14.0  |
| ARF5       | 2        | 12.9   | 4.4     | 8.6  | -4.2  |
| POLDIP2    | 4        | 20.2   | 6.3     | 13.9 | -7.6  |
| PLXND1     | 0        | 6.3    | 2.7     | 3.6  | -0.9  |
| AK2        | 0        | 10.0   | 4.1     | 5.9  | -1.9  |
| FKBP4      | 0        | 14.2   | 5.5     | 8.7  | -3.2  |
| KDM1A      | 6        | 11.9   | 1.5     | 10.4 | -8.8  |
| RBM6       | 1        | 17.8   | 14.6    | 3.1  | 11.5  |
| RECQL      | 1        | 53.4   | 49.3    | 4.1  | 45.2  |
| VPS50      | 1        | 24.0   | 20.4    | 3.5  | 16.9  |
| ARHGAP33   | 0        | 6.3    | 2.8     | 3.5  | -0.7  |
| NDUFAB1    | 0        | 12.9   | 4.2     | 8.7  | -4.5  |
| SLC25A13   | 0        | 13.5   | 4.2     | 9.2  | -5.0  |
| ST7        | 0        | 6.0    | 2.3     | 3.7  | -1.3  |
| CDC27      | 1        | 75.7   | 68.8    | 6.9  | 61.9  |
| HCCS       | 0        | 7.4    | 3.3     | 4.1  | -0.8  |
| DVL2       | 0        | 9.1    | 4.4     | 4.7  | -0.3  |
| UPF1       | 8        | 17.4   | 3.7     | 13.7 | -10.0 |
| SKAP2      | 0        | 6.9    | 3.2     | 3.7  | -0.5  |
| SLC25A5    | 5        | 11.9   | 2.9     | 8.9  | -6.0  |
| CCDC109B   | 2        | 16.9   | 5.6     | 11.4 | -5.8  |
| POLR2J     | 2        | 27.7   | 13.0    | 14.7 | -1.6  |
| DHX33      | 0        | 17.6   | 6.4     | 11.1 | -4.7  |
| LIG3       | 0        | 7.5    | 2.6     | 4.9  | -2.3  |

|           |    |      |      |      |       |
|-----------|----|------|------|------|-------|
| RPAP3     | 1  | 69.5 | 62.1 | 7.4  | 54.7  |
| AC004381. | 0  | 8.1  | 3.2  | 4.9  | -1.7  |
| CIAPIN1   | 6  | 15.3 | 4.5  | 10.8 | -6.3  |
| SPPL2B    | 8  | 17.5 | 4.7  | 12.8 | -8.2  |
| FAM214B   | 3  | 15.1 | 4.8  | 10.2 | -5.4  |
| MSL3      | 1  | 11.0 | 5.8  | 5.2  | 0.6   |
| CREBBP    | 0  | 11.2 | 5.1  | 6.1  | -0.9  |
| GCFC2     | 1  | 22.3 | 14.8 | 7.6  | 7.2   |
| WDR54     | 3  | 13.3 | 5.0  | 8.3  | -3.3  |
| CROT      | 0  | 7.3  | 2.0  | 5.4  | -3.4  |
| KMT2E     | 1  | 32.3 | 29.0 | 3.2  | 25.8  |
| RHBDD2    | 0  | 8.7  | 4.2  | 4.5  | -0.3  |
| IBTK      | 1  | 39.1 | 35.1 | 4.0  | 31.1  |
| ZNF195    | 1  | 14.8 | 11.3 | 3.5  | 7.7   |
| MYCBP2    | 1  | 18.2 | 15.6 | 2.6  | 13.0  |
| FBXL3     | 1  | 13.0 | 9.8  | 3.2  | 6.6   |
| PK2       | 0  | 7.3  | 3.2  | 4.2  | -1.0  |
| ITGA3     | 3  | 33.9 | 25.7 | 8.2  | 17.5  |
| ZFX       | 1  | 19.0 | 15.6 | 3.4  | 12.1  |
| LAMP2     | 3  | 11.4 | 3.4  | 8.0  | -4.6  |
| GDE1      | 0  | 6.6  | 1.8  | 4.8  | -2.9  |
| C19orf60  | 2  | 23.4 | 10.9 | 12.5 | -1.7  |
| CRLF1     | 0  | 10.6 | 5.1  | 5.6  | -0.5  |
| TMEM98    | 0  | 7.5  | 3.0  | 4.4  | -1.4  |
| MAP3K14   | 3  | 14.9 | 4.6  | 10.3 | -5.7  |
| TMEM132A  | 0  | 8.4  | 3.3  | 5.0  | -1.7  |
| AP2B1     | 3  | 13.5 | 4.5  | 9.0  | -4.5  |
| ZNF263    | 12 | 17.0 | 2.9  | 14.2 | -11.3 |
| SPATA20   | 0  | 11.4 | 4.7  | 6.7  | -2.0  |
| TNFRSF12A | 3  | 16.2 | 9.6  | 6.6  | 3.1   |
| RALA      | 1  | 17.8 | 13.0 | 4.8  | 8.2   |
| BAIAP2L1  | 4  | 19.4 | 7.7  | 11.7 | -4.0  |
| ETV1      | 0  | 7.4  | 3.1  | 4.3  | -1.2  |
| AGK       | 6  | 10.9 | 1.6  | 9.3  | -7.7  |
| ALDH3B1   | 3  | 16.0 | 8.0  | 8.0  | 0.0   |
| PHTF2     | 1  | 19.6 | 15.2 | 4.4  | 10.8  |
| FARP2     | 1  | 13.2 | 6.2  | 6.9  | -0.7  |
| GGCT      | 1  | 25.0 | 17.0 | 8.0  | 9.0   |
| DBF4      | 7  | 43.5 | 7.4  | 36.1 | -28.6 |
| IFRD1     | 1  | 25.7 | 22.3 | 3.4  | 18.9  |
| COX10     | 2  | 15.3 | 5.7  | 9.6  | -3.8  |
| GTF2IRD1  | 0  | 6.8  | 3.0  | 3.8  | -0.8  |
| PAF1      | 0  | 8.0  | 3.8  | 4.2  | -0.4  |
| VPS41     | 1  | 25.0 | 21.0 | 4.0  | 17.0  |
| ELAC2     | 0  | 11.2 | 4.2  | 6.9  | -2.7  |
| ARSD      | 0  | 12.7 | 5.0  | 7.7  | -2.7  |
| PNPLA4    | 0  | 4.7  | 2.0  | 2.7  | -0.7  |
| ADIPOR2   | 0  | 9.5  | 3.8  | 5.7  | -1.9  |
| MARK4     | 0  | 7.4  | 4.3  | 3.1  | 1.2   |
| CCDC124   | 8  | 24.1 | 6.6  | 17.5 | -10.8 |
| PAFAH1B1  | 1  | 32.4 | 26.7 | 5.6  | 21.1  |
| KIAA0100  | 0  | 6.9  | 2.5  | 4.4  | -1.9  |
| TRAPPC6A  | 0  | 9.4  | 3.8  | 5.6  | -1.8  |
| ST7L      | 0  | 9.2  | 2.8  | 6.3  | -3.5  |

|          |    |      |      |      |       |
|----------|----|------|------|------|-------|
| RPUSD1   | 12 | 26.1 | 4.7  | 21.5 | -16.8 |
| RHBDF1   | 0  | 9.9  | 5.1  | 4.8  | 0.3   |
| LUC7L    | 0  | 7.8  | 2.9  | 4.9  | -2.1  |
| TSR3     | 12 | 19.5 | 3.5  | 16.0 | -12.5 |
| PIGQ     | 0  | 11.8 | 4.6  | 7.2  | -2.6  |
| CRAMP1   | 0  | 9.1  | 4.3  | 4.9  | -0.6  |
| TEAD3    | 11 | 18.9 | 1.4  | 17.5 | -16.1 |
| DNAJC11  | 0  | 11.4 | 4.6  | 6.8  | -2.2  |
| MYLIP    | 0  | 6.0  | 2.9  | 3.1  | -0.2  |
| PSMB1    | 0  | 7.1  | 2.7  | 4.4  | -1.7  |
| JARID2   | 0  | 11.2 | 5.7  | 5.6  | 0.1   |
| CDK11A   | 0  | 6.1  | 2.0  | 4.1  | -2.1  |
| NADK     | 0  | 9.3  | 3.6  | 5.7  | -2.1  |
| CYTH3    | 3  | 12.2 | 5.0  | 7.2  | -2.2  |
| SYPL1    | 1  | 26.4 | 22.4 | 4.1  | 18.3  |
| CYB561   | 0  | 14.9 | 5.5  | 9.3  | -3.8  |
| SPAG9    | 1  | 85.3 | 77.6 | 7.7  | 69.9  |
| SS18L2   | 0  | 11.5 | 4.1  | 7.4  | -3.3  |
| MPND     | 8  | 16.0 | 2.6  | 13.4 | -10.8 |
| MGST1    | 0  | 8.6  | 4.2  | 4.3  | -0.1  |
| CRY1     | 7  | 14.1 | 2.2  | 11.8 | -9.6  |
| NFIX     | 3  | 14.0 | 5.7  | 8.3  | -2.6  |
| ST3GAL1  | 3  | 16.4 | 4.3  | 12.1 | -7.9  |
| IL32     | 0  | 9.3  | 3.7  | 5.6  | -1.9  |
| PKD1     | 0  | 8.5  | 3.7  | 4.7  | -1.0  |
| MED24    | 0  | 9.8  | 3.9  | 5.9  | -2.0  |
| RHOBTB2  | 0  | 10.9 | 5.1  | 5.8  | -0.7  |
| HEATR5B  | 1  | 13.0 | 9.9  | 3.2  | 6.7   |
| SEC62    | 1  | 83.5 | 80.0 | 3.5  | 76.4  |
| RPS20    | 0  | 7.3  | 2.3  | 5.0  | -2.8  |
| CSDE1    | 1  | 88.6 | 84.1 | 4.5  | 79.7  |
| UBE3C    | 1  | 7.0  | 3.5  | 3.5  | 0.1   |
| REV3L    | 1  | 49.5 | 38.9 | 10.5 | 28.4  |
| POMT2    | 6  | 16.7 | 5.8  | 10.9 | -5.1  |
| VTA1     | 1  | 36.7 | 31.3 | 5.3  | 26.0  |
| BAZ1B    | 1  | 22.2 | 17.6 | 4.6  | 13.0  |
| RANBP9   | 1  | 16.2 | 11.3 | 4.9  | 6.4   |
| SPRTN    | 1  | 8.1  | 5.3  | 2.9  | 2.4   |
| METTL13  | 9  | 10.7 | 1.9  | 8.9  | -7.0  |
| DYRK4    | 0  | 7.0  | 2.8  | 4.2  | -1.4  |
| ZNF207   | 1  | 33.2 | 28.8 | 4.4  | 24.4  |
| UQCRC1   | 0  | 9.4  | 5.0  | 4.4  | 0.6   |
| STARD3NL | 0  | 5.0  | 2.4  | 2.7  | -0.3  |
| CD9      | 3  | 8.6  | 2.9  | 5.7  | -2.8  |
| NCAPD2   | 5  | 15.9 | 5.8  | 10.2 | -4.4  |
| IFFO1    | 0  | 10.3 | 4.5  | 5.8  | -1.3  |
| PHF7     | 0  | 7.0  | 3.6  | 3.4  | 0.2   |
| NISCH    | 0  | 12.2 | 6.3  | 6.0  | 0.3   |
| FUZ      | 0  | 6.2  | 3.2  | 3.0  | 0.3   |
| IDS      | 3  | 14.7 | 7.7  | 7.1  | 0.6   |
| ZNF200   | 0  | 8.0  | 2.8  | 5.2  | -2.4  |
| LRRC23   | 0  | 8.8  | 4.7  | 4.2  | 0.5   |
| HFE      | 0  | 11.3 | 5.2  | 6.2  | -1.0  |
| SCMH1    | 0  | 6.0  | 2.8  | 3.2  | -0.4  |

|           |    |      |      |      |       |
|-----------|----|------|------|------|-------|
| FYN       | 0  | 7.7  | 2.4  | 5.3  | -2.9  |
| TCEB3     | 0  | 9.8  | 4.5  | 5.3  | -0.8  |
| LYPLA2    | 2  | 16.4 | 5.1  | 11.3 | -6.2  |
| CLCN6     | 0  | 9.2  | 4.7  | 4.5  | 0.2   |
| MRC2      | 3  | 14.9 | 5.9  | 8.9  | -3.0  |
| NME1-NME2 | 6  | 41.2 | 19.1 | 22.1 | -3.0  |
| TSPAN9    | 0  | 11.5 | 5.4  | 6.1  | -0.8  |
| BTBD7     | 1  | 17.3 | 12.5 | 4.9  | 7.6   |
| APBA3     | 8  | 23.8 | 8.5  | 15.3 | -6.9  |
| MKS1      | 2  | 13.1 | 4.3  | 8.8  | -4.5  |
| ABHD5     | 0  | 7.5  | 2.9  | 4.6  | -1.8  |
| AKAP8L    | 8  | 9.2  | 1.7  | 7.5  | -5.9  |
| UTP18     | 5  | 18.7 | 3.2  | 15.5 | -12.3 |
| RNF216    | 0  | 9.2  | 4.3  | 4.9  | -0.6  |
| TTC19     | 0  | 8.0  | 3.4  | 4.6  | -1.2  |
| PTBP1     | 0  | 15.0 | 6.0  | 9.1  | -3.1  |
| LARS2     | 0  | 16.2 | 6.5  | 9.7  | -3.2  |
| PIK3C2A   | 1  | 38.2 | 34.2 | 4.0  | 30.2  |
| PLAUR     | 3  | 20.6 | 12.7 | 7.9  | 4.8   |
| ANLN      | 5  | 56.2 | 6.0  | 50.2 | -44.2 |
| WIZ       | 8  | 28.3 | 6.5  | 21.7 | -15.2 |
| RABGAP1   | 1  | 20.7 | 16.3 | 4.3  | 12.0  |
| QPCTL     | 0  | 11.3 | 4.9  | 6.4  | -1.4  |
| PPP5C     | 0  | 8.9  | 4.5  | 4.4  | 0.0   |
| MAP4K3    | 1  | 32.1 | 28.7 | 3.4  | 25.3  |
| TMEM159   | 3  | 13.4 | 5.4  | 8.0  | -2.7  |
| BRCA1     | 7  | 34.9 | 5.9  | 29.0 | -23.2 |
| ERCC1     | 0  | 9.0  | 4.2  | 4.7  | -0.5  |
| SEMA3B    | 4  | 8.5  | 2.6  | 6.0  | -3.4  |
| MBTPS2    | 1  | 12.8 | 9.4  | 3.4  | 6.0   |
| PRICKLE3  | 2  | 14.4 | 4.3  | 10.1 | -5.8  |
| EXTL3     | 0  | 10.2 | 5.6  | 4.6  | 0.9   |
| ELOVL5    | 1  | 16.8 | 13.5 | 3.2  | 10.3  |
| CALCOO1   | 0  | 12.5 | 6.6  | 5.9  | 0.6   |
| UBR7      | 7  | 10.7 | 1.2  | 9.5  | -8.3  |
| MAP4K5    | 1  | 33.6 | 30.1 | 3.5  | 26.5  |
| PSMC4     | 0  | 8.3  | 3.8  | 4.5  | -0.7  |
| MAN2B2    | 0  | 10.2 | 4.8  | 5.3  | -0.5  |
| SLC25A39  | 2  | 19.7 | 5.0  | 14.8 | -9.8  |
| MVP       | 3  | 21.7 | 12.6 | 9.1  | 3.6   |
| NUB1      | 1  | 14.4 | 11.1 | 3.3  | 7.8   |
| PGM3      | 1  | 46.0 | 40.3 | 5.7  | 34.7  |
| CLK1      | 1  | 47.7 | 43.2 | 4.6  | 38.6  |
| POLR3B    | 0  | 14.9 | 5.1  | 9.9  | -4.8  |
| ANGEL1    | 2  | 25.4 | 10.7 | 14.7 | -4.0  |
| RNF14     | 0  | 8.6  | 2.2  | 6.4  | -4.2  |
| DNASE1L1  | 0  | 7.7  | 4.0  | 3.7  | 0.3   |
| DDX11     | 5  | 13.1 | 5.0  | 8.2  | -3.2  |
| HEBP1     | 0  | 7.4  | 2.9  | 4.5  | -1.6  |
| GPRC5A    | 3  | 10.3 | 4.2  | 6.1  | -1.8  |
| TACC3     | 5  | 25.0 | 15.2 | 9.8  | 5.4   |
| UFL1      | 1  | 26.6 | 23.6 | 3.0  | 20.6  |
| POLA2     | 5  | 20.1 | 9.2  | 10.9 | -1.7  |
| ZC3H3     | 13 | 32.5 | 4.1  | 28.4 | -24.3 |

|          |   |      |      |      |       |
|----------|---|------|------|------|-------|
| CAPN1    | 0 | 12.8 | 4.6  | 8.2  | -3.6  |
| MDH1     | 1 | 49.7 | 41.8 | 7.9  | 34.0  |
| SLC30A9  | 1 | 36.2 | 32.1 | 4.1  | 28.0  |
| MTMR11   | 9 | 7.9  | 1.3  | 6.6  | -5.3  |
| COX15    | 0 | 8.2  | 3.7  | 4.6  | -0.9  |
| YAF2     | 1 | 11.1 | 7.7  | 3.4  | 4.3   |
| ZMYND11  | 1 | 27.2 | 23.9 | 3.4  | 20.5  |
| BID      | 0 | 7.3  | 2.8  | 4.5  | -1.7  |
| XYLT2    | 0 | 5.7  | 2.9  | 2.8  | 0.1   |
| NUDCD3   | 3 | 14.3 | 4.3  | 10.0 | -5.7  |
| GLT8D1   | 1 | 13.7 | 10.4 | 3.2  | 7.2   |
| ATP2C1   | 1 | 43.7 | 38.3 | 5.4  | 32.9  |
| RALBP1   | 0 | 6.4  | 2.4  | 4.0  | -1.6  |
| RUFY3    | 1 | 14.6 | 10.3 | 4.3  | 6.0   |
| WWTR1    | 3 | 14.7 | 7.9  | 6.8  | 1.1   |
| AGPS     | 1 | 27.6 | 24.0 | 3.6  | 20.4  |
| CXorf56  | 0 | 10.1 | 5.0  | 5.1  | -0.1  |
| TTC27    | 0 | 12.9 | 3.7  | 9.2  | -5.6  |
| PHLDB1   | 3 | 14.8 | 7.3  | 7.5  | -0.2  |
| CD74     | 0 | 6.1  | 2.9  | 3.2  | -0.3  |
| ZRANB1   | 1 | 15.2 | 9.3  | 5.8  | 3.5   |
| NCDN     | 2 | 21.3 | 7.5  | 13.8 | -6.4  |
| ZFP64    | 0 | 10.3 | 4.7  | 5.6  | -0.9  |
| MNAT1    | 1 | 22.6 | 18.9 | 3.7  | 15.2  |
| SAMD4A   | 0 | 8.2  | 2.2  | 6.0  | -3.7  |
| MRE11A   | 1 | 26.9 | 20.4 | 6.5  | 13.8  |
| SERPINB1 | 4 | 12.4 | 4.1  | 8.4  | -4.3  |
| SPAST    | 1 | 25.7 | 21.8 | 3.9  | 17.9  |
| AQR      | 1 | 35.9 | 29.2 | 6.7  | 22.4  |
| FHL1     | 3 | 8.5  | 2.4  | 6.1  | -3.7  |
| RTFDC1   | 6 | 10.1 | 1.6  | 8.5  | -6.9  |
| RNF10    | 6 | 23.5 | 9.5  | 14.0 | -4.5  |
| ZDHHC6   | 1 | 15.9 | 11.1 | 4.9  | 6.2   |
| RNH1     | 0 | 14.1 | 4.8  | 9.3  | -4.5  |
| NDUFS1   | 1 | 17.7 | 13.8 | 3.9  | 9.9   |
| RB1CC1   | 1 | 31.6 | 27.9 | 3.7  | 24.2  |
| ERP44    | 0 | 10.5 | 4.5  | 5.9  | -1.4  |
| ALAS1    | 4 | 17.9 | 4.1  | 13.7 | -9.6  |
| BIRC3    | 0 | 7.7  | 2.1  | 5.7  | -3.6  |
| GLRX2    | 0 | 8.6  | 3.3  | 5.2  | -1.9  |
| SNAPC1   | 0 | 11.6 | 2.1  | 9.5  | -7.4  |
| DERA     | 7 | 8.5  | 0.7  | 7.7  | -7.0  |
| STRAP    | 1 | 47.6 | 43.0 | 4.6  | 38.3  |
| ABCC2    | 4 | 17.4 | 9.0  | 8.4  | 0.6   |
| PLEKH01  | 3 | 8.0  | 2.7  | 5.3  | -2.6  |
| GCLM     | 1 | 13.7 | 7.2  | 6.4  | 0.8   |
| UBR2     | 1 | 14.4 | 11.7 | 2.7  | 9.0   |
| EHD2     | 3 | 18.3 | 12.0 | 6.4  | 5.6   |
| DEPDC1   | 7 | 47.9 | 9.8  | 38.1 | -28.4 |
| CCDC28A  | 0 | 7.5  | 3.0  | 4.5  | -1.5  |
| RRAGD    | 0 | 8.2  | 3.9  | 4.4  | -0.5  |
| HSF2     | 6 | 23.9 | 3.3  | 20.6 | -17.3 |
| PHF20    | 1 | 16.0 | 8.5  | 7.4  | 1.1   |
| NR1H3    | 4 | 22.7 | 10.8 | 11.9 | -1.1  |

|           |    |       |      |      |       |
|-----------|----|-------|------|------|-------|
| TYMP      | 0  | 15.6  | 6.4  | 9.2  | -2.9  |
| NCAPH2    | 5  | 17.3  | 5.0  | 12.3 | -7.2  |
| TOMM34    | 10 | 15.8  | 1.1  | 14.7 | -13.6 |
| SEC63     | 1  | 89.3  | 77.3 | 12.0 | 65.3  |
| KPNA6     | 0  | 8.3   | 4.1  | 4.2  | -0.1  |
| VIM       | 0  | 6.4   | 2.8  | 3.5  | -0.7  |
| RNASET2   | 0  | 8.2   | 3.3  | 4.9  | -1.5  |
| CD44      | 3  | 18.5  | 12.4 | 6.1  | 6.3   |
| BTN3A1    | 3  | 12.0  | 3.7  | 8.3  | -4.6  |
| MIPEP     | 0  | 11.1  | 4.1  | 7.0  | -2.9  |
| IFNGR1    | 1  | 12.3  | 7.7  | 4.6  | 3.2   |
| B4GALT7   | 11 | 16.9  | 1.3  | 15.6 | -14.4 |
| VRK2      | 1  | 21.0  | 17.5 | 3.5  | 14.0  |
| VEZT      | 1  | 36.3  | 32.8 | 3.5  | 29.2  |
| BRD9      | 0  | 7.9   | 3.5  | 4.5  | -1.0  |
| SNX1      | 1  | 10.3  | 6.9  | 3.4  | 3.5   |
| TBPL1     | 1  | 30.9  | 24.5 | 6.4  | 18.1  |
| ARNTL2    | 7  | 14.4  | 1.5  | 12.9 | -11.5 |
| BCLAF1    | 1  | 104.4 | 98.9 | 5.5  | 93.4  |
| SLC39A9   | 0  | 10.1  | 4.8  | 5.4  | -0.6  |
| TFB1M     | 0  | 10.5  | 3.9  | 6.6  | -2.7  |
| RABEP1    | 1  | 34.5  | 28.7 | 5.8  | 22.9  |
| HMGB3     | 7  | 15.2  | 1.5  | 13.7 | -12.3 |
| NUP160    | 1  | 27.7  | 20.6 | 7.1  | 13.5  |
| BAK1      | 11 | 19.7  | 1.6  | 18.0 | -16.4 |
| GRN       | 3  | 13.4  | 4.2  | 9.2  | -5.0  |
| FAM13B    | 1  | 14.9  | 11.7 | 3.3  | 8.4   |
| CENPQ     | 7  | 22.1  | 3.4  | 18.8 | -15.4 |
| SARS      | 0  | 6.0   | 2.5  | 3.4  | -0.9  |
| RANBP3    | 6  | 12.8  | 1.9  | 11.0 | -9.1  |
| TSSC1     | 2  | 21.3  | 8.1  | 13.2 | -5.1  |
| PNPLA6    | 8  | 11.9  | 2.1  | 9.7  | -7.6  |
| IFT88     | 1  | 9.7   | 6.6  | 3.1  | 3.6   |
| ALG1      | 12 | 20.1  | 2.6  | 17.5 | -14.9 |
| ZCCHC8    | 1  | 21.3  | 16.7 | 4.6  | 12.1  |
| ABCF2     | 0  | 9.9   | 4.2  | 5.7  | -1.4  |
| CHPF2     | 0  | 15.4  | 7.2  | 8.2  | -1.0  |
| FUT8      | 3  | 13.7  | 7.1  | 6.6  | 0.4   |
| UBA6      | 1  | 46.9  | 42.0 | 4.9  | 37.1  |
| ATP6VOA1  | 4  | 8.1   | 2.5  | 5.5  | -3.0  |
| PIAS1     | 1  | 15.7  | 11.9 | 3.8  | 8.1   |
| SLC4A7    | 1  | 18.9  | 13.4 | 5.5  | 7.9   |
| MAP2K3    | 2  | 15.6  | 6.4  | 9.2  | -2.8  |
| TMSB10    | 3  | 20.7  | 12.6 | 8.0  | 4.6   |
| RNF19A    | 1  | 13.7  | 10.5 | 3.2  | 7.2   |
| PEX3      | 6  | 39.0  | 5.3  | 33.8 | -28.5 |
| GABARAPL2 | 0  | 11.3  | 5.9  | 5.4  | 0.6   |
| FAM136A   | 0  | 16.7  | 5.3  | 11.4 | -6.1  |
| VCL       | 3  | 22.1  | 13.8 | 8.3  | 5.6   |
| DEPDC1B   | 7  | 10.3  | 1.0  | 9.3  | -8.3  |
| NSMAF     | 1  | 16.1  | 10.7 | 5.4  | 5.3   |
| ADSS      | 1  | 19.7  | 16.0 | 3.7  | 12.3  |
| TIMP2     | 3  | 29.0  | 21.1 | 7.9  | 13.2  |
| RFC1      | 1  | 82.8  | 73.3 | 9.5  | 63.7  |

|         |    |       |       |      |       |
|---------|----|-------|-------|------|-------|
| TBC1D23 | 1  | 21.0  | 18.4  | 2.7  | 15.7  |
| CUL3    | 1  | 91.9  | 85.4  | 6.5  | 78.9  |
| ZZZ3    | 1  | 33.9  | 30.6  | 3.4  | 27.2  |
| TUBG2   | 11 | 11.8  | 0.9   | 10.9 | -9.9  |
| RPL26L1 | 7  | 15.2  | 1.8   | 13.4 | -11.7 |
| NSUN2   | 0  | 11.1  | 3.3   | 7.8  | -4.5  |
| FBXO42  | 2  | 17.9  | 6.4   | 11.5 | -5.1  |
| MFAP3   | 1  | 25.6  | 21.3  | 4.2  | 17.1  |
| MRI1    | 2  | 20.1  | 7.4   | 12.7 | -5.4  |
| METTL1  | 6  | 14.7  | 3.1   | 11.6 | -8.5  |
| AGA     | 0  | 4.7   | 1.6   | 3.1  | -1.5  |
| PI4K2B  | 1  | 9.6   | 5.5   | 4.1  | 1.4   |
| BOD1L1  | 1  | 29.1  | 24.7  | 4.4  | 20.3  |
| MAT2B   | 1  | 15.0  | 11.8  | 3.3  | 8.5   |
| EDC4    | 0  | 14.0  | 6.3   | 7.7  | -1.3  |
| TRIO    | 3  | 24.2  | 8.7   | 15.5 | -6.7  |
| VCAN    | 0  | 11.8  | 2.5   | 9.3  | -6.8  |
| CLEC16A | 0  | 8.3   | 3.4   | 4.9  | -1.5  |
| CDH1    | 4  | 9.7   | 4.0   | 5.6  | -1.6  |
| SKIV2L2 | 1  | 107.5 | 100.3 | 7.3  | 93.0  |
| ZFYVE16 | 1  | 52.7  | 47.3  | 5.4  | 41.9  |
| FAM65A  | 0  | 10.7  | 4.8   | 5.8  | -1.0  |
| RAI14   | 1  | 31.4  | 26.1  | 5.3  | 20.8  |
| PNKP    | 0  | 14.1  | 6.9   | 7.2  | -0.3  |
| SPDL1   | 7  | 66.0  | 7.2   | 58.7 | -51.5 |
| STAU2   | 1  | 14.2  | 11.6  | 2.7  | 8.9   |
| PQLC2   | 11 | 18.0  | 1.2   | 16.8 | -15.7 |
| CTNS    | 0  | 13.8  | 5.7   | 8.1  | -2.3  |
| PHF23   | 0  | 9.2   | 4.5   | 4.7  | -0.2  |
| INPP4A  | 0  | 8.0   | 3.7   | 4.3  | -0.6  |
| PSMA4   | 1  | 33.7  | 30.0  | 3.6  | 26.4  |
| LSG1    | 0  | 8.1   | 2.4   | 5.7  | -3.3  |
| PARP3   | 3  | 11.4  | 3.4   | 8.0  | -4.6  |
| TNC     | 3  | 24.5  | 17.1  | 7.4  | 9.7   |
| THAP3   | 2  | 22.3  | 10.0  | 12.4 | -2.4  |
| TDP1    | 0  | 13.2  | 5.1   | 8.1  | -3.0  |
| AIFM2   | 0  | 8.9   | 3.5   | 5.4  | -1.9  |
| MED17   | 1  | 22.4  | 16.5  | 5.9  | 10.5  |
| RETSAT  | 0  | 11.8  | 3.8   | 8.0  | -4.1  |
| CAPG    | 0  | 5.8   | 2.5   | 3.3  | -0.9  |
| AP2S1   | 3  | 12.7  | 5.6   | 7.1  | -1.4  |
| DCUN1D1 | 1  | 50.4  | 44.9  | 5.5  | 39.5  |
| JADE2   | 0  | 16.4  | 5.9   | 10.5 | -4.6  |
| TRIT1   | 6  | 22.4  | 3.7   | 18.7 | -15.0 |
| CUL7    | 0  | 13.0  | 7.4   | 5.6  | 1.8   |
| CTNNA1  | 1  | 13.0  | 8.7   | 4.3  | 4.4   |
| PHKA2   | 4  | 9.1   | 3.5   | 5.5  | -2.0  |
| HSPA5   | 1  | 9.6   | 6.2   | 3.4  | 2.7   |
| DSG2    | 0  | 7.0   | 2.3   | 4.7  | -2.4  |
| GEMIN8  | 0  | 9.5   | 4.8   | 4.6  | 0.2   |
| OFD1    | 1  | 23.0  | 18.7  | 4.3  | 14.3  |
| WDR37   | 0  | 15.5  | 6.8   | 8.8  | -2.0  |
| YTHDC2  | 1  | 26.4  | 23.0  | 3.4  | 19.6  |
| CTPS2   | 1  | 8.7   | 4.8   | 3.9  | 1.0   |

|          |    |      |      |      |       |
|----------|----|------|------|------|-------|
| ATP6V1H  | 1  | 9.1  | 4.7  | 4.4  | 0.3   |
| POLR2B   | 1  | 78.1 | 73.5 | 4.5  | 69.0  |
| FAM214A  | 1  | 10.9 | 6.6  | 4.3  | 2.3   |
| TPR      | 1  | 91.3 | 82.8 | 8.5  | 74.2  |
| CP       | 4  | 10.9 | 3.6  | 7.3  | -3.7  |
| KIAA0556 | 11 | 13.4 | 1.0  | 12.4 | -11.4 |
| DTNBP1   | 0  | 5.1  | 2.1  | 3.0  | -0.9  |
| C12orf4  | 1  | 18.9 | 14.6 | 4.3  | 10.4  |
| SCML1    | 1  | 9.3  | 5.3  | 4.1  | 1.2   |
| WWC3     | 0  | 6.1  | 2.6  | 3.6  | -1.0  |
| MAP4     | 3  | 25.0 | 16.5 | 8.5  | 8.0   |
| GOPC     | 1  | 33.3 | 28.4 | 4.9  | 23.5  |
| USP28    | 1  | 16.0 | 11.2 | 4.8  | 6.4   |
| HDAC9    | 0  | 6.8  | 1.8  | 5.0  | -3.2  |
| TSPAN17  | 3  | 16.8 | 5.9  | 11.0 | -5.1  |
| NOP16    | 0  | 19.8 | 7.7  | 12.1 | -4.4  |
| CC2D2A   | 0  | 8.0  | 4.0  | 4.0  | -0.1  |
| RRM2B    | 1  | 28.8 | 25.7 | 3.1  | 22.7  |
| ZNF800   | 1  | 12.0 | 9.7  | 2.3  | 7.3   |
| MRPS10   | 1  | 10.8 | 6.0  | 4.8  | 1.3   |
| RSF1     | 1  | 26.3 | 23.1 | 3.2  | 19.8  |
| VPS13D   | 0  | 6.5  | 1.8  | 4.6  | -2.8  |
| FAM120A  | 0  | 7.3  | 2.6  | 4.7  | -2.1  |
| R3HDM1   | 1  | 16.9 | 13.3 | 3.6  | 9.8   |
| KITLG    | 1  | 7.2  | 4.7  | 2.5  | 2.2   |
| ERCC8    | 1  | 14.7 | 8.4  | 6.3  | 2.2   |
| H6PD     | 0  | 17.3 | 7.5  | 9.8  | -2.4  |
| VAMP3    | 3  | 9.8  | 2.9  | 6.9  | -4.0  |
| LTBP1    | 3  | 10.7 | 3.7  | 7.0  | -3.3  |
| RCN1     | 1  | 10.4 | 7.3  | 3.1  | 4.2   |
| RFC2     | 5  | 19.0 | 9.1  | 9.9  | -0.9  |
| ARID1B   | 0  | 8.9  | 3.6  | 5.3  | -1.6  |
| CLPTM1L  | 0  | 5.4  | 2.3  | 3.1  | -0.8  |
| NEDD4L   | 0  | 7.3  | 2.9  | 4.3  | -1.4  |
| HEXB     | 1  | 9.4  | 4.9  | 4.5  | 0.4   |
| PTCD2    | 1  | 12.6 | 7.6  | 5.0  | 2.6   |
| JKAMP    | 1  | 58.7 | 55.5 | 3.2  | 52.2  |
| DKK3     | 0  | 7.5  | 3.0  | 4.6  | -1.6  |
| NFE2L3   | 1  | 13.1 | 5.8  | 7.3  | -1.5  |
| MCUR1    | 6  | 25.9 | 6.7  | 19.3 | -12.6 |
| LIMA1    | 1  | 8.5  | 5.8  | 2.7  | 3.1   |
| LETMD1   | 0  | 9.1  | 3.9  | 5.3  | -1.4  |
| MAPK9    | 1  | 12.9 | 7.3  | 5.6  | 1.7   |
| BCAR1    | 3  | 17.9 | 6.8  | 11.2 | -4.4  |
| FAM160A2 | 2  | 16.1 | 4.7  | 11.4 | -6.7  |
| HERPUD1  | 0  | 9.1  | 3.9  | 5.2  | -1.3  |
| HOMER3   | 3  | 21.9 | 10.4 | 11.4 | -1.0  |
| RAD51    | 5  | 14.0 | 4.3  | 9.6  | -5.3  |
| PIK3CB   | 1  | 10.0 | 5.0  | 4.9  | 0.1   |
| CYBA     | 0  | 6.8  | 2.8  | 4.0  | -1.2  |
| THOC3    | 0  | 11.6 | 4.2  | 7.4  | -3.3  |
| HEBP2    | 0  | 6.8  | 2.9  | 3.9  | -1.1  |
| MPHOSPH9 | 1  | 48.5 | 41.8 | 6.8  | 35.0  |
| PLEKHA5  | 1  | 16.8 | 13.7 | 3.1  | 10.6  |



|          |    |       |      |      |       |
|----------|----|-------|------|------|-------|
| SIKE1    | 6  | 20.0  | 2.8  | 17.1 | -14.3 |
| RRP12    | 0  | 15.1  | 6.5  | 8.6  | -2.1  |
| FNIP2    | 0  | 10.1  | 2.4  | 7.7  | -5.4  |
| MSM01    | 1  | 7.5   | 4.1  | 3.4  | 0.7   |
| TTC17    | 1  | 18.4  | 15.7 | 2.6  | 13.1  |
| FOXN3    | 0  | 8.1   | 3.7  | 4.3  | -0.6  |
| AKR7A2   | 2  | 21.2  | 9.3  | 11.8 | -2.5  |
| MRT04    | 0  | 16.3  | 7.4  | 9.0  | -1.6  |
| USE1     | 2  | 12.8  | 3.5  | 9.3  | -5.8  |
| LAMA3    | 3  | 7.2   | 2.2  | 5.0  | -2.8  |
| AP5M1    | 1  | 37.7  | 32.9 | 4.8  | 28.1  |
| ANAPC4   | 1  | 30.5  | 24.9 | 5.6  | 19.3  |
| TRAPPC3  | 0  | 10.3  | 4.8  | 5.5  | -0.7  |
| THRAP3   | 1  | 34.2  | 30.5 | 3.7  | 26.8  |
| PHPT1    | 10 | 15.7  | 4.2  | 11.5 | -7.3  |
| ARID4B   | 1  | 27.2  | 24.3 | 2.9  | 21.5  |
| OPN3     | 0  | 7.3   | 2.8  | 4.6  | -1.8  |
| SDCCAG8  | 1  | 10.0  | 7.0  | 3.0  | 4.0   |
| KIF1B    | 1  | 11.5  | 7.0  | 4.5  | 2.4   |
| TBC1D22A | 2  | 23.7  | 9.2  | 14.5 | -5.4  |
| SYNE2    | 1  | 12.9  | 9.2  | 3.6  | 5.6   |
| ATP9A    | 0  | 7.9   | 4.0  | 3.9  | 0.0   |
| FAM168A  | 0  | 15.2  | 7.7  | 7.5  | 0.2   |
| NOP58    | 1  | 106.8 | 98.9 | 8.0  | 90.9  |
| SZRD1    | 0  | 16.9  | 7.1  | 9.9  | -2.8  |
| CUL1     | 1  | 25.0  | 22.2 | 2.7  | 19.5  |
| FAM114A2 | 1  | 10.4  | 7.1  | 3.3  | 3.8   |
| CYFIP2   | 0  | 7.1   | 2.8  | 4.3  | -1.5  |
| TAB2     | 1  | 28.3  | 21.3 | 7.0  | 14.3  |
| GINM1    | 0  | 10.8  | 2.4  | 8.4  | -5.9  |
| EIF2AK2  | 1  | 16.0  | 12.0 | 4.0  | 8.0   |
| USP36    | 0  | 8.4   | 3.8  | 4.6  | -0.8  |
| KMT2C    | 1  | 14.8  | 11.6 | 3.2  | 8.4   |
| PUM2     | 1  | 63.1  | 59.0 | 4.1  | 54.9  |
| MRPL43   | 2  | 20.9  | 8.1  | 12.8 | -4.7  |
| C4orf27  | 1  | 12.7  | 8.0  | 4.7  | 3.4   |
| ZFR      | 1  | 61.0  | 57.1 | 3.9  | 53.2  |
| RC3H2    | 1  | 14.3  | 9.5  | 4.8  | 4.8   |
| IL17RB   | 4  | 13.2  | 5.5  | 7.7  | -2.1  |
| TRAF3IP2 | 3  | 12.3  | 5.0  | 7.3  | -2.2  |
| GYG2     | 0  | 9.1   | 3.0  | 6.1  | -3.0  |
| DCBLD2   | 3  | 23.5  | 15.3 | 8.2  | 7.1   |
| SOAT1    | 1  | 11.4  | 6.6  | 4.8  | 1.9   |
| PKP2     | 0  | 10.2  | 2.9  | 7.3  | -4.4  |
| GDI2     | 1  | 32.9  | 29.3 | 3.6  | 25.6  |
| ATG5     | 6  | 52.2  | 8.9  | 43.3 | -34.4 |
| PITHD1   | 2  | 10.9  | 3.6  | 7.3  | -3.7  |
| MTA3     | 1  | 16.7  | 11.0 | 5.7  | 5.3   |
| USP13    | 0  | 11.0  | 3.1  | 7.9  | -4.9  |
| ATP11B   | 1  | 18.7  | 15.8 | 2.9  | 12.8  |
| CDK14    | 0  | 6.5   | 2.5  | 4.0  | -1.6  |
| SEC61A1  | 0  | 15.1  | 7.0  | 8.1  | -1.0  |
| PPP1R12A | 1  | 60.0  | 54.1 | 6.0  | 48.1  |
| CROCC    | 0  | 9.0   | 4.6  | 4.3  | 0.3   |

|          |    |       |       |      |       |
|----------|----|-------|-------|------|-------|
| POLR3E   | 0  | 13.6  | 3.9   | 9.7  | -5.7  |
| ATP2B4   | 3  | 15.9  | 9.6   | 6.3  | 3.2   |
| ZC3H11A  | 1  | 61.0  | 57.8  | 3.2  | 54.6  |
| RIOK2    | 1  | 72.3  | 56.3  | 16.0 | 40.4  |
| YIPF1    | 0  | 12.1  | 5.2   | 6.9  | -1.6  |
| NDC1     | 7  | 20.1  | 3.3   | 16.8 | -13.5 |
| FLYWCH1  | 0  | 10.9  | 4.6   | 6.4  | -1.8  |
| UNKL     | 0  | 7.4   | 2.5   | 4.9  | -2.4  |
| TBXAS1   | 3  | 8.0   | 2.7   | 5.3  | -2.6  |
| PARP12   | 3  | 11.8  | 3.7   | 8.2  | -4.5  |
| ALDH18A1 | 0  | 11.2  | 5.7   | 5.4  | 0.3   |
| TARBP1   | 1  | 12.3  | 8.9   | 3.4  | 5.5   |
| GATB     | 0  | 12.9  | 5.7   | 7.2  | -1.5  |
| CDK17    | 1  | 31.5  | 26.9  | 4.6  | 22.3  |
| DNAJC25  | 0  | 11.8  | 3.5   | 8.3  | -4.7  |
| CTDP1    | 2  | 35.6  | 17.8  | 17.8 | -0.1  |
| YBX3     | 1  | 5.6   | 2.8   | 2.8  | 0.1   |
| WNK1     | 1  | 28.4  | 23.5  | 4.9  | 18.5  |
| CCAR1    | 1  | 119.9 | 108.8 | 11.1 | 97.7  |
| OGFR     | 2  | 15.2  | 5.6   | 9.7  | -4.1  |
| PIGV     | 11 | 20.6  | 1.3   | 19.3 | -18.0 |
| PTPRU    | 0  | 9.4   | 3.9   | 5.5  | -1.7  |
| SNRNP40  | 0  | 13.9  | 5.7   | 8.2  | -2.5  |
| QSER1    | 1  | 34.8  | 30.1  | 4.6  | 25.5  |
| MPC1     | 4  | 10.7  | 3.3   | 7.5  | -4.2  |
| ACAA1    | 4  | 22.2  | 11.4  | 10.8 | 0.5   |
| BCAT1    | 1  | 10.6  | 6.3   | 4.2  | 2.1   |
| HDAC7    | 3  | 17.2  | 9.8   | 7.4  | 2.4   |
| SPAG4    | 0  | 7.5   | 4.0   | 3.6  | 0.4   |
| NCKAP1   | 1  | 105.2 | 96.6  | 8.6  | 88.1  |
| MRPS35   | 1  | 23.8  | 15.9  | 7.9  | 8.1   |
| SFSWAP   | 0  | 7.9   | 2.8   | 5.0  | -2.2  |
| TNK2     | 0  | 9.4   | 4.5   | 4.9  | -0.3  |
| MON2     | 1  | 36.4  | 33.4  | 3.0  | 30.5  |
| GPBP1    | 1  | 89.8  | 84.0  | 5.8  | 78.1  |
| DGAT2    | 4  | 13.5  | 3.5   | 10.0 | -6.4  |
| CS       | 7  | 12.6  | 1.1   | 11.5 | -10.4 |
| MRPS24   | 2  | 18.4  | 7.5   | 10.8 | -3.3  |
| ELMO2    | 0  | 9.6   | 5.2   | 4.4  | 0.8   |
| WAPL     | 1  | 48.9  | 39.4  | 9.5  | 29.9  |
| VMP1     | 1  | 70.2  | 66.1  | 4.2  | 61.9  |
| APPBP2   | 1  | 23.3  | 19.8  | 3.5  | 16.3  |
| POLD1    | 5  | 15.8  | 4.8   | 11.0 | -6.1  |
| EIF4B    | 1  | 16.9  | 11.5  | 5.4  | 6.1   |
| GLTSCR1  | 2  | 29.6  | 10.8  | 18.8 | -7.9  |
| SPHK2    | 4  | 20.2  | 4.8   | 15.4 | -10.7 |
| RPL18    | 0  | 10.2  | 5.4   | 4.8  | 0.6   |
| ISOC2    | 2  | 14.5  | 4.3   | 10.2 | -5.9  |
| U2AF2    | 2  | 19.6  | 6.0   | 13.6 | -7.7  |
| EPN1     | 0  | 17.0  | 6.7   | 10.2 | -3.5  |
| MED29    | 0  | 8.1   | 4.4   | 3.8  | 0.6   |
| MTMR1    | 0  | 6.1   | 2.7   | 3.3  | -0.6  |
| GPC1     | 3  | 11.7  | 4.2   | 7.5  | -3.3  |
| HAGH     | 12 | 12.1  | 1.3   | 10.7 | -9.4  |

|           |    |       |       |      |       |
|-----------|----|-------|-------|------|-------|
| RNF4      | 0  | 10.3  | 3.6   | 6.8  | -3.2  |
| CASP8     | 0  | 7.6   | 2.7   | 4.9  | -2.2  |
| LIMCH1    | 3  | 8.9   | 3.1   | 5.8  | -2.7  |
| ASUN      | 1  | 65.6  | 52.2  | 13.4 | 38.7  |
| TM7SF3    | 1  | 11.4  | 6.7   | 4.7  | 2.1   |
| SPA17     | 0  | 12.4  | 4.7   | 7.7  | -3.0  |
| TAF2      | 1  | 30.7  | 27.1  | 3.6  | 23.5  |
| HIPK2     | 3  | 9.5   | 2.6   | 6.9  | -4.3  |
| TNPO3     | 1  | 9.9   | 5.4   | 4.5  | 0.8   |
| BORCS8-ME | 8  | 13.5  | 2.1   | 11.5 | -9.4  |
| RFXANK    | 8  | 14.4  | 2.6   | 11.9 | -9.3  |
| TMEM161A  | 2  | 19.1  | 5.8   | 13.3 | -7.5  |
| CTSA      | 0  | 9.1   | 4.7   | 4.4  | 0.3   |
| SUGP2     | 0  | 8.7   | 2.8   | 5.9  | -3.1  |
| SLC12A2   | 0  | 7.4   | 2.3   | 5.2  | -2.9  |
| SNX24     | 0  | 8.8   | 3.3   | 5.5  | -2.1  |
| CNN2      | 3  | 11.0  | 3.6   | 7.4  | -3.8  |
| ABCA7     | 0  | 11.2  | 4.3   | 6.9  | -2.6  |
| DDX20     | 1  | 14.8  | 10.1  | 4.7  | 5.4   |
| BTBD1     | 1  | 36.6  | 33.8  | 2.8  | 31.0  |
| SBNO2     | 0  | 13.4  | 4.3   | 9.1  | -4.8  |
| PMS1      | 1  | 43.9  | 35.3  | 8.6  | 26.7  |
| HMG20B    | 8  | 17.1  | 3.5   | 13.6 | -10.1 |
| TAF11     | 0  | 10.9  | 4.5   | 6.4  | -1.9  |
| ANKS1A    | 2  | 37.4  | 17.3  | 20.1 | -2.8  |
| AP3D1     | 8  | 11.0  | 3.6   | 7.4  | -3.8  |
| ZNF76     | 2  | 23.8  | 8.4   | 15.4 | -7.0  |
| SLC9A3R2  | 3  | 9.9   | 3.0   | 6.9  | -4.0  |
| NTHL1     | 12 | 14.6  | 2.2   | 12.5 | -10.3 |
| UHRF1BP1  | 0  | 10.4  | 4.5   | 5.8  | -1.3  |
| IPO5      | 1  | 14.5  | 9.0   | 5.4  | 3.6   |
| OAT       | 1  | 13.8  | 9.1   | 4.7  | 4.4   |
| WDR3      | 1  | 21.5  | 15.8  | 5.8  | 10.0  |
| PKN2      | 1  | 68.7  | 61.8  | 6.8  | 55.0  |
| WDR18     | 8  | 26.0  | 7.2   | 18.8 | -11.6 |
| TRAM2     | 3  | 11.5  | 5.1   | 6.3  | -1.2  |
| MCM10     | 7  | 24.3  | 5.1   | 19.2 | -14.1 |
| DGKA      | 1  | 11.2  | 5.9   | 5.3  | 0.6   |
| ERBB3     | 4  | 27.3  | 17.3  | 10.0 | 7.3   |
| KARS      | 0  | 14.4  | 6.1   | 8.2  | -2.1  |
| ADAT1     | 0  | 7.9   | 3.4   | 4.4  | -1.0  |
| PDIA5     | 0  | 7.9   | 4.3   | 3.6  | 0.6   |
| TBC1D22B  | 2  | 25.9  | 11.0  | 14.9 | -3.9  |
| NDUFB4    | 0  | 7.1   | 3.2   | 3.8  | -0.6  |
| SPEN      | 1  | 8.8   | 5.7   | 3.1  | 2.6   |
| MYLK      | 3  | 22.0  | 14.1  | 7.8  | 6.3   |
| ZC3H15    | 1  | 114.6 | 106.8 | 7.7  | 99.1  |
| MAP2K4    | 1  | 12.2  | 8.3   | 3.9  | 4.4   |
| TMEM206   | 0  | 7.7   | 3.4   | 4.3  | -0.9  |
| SLK       | 1  | 41.6  | 36.3  | 5.3  | 31.1  |
| CYB5R4    | 1  | 18.4  | 12.5  | 5.9  | 6.5   |
| SEC61A2   | 0  | 7.5   | 2.8   | 4.7  | -2.0  |
| ASB1      | 0  | 9.2   | 4.4   | 4.8  | -0.5  |
| FAM107B   | 0  | 8.0   | 2.6   | 5.4  | -2.8  |

|          |   |      |      |      |       |
|----------|---|------|------|------|-------|
| ME1      | 0 | 6.7  | 2.5  | 4.3  | -1.8  |
| TBC1D1   | 0 | 9.3  | 2.0  | 7.3  | -5.4  |
| CDK13    | 1 | 13.8 | 10.4 | 3.4  | 7.0   |
| SLC9A7   | 0 | 7.8  | 3.9  | 3.9  | 0.0   |
| FOXJ2    | 0 | 10.6 | 5.3  | 5.3  | 0.0   |
| YBX1     | 0 | 9.7  | 3.9  | 5.8  | -1.9  |
| PPP2R5A  | 0 | 8.2  | 2.5  | 5.6  | -3.1  |
| ELAVL1   | 8 | 22.4 | 5.5  | 16.8 | -11.3 |
| DIP2B    | 4 | 17.9 | 8.1  | 9.8  | -1.7  |
| SMARCD1  | 6 | 13.7 | 2.2  | 11.5 | -9.3  |
| KDM4A    | 0 | 10.2 | 5.1  | 5.0  | 0.1   |
| NFYC     | 0 | 10.0 | 5.1  | 4.9  | 0.2   |
| ASPM     | 7 | 35.8 | 5.7  | 30.1 | -24.4 |
| ELOVL1   | 3 | 14.3 | 3.7  | 10.6 | -6.9  |
| ZNRD1    | 2 | 23.9 | 10.8 | 13.0 | -2.2  |
| ZBTB11   | 1 | 32.3 | 29.6 | 2.7  | 26.9  |
| ATXN3    | 1 | 25.8 | 20.8 | 5.0  | 15.8  |
| GOLGA5   | 1 | 22.1 | 19.4 | 2.8  | 16.6  |
| LRRC40   | 1 | 43.1 | 35.0 | 8.1  | 26.9  |
| ISOC1    | 4 | 15.2 | 3.7  | 11.6 | -7.9  |
| EML1     | 1 | 9.7  | 5.5  | 4.1  | 1.4   |
| TRMT11   | 1 | 29.2 | 23.8 | 5.3  | 18.5  |
| THUMPD1  | 1 | 21.1 | 18.3 | 2.8  | 15.6  |
| MSANTD3  | 3 | 16.9 | 9.3  | 7.6  | 1.7   |
| ARFGEF1  | 1 | 24.9 | 22.2 | 2.7  | 19.4  |
| ZFAT     | 2 | 12.1 | 3.7  | 8.4  | -4.8  |
| MTFR1    | 1 | 25.4 | 21.8 | 3.6  | 18.2  |
| FECH     | 0 | 7.6  | 3.4  | 4.1  | -0.7  |
| PFKP     | 3 | 9.7  | 4.6  | 5.0  | -0.4  |
| IDI1     | 1 | 13.1 | 9.5  | 3.7  | 5.8   |
| SP100    | 3 | 21.2 | 12.1 | 9.1  | 2.9   |
| KLF6     | 1 | 10.9 | 4.8  | 6.0  | -1.2  |
| PLPP1    | 0 | 8.7  | 3.8  | 4.8  | -1.0  |
| NEO1     | 0 | 6.1  | 2.8  | 3.3  | -0.5  |
| TRAM1    | 1 | 49.0 | 45.7 | 3.2  | 42.5  |
| TNFRSF1A | 0 | 8.1  | 3.6  | 4.5  | -0.9  |
| EVI5     | 1 | 25.2 | 21.7 | 3.5  | 18.2  |
| STOML1   | 3 | 21.4 | 6.5  | 14.9 | -8.5  |
| PKM      | 3 | 12.4 | 5.5  | 6.9  | -1.4  |
| DHX29    | 1 | 36.3 | 31.6 | 4.7  | 26.9  |
| DNTTIP2  | 1 | 81.2 | 72.6 | 8.7  | 63.9  |
| METTL22  | 0 | 8.0  | 3.6  | 4.4  | -0.8  |
| TP53BP1  | 1 | 18.5 | 15.3 | 3.2  | 12.2  |
| RRP15    | 1 | 39.7 | 27.4 | 12.4 | 15.0  |
| RHOA     | 0 | 8.2  | 3.5  | 4.7  | -1.2  |
| DHX8     | 0 | 5.8  | 2.3  | 3.5  | -1.3  |
| PRKCZ    | 0 | 8.9  | 3.7  | 5.2  | -1.5  |
| IARS2    | 1 | 39.2 | 33.2 | 6.1  | 27.1  |
| NAV3     | 7 | 12.0 | 1.0  | 11.0 | -10.0 |
| IDH3G    | 0 | 12.8 | 5.8  | 6.9  | -1.1  |
| ROGDI    | 0 | 7.1  | 3.1  | 4.0  | -0.8  |
| ROCK1    | 1 | 37.1 | 33.6 | 3.5  | 30.1  |
| CBFB     | 1 | 26.4 | 21.0 | 5.5  | 15.5  |
| HYAL2    | 2 | 20.0 | 6.8  | 13.2 | -6.4  |

|         |   |       |       |      |       |
|---------|---|-------|-------|------|-------|
| HDAC4   | 0 | 9.5   | 4.5   | 5.0  | -0.5  |
| RASSF1  | 0 | 16.7  | 6.1   | 10.6 | -4.6  |
| FGFR3   | 4 | 28.6  | 15.4  | 13.1 | 2.3   |
| IFI35   | 0 | 14.8  | 6.3   | 8.5  | -2.2  |
| HEATR6  | 0 | 7.2   | 3.3   | 4.0  | -0.7  |
| COASY   | 4 | 15.3  | 4.2   | 11.0 | -6.8  |
| PLEKHH3 | 2 | 23.5  | 9.6   | 13.9 | -4.3  |
| MEF2A   | 0 | 8.3   | 2.5   | 5.7  | -3.2  |
| OTUD5   | 0 | 7.2   | 3.6   | 3.6  | 0.0   |
| TFE3    | 3 | 14.7  | 6.5   | 8.2  | -1.6  |
| TBC1D25 | 0 | 16.6  | 7.1   | 9.5  | -2.4  |
| ACSL4   | 1 | 10.1  | 7.5   | 2.6  | 4.8   |
| INPP5A  | 0 | 10.4  | 4.7   | 5.8  | -1.1  |
| GPKOW   | 0 | 12.5  | 5.2   | 7.3  | -2.1  |
| GRIPAP1 | 0 | 6.5   | 2.8   | 3.7  | -0.9  |
| FTSJ1   | 3 | 13.1  | 6.3   | 6.8  | -0.6  |
| PRR11   | 5 | 18.9  | 7.3   | 11.6 | -4.4  |
| ATP11A  | 0 | 8.8   | 4.1   | 4.7  | -0.6  |
| POLR1A  | 0 | 10.6  | 4.7   | 6.0  | -1.3  |
| LAPTM4A | 1 | 9.9   | 5.7   | 4.2  | 1.6   |
| TTC7A   | 0 | 9.1   | 3.7   | 5.4  | -1.7  |
| IP6K2   | 0 | 12.3  | 5.7   | 6.7  | -1.0  |
| KIF2A   | 1 | 54.6  | 47.0  | 7.6  | 39.4  |
| PSME4   | 1 | 46.9  | 40.5  | 6.4  | 34.2  |
| IFT80   | 1 | 22.6  | 19.0  | 3.6  | 15.4  |
| SIRT2   | 0 | 14.2  | 6.0   | 8.3  | -2.3  |
| ERLEC1  | 1 | 22.0  | 18.7  | 3.3  | 15.5  |
| PPP2R5B | 0 | 17.6  | 7.3   | 10.3 | -2.9  |
| PITX1   | 2 | 10.6  | 3.6   | 7.0  | -3.3  |
| NUP133  | 1 | 9.6   | 5.9   | 3.8  | 2.1   |
| NUCKS1  | 1 | 123.1 | 111.9 | 11.2 | 100.8 |
| VPS35   | 1 | 58.2  | 47.3  | 10.9 | 36.4  |
| DNAJA2  | 1 | 12.0  | 6.1   | 6.0  | 0.1   |
| BCL3    | 3 | 17.5  | 6.1   | 11.4 | -5.3  |
| KCNAB2  | 0 | 6.6   | 2.7   | 3.9  | -1.2  |
| FUNDC1  | 1 | 13.4  | 7.9   | 5.4  | 2.5   |
| MAOB    | 4 | 20.2  | 10.2  | 10.1 | 0.1   |
| ATP1B3  | 6 | 53.7  | 15.0  | 38.7 | -23.6 |
| NEDD4   | 1 | 35.5  | 32.6  | 3.0  | 29.6  |
| PIGB    | 1 | 7.3   | 4.0   | 3.3  | 0.7   |
| MAPK6   | 1 | 37.2  | 34.2  | 3.0  | 31.1  |
| GNB5    | 3 | 8.6   | 2.9   | 5.6  | -2.7  |
| RAB27A  | 0 | 7.8   | 2.7   | 5.1  | -2.4  |
| CECR5   | 2 | 13.4  | 4.9   | 8.5  | -3.6  |
| UFD1L   | 5 | 10.9  | 2.5   | 8.4  | -5.9  |
| LRP6    | 1 | 14.5  | 8.7   | 5.8  | 2.9   |
| PHRF1   | 8 | 28.0  | 4.7   | 23.3 | -18.6 |
| IKBKAP  | 1 | 16.2  | 11.0  | 5.2  | 5.7   |
| NUCB2   | 1 | 34.2  | 31.0  | 3.2  | 27.8  |
| PFN2    | 1 | 11.4  | 6.9   | 4.5  | 2.3   |
| PTPN3   | 4 | 8.7   | 2.7   | 6.0  | -3.3  |
| SLC44A1 | 0 | 7.1   | 2.7   | 4.4  | -1.6  |
| TMEM260 | 0 | 7.5   | 3.4   | 4.2  | -0.8  |
| SMG6    | 0 | 9.6   | 5.0   | 4.7  | 0.3   |

|           |    |      |      |      |       |
|-----------|----|------|------|------|-------|
| EXOC5     | 1  | 77.9 | 72.2 | 5.7  | 66.6  |
| CLTCL1    | 3  | 8.7  | 2.6  | 6.1  | -3.5  |
| FSTL3     | 3  | 14.3 | 7.7  | 6.5  | 1.2   |
| DGCR2     | 0  | 13.6 | 6.1  | 7.5  | -1.4  |
| RNF126    | 8  | 27.4 | 9.0  | 18.4 | -9.4  |
| MNT       | 0  | 12.4 | 5.6  | 6.8  | -1.2  |
| ZXDC      | 2  | 13.5 | 4.3  | 9.2  | -4.8  |
| JMJD6     | 0  | 9.3  | 4.0  | 5.3  | -1.3  |
| POLB      | 0  | 8.8  | 3.3  | 5.5  | -2.1  |
| WIPI1     | 0  | 7.7  | 4.3  | 3.4  | 1.0   |
| GBA2      | 0  | 10.3 | 4.6  | 5.7  | -1.1  |
| NDST1     | 3  | 12.1 | 4.2  | 7.9  | -3.7  |
| ASNS      | 0  | 7.4  | 2.6  | 4.8  | -2.2  |
| AP3M2     | 0  | 9.3  | 3.1  | 6.2  | -3.0  |
| ST6GALNAC | 0  | 14.4 | 5.6  | 8.8  | -3.3  |
| PABPC1    | 1  | 24.6 | 20.0 | 4.5  | 15.5  |
| CFAP20    | 0  | 9.9  | 4.6  | 5.3  | -0.8  |
| CSNK2A2   | 0  | 10.5 | 4.8  | 5.7  | -0.9  |
| PTPN21    | 0  | 8.7  | 2.9  | 5.8  | -2.9  |
| EIF2B3    | 0  | 13.7 | 5.8  | 8.0  | -2.2  |
| TCOF1     | 5  | 16.0 | 4.5  | 11.5 | -7.1  |
| CDC42     | 1  | 39.1 | 34.9 | 4.2  | 30.8  |
| OSBPL3    | 0  | 5.3  | 1.9  | 3.4  | -1.5  |
| RAD18     | 1  | 19.5 | 14.0 | 5.5  | 8.5   |
| ATP2B1    | 1  | 22.0 | 18.7 | 3.3  | 15.4  |
| NCK2      | 0  | 8.4  | 4.0  | 4.4  | -0.4  |
| MAP4K4    | 0  | 9.6  | 3.1  | 6.5  | -3.3  |
| RPL31     | 6  | 20.2 | 4.7  | 15.5 | -10.8 |
| WDR1      | 0  | 15.2 | 2.9  | 12.3 | -9.4  |
| SNX13     | 1  | 24.6 | 22.2 | 2.5  | 19.7  |
| ING3      | 1  | 18.0 | 14.5 | 3.5  | 11.0  |
| LMCD1     | 3  | 10.3 | 3.6  | 6.7  | -3.0  |
| WBSCR22   | 0  | 8.4  | 3.4  | 5.0  | -1.6  |
| SEL1L     | 1  | 26.2 | 20.0 | 6.2  | 13.7  |
| TRIP13    | 5  | 23.5 | 8.7  | 14.8 | -6.1  |
| ATP6AP1   | 0  | 12.3 | 6.2  | 6.0  | 0.2   |
| TCF3      | 8  | 16.8 | 5.9  | 10.9 | -5.0  |
| DAZAP1    | 8  | 13.5 | 2.6  | 10.9 | -8.3  |
| MBD3      | 8  | 26.9 | 9.6  | 17.3 | -7.7  |
| HLTF      | 1  | 27.6 | 23.8 | 3.8  | 20.0  |
| FAM50A    | 0  | 6.7  | 3.3  | 3.5  | -0.2  |
| FAM3A     | 0  | 21.1 | 8.9  | 12.1 | -3.2  |
| CPSF1     | 13 | 11.0 | 1.8  | 9.2  | -7.3  |
| CYBRD1    | 3  | 10.9 | 3.4  | 7.5  | -4.1  |
| PDCD2     | 0  | 8.2  | 3.4  | 4.8  | -1.3  |
| RDH11     | 1  | 15.8 | 11.9 | 4.0  | 7.9   |
| PRKACA    | 8  | 17.3 | 4.5  | 12.9 | -8.4  |
| ADGRL1    | 0  | 10.7 | 4.4  | 6.3  | -1.9  |
| ACTN1     | 3  | 19.1 | 11.1 | 8.0  | 3.1   |
| ZFYVE26   | 0  | 9.9  | 4.9  | 4.9  | 0.0   |
| EPN2      | 0  | 6.5  | 2.4  | 4.1  | -1.7  |
| PTPN18    | 4  | 14.2 | 3.5  | 10.7 | -7.2  |
| SPEG      | 3  | 17.0 | 10.9 | 6.1  | 4.9   |
| ALDH3A2   | 4  | 9.4  | 2.9  | 6.6  | -3.7  |

|          |    |      |      |      |       |
|----------|----|------|------|------|-------|
| TFRC     | 1  | 69.0 | 63.6 | 5.4  | 58.2  |
| SREBF1   | 0  | 7.7  | 2.2  | 5.4  | -3.2  |
| AFF4     | 1  | 29.4 | 25.2 | 4.2  | 21.1  |
| UBE2D1   | 1  | 29.8 | 21.7 | 8.1  | 13.6  |
| MPP5     | 1  | 17.1 | 12.8 | 4.3  | 8.5   |
| RHOBTB1  | 0  | 5.1  | 2.2  | 2.8  | -0.6  |
| SMC1A    | 1  | 22.7 | 14.3 | 8.3  | 6.0   |
| HSD17B10 | 0  | 8.8  | 3.8  | 5.0  | -1.3  |
| MARK2    | 2  | 27.0 | 11.8 | 15.2 | -3.4  |
| HMMR     | 7  | 24.4 | 5.2  | 19.2 | -14.0 |
| CHFR     | 0  | 7.3  | 3.5  | 3.8  | -0.3  |
| P4HA2    | 3  | 11.5 | 5.4  | 6.1  | -0.7  |
| NFATC3   | 0  | 14.1 | 6.5  | 7.6  | -1.1  |
| TRNT1    | 1  | 11.9 | 8.5  | 3.4  | 5.1   |
| ACADVL   | 0  | 8.8  | 3.7  | 5.1  | -1.3  |
| STK10    | 0  | 8.3  | 3.6  | 4.7  | -1.1  |
| FBXW11   | 0  | 7.8  | 3.5  | 4.3  | -0.9  |
| EVC      | 3  | 11.3 | 5.1  | 6.3  | -1.2  |
| DERL2    | 1  | 21.6 | 15.4 | 6.3  | 9.1   |
| NDE1     | 0  | 8.1  | 3.2  | 5.0  | -1.8  |
| AP1M1    | 3  | 17.8 | 6.7  | 11.1 | -4.3  |
| PVR      | 3  | 8.1  | 2.6  | 5.5  | -2.9  |
| XRCC1    | 3  | 10.1 | 3.4  | 6.7  | -3.4  |
| SCARB1   | 4  | 19.8 | 9.4  | 10.5 | -1.1  |
| MCM2     | 5  | 23.7 | 11.6 | 12.1 | -0.5  |
| SELO     | 2  | 23.1 | 10.1 | 12.9 | -2.8  |
| LLGL2    | 4  | 22.1 | 10.5 | 11.6 | -1.1  |
| PDE8A    | 1  | 14.7 | 9.1  | 5.6  | 3.5   |
| NLE1     | 0  | 16.9 | 6.4  | 10.5 | -4.0  |
| SDHA     | 0  | 8.8  | 3.9  | 5.0  | -1.1  |
| SMARCE1  | 1  | 39.7 | 36.1 | 3.7  | 32.4  |
| GSDMB    | 0  | 8.6  | 4.0  | 4.6  | -0.5  |
| KDM5A    | 1  | 18.8 | 15.0 | 3.8  | 11.2  |
| FERMT2   | 1  | 32.6 | 26.2 | 6.4  | 19.8  |
| IGF2BP2  | 1  | 11.1 | 6.1  | 5.0  | 1.1   |
| MAP3K13  | 0  | 6.1  | 2.1  | 4.0  | -2.0  |
| ST6GAL1  | 4  | 20.3 | 11.6 | 8.7  | 2.8   |
| PICALM   | 1  | 51.9 | 47.3 | 4.6  | 42.7  |
| NSF      | 1  | 12.9 | 8.6  | 4.2  | 4.4   |
| CLASP1   | 1  | 17.2 | 9.8  | 7.4  | 2.4   |
| MRPS34   | 12 | 21.9 | 4.5  | 17.4 | -12.9 |
| CLNS1A   | 1  | 24.4 | 17.1 | 7.3  | 9.8   |
| TEAD2    | 0  | 10.7 | 5.1  | 5.6  | -0.6  |
| EED      | 7  | 17.8 | 2.6  | 15.2 | -12.6 |
| TSG101   | 6  | 32.4 | 5.6  | 26.7 | -21.1 |
| NCBP3    | 1  | 31.2 | 22.7 | 8.5  | 14.1  |
| CA12     | 0  | 11.6 | 4.8  | 6.9  | -2.1  |
| MGLL     | 3  | 11.3 | 5.1  | 6.2  | -1.1  |
| NTN4     | 3  | 11.8 | 6.2  | 5.6  | 0.5   |
| BCS1L    | 0  | 9.1  | 4.0  | 5.1  | -1.2  |
| NUAK1    | 0  | 11.2 | 2.9  | 8.4  | -5.5  |
| DPP8     | 1  | 22.6 | 19.1 | 3.5  | 15.5  |
| ZNF532   | 0  | 8.3  | 2.9  | 5.4  | -2.5  |
| LMAN1    | 1  | 33.6 | 31.2 | 2.4  | 28.9  |

|           |   |      |      |      |       |
|-----------|---|------|------|------|-------|
| HACD3     | 1 | 19.3 | 14.2 | 5.1  | 9.1   |
| ZZEF1     | 0 | 11.6 | 6.4  | 5.3  | 1.1   |
| ENO1      | 3 | 13.6 | 4.0  | 9.6  | -5.6  |
| MYDGF     | 8 | 16.6 | 3.5  | 13.1 | -9.6  |
| TUBE1     | 1 | 10.1 | 5.9  | 4.2  | 1.7   |
| ARHGEF10I | 4 | 21.3 | 8.2  | 13.0 | -4.8  |
| ACTR6     | 1 | 28.5 | 23.4 | 5.1  | 18.3  |
| TIPIN     | 7 | 19.6 | 3.3  | 16.3 | -13.0 |
| SRI       | 0 | 4.1  | 1.8  | 2.3  | -0.4  |
| EIF4G3    | 1 | 19.3 | 16.0 | 3.4  | 12.6  |
| NUP37     | 7 | 21.2 | 3.3  | 18.0 | -14.7 |
| SEMA3A    | 0 | 8.5  | 3.6  | 4.9  | -1.4  |
| GTSE1     | 5 | 17.5 | 6.6  | 10.9 | -4.3  |
| SEMA3C    | 1 | 17.7 | 8.4  | 9.2  | -0.8  |
| TTC38     | 4 | 12.9 | 5.7  | 7.2  | -1.4  |
| ACAT1     | 1 | 22.8 | 16.0 | 6.8  | 9.1   |
| GRAMD4    | 0 | 8.2  | 3.2  | 4.9  | -1.7  |
| CELSR1    | 0 | 6.2  | 2.6  | 3.6  | -1.1  |
| ZNF638    | 1 | 83.0 | 77.8 | 5.2  | 72.5  |
| SLC25A40  | 7 | 16.9 | 2.5  | 14.4 | -11.8 |
| TIMM21    | 1 | 25.1 | 20.3 | 4.9  | 15.4  |
| RASAL2    | 0 | 10.4 | 2.5  | 7.9  | -5.4  |
| VPS9D1    | 0 | 8.4  | 4.4  | 4.1  | 0.3   |
| MARK3     | 1 | 46.9 | 41.5 | 5.4  | 36.1  |
| SLC25A3   | 0 | 15.5 | 5.4  | 10.0 | -4.6  |
| FNDC3B    | 0 | 10.6 | 3.9  | 6.8  | -2.9  |
| FOSL2     | 3 | 20.2 | 13.8 | 6.5  | 7.3   |
| FRYL      | 1 | 18.7 | 12.1 | 6.6  | 5.5   |
| TMEM131   | 1 | 10.7 | 7.0  | 3.7  | 3.4   |
| FSCN1     | 3 | 10.7 | 4.6  | 6.1  | -1.5  |
| ACTB      | 3 | 18.4 | 9.9  | 8.5  | 1.4   |
| MOCOS     | 0 | 9.3  | 4.2  | 5.1  | -0.9  |
| PLD1      | 1 | 11.1 | 7.3  | 3.8  | 3.5   |
| WDR62     | 0 | 13.1 | 4.6  | 8.5  | -3.9  |
| DLG1      | 1 | 47.7 | 43.6 | 4.1  | 39.5  |
| RAB7A     | 1 | 22.4 | 18.2 | 4.3  | 13.9  |
| BCAP29    | 1 | 46.4 | 39.3 | 7.2  | 32.1  |
| SART3     | 0 | 16.3 | 6.7  | 9.6  | -2.9  |
| EXOSC7    | 0 | 15.7 | 7.2  | 8.5  | -1.3  |
| KIFAP3    | 3 | 9.0  | 2.6  | 6.4  | -3.9  |
| MKRN2     | 0 | 7.7  | 4.0  | 3.7  | 0.4   |
| MCM6      | 5 | 26.5 | 9.7  | 16.8 | -7.1  |
| REXO2     | 1 | 18.1 | 9.3  | 8.8  | 0.6   |
| RBM7      | 1 | 38.5 | 32.3 | 6.3  | 26.0  |
| RBMS2     | 0 | 9.5  | 4.4  | 5.0  | -0.6  |
| BAZ2A     | 0 | 13.5 | 6.9  | 6.6  | 0.3   |
| PTPN23    | 0 | 12.8 | 6.2  | 6.7  | -0.5  |
| MLH1      | 6 | 32.5 | 5.3  | 27.2 | -21.9 |
| UNG       | 5 | 18.7 | 3.9  | 14.8 | -10.9 |
| KLHL20    | 1 | 9.0  | 5.2  | 3.8  | 1.4   |
| SLC46A1   | 4 | 14.6 | 6.5  | 8.1  | -1.7  |
| SPAG5     | 5 | 32.5 | 14.7 | 17.8 | -3.2  |
| ANKRD13A  | 0 | 6.6  | 2.8  | 3.7  | -0.9  |
| TPD52     | 1 | 21.2 | 13.8 | 7.4  | 6.4   |



|          |    |       |       |      |       |
|----------|----|-------|-------|------|-------|
| TRAF4    | 4  | 17.3  | 7.4   | 9.9  | -2.6  |
| GPATCH1  | 0  | 7.2   | 3.1   | 4.1  | -1.0  |
| ICAM3    | 2  | 14.2  | 4.1   | 10.1 | -6.0  |
| NT5C2    | 1  | 33.0  | 29.0  | 3.9  | 25.1  |
| MCAM     | 3  | 12.0  | 6.2   | 5.8  | 0.4   |
| RAP1GAP  | 4  | 20.1  | 8.7   | 11.4 | -2.7  |
| XAB2     | 8  | 34.2  | 10.8  | 23.4 | -12.6 |
| ARHGEF1  | 0  | 10.5  | 4.6   | 5.9  | -1.2  |
| STXBP2   | 4  | 10.6  | 3.2   | 7.4  | -4.2  |
| MAP2K7   | 8  | 9.3   | 2.0   | 7.3  | -5.2  |
| DGKD     | 0  | 8.2   | 2.6   | 5.6  | -3.0  |
| TOP2B    | 1  | 119.5 | 110.1 | 9.4  | 100.7 |
| TM9SF3   | 1  | 99.4  | 92.9  | 6.5  | 86.5  |
| NFKB2    | 0  | 13.1  | 5.4   | 7.7  | -2.3  |
| UBE2T    | 5  | 27.0  | 16.8  | 10.2 | 6.6   |
| DNAJC10  | 1  | 70.5  | 64.6  | 5.9  | 58.7  |
| GTF3C1   | 11 | 6.7   | 0.7   | 6.0  | -5.4  |
| IL4R     | 0  | 10.0  | 4.1   | 6.0  | -1.9  |
| USP33    | 1  | 59.4  | 54.5  | 4.9  | 49.7  |
| SNRPA    | 5  | 25.4  | 6.7   | 18.7 | -12.0 |
| EXOSC5   | 2  | 16.5  | 6.0   | 10.6 | -4.6  |
| DYNC1I2  | 1  | 50.7  | 45.2  | 5.5  | 39.6  |
| LRCH4    | 2  | 22.1  | 7.8   | 14.3 | -6.5  |
| FAM76B   | 1  | 38.4  | 34.3  | 4.1  | 30.2  |
| SIRT6    | 8  | 23.8  | 6.5   | 17.2 | -10.7 |
| POLD3    | 7  | 9.8   | 1.3   | 8.5  | -7.2  |
| CAPZB    | 3  | 13.1  | 5.2   | 7.9  | -2.7  |
| GPR137B  | 0  | 8.3   | 3.5   | 4.8  | -1.3  |
| JADE1    | 7  | 10.7  | 1.0   | 9.8  | -8.8  |
| SLC25A43 | 0  | 8.8   | 4.2   | 4.6  | -0.3  |
| UBE2A    | 3  | 11.8  | 3.7   | 8.1  | -4.5  |
| FGFR1    | 3  | 8.1   | 2.2   | 5.9  | -3.6  |
| FBLN1    | 0  | 5.5   | 2.3   | 3.1  | -0.8  |
| MAP2     | 0  | 7.0   | 2.2   | 4.8  | -2.6  |
| PIAS2    | 0  | 6.3   | 3.2   | 3.1  | 0.0   |
| ARAF     | 3  | 14.3  | 4.1   | 10.2 | -6.2  |
| MCCC1    | 1  | 10.3  | 5.9   | 4.4  | 1.6   |
| ACER3    | 0  | 6.2   | 2.6   | 3.5  | -0.9  |
| UBE2K    | 1  | 29.5  | 24.8  | 4.6  | 20.2  |
| PIK3C3   | 1  | 24.0  | 19.4  | 4.5  | 14.9  |
| TIGAR    | 1  | 20.8  | 16.3  | 4.5  | 11.8  |
| TULP3    | 0  | 8.5   | 4.4   | 4.1  | 0.3   |
| SYNJ2    | 3  | 8.9   | 4.4   | 4.6  | -0.2  |
| PPP2R5C  | 1  | 29.6  | 26.2  | 3.5  | 22.7  |
| GNB1     | 1  | 20.6  | 13.9  | 6.7  | 7.3   |
| EDN1     | 3  | 9.5   | 3.4   | 6.1  | -2.7  |
| MLLT10   | 1  | 12.8  | 8.8   | 4.0  | 4.8   |
| NRDC     | 1  | 67.8  | 62.2  | 5.6  | 56.7  |
| VDAC3    | 1  | 13.8  | 6.4   | 7.4  | -1.0  |
| PCM1     | 1  | 50.9  | 44.4  | 6.5  | 37.9  |
| CBFA2T2  | 0  | 12.3  | 6.4   | 5.9  | 0.5   |
| ITCH     | 1  | 53.1  | 48.1  | 5.0  | 43.1  |
| TP53INP2 | 0  | 12.5  | 6.3   | 6.2  | 0.2   |
| SDF4     | 0  | 13.3  | 7.1   | 6.2  | 0.9   |

|          |    |      |      |      |       |
|----------|----|------|------|------|-------|
| TOLLIP   | 8  | 17.8 | 2.3  | 15.5 | -13.2 |
| UBE2D4   | 2  | 21.6 | 8.8  | 12.8 | -4.0  |
| THOC1    | 1  | 40.8 | 36.0 | 4.7  | 31.3  |
| FKBP7    | 1  | 12.9 | 6.8  | 6.1  | 0.7   |
| XRCC5    | 1  | 82.7 | 73.5 | 9.2  | 64.2  |
| MKNK1    | 0  | 7.1  | 3.7  | 3.4  | 0.2   |
| REXO1    | 0  | 8.9  | 3.2  | 5.7  | -2.6  |
| SAR1A    | 1  | 72.0 | 60.6 | 11.5 | 49.1  |
| CEACAM1  | 4  | 22.8 | 13.1 | 9.7  | 3.5   |
| SENP1    | 1  | 24.4 | 16.9 | 7.4  | 9.5   |
| CIC      | 3  | 17.6 | 5.3  | 12.4 | -7.1  |
| FDFT1    | 0  | 6.7  | 2.8  | 4.0  | -1.2  |
| PAFAH1B3 | 5  | 10.3 | 3.0  | 7.3  | -4.4  |
| KIF22    | 5  | 24.4 | 12.8 | 11.6 | 1.1   |
| LRRC16A  | 0  | 5.1  | 1.9  | 3.2  | -1.4  |
| PGM1     | 0  | 8.1  | 3.9  | 4.2  | -0.3  |
| DDX1     | 1  | 92.3 | 86.6 | 5.7  | 80.9  |
| DNM2     | 8  | 13.7 | 2.0  | 11.7 | -9.7  |
| EPB41L2  | 1  | 21.7 | 16.5 | 5.2  | 11.2  |
| MOXD1    | 3  | 10.0 | 4.5  | 5.5  | -1.0  |
| STX7     | 1  | 20.1 | 16.3 | 3.8  | 12.5  |
| RABL2B   | 0  | 13.9 | 6.3  | 7.6  | -1.3  |
| KEAP1    | 0  | 7.3  | 2.4  | 5.0  | -2.6  |
| PTPRH    | 11 | 14.1 | 0.8  | 13.3 | -12.5 |
| SLC35C2  | 0  | 11.1 | 4.8  | 6.3  | -1.4  |
| RIF1     | 1  | 45.5 | 39.0 | 6.5  | 32.6  |
| RAB21    | 1  | 19.5 | 16.4 | 3.2  | 13.2  |
| SMARCA2  | 0  | 6.5  | 2.0  | 4.6  | -2.6  |
| SRCAP    | 11 | 20.9 | 1.6  | 19.3 | -17.6 |
| PUM3     | 1  | 20.6 | 16.0 | 4.6  | 11.4  |
| CNOT4    | 0  | 5.3  | 2.2  | 3.1  | -0.9  |
| PSEN1    | 0  | 8.5  | 4.0  | 4.5  | -0.4  |
| CPOX     | 0  | 6.9  | 3.0  | 3.9  | -0.9  |
| CLDND1   | 1  | 37.2 | 32.7 | 4.5  | 28.2  |
| MOK      | 3  | 8.6  | 3.4  | 5.2  | -1.7  |
| HSP90AA1 | 1  | 89.8 | 84.8 | 5.0  | 79.7  |
| RBL1     | 7  | 27.4 | 4.6  | 22.8 | -18.2 |
| DLGAP4   | 3  | 15.9 | 6.3  | 9.6  | -3.3  |
| NDC80    | 7  | 26.2 | 5.9  | 20.2 | -14.3 |
| AFP      | 4  | 21.7 | 12.2 | 9.6  | 2.6   |
| TCF7     | 0  | 7.5  | 3.7  | 3.8  | -0.1  |
| OSTM1    | 1  | 27.0 | 21.7 | 5.2  | 16.5  |
| PCNP     | 1  | 86.2 | 81.5 | 4.7  | 76.8  |
| EXD2     | 0  | 9.2  | 4.6  | 4.6  | 0.0   |
| ARG2     | 1  | 11.6 | 6.1  | 5.5  | 0.7   |
| UBA5     | 1  | 24.5 | 21.5 | 3.1  | 18.4  |
| STK17B   | 1  | 8.2  | 5.0  | 3.3  | 1.7   |
| CDC14B   | 0  | 9.8  | 3.1  | 6.7  | -3.6  |
| JMJD4    | 2  | 31.9 | 15.8 | 16.0 | -0.2  |
| DUSP12   | 1  | 9.8  | 5.1  | 4.7  | 0.3   |
| AACS     | 2  | 22.1 | 9.5  | 12.6 | -3.1  |
| KIAA0141 | 0  | 7.7  | 3.3  | 4.4  | -1.0  |
| HSPB11   | 7  | 15.4 | 1.9  | 13.5 | -11.6 |
| PHLPP1   | 2  | 11.7 | 3.4  | 8.2  | -4.8  |

|          |   |       |       |      |       |
|----------|---|-------|-------|------|-------|
| ATP8B1   | 0 | 7.5   | 2.0   | 5.5  | -3.6  |
| SMARCD3  | 0 | 5.2   | 2.6   | 2.6  | 0.0   |
| WDR70    | 1 | 10.0  | 5.1   | 4.9  | 0.2   |
| STRADB   | 0 | 8.0   | 2.6   | 5.4  | -2.7  |
| BZW1     | 1 | 91.1  | 84.7  | 6.5  | 78.2  |
| ME2      | 1 | 15.1  | 10.6  | 4.4  | 6.2   |
| C5orf22  | 1 | 12.3  | 8.3   | 4.0  | 4.4   |
| CCNT2    | 1 | 35.1  | 31.7  | 3.4  | 28.2  |
| FAM135A  | 1 | 15.1  | 9.6   | 5.5  | 4.1   |
| COBLL1   | 1 | 14.3  | 8.4   | 5.8  | 2.6   |
| DLG3     | 0 | 6.6   | 3.1   | 3.5  | -0.5  |
| TRAF5    | 1 | 7.2   | 3.7   | 3.5  | 0.1   |
| MRPL22   | 0 | 15.9  | 5.9   | 9.9  | -4.0  |
| GEMIN5   | 0 | 16.7  | 6.7   | 10.0 | -3.4  |
| NFE2L1   | 0 | 11.0  | 4.8   | 6.3  | -1.5  |
| GSK3B    | 1 | 6.7   | 3.5   | 3.1  | 0.4   |
| ITGB5    | 0 | 6.7   | 3.5   | 3.2  | 0.3   |
| ERC1     | 0 | 12.0  | 4.2   | 7.9  | -3.7  |
| XPO1     | 1 | 145.5 | 137.3 | 8.3  | 129.0 |
| RNF13    | 1 | 39.7  | 36.7  | 3.0  | 33.7  |
| PALB2    | 1 | 11.6  | 8.2   | 3.4  | 4.7   |
| LYRM2    | 1 | 21.3  | 17.6  | 3.7  | 13.9  |
| BCKDHB   | 0 | 5.9   | 2.3   | 3.7  | -1.4  |
| KAT6A    | 0 | 12.6  | 3.8   | 8.8  | -4.9  |
| ZCCHC6   | 1 | 8.0   | 5.7   | 2.3  | 3.5   |
| TNPO1    | 1 | 103.6 | 95.8  | 7.8  | 88.0  |
| PLOD1    | 0 | 10.8  | 5.5   | 5.2  | 0.3   |
| ITGAE    | 0 | 9.8   | 4.5   | 5.3  | -0.8  |
| DIS3     | 1 | 30.9  | 26.9  | 4.0  | 23.0  |
| PIBF1    | 1 | 22.5  | 17.1  | 5.4  | 11.7  |
| PDS5B    | 1 | 27.9  | 24.3  | 3.7  | 20.6  |
| OXCT1    | 0 | 8.6   | 2.3   | 6.3  | -4.0  |
| RRAGB    | 1 | 10.3  | 6.1   | 4.2  | 1.9   |
| CYLD     | 0 | 6.8   | 2.5   | 4.3  | -1.7  |
| SLC27A5  | 2 | 13.9  | 5.3   | 8.6  | -3.4  |
| ZNF446   | 2 | 19.4  | 7.0   | 12.4 | -5.4  |
| RPS5     | 0 | 11.4  | 5.4   | 6.0  | -0.5  |
| FAT1     | 1 | 10.8  | 7.7   | 3.1  | 4.6   |
| YTHDC1   | 1 | 75.5  | 71.0  | 4.5  | 66.5  |
| CHMP2B   | 1 | 11.7  | 7.7   | 3.9  | 3.8   |
| SMAP2    | 2 | 13.3  | 4.4   | 8.9  | -4.6  |
| PIIE     | 0 | 10.0  | 4.4   | 5.6  | -1.2  |
| ZMPSTE24 | 1 | 40.0  | 36.8  | 3.2  | 33.6  |
| STARD7   | 0 | 12.5  | 3.9   | 8.6  | -4.7  |
| NOA1     | 2 | 18.0  | 7.7   | 10.3 | -2.7  |
| REST     | 1 | 23.3  | 19.2  | 4.1  | 15.2  |
| SSH1     | 3 | 13.8  | 3.9   | 9.9  | -6.1  |
| GSTP1    | 0 | 9.2   | 3.3   | 5.9  | -2.6  |
| APLP2    | 0 | 7.2   | 3.6   | 3.6  | 0.0   |
| WBP11    | 7 | 18.0  | 1.8   | 16.2 | -14.4 |
| EIF3I    | 0 | 13.2  | 6.2   | 7.0  | -0.8  |
| COL16A1  | 3 | 9.6   | 3.0   | 6.6  | -3.7  |
| TXLNA    | 0 | 15.6  | 6.4   | 9.2  | -2.9  |
| NCOA1    | 1 | 8.3   | 4.9   | 3.4  | 1.5   |

|          |    |      |      |      |       |
|----------|----|------|------|------|-------|
| AGBL5    | 0  | 14.5 | 6.3  | 8.3  | -2.0  |
| KIF3C    | 3  | 14.2 | 7.6  | 6.6  | 1.0   |
| RAB10    | 1  | 14.5 | 11.4 | 3.1  | 8.2   |
| HADHA    | 0  | 9.7  | 3.7  | 5.9  | -2.2  |
| MAPRE3   | 3  | 15.5 | 4.1  | 11.4 | -7.3  |
| CAD      | 0  | 8.7  | 3.8  | 4.9  | -1.1  |
| CD59     | 3  | 20.4 | 13.8 | 6.7  | 7.1   |
| CD82     | 3  | 20.0 | 12.5 | 7.4  | 5.1   |
| BCORL1   | 11 | 14.9 | 1.0  | 13.9 | -12.9 |
| ATRX     | 1  | 48.0 | 44.1 | 3.8  | 40.3  |
| AK6      | 1  | 60.1 | 50.2 | 9.9  | 40.2  |
| MYNN     | 1  | 17.6 | 13.1 | 4.5  | 8.5   |
| MECOM    | 1  | 6.0  | 3.3  | 2.8  | 0.5   |
| SCAMP1   | 1  | 35.6 | 32.8 | 2.8  | 30.0  |
| PREP     | 0  | 9.7  | 4.0  | 5.7  | -1.6  |
| SEH1L    | 1  | 14.8 | 10.8 | 4.0  | 6.9   |
| WDFY1    | 1  | 28.5 | 25.2 | 3.3  | 22.0  |
| SLC25A24 | 1  | 10.5 | 6.7  | 3.9  | 2.8   |
| MAP3K4   | 1  | 19.5 | 14.7 | 4.7  | 10.0  |
| ABCB1    | 0  | 7.1  | 2.5  | 4.6  | -2.2  |
| AKR1B1   | 0  | 5.1  | 2.2  | 2.9  | -0.6  |
| CPNE3    | 1  | 30.5 | 26.1 | 4.4  | 21.7  |
| RRN3     | 1  | 11.7 | 7.2  | 4.5  | 2.7   |
| CTTN     | 0  | 5.8  | 1.9  | 4.0  | -2.1  |
| MTIF2    | 1  | 55.2 | 48.5 | 6.8  | 41.7  |
| DDHD2    | 6  | 30.9 | 6.0  | 24.9 | -18.9 |
| TTC39A   | 9  | 15.8 | 1.4  | 14.4 | -13.0 |
| EPS15    | 1  | 20.3 | 16.7 | 3.6  | 13.1  |
| ORC1     | 0  | 21.5 | 7.3  | 14.2 | -6.9  |
| MGST2    | 4  | 23.1 | 13.6 | 9.5  | 4.1   |
| CHERP    | 8  | 16.0 | 3.5  | 12.5 | -9.0  |
| ATG16L1  | 0  | 7.8  | 3.4  | 4.4  | -1.1  |
| USP40    | 0  | 5.4  | 1.9  | 3.5  | -1.6  |
| POMGNT1  | 0  | 15.6 | 6.6  | 9.0  | -2.4  |
| RAD54L   | 5  | 13.2 | 2.8  | 10.4 | -7.6  |
| MAST2    | 0  | 15.9 | 6.7  | 9.2  | -2.4  |
| DNAJA1   | 1  | 65.3 | 61.2 | 4.1  | 57.1  |
| B4GALT1  | 0  | 9.6  | 4.5  | 5.1  | -0.6  |
| CHMP5    | 1  | 11.0 | 7.7  | 3.3  | 4.5   |
| NFX1     | 9  | 7.8  | 0.8  | 6.9  | -6.1  |
| DIMT1    | 0  | 12.1 | 4.9  | 7.2  | -2.3  |
| IPO11    | 1  | 43.6 | 33.7 | 9.9  | 23.8  |
| EIF2AK1  | 0  | 7.3  | 2.3  | 5.0  | -2.7  |
| EPDR1    | 0  | 14.5 | 5.9  | 8.5  | -2.6  |
| SNX10    | 0  | 5.5  | 1.7  | 3.8  | -2.1  |
| SEPHS1   | 5  | 9.5  | 1.9  | 7.5  | -5.6  |
| MRPL28   | 12 | 12.3 | 2.8  | 9.6  | -6.8  |
| ITPKC    | 2  | 26.4 | 12.5 | 13.9 | -1.3  |
| RBM22    | 0  | 8.8  | 4.0  | 4.8  | -0.8  |
| TMED2    | 1  | 18.6 | 15.6 | 3.0  | 12.6  |
| ZFAND6   | 1  | 12.5 | 8.3  | 4.2  | 4.1   |
| TXLNG    | 1  | 21.8 | 16.9 | 4.8  | 12.1  |
| HUWE1    | 1  | 8.8  | 5.4  | 3.4  | 2.1   |
| ZW10     | 7  | 17.5 | 2.7  | 14.8 | -12.0 |

|           |   |       |       |      |       |
|-----------|---|-------|-------|------|-------|
| ALG9      | 0 | 10.7  | 4.8   | 5.9  | -1.1  |
| ACOX3     | 0 | 8.2   | 3.8   | 4.4  | -0.6  |
| MTMR2     | 1 | 22.2  | 18.7  | 3.5  | 15.2  |
| PPP1R15A  | 3 | 12.3  | 4.2   | 8.1  | -3.9  |
| TRIP6     | 3 | 13.7  | 5.1   | 8.6  | -3.5  |
| FTL       | 0 | 8.7   | 4.9   | 3.8  | 1.1   |
| SRRT      | 0 | 9.6   | 3.7   | 5.9  | -2.3  |
| BAX       | 0 | 7.8   | 4.2   | 3.6  | 0.6   |
| NLK       | 0 | 5.8   | 2.0   | 3.8  | -1.8  |
| PIGS      | 0 | 10.0  | 4.6   | 5.4  | -0.8  |
| ATXN7L3   | 0 | 10.8  | 5.9   | 4.9  | 1.1   |
| PGS1      | 0 | 13.3  | 6.1   | 7.3  | -1.2  |
| PSMC5     | 5 | 13.3  | 2.3   | 10.9 | -8.6  |
| UIMC1     | 1 | 17.2  | 12.0  | 5.2  | 6.7   |
| MMP2      | 1 | 13.2  | 6.5   | 6.7  | -0.2  |
| OGFOD1    | 0 | 9.4   | 4.6   | 4.8  | -0.2  |
| SH3BP2    | 0 | 6.9   | 3.1   | 3.8  | -0.6  |
| NOP14     | 8 | 15.3  | 2.3   | 12.9 | -10.6 |
| ADD1      | 0 | 9.2   | 4.1   | 5.1  | -1.0  |
| L2HGDH    | 0 | 12.9  | 4.6   | 8.3  | -3.7  |
| C14orf166 | 1 | 78.6  | 72.3  | 6.4  | 65.9  |
| GMCL1     | 1 | 11.0  | 6.9   | 4.1  | 2.8   |
| SF3B2     | 0 | 10.5  | 4.9   | 5.6  | -0.7  |
| KLHL42    | 0 | 8.8   | 4.5   | 4.3  | 0.3   |
| GNAS      | 6 | 10.0  | 1.8   | 8.1  | -6.3  |
| DNM1L     | 1 | 108.4 | 101.2 | 7.1  | 94.1  |
| PTHLH     | 0 | 6.6   | 2.6   | 4.0  | -1.4  |
| ERGIC2    | 1 | 102.6 | 96.0  | 6.6  | 89.4  |
| AURKA     | 5 | 27.4  | 15.8  | 11.6 | 4.2   |
| PIR       | 0 | 10.4  | 3.7   | 6.7  | -3.1  |
| AAMDC     | 0 | 8.4   | 3.7   | 4.7  | -0.9  |
| METTL2A   | 2 | 25.5  | 10.2  | 15.3 | -5.1  |
| ALG6      | 1 | 15.0  | 10.2  | 4.8  | 5.3   |
| CNOT3     | 0 | 15.5  | 7.3   | 8.2  | -0.9  |
| PTPN4     | 1 | 17.4  | 14.3  | 3.1  | 11.2  |
| DDX18     | 1 | 104.6 | 97.5  | 7.1  | 90.5  |
| KHSRP     | 8 | 15.4  | 3.3   | 12.1 | -8.9  |
| GNA11     | 8 | 13.4  | 2.9   | 10.5 | -7.6  |
| ASAP3     | 0 | 8.8   | 4.7   | 4.1  | 0.5   |
| EDEM2     | 0 | 12.1  | 5.1   | 7.1  | -2.0  |
| TPX2      | 5 | 33.9  | 23.0  | 10.9 | 12.2  |
| PDRG1     | 2 | 19.1  | 7.0   | 12.0 | -5.0  |
| EPB41L1   | 0 | 8.0   | 3.6   | 4.4  | -0.9  |
| DOCK9     | 1 | 17.5  | 13.0  | 4.4  | 8.6   |
| ANKRD10   | 1 | 14.7  | 11.7  | 3.0  | 8.7   |
| TGDS      | 1 | 13.9  | 8.9   | 5.0  | 3.9   |
| COQ9      | 2 | 13.1  | 5.2   | 8.0  | -2.8  |
| KIF9      | 0 | 12.2  | 5.0   | 7.2  | -2.2  |
| CRLS1     | 1 | 17.9  | 11.0  | 6.9  | 4.1   |
| PPP1R13B  | 4 | 14.4  | 3.9   | 10.5 | -6.7  |
| ATRN      | 0 | 10.0  | 4.9   | 5.1  | -0.3  |
| SMOX      | 3 | 10.4  | 3.6   | 6.9  | -3.3  |
| FKBP1A    | 3 | 10.1  | 3.9   | 6.2  | -2.4  |
| NSFL1C    | 0 | 8.9   | 2.9   | 6.0  | -3.1  |

|           |    |       |       |      |       |
|-----------|----|-------|-------|------|-------|
| ZNF343    | 0  | 12.0  | 5.2   | 6.8  | -1.6  |
| MAVS      | 0  | 11.3  | 5.3   | 6.0  | -0.7  |
| RP5-1187M | 2  | 20.0  | 8.0   | 12.1 | -4.1  |
| XRN2      | 1  | 39.4  | 35.5  | 3.9  | 31.6  |
| KIZ       | 1  | 13.4  | 7.5   | 5.9  | 1.6   |
| DYNLL1    | 0  | 6.4   | 2.6   | 3.8  | -1.2  |
| TESC      | 4  | 12.9  | 5.6   | 7.2  | -1.6  |
| SNX5      | 1  | 57.8  | 50.7  | 7.2  | 43.5  |
| RPL6      | 1  | 19.9  | 15.1  | 4.7  | 10.4  |
| MAPKAPK5  | 4  | 15.6  | 3.2   | 12.4 | -9.1  |
| ESF1      | 1  | 42.1  | 32.9  | 9.2  | 23.6  |
| RBBP9     | 0  | 10.0  | 3.6   | 6.4  | -2.8  |
| ANAPC5    | 0  | 8.5   | 3.0   | 5.4  | -2.4  |
| SLC23A2   | 0  | 8.2   | 4.4   | 3.8  | 0.6   |
| SLC8B1    | 0  | 11.1  | 4.1   | 6.9  | -2.8  |
| TMEM230   | 1  | 12.3  | 9.1   | 3.2  | 6.0   |
| KDM2B     | 0  | 11.3  | 4.9   | 6.3  | -1.4  |
| TASP1     | 0  | 11.2  | 4.3   | 6.9  | -2.6  |
| OAS1      | 0  | 9.7   | 4.0   | 5.8  | -1.8  |
| GCN1      | 4  | 11.2  | 2.8   | 8.4  | -5.6  |
| RPLP0     | 6  | 12.4  | 2.0   | 10.4 | -8.5  |
| PXN       | 3  | 20.2  | 12.3  | 7.9  | 4.4   |
| KIF16B    | 1  | 15.9  | 11.9  | 4.0  | 8.0   |
| TRMT6     | 1  | 22.5  | 16.7  | 5.8  | 10.9  |
| PEBP1     | 4  | 14.9  | 4.2   | 10.7 | -6.6  |
| BRAP      | 0  | 11.9  | 5.5   | 6.4  | -0.9  |
| ERP29     | 4  | 12.9  | 3.3   | 9.5  | -6.2  |
| FUS       | 0  | 9.0   | 3.3   | 5.7  | -2.4  |
| IGBP1     | 0  | 7.3   | 3.6   | 3.7  | 0.0   |
| FXD5      | 3  | 22.1  | 13.9  | 8.3  | 5.6   |
| ZNF302    | 1  | 12.8  | 10.3  | 2.5  | 7.8   |
| GRAMD1A   | 0  | 7.4   | 2.1   | 5.4  | -3.3  |
| CDIP1     | 12 | 16.5  | 1.7   | 14.8 | -13.1 |
| GANAB     | 0  | 9.0   | 4.9   | 4.1  | 0.9   |
| GMIP      | 8  | 25.7  | 2.6   | 23.1 | -20.5 |
| RBM41     | 1  | 12.2  | 9.0   | 3.3  | 5.7   |
| BIRC5     | 5  | 28.1  | 18.3  | 9.8  | 8.6   |
| MLF2      | 0  | 7.1   | 3.7   | 3.4  | 0.3   |
| DDX24     | 0  | 8.1   | 3.9   | 4.2  | -0.3  |
| ZBTB25    | 6  | 30.3  | 7.6   | 22.7 | -15.1 |
| NECAP1    | 0  | 7.3   | 3.6   | 3.7  | -0.1  |
| DHX32     | 0  | 9.5   | 3.5   | 6.0  | -2.4  |
| RCOR1     | 1  | 11.5  | 6.3   | 5.3  | 1.0   |
| GPATCH2L  | 1  | 13.1  | 8.9   | 4.2  | 4.7   |
| LTBP4     | 0  | 6.1   | 2.2   | 3.8  | -1.6  |
| BLVRB     | 0  | 13.5  | 5.8   | 7.7  | -1.9  |
| SLC9A1    | 0  | 17.0  | 6.7   | 10.3 | -3.5  |
| SPTLC1    | 1  | 16.4  | 13.4  | 3.0  | 10.3  |
| PAPOLA    | 1  | 108.8 | 102.9 | 5.9  | 97.0  |
| CCNK      | 0  | 7.7   | 3.7   | 4.0  | -0.4  |
| PCBP4     | 0  | 11.9  | 5.5   | 6.4  | -0.9  |
| YPEL3     | 11 | 14.6  | 1.4   | 13.2 | -11.9 |
| MRPS33    | 6  | 10.2  | 1.6   | 8.6  | -7.0  |
| NDUFB2    | 2  | 11.9  | 3.9   | 8.0  | -4.1  |

|           |    |      |      |      |       |
|-----------|----|------|------|------|-------|
| NUDC      | 0  | 13.2 | 4.6  | 8.6  | -4.0  |
| MAEA      | 8  | 12.8 | 2.7  | 10.0 | -7.3  |
| ICAM1     | 0  | 11.3 | 5.4  | 5.9  | -0.4  |
| STRN4     | 0  | 10.1 | 5.5  | 4.6  | 0.9   |
| LYZ       | 4  | 24.1 | 13.0 | 11.1 | 1.9   |
| MUL1      | 11 | 29.2 | 1.9  | 27.3 | -25.4 |
| TFAP4     | 12 | 16.9 | 1.8  | 15.0 | -13.2 |
| PDCD7     | 2  | 9.2  | 2.9  | 6.3  | -3.4  |
| SPG21     | 0  | 10.9 | 4.8  | 6.1  | -1.3  |
| DNAJB11   | 1  | 25.1 | 21.9 | 3.2  | 18.7  |
| P3H2      | 3  | 10.9 | 3.9  | 7.0  | -3.2  |
| RAB11FIP3 | 0  | 7.4  | 3.6  | 3.9  | -0.3  |
| GNPTG     | 0  | 8.3  | 4.2  | 4.1  | 0.1   |
| ZNF268    | 1  | 10.0 | 5.3  | 4.7  | 0.6   |
| GOLGA3    | 0  | 7.7  | 4.0  | 3.8  | 0.2   |
| PABPC4    | 6  | 32.4 | 11.8 | 20.6 | -8.9  |
| CERS4     | 4  | 16.2 | 5.6  | 10.5 | -4.9  |
| MCOLN1    | 8  | 21.6 | 5.6  | 16.0 | -10.4 |
| USP48     | 1  | 69.9 | 63.5 | 6.4  | 57.2  |
| EFNB1     | 0  | 12.8 | 4.8  | 8.0  | -3.2  |
| PDPR      | 0  | 12.1 | 6.9  | 5.2  | 1.7   |
| AARS      | 0  | 10.0 | 5.2  | 4.8  | 0.4   |
| GLG1      | 0  | 10.0 | 5.8  | 4.2  | 1.5   |
| KIF4A     | 5  | 14.6 | 5.6  | 8.9  | -3.3  |
| TNRC6A    | 1  | 59.8 | 54.2 | 5.6  | 48.6  |
| PLEKHG2   | 1  | 12.5 | 8.2  | 4.3  | 4.0   |
| NAT14     | 0  | 7.5  | 3.6  | 3.9  | -0.3  |
| EXOC1     | 1  | 26.6 | 22.6 | 4.1  | 18.5  |
| RBM27     | 1  | 41.1 | 34.0 | 7.1  | 26.9  |
| OSBPL8    | 1  | 37.3 | 32.9 | 4.4  | 28.5  |
| DTX2      | 0  | 8.4  | 3.4  | 5.0  | -1.6  |
| PUS7      | 1  | 21.8 | 16.5 | 5.2  | 11.3  |
| NRCAM     | 0  | 12.2 | 2.8  | 9.5  | -6.7  |
| LAMB1     | 1  | 14.5 | 10.5 | 4.0  | 6.4   |
| DLD       | 1  | 78.7 | 72.4 | 6.3  | 66.1  |
| WDR7      | 0  | 7.1  | 2.5  | 4.6  | -2.1  |
| TXNL1     | 0  | 6.0  | 2.6  | 3.4  | -0.7  |
| CMTM6     | 1  | 17.8 | 15.2 | 2.6  | 12.5  |
| ITGA6     | 0  | 6.2  | 2.0  | 4.2  | -2.1  |
| AC013461. | 1  | 12.7 | 8.2  | 4.5  | 3.7   |
| FH        | 5  | 11.5 | 3.0  | 8.5  | -5.5  |
| SEL1L3    | 0  | 12.1 | 5.2  | 6.9  | -1.7  |
| TF        | 4  | 25.6 | 16.7 | 8.9  | 7.8   |
| CDV3      | 1  | 49.5 | 46.1 | 3.4  | 42.7  |
| ALKBH5    | 0  | 11.7 | 4.8  | 6.8  | -2.0  |
| APOH      | 4  | 26.7 | 17.7 | 9.0  | 8.7   |
| SPAG7     | 0  | 10.6 | 5.2  | 5.4  | -0.2  |
| ORC6      | 5  | 14.2 | 4.1  | 10.1 | -6.0  |
| ZC3HC1    | 0  | 12.1 | 5.0  | 7.2  | -2.2  |
| TMEM101   | 2  | 22.1 | 9.2  | 12.9 | -3.7  |
| CCDC80    | 3  | 16.9 | 8.7  | 8.2  | 0.4   |
| PSME1     | 3  | 10.3 | 3.5  | 6.8  | -3.3  |
| PPP2R3C   | 1  | 28.7 | 22.6 | 6.1  | 16.5  |
| HAUS4     | 5  | 8.4  | 1.5  | 6.8  | -5.3  |

|         |    |      |      |      |       |
|---------|----|------|------|------|-------|
| OSGEP   | 0  | 6.6  | 2.2  | 4.4  | -2.2  |
| RNF31   | 0  | 6.1  | 2.9  | 3.2  | -0.3  |
| SCFD1   | 1  | 97.3 | 89.4 | 7.8  | 81.6  |
| G2E3    | 1  | 38.8 | 29.9 | 9.0  | 20.9  |
| HECTD1  | 1  | 84.5 | 78.4 | 6.2  | 72.2  |
| HNRNPC  | 0  | 14.3 | 4.2  | 10.1 | -6.0  |
| SUPT16H | 1  | 58.0 | 51.8 | 6.2  | 45.6  |
| TOX4    | 0  | 8.7  | 4.2  | 4.6  | -0.4  |
| GEMIN2  | 1  | 19.9 | 12.2 | 7.7  | 4.5   |
| TINF2   | 6  | 6.4  | 1.2  | 5.3  | -4.1  |
| TRPM7   | 1  | 35.5 | 31.9 | 3.6  | 28.3  |
| TYRO3   | 4  | 10.4 | 2.9  | 7.5  | -4.7  |
| WDR76   | 7  | 9.7  | 1.5  | 8.2  | -6.7  |
| SNAP23  | 1  | 73.2 | 62.1 | 11.1 | 51.1  |
| PHGDH   | 0  | 6.7  | 3.0  | 3.7  | -0.7  |
| EZR     | 5  | 12.4 | 2.9  | 9.5  | -6.6  |
| MYL6    | 3  | 13.2 | 5.5  | 7.8  | -2.3  |
| AGO1    | 0  | 10.1 | 5.5  | 4.6  | 0.8   |
| CLSPN   | 7  | 31.7 | 7.1  | 24.6 | -17.5 |
| RFFL    | 4  | 12.7 | 5.2  | 7.5  | -2.4  |
| UNC13D  | 0  | 5.2  | 1.9  | 3.2  | -1.3  |
| MFSD11  | 6  | 21.5 | 4.2  | 17.3 | -13.1 |
| DPYSL2  | 0  | 8.4  | 3.5  | 4.9  | -1.3  |
| TGFB2   | 3  | 18.7 | 9.5  | 9.3  | 0.2   |
| NUP50   | 1  | 13.6 | 7.7  | 5.9  | 1.8   |
| CDC45   | 5  | 20.1 | 9.2  | 10.9 | -1.7  |
| COMT    | 0  | 5.9  | 2.6  | 3.3  | -0.7  |
| ECHDC1  | 1  | 54.0 | 47.1 | 6.9  | 40.2  |
| LRRFIP2 | 1  | 16.3 | 11.3 | 5.0  | 6.3   |
| SEC22C  | 0  | 8.2  | 3.8  | 4.4  | -0.6  |
| XYLB    | 4  | 15.5 | 4.8  | 10.7 | -5.9  |
| HDAC6   | 0  | 5.8  | 2.2  | 3.6  | -1.4  |
| CDC6    | 5  | 25.1 | 9.9  | 15.2 | -5.3  |
| UPRT    | 0  | 8.2  | 3.0  | 5.2  | -2.2  |
| CDC23   | 7  | 16.1 | 1.8  | 14.3 | -12.5 |
| AAAS    | 0  | 16.2 | 6.8  | 9.4  | -2.6  |
| CBX5    | 1  | 15.7 | 12.0 | 3.7  | 8.3   |
| SUCO    | 1  | 21.1 | 18.6 | 2.5  | 16.1  |
| MSH2    | 1  | 65.3 | 54.6 | 10.7 | 44.0  |
| MAP3K1  | 0  | 5.7  | 1.8  | 3.9  | -2.2  |
| DHPS    | 8  | 15.5 | 5.5  | 10.0 | -4.5  |
| HOOK2   | 8  | 7.4  | 1.1  | 6.3  | -5.1  |
| ARCN1   | 1  | 26.4 | 22.6 | 3.8  | 18.8  |
| TMEM38B | 1  | 18.6 | 12.6 | 6.1  | 6.5   |
| PSMD5   | 1  | 10.4 | 7.1  | 3.4  | 3.7   |
| NUP188  | 10 | 13.5 | 1.6  | 11.9 | -10.3 |
| CRAT    | 10 | 15.0 | 1.7  | 13.3 | -11.7 |
| NANS    | 10 | 15.7 | 3.6  | 12.1 | -8.5  |
| TBC1D2  | 3  | 10.8 | 3.4  | 7.4  | -4.0  |
| CWF19L1 | 5  | 16.1 | 3.2  | 12.9 | -9.6  |
| SEMA4G  | 4  | 26.5 | 13.7 | 12.8 | 0.8   |
| BTAF1   | 1  | 33.1 | 29.6 | 3.4  | 26.2  |
| IKZF5   | 1  | 13.2 | 9.7  | 3.5  | 6.3   |
| BAMBI   | 4  | 7.5  | 2.3  | 5.2  | -2.9  |



|          |    |       |       |      |       |
|----------|----|-------|-------|------|-------|
| WAC      | 1  | 71.6  | 67.7  | 3.9  | 63.9  |
| CREM     | 1  | 6.1   | 3.4   | 2.6  | 0.8   |
| NUBP2    | 12 | 21.1  | 4.5   | 16.7 | -12.2 |
| FKBP5    | 0  | 7.6   | 2.6   | 4.9  | -2.3  |
| SRPK1    | 1  | 48.8  | 42.3  | 6.5  | 35.9  |
| BRPF3    | 0  | 10.3  | 5.2   | 5.1  | 0.1   |
| MRPS18A  | 11 | 29.9  | 2.1   | 27.8 | -25.7 |
| TMEM14A  | 0  | 7.9   | 2.9   | 5.0  | -2.0  |
| EFHC1    | 0  | 9.5   | 3.4   | 6.1  | -2.6  |
| HSP90AB1 | 5  | 8.6   | 1.6   | 7.0  | -5.5  |
| CDC5L    | 1  | 36.2  | 29.9  | 6.3  | 23.6  |
| ITPR3    | 3  | 20.0  | 7.9   | 12.1 | -4.2  |
| DSP      | 4  | 12.9  | 5.1   | 7.8  | -2.7  |
| SIRT1    | 1  | 24.7  | 18.6  | 6.1  | 12.5  |
| HNRNPH3  | 1  | 110.8 | 102.1 | 8.7  | 93.4  |
| IFT74    | 1  | 9.3   | 6.2   | 3.1  | 3.1   |
| ABL1     | 10 | 17.2  | 3.1   | 14.1 | -11.1 |
| ACOT7    | 0  | 12.8  | 5.1   | 7.8  | -2.7  |
| SH3GLB1  | 1  | 29.7  | 24.7  | 5.1  | 19.6  |
| CDC7     | 1  | 34.4  | 26.5  | 7.8  | 18.7  |
| SCD      | 4  | 8.4   | 2.7   | 5.6  | -2.9  |
| TMED1    | 2  | 14.0  | 3.8   | 10.2 | -6.5  |
| ABLIM1   | 0  | 6.8   | 1.9   | 4.9  | -3.0  |
| ERMP1    | 0  | 7.3   | 3.1   | 4.2  | -1.1  |
| RAB18    | 1  | 89.8  | 82.1  | 7.7  | 74.5  |
| NRP1     | 3  | 14.3  | 6.4   | 7.9  | -1.5  |
| PRTFDC1  | 0  | 4.8   | 1.8   | 3.0  | -1.2  |
| TSPAN15  | 0  | 10.6  | 4.4   | 6.2  | -1.8  |
| H2AFY2   | 0  | 8.9   | 4.3   | 4.6  | -0.3  |
| FAM21A   | 0  | 6.5   | 2.9   | 3.5  | -0.6  |
| MZF1     | 0  | 13.1  | 6.2   | 6.9  | -0.7  |
| OCEL1    | 2  | 14.8  | 4.6   | 10.2 | -5.6  |
| MYO9B    | 3  | 12.4  | 3.6   | 8.8  | -5.2  |
| PSMD8    | 0  | 9.5   | 4.4   | 5.1  | -0.7  |
| FBXL19   | 11 | 21.4  | 5.1   | 16.2 | -11.1 |
| HSD3B7   | 0  | 20.5  | 6.8   | 13.7 | -6.9  |
| SETD1A   | 11 | 32.3  | 5.3   | 27.1 | -21.8 |
| BCL7C    | 11 | 31.4  | 4.4   | 27.0 | -22.5 |
| CIRBP    | 8  | 10.7  | 2.1   | 8.6  | -6.5  |
| ATP5D    | 8  | 19.2  | 5.2   | 14.0 | -8.8  |
| HNRNPM   | 1  | 37.4  | 23.4  | 14.0 | 9.5   |
| NDUFB7   | 8  | 27.7  | 10.1  | 17.5 | -7.4  |
| TECR     | 8  | 13.9  | 4.6   | 9.3  | -4.7  |
| TIMM13   | 8  | 17.1  | 3.3   | 13.8 | -10.5 |
| CDC34    | 0  | 13.5  | 5.0   | 8.5  | -3.5  |
| MTAP     | 0  | 4.6   | 1.9   | 2.7  | -0.9  |
| CEP170B  | 2  | 24.3  | 9.9   | 14.4 | -4.4  |
| POLR2E   | 8  | 15.0  | 4.6   | 10.4 | -5.8  |
| POLRMT   | 8  | 15.5  | 2.8   | 12.8 | -10.0 |
| RASSF7   | 4  | 19.5  | 4.6   | 14.8 | -10.2 |
| GADD45B  | 3  | 16.6  | 8.5   | 8.0  | 0.5   |
| MKNK2    | 0  | 8.2   | 3.5   | 4.8  | -1.3  |
| ARVCF    | 0  | 14.3  | 6.0   | 8.2  | -2.2  |
| TRMT2A   | 0  | 10.2  | 4.3   | 5.9  | -1.6  |

|          |   |      |      |      |       |
|----------|---|------|------|------|-------|
| RANBP1   | 5 | 19.0 | 6.4  | 12.6 | -6.2  |
| ZDHC8    | 0 | 9.8  | 4.1  | 5.7  | -1.6  |
| KLHL22   | 0 | 11.9 | 5.2  | 6.7  | -1.5  |
| MED15    | 3 | 21.2 | 10.9 | 10.3 | 0.6   |
| SNAP29   | 0 | 6.2  | 2.7  | 3.5  | -0.9  |
| CRKL     | 0 | 11.6 | 5.0  | 6.6  | -1.6  |
| LZTR1    | 0 | 7.7  | 3.8  | 3.9  | -0.1  |
| SMARCB1  | 6 | 14.2 | 2.4  | 11.8 | -9.4  |
| BCL2L13  | 3 | 10.1 | 3.9  | 6.1  | -2.2  |
| DDT      | 5 | 9.8  | 1.8  | 8.0  | -6.2  |
| CABIN1   | 0 | 12.9 | 5.6  | 7.3  | -1.7  |
| TBC1D10A | 3 | 21.3 | 6.5  | 14.8 | -8.3  |
| SF3A1    | 0 | 12.5 | 5.4  | 7.1  | -1.7  |
| RNF215   | 3 | 13.5 | 4.0  | 9.5  | -5.5  |
| SEC14L2  | 3 | 22.2 | 10.8 | 11.4 | -0.6  |
| SPECC1L  | 0 | 13.5 | 4.8  | 8.7  | -3.9  |
| PPIL2    | 0 | 13.6 | 5.1  | 8.4  | -3.3  |
| SNRPD3   | 1 | 20.4 | 13.4 | 7.0  | 6.3   |
| PES1     | 0 | 17.8 | 7.2  | 10.6 | -3.4  |
| MAPK1    | 1 | 14.9 | 9.1  | 5.8  | 3.4   |
| GGT1     | 4 | 9.5  | 3.1  | 6.4  | -3.3  |
| PPM1F    | 0 | 12.3 | 5.2  | 7.1  | -1.8  |
| TOP3B    | 8 | 16.5 | 2.4  | 14.2 | -11.8 |
| DGCR14   | 2 | 28.0 | 12.6 | 15.3 | -2.7  |
| CARD10   | 0 | 12.9 | 4.7  | 8.2  | -3.5  |
| SLC25A1  | 4 | 16.0 | 4.3  | 11.8 | -7.5  |
| GGA1     | 8 | 14.9 | 2.1  | 12.8 | -10.7 |
| HIRA     | 2 | 20.0 | 5.8  | 14.2 | -8.4  |
| SH3BP1   | 0 | 6.7  | 3.1  | 3.6  | -0.5  |
| LGALS1   | 3 | 10.1 | 4.7  | 5.4  | -0.7  |
| HPS4     | 0 | 9.8  | 4.5  | 5.4  | -0.9  |
| SRRD     | 0 | 10.6 | 4.7  | 5.9  | -1.2  |
| PATZ1    | 2 | 23.4 | 7.8  | 15.5 | -7.7  |
| TRIOBP   | 3 | 21.6 | 10.4 | 11.1 | -0.7  |
| TFIP11   | 0 | 9.1  | 4.5  | 4.6  | 0.0   |
| GCAT     | 2 | 17.9 | 7.5  | 10.4 | -2.8  |
| ANKRD54  | 2 | 17.2 | 5.7  | 11.5 | -5.8  |
| EIF3L    | 1 | 22.1 | 14.0 | 8.1  | 5.9   |
| SNU13    | 6 | 14.1 | 2.8  | 11.3 | -8.5  |
| MICALL1  | 3 | 11.4 | 4.3  | 7.0  | -2.7  |
| POLR2F   | 0 | 15.8 | 6.5  | 9.3  | -2.8  |
| CCDC134  | 2 | 20.7 | 8.4  | 12.3 | -3.9  |
| DEPDC5   | 0 | 6.9  | 2.0  | 4.8  | -2.8  |
| PICK1    | 2 | 19.7 | 7.0  | 12.7 | -5.7  |
| TTC28    | 0 | 10.1 | 5.2  | 4.9  | 0.3   |
| CENPM    | 5 | 21.4 | 8.0  | 13.4 | -5.3  |
| KDEL3    | 0 | 6.4  | 3.1  | 3.2  | -0.1  |
| DDX17    | 1 | 22.0 | 17.2 | 4.8  | 12.4  |
| TCF20    | 0 | 11.1 | 5.5  | 5.6  | -0.1  |
| HSCB     | 0 | 9.2  | 4.0  | 5.2  | -1.2  |
| CBY1     | 0 | 15.4 | 6.5  | 8.8  | -2.3  |
| TOMM22   | 5 | 17.4 | 3.3  | 14.2 | -10.9 |
| XPB1     | 4 | 16.3 | 7.0  | 9.3  | -2.3  |
| RTCB     | 0 | 11.9 | 5.2  | 6.7  | -1.5  |

|          |   |      |      |      |       |
|----------|---|------|------|------|-------|
| JOSD1    | 0 | 13.7 | 5.6  | 8.1  | -2.4  |
| FBX07    | 0 | 10.7 | 5.0  | 5.7  | -0.7  |
| GTPBP1   | 0 | 17.6 | 7.6  | 10.0 | -2.4  |
| POLDIP3  | 8 | 15.8 | 2.0  | 13.8 | -11.9 |
| TIMP3    | 0 | 5.9  | 2.8  | 3.1  | -0.3  |
| PPP6R2   | 4 | 18.4 | 4.9  | 13.5 | -8.7  |
| SBF1     | 2 | 17.6 | 6.0  | 11.6 | -5.5  |
| SUN2     | 3 | 11.3 | 3.7  | 7.6  | -3.9  |
| CYB5R3   | 3 | 12.7 | 4.0  | 8.7  | -4.6  |
| DNAL4    | 2 | 28.6 | 9.3  | 19.3 | -10.0 |
| LMF2     | 3 | 17.9 | 4.9  | 13.0 | -8.2  |
| RHBDD3   | 2 | 16.7 | 5.3  | 11.4 | -6.2  |
| PACSIN2  | 0 | 10.6 | 4.6  | 6.1  | -1.5  |
| AP1B1    | 2 | 20.6 | 6.1  | 14.5 | -8.3  |
| HMGXB4   | 0 | 13.0 | 4.5  | 8.5  | -4.0  |
| TOM1     | 4 | 13.6 | 3.6  | 10.0 | -6.5  |
| CHKB     | 0 | 7.6  | 3.9  | 3.7  | 0.2   |
| HMOX1    | 0 | 7.7  | 2.9  | 4.7  | -1.8  |
| MCAT     | 2 | 36.2 | 17.8 | 18.4 | -0.6  |
| THOC5    | 0 | 11.9 | 5.6  | 6.2  | -0.6  |
| MCM5     | 5 | 27.0 | 18.3 | 8.8  | 9.5   |
| ARSA     | 0 | 18.9 | 8.2  | 10.6 | -2.4  |
| TSPO     | 3 | 19.3 | 8.7  | 10.6 | -1.9  |
| TTLL12   | 0 | 15.9 | 5.8  | 10.1 | -4.3  |
| PDGFB    | 3 | 9.9  | 4.8  | 5.1  | -0.4  |
| RPL3     | 0 | 13.8 | 6.5  | 7.3  | -0.8  |
| ZMAT5    | 2 | 15.9 | 5.7  | 10.1 | -4.4  |
| RBFOX2   | 3 | 17.0 | 4.6  | 12.4 | -7.8  |
| SYNGR1   | 0 | 7.0  | 3.7  | 3.4  | 0.3   |
| TAB1     | 0 | 8.6  | 4.1  | 4.5  | -0.4  |
| ASCC2    | 0 | 7.2  | 3.0  | 4.2  | -1.3  |
| MTMR3    | 0 | 14.2 | 7.4  | 6.7  | 0.7   |
| MIEF1    | 0 | 15.9 | 6.7  | 9.2  | -2.5  |
| APOL1    | 3 | 17.9 | 10.0 | 7.9  | 2.1   |
| PNPLA3   | 0 | 9.9  | 4.3  | 5.7  | -1.4  |
| MYH9     | 3 | 29.0 | 21.2 | 7.8  | 13.4  |
| SAMM50   | 0 | 10.8 | 4.6  | 6.1  | -1.5  |
| TXN2     | 0 | 13.9 | 5.9  | 8.0  | -2.0  |
| FOXRED2  | 0 | 12.3 | 5.4  | 6.9  | -1.6  |
| EIF3D    | 0 | 11.6 | 4.8  | 6.8  | -2.0  |
| TNRC6B   | 0 | 7.9  | 4.1  | 3.8  | 0.2   |
| SGSM3    | 0 | 9.2  | 5.0  | 4.2  | 0.9   |
| IFT27    | 3 | 13.0 | 4.5  | 8.5  | -3.9  |
| KIAA0930 | 0 | 8.6  | 4.1  | 4.5  | -0.4  |
| SLC25A17 | 0 | 8.9  | 3.4  | 5.5  | -2.2  |
| FAM118A  | 0 | 5.4  | 2.3  | 3.1  | -0.8  |
| KCTD17   | 0 | 10.9 | 5.3  | 5.5  | -0.2  |
| ST13     | 1 | 35.8 | 29.9 | 5.8  | 24.1  |
| RBX1     | 0 | 11.3 | 3.9  | 7.4  | -3.5  |
| EP300    | 1 | 20.3 | 11.8 | 8.5  | 3.4   |
| L3MBTL2  | 2 | 26.0 | 11.7 | 14.3 | -2.6  |
| RANGAP1  | 0 | 19.3 | 6.5  | 12.8 | -6.3  |
| ZC3H7B   | 0 | 19.1 | 7.3  | 11.8 | -4.5  |
| PHF5A    | 5 | 15.7 | 2.9  | 12.8 | -10.0 |

|           |   |       |      |      |       |
|-----------|---|-------|------|------|-------|
| ACO2      | 2 | 16.1  | 5.6  | 10.6 | -5.0  |
| POLR3H    | 0 | 11.8  | 5.5  | 6.3  | -0.8  |
| TRMU      | 0 | 10.6  | 4.4  | 6.1  | -1.7  |
| PMM1      | 0 | 7.0   | 3.8  | 3.2  | 0.6   |
| DESI1     | 0 | 9.6   | 3.9  | 5.7  | -1.8  |
| CERK      | 0 | 8.6   | 3.9  | 4.7  | -0.8  |
| BRD1      | 0 | 12.0  | 5.7  | 6.3  | -0.6  |
| ZBED4     | 0 | 13.1  | 6.3  | 6.9  | -0.6  |
| HDAC10    | 2 | 20.4  | 7.3  | 13.1 | -5.7  |
| ABHD4     | 6 | 8.3   | 1.4  | 7.0  | -5.6  |
| KHNYN     | 0 | 6.6   | 3.6  | 3.1  | 0.5   |
| FKBP3     | 1 | 47.5  | 40.7 | 6.7  | 34.0  |
| SDR39U1   | 0 | 9.4   | 4.2  | 5.1  | -0.9  |
| RBM23     | 3 | 6.6   | 2.0  | 4.6  | -2.6  |
| PRMT5     | 6 | 26.7  | 10.3 | 16.4 | -6.1  |
| COCH      | 0 | 9.7   | 3.7  | 6.0  | -2.4  |
| POLE2     | 7 | 24.3  | 4.0  | 20.3 | -16.2 |
| SOS2      | 1 | 20.7  | 18.1 | 2.6  | 15.5  |
| CDKL1     | 0 | 6.5   | 2.3  | 4.2  | -1.8  |
| NIN       | 1 | 21.0  | 15.4 | 5.6  | 9.8   |
| PYGL      | 0 | 8.6   | 3.0  | 5.6  | -2.7  |
| PSMC6     | 1 | 89.9  | 84.5 | 5.4  | 79.2  |
| GNPNAT1   | 6 | 36.9  | 4.4  | 32.4 | -28.0 |
| CDKN3     | 7 | 29.7  | 5.9  | 23.8 | -17.9 |
| CNIH1     | 1 | 19.4  | 15.7 | 3.7  | 12.0  |
| CGRRF1    | 6 | 28.3  | 3.8  | 24.5 | -20.7 |
| ATP6V1D   | 1 | 34.3  | 28.4 | 5.9  | 22.5  |
| C14orf105 | 0 | 7.5   | 2.2  | 5.3  | -3.1  |
| PLEK2     | 0 | 6.5   | 2.6  | 3.8  | -1.2  |
| PIGH      | 0 | 9.6   | 3.1  | 6.5  | -3.4  |
| PSMA3     | 1 | 106.1 | 98.1 | 8.1  | 90.0  |
| VTI1B     | 6 | 27.4  | 4.0  | 23.5 | -19.5 |
| TIMM9     | 1 | 40.6  | 31.5 | 9.1  | 22.4  |
| GSTZ1     | 0 | 7.9   | 3.2  | 4.6  | -1.4  |
| KIAA0586  | 1 | 16.2  | 10.9 | 5.3  | 5.5   |
| AHSA1     | 6 | 28.2  | 7.3  | 20.9 | -13.5 |
| DAAM1     | 1 | 18.6  | 15.5 | 3.1  | 12.4  |
| SPTLC2    | 1 | 11.2  | 6.4  | 4.8  | 1.6   |
| RIN3      | 3 | 11.7  | 3.5  | 8.2  | -4.7  |
| LGMN      | 0 | 5.0   | 2.2  | 2.7  | -0.5  |
| ALKBH1    | 0 | 14.4  | 6.2  | 8.1  | -1.9  |
| SNW1      | 1 | 105.8 | 98.3 | 7.5  | 90.8  |
| ITPK1     | 0 | 8.4   | 3.3  | 5.1  | -1.9  |
| DHRS7     | 4 | 7.0   | 1.8  | 5.2  | -3.3  |
| PPM1A     | 1 | 30.0  | 26.3 | 3.7  | 22.6  |
| ERH       | 1 | 72.1  | 63.2 | 8.9  | 54.2  |
| HIF1A     | 1 | 45.2  | 38.0 | 7.2  | 30.8  |
| SUSD6     | 0 | 10.3  | 5.7  | 4.6  | 1.0   |
| SRSF5     | 1 | 52.6  | 49.1 | 3.5  | 45.6  |
| EIF5      | 1 | 59.1  | 54.2 | 4.9  | 49.3  |
| DICER1    | 1 | 41.8  | 36.3 | 5.5  | 30.8  |
| ZFYVE21   | 0 | 8.3   | 3.5  | 4.8  | -1.2  |
| MTHFD1    | 5 | 14.6  | 5.7  | 8.9  | -3.2  |
| ZC3H14    | 1 | 64.7  | 56.9 | 7.8  | 49.1  |

|          |    |       |       |      |       |
|----------|----|-------|-------|------|-------|
| TELO2    | 12 | 19.4  | 2.9   | 16.5 | -13.6 |
| PCNX     | 1  | 16.4  | 11.8  | 4.6  | 7.2   |
| GSKIP    | 1  | 22.6  | 19.1  | 3.5  | 15.6  |
| VRK1     | 7  | 47.7  | 7.0   | 40.7 | -33.7 |
| PSMC1    | 1  | 24.7  | 20.3  | 4.5  | 15.8  |
| PPP4R3A  | 1  | 53.3  | 48.3  | 5.0  | 43.3  |
| C14orf93 | 2  | 12.8  | 4.5   | 8.3  | -3.9  |
| PSMB5    | 0  | 11.2  | 3.9   | 7.3  | -3.4  |
| YY1      | 1  | 59.0  | 52.3  | 6.7  | 45.5  |
| ACIN1    | 1  | 10.7  | 5.7   | 5.0  | 0.7   |
| CCNB1IP1 | 0  | 12.8  | 5.1   | 7.7  | -2.6  |
| TRIP11   | 1  | 24.7  | 20.0  | 4.6  | 15.4  |
| APEX1    | 0  | 9.2   | 3.1   | 6.1  | -3.1  |
| PABPN1   | 1  | 11.1  | 5.8   | 5.4  | 0.4   |
| ARHGAP5  | 1  | 42.5  | 39.5  | 3.1  | 36.4  |
| CINP     | 2  | 10.9  | 3.3   | 7.6  | -4.3  |
| SRP54    | 1  | 111.9 | 103.8 | 8.2  | 95.6  |
| CHD8     | 1  | 13.1  | 9.7   | 3.4  | 6.4   |
| PCK2     | 0  | 10.4  | 4.0   | 6.3  | -2.3  |
| KIAA0391 | 0  | 7.7   | 3.1   | 4.7  | -1.6  |
| DCAF11   | 4  | 11.2  | 2.6   | 8.6  | -5.9  |
| PSMA6    | 0  | 7.8   | 2.4   | 5.4  | -3.0  |
| NFKBIA   | 0  | 6.8   | 2.7   | 4.0  | -1.3  |
| EMC9     | 2  | 16.7  | 7.0   | 9.7  | -2.7  |
| PSME2    | 0  | 6.7   | 2.2   | 4.4  | -2.2  |
| BRMS1L   | 1  | 20.3  | 15.4  | 4.9  | 10.5  |
| TM9SF1   | 0  | 9.4   | 4.4   | 5.0  | -0.6  |
| SEC23A   | 1  | 37.6  | 33.8  | 3.8  | 30.0  |
| GMPR2    | 6  | 21.9  | 5.0   | 16.9 | -11.9 |
| PNN      | 1  | 89.9  | 84.3  | 5.7  | 78.6  |
| RABGGTA  | 2  | 13.0  | 4.0   | 9.0  | -5.0  |
| PLTP     | 1  | 12.1  | 6.3   | 5.8  | 0.5   |
| PCIF1    | 2  | 19.8  | 6.9   | 12.9 | -6.0  |
| GSS      | 2  | 19.4  | 8.0   | 11.4 | -3.4  |
| TRPC4AP  | 0  | 12.8  | 6.2   | 6.7  | -0.5  |
| PYGB     | 3  | 12.4  | 5.0   | 7.4  | -2.5  |
| ABHD12   | 3  | 11.1  | 4.1   | 7.0  | -2.9  |
| PROCR    | 0  | 6.8   | 2.3   | 4.5  | -2.2  |
| GINS1    | 5  | 16.0  | 6.3   | 9.7  | -3.4  |
| NINL     | 0  | 8.5   | 3.2   | 5.3  | -2.1  |
| UQCC1    | 1  | 7.1   | 3.7   | 3.4  | 0.2   |
| ZMYND8   | 1  | 13.3  | 10.1  | 3.2  | 6.9   |
| SGK2     | 4  | 18.1  | 7.5   | 10.6 | -3.1  |
| IFT52    | 6  | 26.0  | 3.5   | 22.5 | -18.9 |
| MYBL2    | 5  | 25.9  | 15.5  | 10.3 | 5.2   |
| HNF4A    | 4  | 31.3  | 20.2  | 11.1 | 9.2   |
| NDRG3    | 0  | 8.3   | 3.9   | 4.4  | -0.5  |
| C20orf24 | 4  | 20.6  | 6.0   | 14.6 | -8.5  |
| PABPC1L  | 1  | 7.9   | 5.0   | 2.9  | 2.1   |
| STK4     | 1  | 19.1  | 13.3  | 5.8  | 7.4   |
| ADNP     | 1  | 27.8  | 23.8  | 4.0  | 19.8  |
| PFDN4    | 1  | 26.2  | 20.4  | 5.8  | 14.5  |
| CSTF1    | 1  | 25.7  | 16.8  | 8.9  | 7.8   |
| RAE1     | 0  | 14.1  | 4.9   | 9.2  | -4.3  |

|          |   |      |      |      |       |
|----------|---|------|------|------|-------|
| TPD52L2  | 0 | 10.0 | 4.4  | 5.6  | -1.2  |
| DNAJC5   | 2 | 23.3 | 9.5  | 13.8 | -4.4  |
| NELFCD   | 0 | 14.6 | 5.9  | 8.7  | -2.7  |
| CTSZ     | 0 | 10.5 | 4.6  | 5.9  | -1.4  |
| PRPF6    | 2 | 18.1 | 7.0  | 11.1 | -4.1  |
| PRELID3B | 1 | 38.5 | 33.6 | 4.8  | 28.8  |
| MTG2     | 2 | 16.1 | 6.4  | 9.7  | -3.3  |
| PSMA7    | 0 | 11.9 | 4.4  | 7.5  | -3.1  |
| MRGBP    | 2 | 18.7 | 7.0  | 11.7 | -4.7  |
| TCFL5    | 0 | 10.3 | 3.7  | 6.6  | -2.9  |
| DIDO1    | 0 | 12.6 | 6.3  | 6.3  | -0.1  |
| GID8     | 0 | 13.0 | 6.4  | 6.6  | -0.1  |
| SLC17A9  | 4 | 15.0 | 5.7  | 9.2  | -3.5  |
| ARFGAP1  | 0 | 9.9  | 5.1  | 4.9  | 0.2   |
| EEF1A2   | 0 | 7.6  | 2.9  | 4.7  | -1.8  |
| GMEB2    | 2 | 45.3 | 22.8 | 22.4 | 0.4   |
| C20orf27 | 5 | 16.6 | 4.1  | 12.4 | -8.3  |
| CDC25B   | 3 | 11.8 | 5.1  | 6.7  | -1.5  |
| RNF24    | 0 | 9.4  | 4.5  | 4.9  | -0.4  |
| ARFRP1   | 2 | 14.5 | 4.9  | 9.6  | -4.7  |
| NDUF50   | 6 | 14.5 | 2.5  | 12.0 | -9.5  |
| TRIB3    | 0 | 10.1 | 3.9  | 6.2  | -2.3  |
| CSNK2A1  | 1 | 13.3 | 8.8  | 4.5  | 4.3   |
| CDS2     | 0 | 7.8  | 3.7  | 4.0  | -0.3  |
| HM13     | 0 | 12.0 | 5.1  | 6.8  | -1.7  |
| SEC23B   | 1 | 8.5  | 4.1  | 4.4  | -0.3  |
| MYL9     | 0 | 7.6  | 2.4  | 5.2  | -2.8  |
| TM9SF4   | 0 | 10.6 | 5.7  | 5.0  | 0.7   |
| CRNKL1   | 1 | 34.8 | 28.4 | 6.4  | 22.0  |
| POFUT1   | 0 | 8.8  | 4.9  | 3.9  | 1.0   |
| SAMHD1   | 0 | 5.0  | 2.0  | 3.0  | -1.0  |
| KIF3B    | 1 | 8.4  | 5.2  | 3.2  | 2.0   |
| NOP56    | 5 | 20.9 | 3.6  | 17.3 | -13.6 |
| MANBAL   | 0 | 12.6 | 4.9  | 7.7  | -2.7  |
| IDH3B    | 0 | 12.1 | 5.0  | 7.2  | -2.2  |
| MAPRE1   | 1 | 29.4 | 23.2 | 6.2  | 16.9  |
| JAG1     | 0 | 8.1  | 3.6  | 4.6  | -1.0  |
| CDK5RAP1 | 6 | 17.4 | 2.8  | 14.7 | -11.9 |
| SNTA1    | 0 | 14.7 | 6.7  | 8.0  | -1.3  |
| TTI1     | 0 | 13.8 | 5.8  | 8.0  | -2.1  |
| E2F1     | 5 | 18.9 | 6.1  | 12.8 | -6.7  |
| RPRD1B   | 0 | 13.4 | 4.2  | 9.2  | -5.0  |
| PXMP4    | 2 | 11.7 | 3.8  | 7.9  | -4.2  |
| CHMP4B   | 3 | 17.5 | 6.6  | 10.9 | -4.3  |
| CST3     | 0 | 10.8 | 4.5  | 6.4  | -1.9  |
| ACTR5    | 2 | 25.2 | 11.0 | 14.2 | -3.1  |
| AHCY     | 5 | 23.0 | 4.7  | 18.2 | -13.5 |
| FAM83D   | 5 | 21.2 | 11.1 | 10.1 | 1.0   |
| DHX35    | 0 | 17.7 | 7.4  | 10.3 | -2.9  |
| DNTTIP1  | 0 | 12.6 | 5.2  | 7.5  | -2.3  |
| MAP1LC3A | 0 | 14.1 | 5.3  | 8.8  | -3.5  |
| PIGU     | 2 | 20.2 | 6.5  | 13.7 | -7.2  |
| ACOT8    | 2 | 25.0 | 11.4 | 13.6 | -2.2  |
| APMAP    | 0 | 7.1  | 3.7  | 3.4  | 0.3   |

|          |   |      |      |      |       |
|----------|---|------|------|------|-------|
| ZNF516   | 0 | 6.1  | 2.7  | 3.5  | -0.8  |
| ADNP2    | 0 | 6.0  | 2.9  | 3.0  | -0.1  |
| RBFA     | 0 | 12.7 | 5.4  | 7.3  | -1.9  |
| USP14    | 7 | 8.8  | 0.9  | 7.9  | -7.0  |
| VAPA     | 1 | 9.0  | 5.5  | 3.5  | 2.0   |
| METTL4   | 1 | 15.5 | 11.9 | 3.6  | 8.4   |
| LPIN2    | 0 | 9.6  | 4.3  | 5.3  | -1.0  |
| SMCHD1   | 1 | 43.5 | 39.4 | 4.1  | 35.2  |
| MYL12A   | 1 | 20.4 | 14.9 | 5.5  | 9.4   |
| CEP76    | 7 | 10.8 | 1.1  | 9.7  | -8.6  |
| CEP192   | 1 | 20.5 | 16.1 | 4.3  | 11.8  |
| RNMT     | 1 | 25.1 | 22.6 | 2.5  | 20.2  |
| SMAD7    | 0 | 7.4  | 2.5  | 4.9  | -2.3  |
| LIPG     | 3 | 7.7  | 3.0  | 4.7  | -1.7  |
| POLI     | 1 | 16.2 | 12.8 | 3.4  | 9.4   |
| MIB1     | 1 | 24.3 | 20.7 | 3.6  | 17.2  |
| RBBP8    | 1 | 21.5 | 18.0 | 3.5  | 14.5  |
| RIOK3    | 1 | 18.7 | 15.5 | 3.2  | 12.3  |
| CSTF2    | 0 | 13.1 | 5.2  | 7.9  | -2.7  |
| PSMD10   | 1 | 13.2 | 8.5  | 4.7  | 3.8   |
| ATG4A    | 0 | 6.7  | 3.0  | 3.7  | -0.7  |
| TBL1X    | 0 | 5.6  | 2.5  | 3.1  | -0.6  |
| PGRMC1   | 1 | 11.4 | 7.9  | 3.5  | 4.4   |
| POLA1    | 7 | 17.1 | 2.9  | 14.1 | -11.2 |
| MID1     | 1 | 11.9 | 7.1  | 4.8  | 2.2   |
| NKAP     | 0 | 10.7 | 4.1  | 6.6  | -2.4  |
| NXT2     | 1 | 7.2  | 4.3  | 2.8  | 1.5   |
| ALG13    | 1 | 26.2 | 22.8 | 3.4  | 19.4  |
| PRPS2    | 0 | 8.6  | 2.3  | 6.4  | -4.1  |
| MOSPD1   | 1 | 12.4 | 6.9  | 5.5  | 1.4   |
| AMMECR1  | 1 | 4.9  | 2.6  | 2.3  | 0.3   |
| WDR13    | 3 | 10.6 | 3.0  | 7.6  | -4.6  |
| SUV39H1  | 0 | 14.9 | 5.6  | 9.3  | -3.7  |
| SRPX     | 3 | 12.5 | 5.6  | 6.9  | -1.3  |
| XIAP     | 1 | 23.0 | 19.8 | 3.2  | 16.6  |
| STAG2    | 1 | 42.2 | 39.0 | 3.2  | 35.8  |
| ATP11C   | 1 | 14.7 | 11.7 | 3.0  | 8.8   |
| ABCD1    | 0 | 12.5 | 5.0  | 7.5  | -2.5  |
| CCDC22   | 2 | 24.3 | 9.1  | 15.2 | -6.0  |
| PLP2     | 3 | 11.6 | 4.6  | 7.0  | -2.4  |
| PLS3     | 1 | 16.9 | 14.0 | 2.9  | 11.1  |
| NAA10    | 0 | 14.8 | 6.1  | 8.7  | -2.6  |
| ELF4     | 0 | 7.2  | 3.2  | 3.9  | -0.7  |
| SMARCA1  | 1 | 16.5 | 12.6 | 3.9  | 8.7   |
| ASB9     | 0 | 8.8  | 3.5  | 5.3  | -1.9  |
| RBBP7    | 1 | 28.5 | 24.8 | 3.7  | 21.2  |
| SLC25A14 | 0 | 7.8  | 3.3  | 4.5  | -1.1  |
| FMR1     | 1 | 33.7 | 29.7 | 3.9  | 25.8  |
| PIM2     | 2 | 17.0 | 6.7  | 10.3 | -3.6  |
| SLC35A2  | 0 | 9.7  | 4.8  | 4.9  | -0.1  |
| PQBP1    | 0 | 9.2  | 4.3  | 4.9  | -0.6  |
| EMD      | 3 | 16.6 | 5.8  | 10.7 | -4.9  |
| TAZ      | 0 | 8.5  | 4.2  | 4.3  | -0.1  |
| PGK1     | 0 | 10.0 | 4.2  | 5.8  | -1.5  |

|          |    |      |      |      |       |
|----------|----|------|------|------|-------|
| MAGT1    | 0  | 7.8  | 2.8  | 5.0  | -2.2  |
| SMS      | 7  | 12.6 | 1.2  | 11.4 | -10.2 |
| UBL4A    | 9  | 19.8 | 1.5  | 18.4 | -16.9 |
| CD99L2   | 3  | 22.7 | 10.9 | 11.8 | -1.0  |
| EEA1     | 1  | 21.5 | 16.4 | 5.1  | 11.2  |
| RP2      | 1  | 11.7 | 7.8  | 3.9  | 3.9   |
| JADE3    | 0  | 8.1  | 2.8  | 5.3  | -2.5  |
| CDK16    | 0  | 9.1  | 4.8  | 4.3  | 0.4   |
| USP11    | 0  | 7.7  | 3.4  | 4.3  | -1.0  |
| HTATSF1  | 1  | 17.3 | 13.5 | 3.9  | 9.6   |
| TIMP1    | 0  | 5.9  | 2.3  | 3.6  | -1.3  |
| GABRE    | 0  | 6.8  | 2.5  | 4.4  | -1.9  |
| PIN4     | 1  | 18.1 | 12.3 | 5.8  | 6.6   |
| PORCN    | 3  | 13.4 | 7.5  | 5.9  | 1.6   |
| MAGED2   | 0  | 7.2  | 3.3  | 3.9  | -0.6  |
| RBM3     | 1  | 14.8 | 9.3  | 5.5  | 3.8   |
| SRPX2    | 3  | 12.4 | 4.5  | 7.9  | -3.4  |
| SYTL4    | 0  | 8.3  | 3.5  | 4.8  | -1.3  |
| CENPI    | 7  | 15.1 | 2.7  | 12.4 | -9.7  |
| PBDC1    | 0  | 6.5  | 2.2  | 4.3  | -2.2  |
| GLA      | 0  | 11.3 | 4.9  | 6.4  | -1.5  |
| ARMCX3   | 0  | 6.7  | 3.4  | 3.4  | 0.0   |
| NDFIP2   | 1  | 18.0 | 14.4 | 3.6  | 10.8  |
| FNDC3A   | 1  | 25.9 | 23.2 | 2.7  | 20.6  |
| CDADC1   | 0  | 7.5  | 3.1  | 4.5  | -1.4  |
| KLF5     | 4  | 11.1 | 3.8  | 7.2  | -3.4  |
| STK24    | 0  | 8.0  | 4.0  | 4.0  | 0.1   |
| DNAJC3   | 1  | 9.3  | 5.8  | 3.5  | 2.3   |
| UGGT2    | 1  | 15.4 | 12.4 | 3.0  | 9.4   |
| ARHGEF7  | 0  | 9.4  | 5.1  | 4.3  | 0.9   |
| PARP4    | 0  | 9.5  | 3.0  | 6.5  | -3.5  |
| SUPT20H  | 1  | 17.2 | 13.4 | 3.8  | 9.5   |
| MRPS31   | 1  | 16.0 | 9.5  | 6.6  | 2.9   |
| SLC25A15 | 0  | 13.0 | 5.2  | 7.8  | -2.6  |
| KPNA3    | 1  | 33.6 | 27.1 | 6.5  | 20.5  |
| VWA8     | 0  | 7.9  | 2.5  | 5.4  | -2.9  |
| KATNAL1  | 0  | 14.9 | 2.4  | 12.4 | -10.0 |
| INTS6    | 1  | 27.6 | 24.6 | 3.0  | 21.7  |
| TSC22D1  | 0  | 8.3  | 2.9  | 5.4  | -2.5  |
| CLN5     | 0  | 5.8  | 2.2  | 3.6  | -1.3  |
| MGRN1    | 0  | 16.8 | 6.5  | 10.3 | -3.9  |
| ZNF629   | 11 | 22.3 | 3.3  | 19.0 | -15.7 |
| TRADD    | 2  | 39.4 | 18.3 | 21.1 | -2.8  |
| HSF4     | 0  | 7.1  | 3.3  | 3.9  | -0.6  |
| MAPK3    | 11 | 8.1  | 1.3  | 6.8  | -5.5  |
| PHKB     | 1  | 8.2  | 5.0  | 3.2  | 1.8   |
| LYRM1    | 0  | 7.0  | 2.3  | 4.6  | -2.3  |
| NUTF2    | 0  | 15.6 | 6.9  | 8.8  | -1.9  |
| NUP93    | 0  | 13.2 | 5.8  | 7.5  | -1.7  |
| CENPT    | 2  | 18.1 | 6.3  | 11.8 | -5.5  |
| NFAT5    | 1  | 17.4 | 12.5 | 4.9  | 7.7   |
| LONP2    | 0  | 7.2  | 3.6  | 3.6  | 0.0   |
| N4BP1    | 1  | 16.4 | 9.7  | 6.7  | 3.0   |
| ARL2BP   | 6  | 18.1 | 5.2  | 12.9 | -7.7  |



|          |    |      |      |      |       |
|----------|----|------|------|------|-------|
| PLL      | 6  | 9.3  | 2.0  | 7.4  | -5.4  |
| DHODH    | 2  | 20.6 | 9.5  | 11.1 | -1.6  |
| CTCF     | 0  | 14.3 | 6.3  | 7.9  | -1.6  |
| ACD      | 2  | 23.4 | 9.9  | 13.5 | -3.5  |
| POLR2C   | 0  | 13.4 | 6.3  | 7.1  | -0.9  |
| MMP15    | 2  | 21.3 | 7.3  | 14.0 | -6.7  |
| USB1     | 3  | 14.1 | 4.4  | 9.7  | -5.3  |
| CYB5B    | 0  | 6.4  | 2.5  | 3.9  | -1.4  |
| NME3     | 2  | 13.1 | 4.2  | 8.9  | -4.6  |
| NDRG4    | 0  | 5.5  | 2.7  | 2.8  | -0.1  |
| PSMD7    | 0  | 10.9 | 3.7  | 7.2  | -3.5  |
| SETD6    | 2  | 10.0 | 3.6  | 6.4  | -2.8  |
| SLC38A7  | 2  | 17.0 | 5.9  | 11.1 | -5.2  |
| VAC14    | 2  | 15.6 | 6.1  | 9.4  | -3.3  |
| TANGO6   | 0  | 9.5  | 4.2  | 5.3  | -1.0  |
| COG4     | 2  | 15.6 | 6.4  | 9.2  | -2.7  |
| SLC7A6OS | 0  | 11.0 | 5.6  | 5.4  | 0.2   |
| SLC7A6   | 0  | 10.8 | 4.3  | 6.5  | -2.2  |
| PLA2G15  | 0  | 15.6 | 6.5  | 9.1  | -2.5  |
| WDR59    | 6  | 16.5 | 3.3  | 13.2 | -9.9  |
| MON1B    | 0  | 15.2 | 7.2  | 8.0  | -0.8  |
| CMC2     | 7  | 14.2 | 2.2  | 12.0 | -9.8  |
| AXIN1    | 12 | 16.6 | 3.3  | 13.4 | -10.1 |
| HCFC1R1  | 0  | 7.1  | 2.9  | 4.2  | -1.2  |
| NPRL3    | 12 | 9.9  | 2.4  | 7.5  | -5.1  |
| MPG      | 12 | 9.3  | 1.8  | 7.5  | -5.7  |
| HSDL1    | 1  | 20.6 | 12.6 | 8.0  | 4.6   |
| TAF1C    | 0  | 7.5  | 3.7  | 3.8  | -0.1  |
| NAGPA    | 12 | 21.1 | 2.0  | 19.1 | -17.0 |
| COTL1    | 0  | 5.7  | 2.4  | 3.4  | -1.0  |
| USP10    | 6  | 22.1 | 2.8  | 19.3 | -16.5 |
| TSC2     | 0  | 6.9  | 3.4  | 3.5  | -0.1  |
| ZNF500   | 11 | 14.6 | 1.2  | 13.4 | -12.2 |
| NME4     | 0  | 6.7  | 3.2  | 3.5  | -0.4  |
| ABCC1    | 3  | 10.7 | 3.1  | 7.6  | -4.4  |
| NOMO3    | 0  | 9.8  | 3.6  | 6.2  | -2.6  |
| NARFL    | 12 | 26.1 | 4.9  | 21.2 | -16.3 |
| MTHFSD   | 0  | 10.0 | 4.3  | 5.7  | -1.4  |
| CLCN7    | 0  | 11.8 | 5.5  | 6.3  | -0.9  |
| HAGHL    | 2  | 11.6 | 3.9  | 7.6  | -3.7  |
| FAM173A  | 12 | 28.7 | 3.3  | 25.4 | -22.1 |
| SLC7A5   | 0  | 6.0  | 1.8  | 4.1  | -2.3  |
| METRN    | 0  | 10.9 | 4.2  | 6.6  | -2.4  |
| FBX031   | 0  | 16.7 | 7.6  | 9.1  | -1.5  |
| STUB1    | 12 | 13.5 | 2.5  | 11.0 | -8.6  |
| NUBP1    | 0  | 10.4 | 3.4  | 7.0  | -3.6  |
| UBE2I    | 6  | 17.3 | 3.6  | 13.7 | -10.1 |
| EEF2K    | 0  | 10.5 | 3.9  | 6.6  | -2.6  |
| CAPN15   | 12 | 14.0 | 2.1  | 11.9 | -9.8  |
| PIEZO1   | 0  | 10.4 | 4.4  | 6.0  | -1.6  |
| GSPT1    | 1  | 22.6 | 16.8 | 5.8  | 11.1  |
| ZNF174   | 12 | 22.7 | 4.4  | 18.3 | -13.9 |
| CLUAP1   | 1  | 20.5 | 14.6 | 5.9  | 8.7   |
| UBFD1    | 0  | 8.8  | 4.1  | 4.7  | -0.6  |

|          |    |      |      |      |       |
|----------|----|------|------|------|-------|
| EARS2    | 12 | 12.9 | 2.1  | 10.8 | -8.8  |
| TCEB2    | 0  | 6.4  | 2.4  | 3.9  | -1.5  |
| GGA2     | 1  | 15.9 | 10.5 | 5.5  | 5.0   |
| CPPED1   | 0  | 9.8  | 3.8  | 6.1  | -2.3  |
| HMOX2    | 12 | 8.9  | 1.7  | 7.2  | -5.5  |
| DNAJA3   | 12 | 14.0 | 1.6  | 12.4 | -10.8 |
| BFAR     | 1  | 7.2  | 3.7  | 3.5  | 0.2   |
| RBL2     | 1  | 13.7 | 10.1 | 3.7  | 6.4   |
| QPRT     | 4  | 10.0 | 2.9  | 7.1  | -4.3  |
| MAZ      | 11 | 12.5 | 2.0  | 10.5 | -8.5  |
| STX4     | 11 | 14.7 | 2.7  | 12.0 | -9.3  |
| CDIPT    | 11 | 16.9 | 3.6  | 13.2 | -9.6  |
| BCKDK    | 11 | 18.7 | 4.3  | 14.4 | -10.1 |
| KAT8     | 11 | 18.2 | 4.1  | 14.1 | -10.0 |
| NOMO1    | 0  | 10.9 | 4.9  | 6.0  | -1.2  |
| CCP110   | 1  | 19.0 | 14.3 | 4.8  | 9.5   |
| C16orf62 | 0  | 6.2  | 2.3  | 3.9  | -1.6  |
| RNF40    | 11 | 11.8 | 2.7  | 9.1  | -6.4  |
| KNOP1    | 0  | 7.0  | 2.7  | 4.3  | -1.5  |
| AAGAB    | 1  | 8.0  | 4.2  | 3.8  | 0.4   |
| LACTB    | 1  | 17.2 | 9.1  | 8.1  | 1.0   |
| CSK      | 4  | 13.4 | 3.2  | 10.2 | -6.9  |
| HERC1    | 1  | 20.5 | 17.3 | 3.2  | 14.1  |
| TRIP4    | 1  | 9.6  | 6.5  | 3.1  | 3.4   |
| MTFMT    | 0  | 9.1  | 3.9  | 5.2  | -1.3  |
| RAB11A   | 1  | 14.4 | 10.5 | 3.9  | 6.6   |
| CTSH     | 0  | 12.0 | 3.8  | 8.2  | -4.4  |
| TTC23    | 4  | 8.3  | 2.7  | 5.6  | -3.0  |
| CD276    | 0  | 7.1  | 4.1  | 3.1  | 1.0   |
| FAH      | 0  | 11.6 | 5.1  | 6.5  | -1.4  |
| RPAP1    | 4  | 17.3 | 5.2  | 12.2 | -7.0  |
| HOMER2   | 0  | 6.5  | 3.3  | 3.3  | 0.0   |
| EHD4     | 0  | 11.1 | 4.0  | 7.2  | -3.2  |
| TMEM87A  | 1  | 34.4 | 30.3 | 4.1  | 26.2  |
| ZNF106   | 1  | 18.1 | 13.3 | 4.8  | 8.5   |
| DTWD1    | 1  | 12.1 | 9.3  | 2.8  | 6.5   |
| GABPB1   | 1  | 12.1 | 8.2  | 4.0  | 4.2   |
| TJP1     | 1  | 28.4 | 24.7 | 3.7  | 21.1  |
| BMF      | 0  | 10.5 | 3.4  | 7.1  | -3.7  |
| DMXL2    | 1  | 26.9 | 22.7 | 4.3  | 18.4  |
| DNAJC17  | 0  | 8.7  | 3.4  | 5.3  | -1.8  |
| EIF3J    | 1  | 80.1 | 71.7 | 8.4  | 63.3  |
| SPG11    | 1  | 21.8 | 17.7 | 4.1  | 13.6  |
| VPS18    | 2  | 21.6 | 7.0  | 14.6 | -7.6  |
| OIP5     | 5  | 15.3 | 3.3  | 12.0 | -8.6  |
| BLOC1S6  | 1  | 69.9 | 66.6 | 3.3  | 63.3  |
| CSPP1    | 1  | 14.1 | 10.7 | 3.4  | 7.4   |
| ZDHHC2   | 1  | 21.9 | 12.6 | 9.3  | 3.2   |
| BRF2     | 2  | 14.3 | 5.3  | 9.0  | -3.7  |
| TRIM35   | 2  | 14.6 | 6.0  | 8.6  | -2.7  |
| ZFAND1   | 1  | 22.4 | 18.9 | 3.5  | 15.4  |
| INTS9    | 2  | 13.8 | 5.0  | 8.9  | -3.9  |
| RIPK2    | 0  | 7.1  | 2.4  | 4.6  | -2.2  |
| NBN      | 1  | 43.3 | 40.2 | 3.2  | 37.0  |

|           |    |      |      |      |       |
|-----------|----|------|------|------|-------|
| CPQ       | 0  | 8.1  | 3.8  | 4.3  | -0.5  |
| DECR1     | 0  | 6.8  | 2.3  | 4.5  | -2.2  |
| IMPAD1    | 1  | 28.8 | 24.7 | 4.1  | 20.6  |
| LAPTM4B   | 0  | 4.5  | 1.8  | 2.7  | -0.8  |
| UBE2W     | 1  | 9.4  | 6.6  | 2.7  | 3.9   |
| POP1      | 0  | 7.2  | 2.6  | 4.6  | -2.0  |
| IKBKB     | 0  | 7.5  | 2.8  | 4.7  | -1.9  |
| STK3      | 1  | 11.8 | 8.3  | 3.4  | 4.9   |
| GDAP1     | 1  | 11.0 | 6.7  | 4.3  | 2.4   |
| RAB2A     | 1  | 19.0 | 16.4 | 2.7  | 13.7  |
| EIF3E     | 1  | 48.6 | 45.7 | 3.0  | 42.7  |
| EMC2      | 1  | 39.3 | 36.0 | 3.4  | 32.6  |
| NDRG1     | 0  | 8.6  | 4.0  | 4.6  | -0.6  |
| ZC2HC1A   | 1  | 19.2 | 14.3 | 5.0  | 9.3   |
| ARMC1     | 1  | 10.6 | 7.5  | 3.1  | 4.3   |
| SPAG1     | 0  | 4.9  | 1.4  | 3.5  | -2.0  |
| CHRA1     | 1  | 9.3  | 4.8  | 4.5  | 0.3   |
| UBR5      | 1  | 62.3 | 58.1 | 4.1  | 54.0  |
| GSDMD     | 0  | 10.0 | 4.4  | 5.7  | -1.3  |
| TSTA3     | 13 | 10.1 | 1.4  | 8.7  | -7.2  |
| PYRL      | 13 | 29.6 | 3.1  | 26.5 | -23.4 |
| EEF1D     | 13 | 6.3  | 0.6  | 5.7  | -5.1  |
| SQLE      | 1  | 7.2  | 3.8  | 3.5  | 0.3   |
| SH2D4A    | 0  | 5.1  | 2.0  | 3.1  | -1.1  |
| INTS10    | 1  | 30.7 | 24.1 | 6.6  | 17.5  |
| ERI1      | 7  | 8.3  | 0.9  | 7.4  | -6.5  |
| SLC39A14  | 4  | 9.4  | 2.5  | 6.9  | -4.5  |
| LEPROTL1  | 0  | 7.5  | 2.3  | 5.1  | -2.8  |
| DCTN6     | 1  | 15.5 | 12.6 | 2.9  | 9.8   |
| R3HCC1    | 2  | 13.2 | 4.4  | 8.8  | -4.5  |
| GSR       | 0  | 12.3 | 4.1  | 8.2  | -4.2  |
| TNFRSF10A | 0  | 9.2  | 3.7  | 5.4  | -1.7  |
| UBXN8     | 1  | 13.5 | 7.3  | 6.1  | 1.2   |
| PPP2CB    | 1  | 16.2 | 10.6 | 5.6  | 5.0   |
| ERICH1    | 0  | 5.3  | 2.5  | 2.9  | -0.4  |
| TUSC3     | 0  | 5.2  | 2.1  | 3.1  | -1.0  |
| KLHDC4    | 0  | 11.3 | 5.0  | 6.3  | -1.3  |
| MCM4      | 5  | 24.5 | 10.0 | 14.4 | -4.4  |
| KCTD9     | 1  | 9.9  | 6.3  | 3.6  | 2.7   |
| ASAH1     | 1  | 10.8 | 7.2  | 3.6  | 3.6   |
| BNIP3L    | 1  | 18.2 | 11.5 | 6.8  | 4.7   |
| MAN2B1    | 8  | 14.4 | 4.0  | 10.5 | -6.5  |
| KCNN4     | 3  | 11.3 | 5.8  | 5.5  | 0.3   |
| NUCB1     | 0  | 13.8 | 6.8  | 7.0  | -0.1  |
| GYS1      | 0  | 6.4  | 3.1  | 3.3  | -0.2  |
| ECH1      | 4  | 10.9 | 3.3  | 7.6  | -4.2  |
| HNRNPL    | 5  | 13.9 | 4.8  | 9.2  | -4.4  |
| NFKB1B    | 2  | 14.3 | 5.0  | 9.3  | -4.3  |
| SARS2     | 0  | 10.0 | 3.6  | 6.4  | -2.8  |
| SNRNP70   | 0  | 13.3 | 6.2  | 7.0  | -0.8  |
| CLPTM1    | 0  | 9.8  | 4.9  | 4.9  | -0.1  |
| RELB      | 0  | 14.0 | 5.6  | 8.4  | -2.7  |
| CLASRP    | 0  | 7.1  | 3.2  | 3.9  | -0.8  |
| LIN7B     | 2  | 11.9 | 4.4  | 7.6  | -3.2  |

|          |   |      |      |      |       |
|----------|---|------|------|------|-------|
| PPP1R37  | 0 | 16.2 | 5.8  | 10.4 | -4.6  |
| FCGRT    | 4 | 16.0 | 6.8  | 9.2  | -2.4  |
| PIH1D1   | 0 | 9.4  | 4.7  | 4.8  | -0.1  |
| ARHGEF18 | 8 | 14.9 | 3.9  | 11.0 | -7.1  |
| PPP1R13L | 3 | 16.4 | 9.2  | 7.1  | 2.1   |
| ERCC2    | 3 | 9.2  | 2.8  | 6.4  | -3.6  |
| DOT1L    | 8 | 14.0 | 4.7  | 9.3  | -4.6  |
| PLEKHJ1  | 8 | 19.0 | 6.3  | 12.7 | -6.4  |
| RNASEH2A | 5 | 25.2 | 11.4 | 13.7 | -2.3  |
| SF3A2    | 8 | 10.6 | 2.6  | 8.0  | -5.5  |
| OAZ1     | 8 | 10.7 | 1.9  | 8.8  | -6.9  |
| TRMT1    | 8 | 13.6 | 3.3  | 10.3 | -7.0  |
| STX10    | 8 | 12.5 | 1.8  | 10.7 | -8.9  |
| DMPK     | 3 | 9.5  | 3.5  | 6.0  | -2.6  |
| TBC1D17  | 0 | 11.7 | 6.5  | 5.2  | 1.3   |
| CCDC130  | 8 | 19.0 | 5.9  | 13.0 | -7.1  |
| PTOV1    | 0 | 8.6  | 5.0  | 3.6  | 1.4   |
| AES      | 6 | 8.2  | 1.5  | 6.7  | -5.1  |
| SGTA     | 8 | 32.5 | 13.0 | 19.5 | -6.5  |
| MED25    | 0 | 12.8 | 6.4  | 6.3  | 0.1   |
| SNAPC2   | 0 | 11.8 | 4.9  | 6.9  | -2.0  |
| C19orf53 | 8 | 11.1 | 3.1  | 8.0  | -4.9  |
| TIMM44   | 0 | 14.6 | 5.0  | 9.6  | -4.6  |
| CCDC61   | 2 | 22.0 | 9.5  | 12.5 | -2.9  |
| ASF1B    | 5 | 20.2 | 6.8  | 13.4 | -6.5  |
| TNNT1    | 0 | 5.6  | 2.1  | 3.5  | -1.4  |
| VRK3     | 0 | 14.7 | 6.2  | 8.5  | -2.3  |
| FAM32A   | 8 | 9.5  | 2.4  | 7.2  | -4.8  |
| PPP6R1   | 0 | 14.9 | 7.0  | 8.0  | -1.0  |
| OLFM2    | 0 | 6.7  | 3.3  | 3.4  | -0.1  |
| AKAP8    | 8 | 19.6 | 4.7  | 15.0 | -10.3 |
| ILVBL    | 8 | 20.8 | 5.3  | 15.4 | -10.1 |
| SYDE1    | 3 | 18.5 | 6.6  | 12.0 | -5.4  |
| POP4     | 0 | 7.1  | 3.0  | 4.1  | -1.1  |
| CCNE1    | 0 | 8.6  | 3.1  | 5.5  | -2.3  |
| URI1     | 1 | 37.9 | 34.6 | 3.2  | 31.4  |
| PDCD5    | 1 | 48.3 | 42.1 | 6.2  | 35.9  |
| ANKRD27  | 0 | 9.4  | 2.8  | 6.6  | -3.8  |
| RPS16    | 0 | 8.1  | 4.1  | 4.0  | 0.1   |
| TIMM50   | 5 | 14.0 | 3.3  | 10.7 | -7.4  |
| FBL      | 5 | 16.1 | 5.5  | 10.6 | -5.1  |
| DYRK1B   | 0 | 11.2 | 5.8  | 5.4  | 0.5   |
| GPI      | 0 | 9.6  | 4.0  | 5.6  | -1.5  |
| AKT2     | 0 | 9.0  | 5.0  | 4.0  | 1.0   |
| PLD3     | 0 | 11.9 | 6.5  | 5.3  | 1.2   |
| PIAS4    | 0 | 9.6  | 3.8  | 5.9  | -2.1  |
| NUMBL    | 3 | 12.6 | 3.5  | 9.2  | -5.7  |
| CCDC94   | 8 | 18.5 | 6.2  | 12.2 | -6.0  |
| TBCB     | 0 | 7.6  | 2.9  | 4.7  | -1.8  |
| POLR2I   | 6 | 9.0  | 2.3  | 6.7  | -4.5  |
| SLC1A5   | 0 | 7.6  | 2.7  | 4.9  | -2.3  |
| PRKD2    | 0 | 9.0  | 4.0  | 4.9  | -0.9  |
| APLP1    | 0 | 4.6  | 2.0  | 2.6  | -0.6  |
| CACTIN   | 8 | 33.1 | 10.1 | 23.0 | -12.9 |

|          |   |      |      |      |       |
|----------|---|------|------|------|-------|
| CCDC9    | 0 | 10.3 | 4.4  | 5.9  | -1.5  |
| HNRNPUL1 | 0 | 15.0 | 7.1  | 7.9  | -0.8  |
| FZR1     | 8 | 12.8 | 3.9  | 8.9  | -5.0  |
| BBC3     | 0 | 11.2 | 5.1  | 6.1  | -1.0  |
| TGFB1    | 3 | 10.4 | 4.1  | 6.3  | -2.3  |
| DENND3   | 0 | 7.6  | 2.0  | 5.6  | -3.6  |
| ATP5SL   | 0 | 12.6 | 5.1  | 7.4  | -2.3  |
| PLIN3    | 3 | 13.5 | 5.7  | 7.8  | -2.1  |
| MRPL4    | 8 | 30.7 | 9.2  | 21.4 | -12.2 |
| RPS19    | 0 | 7.8  | 3.3  | 4.5  | -1.2  |
| GLTSCR2  | 0 | 7.5  | 3.7  | 3.8  | -0.2  |
| ETFB     | 4 | 13.5 | 5.1  | 8.4  | -3.3  |
| BABAM1   | 0 | 9.9  | 3.0  | 6.9  | -3.9  |
| TYK2     | 8 | 8.5  | 1.7  | 6.8  | -5.1  |
| CDC37    | 8 | 17.9 | 6.9  | 11.0 | -4.2  |
| NAPA     | 0 | 6.1  | 2.8  | 3.3  | -0.5  |
| RABAC1   | 0 | 10.0 | 5.1  | 4.8  | 0.3   |
| PTPRS    | 0 | 6.4  | 3.4  | 3.0  | 0.4   |
| MEGF8    | 0 | 9.5  | 4.7  | 4.8  | -0.1  |
| KDELRL1  | 0 | 10.5 | 5.5  | 5.0  | 0.5   |
| CYTH2    | 0 | 14.0 | 6.7  | 7.3  | -0.6  |
| GRWD1    | 2 | 18.4 | 5.6  | 12.9 | -7.3  |
| CARD8    | 1 | 9.6  | 6.7  | 2.9  | 3.8   |
| LIG1     | 5 | 14.3 | 5.9  | 8.4  | -2.5  |
| PLA2G4C  | 3 | 9.1  | 3.0  | 6.1  | -3.2  |
| DBP      | 0 | 6.5  | 3.4  | 3.1  | 0.3   |
| TMEM205  | 0 | 12.9 | 5.2  | 7.7  | -2.5  |
| PLPPR2   | 0 | 15.3 | 6.9  | 8.4  | -1.5  |
| BCAT2    | 0 | 9.7  | 3.8  | 5.9  | -2.2  |
| MIER2    | 8 | 14.4 | 2.6  | 11.9 | -9.3  |
| PLEKHA4  | 0 | 12.0 | 5.0  | 7.1  | -2.1  |
| PPP2R1A  | 0 | 8.7  | 3.1  | 5.6  | -2.5  |
| TNPO2    | 8 | 14.3 | 4.6  | 9.6  | -5.0  |
| WDR83OS  | 6 | 12.3 | 3.8  | 8.5  | -4.8  |
| GCDH     | 8 | 25.9 | 5.3  | 20.6 | -15.3 |
| DNASE2   | 0 | 9.8  | 4.9  | 4.9  | 0.1   |
| LENG1    | 2 | 22.0 | 10.2 | 11.8 | -1.6  |
| PRPF31   | 0 | 14.8 | 7.8  | 7.0  | 0.8   |
| TFPT     | 0 | 9.3  | 4.1  | 5.2  | -1.0  |
| RPL18A   | 8 | 15.1 | 4.5  | 10.6 | -6.1  |
| ARRDC2   | 2 | 20.3 | 6.2  | 14.1 | -8.0  |
| PIK3R2   | 8 | 14.3 | 3.5  | 10.8 | -7.3  |
| ISYNA1   | 0 | 8.1  | 4.2  | 3.9  | 0.3   |
| ELL      | 8 | 23.7 | 2.5  | 21.1 | -18.6 |
| COPE     | 8 | 15.9 | 3.6  | 12.4 | -8.8  |
| DDX49    | 0 | 11.9 | 5.0  | 7.0  | -2.0  |
| ARMC6    | 8 | 17.2 | 2.2  | 15.0 | -12.8 |
| TMEM147  | 0 | 13.9 | 5.1  | 8.9  | -3.8  |
| USF2     | 0 | 7.5  | 3.1  | 4.4  | -1.2  |
| LSR      | 4 | 16.6 | 7.3  | 9.2  | -1.9  |
| KXD1     | 8 | 12.8 | 3.2  | 9.7  | -6.5  |
| FKBP8    | 8 | 22.8 | 4.4  | 18.3 | -13.9 |
| SUGP1    | 8 | 10.2 | 2.2  | 8.0  | -5.9  |
| SCN1B    | 0 | 9.2  | 4.2  | 5.0  | -0.9  |

|         |   |      |      |      |       |
|---------|---|------|------|------|-------|
| ERF     | 0 | 6.5  | 3.4  | 3.1  | 0.4   |
| GSK3A   | 0 | 15.0 | 6.6  | 8.4  | -1.8  |
| ATP13A1 | 8 | 14.5 | 3.0  | 11.5 | -8.6  |
| ZNF574  | 2 | 27.0 | 11.7 | 15.3 | -3.7  |
| SIPA1L3 | 0 | 9.6  | 3.2  | 6.4  | -3.1  |
| ETHE1   | 0 | 9.9  | 4.0  | 5.9  | -1.9  |
| CADM4   | 0 | 8.2  | 3.9  | 4.3  | -0.4  |
| SMG9    | 3 | 9.9  | 2.7  | 7.1  | -4.4  |
| AVL9    | 0 | 6.8  | 2.3  | 4.5  | -2.2  |
| GTPBP10 | 1 | 21.1 | 16.2 | 4.9  | 11.3  |
| CDK6    | 0 | 9.1  | 2.5  | 6.6  | -4.2  |
| PMPCB   | 1 | 23.8 | 19.5 | 4.3  | 15.2  |
| DNAJC2  | 1 | 46.2 | 40.2 | 6.0  | 34.2  |
| TFPI2   | 0 | 5.7  | 2.0  | 3.7  | -1.7  |
| BET1    | 1 | 11.8 | 8.4  | 3.4  | 5.0   |
| NAMPT   | 1 | 16.7 | 10.8 | 5.9  | 4.9   |
| TWISTNB | 1 | 26.6 | 21.9 | 4.7  | 17.3  |
| PON3    | 4 | 9.7  | 3.5  | 6.2  | -2.7  |
| PON2    | 1 | 23.5 | 20.4 | 3.1  | 17.2  |
| HBP1    | 1 | 21.0 | 16.5 | 4.5  | 11.9  |
| DUS4L   | 0 | 7.1  | 2.3  | 4.8  | -2.6  |
| WDR91   | 0 | 4.6  | 2.0  | 2.6  | -0.5  |
| CBLL1   | 0 | 9.4  | 3.9  | 5.5  | -1.6  |
| MTPN    | 1 | 40.6 | 37.1 | 3.6  | 33.5  |
| MPP6    | 1 | 10.1 | 6.3  | 3.9  | 2.4   |
| DFNA5   | 3 | 9.2  | 3.6  | 5.6  | -2.0  |
| ZC3HAV1 | 0 | 8.8  | 3.6  | 5.2  | -1.6  |
| TTC26   | 1 | 8.0  | 4.2  | 3.8  | 0.4   |
| OGDH    | 0 | 17.2 | 6.3  | 10.9 | -4.6  |
| H2AFV   | 5 | 10.5 | 3.4  | 7.1  | -3.6  |
| CAV2    | 3 | 23.2 | 14.6 | 8.6  | 5.9   |
| CAV1    | 3 | 32.8 | 23.2 | 9.6  | 13.7  |
| MET     | 0 | 10.3 | 3.1  | 7.2  | -4.1  |
| LMBR1   | 1 | 11.3 | 7.8  | 3.5  | 4.2   |
| DNAJB6  | 1 | 8.4  | 4.4  | 4.0  | 0.5   |
| LFNG    | 3 | 15.0 | 6.5  | 8.4  | -1.9  |
| BRAT1   | 2 | 26.5 | 11.1 | 15.3 | -4.2  |
| IQCE    | 2 | 18.4 | 5.8  | 12.7 | -6.9  |
| SSBP1   | 1 | 21.7 | 16.2 | 5.5  | 10.7  |
| HIBADH  | 0 | 9.5  | 3.6  | 6.0  | -2.4  |
| TAX1BP1 | 1 | 62.5 | 58.9 | 3.6  | 55.3  |
| CPVL    | 0 | 7.5  | 2.9  | 4.5  | -1.6  |
| GRB10   | 3 | 16.2 | 6.6  | 9.6  | -2.9  |
| ABHD11  | 2 | 16.6 | 6.5  | 10.1 | -3.6  |
| FKBP14  | 1 | 16.0 | 12.3 | 3.7  | 8.6   |
| PLEKHA8 | 0 | 9.4  | 3.0  | 6.4  | -3.3  |
| STX1A   | 3 | 15.4 | 8.4  | 7.0  | 1.4   |
| GARS    | 1 | 16.3 | 11.6 | 4.7  | 6.9   |
| EPHB6   | 8 | 21.1 | 2.4  | 18.6 | -16.2 |
| CASP2   | 0 | 12.0 | 5.0  | 7.0  | -2.1  |
| CHCHD2  | 2 | 20.9 | 9.1  | 11.8 | -2.6  |
| HSPB1   | 0 | 8.2  | 3.3  | 4.9  | -1.6  |
| PDAP1   | 0 | 8.3  | 3.4  | 4.9  | -1.4  |
| BUD31   | 6 | 11.2 | 1.9  | 9.4  | -7.5  |

|          |   |      |      |      |      |
|----------|---|------|------|------|------|
| PTCD1    | 0 | 7.7  | 3.3  | 4.3  | -1.0 |
| CYP3A5   | 0 | 8.3  | 3.0  | 5.3  | -2.3 |
| ZKSCAN1  | 0 | 11.5 | 4.1  | 7.3  | -3.2 |
| EIF3B    | 0 | 10.0 | 4.1  | 6.0  | -1.9 |
| SNX8     | 6 | 11.1 | 2.2  | 9.0  | -6.8 |
| NUDT1    | 5 | 13.6 | 3.9  | 9.7  | -5.8 |
| TAF6     | 0 | 10.6 | 4.5  | 6.1  | -1.6 |
| WASL     | 1 | 20.0 | 17.4 | 2.6  | 14.8 |
| AIMP2    | 2 | 20.4 | 8.2  | 12.2 | -3.9 |
| MOSPD3   | 2 | 17.0 | 5.4  | 11.6 | -6.1 |
| PCOLCE   | 0 | 9.7  | 5.1  | 4.6  | 0.5  |
| RBM28    | 1 | 33.0 | 25.8 | 7.3  | 18.5 |
| USP42    | 0 | 15.0 | 6.6  | 8.4  | -1.8 |
| IMPDH1   | 0 | 6.3  | 2.7  | 3.6  | -0.9 |
| AGFG2    | 4 | 23.8 | 10.4 | 13.3 | -2.9 |
| LSM5     | 1 | 46.5 | 29.0 | 17.5 | 11.4 |
| SERPINE1 | 3 | 17.5 | 11.3 | 6.2  | 5.1  |
| AP1S1    | 0 | 13.3 | 4.9  | 8.5  | -3.6 |
| C1GALT1  | 1 | 8.1  | 4.8  | 3.4  | 1.4  |
| PLOD3    | 0 | 9.7  | 4.2  | 5.5  | -1.4 |
| RPA3     | 5 | 19.0 | 7.0  | 11.9 | -4.9 |
| ZNHIT1   | 2 | 16.5 | 6.3  | 10.2 | -4.0 |
| CLDN15   | 2 | 20.4 | 7.8  | 12.6 | -4.8 |
| PHF14    | 1 | 32.2 | 26.9 | 5.2  | 21.7 |
| NRF1     | 2 | 21.5 | 9.3  | 12.2 | -2.9 |
| TMEM106B | 1 | 12.9 | 10.1 | 2.8  | 7.3  |
| EZH2     | 5 | 14.9 | 2.9  | 12.0 | -9.2 |
| CEP41    | 3 | 9.8  | 3.4  | 6.4  | -3.1 |
| MEST     | 0 | 5.1  | 2.3  | 2.8  | -0.4 |
| ANKMY2   | 1 | 7.9  | 3.7  | 4.2  | -0.5 |
| TSPAN13  | 4 | 13.6 | 6.0  | 7.6  | -1.5 |
| RARRES2  | 0 | 9.1  | 3.7  | 5.4  | -1.6 |
| AGR2     | 4 | 16.3 | 8.5  | 7.8  | 0.7  |
| AHR      | 0 | 9.0  | 3.1  | 5.9  | -2.8 |
| CHCHD3   | 7 | 11.1 | 1.5  | 9.6  | -8.1 |
| PSMA2    | 1 | 33.7 | 26.1 | 7.7  | 18.4 |
| MRPL32   | 0 | 9.1  | 2.7  | 6.4  | -3.7 |
| COA1     | 0 | 5.9  | 2.5  | 3.4  | -0.9 |
| BLVRA    | 0 | 8.7  | 3.6  | 5.1  | -1.5 |
| URGCP    | 2 | 21.7 | 7.7  | 13.9 | -6.2 |
| TMEM248  | 0 | 5.9  | 2.8  | 3.0  | -0.2 |
| RHEB     | 1 | 16.6 | 10.9 | 5.7  | 5.2  |
| PRKAG2   | 7 | 11.8 | 1.4  | 10.4 | -8.9 |
| POLD2    | 5 | 16.1 | 5.3  | 10.8 | -5.5 |
| BCL7B    | 0 | 10.3 | 4.2  | 6.0  | -1.8 |
| YKT6     | 0 | 13.5 | 5.4  | 8.1  | -2.7 |
| TBL2     | 2 | 10.8 | 4.1  | 6.7  | -2.6 |
| CLIP2    | 0 | 10.6 | 4.9  | 5.7  | -0.8 |
| EIF4H    | 0 | 8.6  | 3.2  | 5.5  | -2.3 |
| LIMK1    | 3 | 14.2 | 6.9  | 7.3  | -0.4 |
| FKTN     | 1 | 17.6 | 14.5 | 3.1  | 11.5 |
| SPIN1    | 1 | 18.2 | 10.1 | 8.1  | 2.0  |
| NMRK1    | 0 | 8.3  | 4.1  | 4.2  | -0.1 |
| TMEM245  | 0 | 9.5  | 3.0  | 6.5  | -3.4 |

|           |    |      |      |      |       |
|-----------|----|------|------|------|-------|
| MEGF9     | 0  | 7.1  | 2.7  | 4.3  | -1.6  |
| TRIM14    | 10 | 9.9  | 1.1  | 8.8  | -7.7  |
| TGFBRI    | 1  | 14.8 | 9.5  | 5.2  | 4.3   |
| SEC61B    | 0  | 8.7  | 2.8  | 5.9  | -3.1  |
| PTGR1     | 0  | 9.4  | 4.0  | 5.4  | -1.4  |
| SUSD1     | 0  | 5.9  | 2.7  | 3.2  | -0.5  |
| AMBP      | 4  | 25.7 | 16.8 | 8.9  | 7.9   |
| DNM1      | 3  | 10.9 | 4.4  | 6.5  | -2.1  |
| AK1       | 10 | 8.8  | 1.6  | 7.2  | -5.6  |
| CDC37L1   | 1  | 7.7  | 4.8  | 2.9  | 2.0   |
| PLGRKT    | 3  | 9.6  | 3.2  | 6.4  | -3.2  |
| TBC1D13   | 10 | 22.5 | 5.3  | 17.2 | -12.0 |
| RIC1      | 1  | 11.6 | 7.5  | 4.1  | 3.4   |
| KDM4C     | 0  | 6.9  | 3.3  | 3.5  | -0.2  |
| KANK1     | 4  | 16.4 | 6.0  | 10.4 | -4.4  |
| NCS1      | 3  | 14.5 | 4.9  | 9.6  | -4.6  |
| TESK1     | 0  | 13.7 | 5.9  | 7.7  | -1.8  |
| FUBP3     | 1  | 49.8 | 45.8 | 4.0  | 41.8  |
| CREB3     | 0  | 11.9 | 4.9  | 7.0  | -2.1  |
| RGP1      | 0  | 13.7 | 6.0  | 7.7  | -1.7  |
| MPDZ      | 1  | 17.7 | 13.8 | 4.0  | 9.8   |
| EDF1      | 10 | 15.8 | 5.4  | 10.4 | -5.0  |
| GLIS3     | 3  | 13.9 | 6.4  | 7.5  | -1.1  |
| BAG1      | 2  | 19.6 | 8.6  | 11.0 | -2.4  |
| RAPGEF1   | 10 | 9.6  | 1.4  | 8.3  | -6.9  |
| NPDC1     | 0  | 6.9  | 3.0  | 3.9  | -0.9  |
| SETX      | 1  | 34.7 | 31.8 | 3.0  | 28.8  |
| ABCA2     | 0  | 13.8 | 5.3  | 8.5  | -3.1  |
| SHB       | 2  | 21.5 | 7.7  | 13.8 | -6.1  |
| UBE2R2    | 2  | 13.2 | 4.5  | 8.7  | -4.2  |
| ABHD17B   | 0  | 10.1 | 4.3  | 5.8  | -1.5  |
| EXOSC3    | 1  | 22.0 | 14.3 | 7.7  | 6.6   |
| ZFAND5    | 1  | 16.2 | 13.2 | 3.0  | 10.2  |
| DVL1      | 0  | 14.9 | 5.6  | 9.4  | -3.8  |
| PDLIM1    | 3  | 8.5  | 2.7  | 5.8  | -3.1  |
| HPS1      | 0  | 11.8 | 5.2  | 6.6  | -1.4  |
| PHYH      | 4  | 10.5 | 3.0  | 7.5  | -4.5  |
| RASSF4    | 0  | 7.2  | 3.3  | 3.8  | -0.5  |
| DNMBP     | 3  | 10.6 | 3.3  | 7.2  | -3.9  |
| RAB11FIP2 | 1  | 15.9 | 11.8 | 4.1  | 7.6   |
| ERLIN1    | 0  | 8.0  | 3.3  | 4.7  | -1.3  |
| EIF3A     | 1  | 94.3 | 89.7 | 4.6  | 85.1  |
| DDX50     | 1  | 44.8 | 35.7 | 9.1  | 26.6  |
| MAPK8     | 1  | 26.8 | 22.5 | 4.3  | 18.2  |
| SEC23IP   | 1  | 45.5 | 40.3 | 5.2  | 35.0  |
| ATE1      | 1  | 18.2 | 13.1 | 5.2  | 7.9   |
| NSMCE4A   | 0  | 13.9 | 4.5  | 9.4  | -4.9  |
| PLEKHA1   | 1  | 19.4 | 16.6 | 2.9  | 13.7  |
| C10orf54  | 0  | 9.8  | 4.6  | 5.2  | -0.5  |
| MICU1     | 0  | 6.7  | 2.9  | 3.8  | -0.9  |
| PPP3CB    | 3  | 15.6 | 4.8  | 10.8 | -6.0  |
| CCSER2    | 1  | 17.7 | 11.1 | 6.6  | 4.5   |
| BMPRI1    | 1  | 28.2 | 22.0 | 6.1  | 15.9  |
| MINPP1    | 1  | 8.2  | 5.0  | 3.2  | 1.9   |



|          |   |      |      |      |       |
|----------|---|------|------|------|-------|
| LIPA     | 0 | 5.8  | 2.3  | 3.5  | -1.2  |
| C10orf2  | 0 | 14.2 | 6.4  | 7.8  | -1.5  |
| LZTS2    | 0 | 12.3 | 5.9  | 6.4  | -0.5  |
| SFXN3    | 3 | 16.4 | 9.0  | 7.5  | 1.5   |
| KAZALD1  | 0 | 15.9 | 6.0  | 9.9  | -3.9  |
| FBXW4    | 0 | 7.3  | 3.3  | 4.0  | -0.7  |
| NPM3     | 0 | 8.3  | 3.6  | 4.8  | -1.2  |
| TNKS2    | 1 | 34.8 | 29.6 | 5.2  | 24.4  |
| GBF1     | 0 | 14.4 | 7.1  | 7.3  | -0.2  |
| ARHGAP21 | 1 | 46.6 | 39.5 | 7.1  | 32.4  |
| FBXL15   | 2 | 45.8 | 26.1 | 19.7 | 6.4   |
| CUEDC2   | 3 | 15.5 | 4.3  | 11.3 | -7.0  |
| SUFU     | 0 | 17.3 | 7.6  | 9.7  | -2.1  |
| ACBD5    | 1 | 14.8 | 10.6 | 4.2  | 6.3   |
| LHPP     | 2 | 12.4 | 4.0  | 8.4  | -4.3  |
| LARP4B   | 0 | 8.4  | 2.7  | 5.7  | -3.0  |
| GTPBP4   | 1 | 84.2 | 74.5 | 9.8  | 64.7  |
| EDRF1    | 1 | 24.4 | 18.0 | 6.4  | 11.6  |
| BCCIP    | 1 | 60.5 | 52.0 | 8.5  | 43.4  |
| MTPAP    | 1 | 15.6 | 10.1 | 5.5  | 4.6   |
| SH3PXD2A | 0 | 11.8 | 6.3  | 5.5  | 0.8   |
| PITRM1   | 3 | 12.9 | 6.3  | 6.5  | -0.2  |
| OBFC1    | 0 | 12.2 | 5.5  | 6.7  | -1.2  |
| MAP3K8   | 0 | 11.1 | 4.1  | 7.0  | -3.0  |
| DKK1     | 0 | 6.9  | 2.6  | 4.3  | -1.7  |
| GLRX3    | 7 | 12.5 | 1.2  | 11.3 | -10.1 |
| FAM208B  | 1 | 49.5 | 45.6 | 3.9  | 41.8  |
| XPNPEP1  | 6 | 11.2 | 2.1  | 9.1  | -7.0  |
| SMC3     | 7 | 59.3 | 6.2  | 53.0 | -46.8 |
| SHOC2    | 1 | 48.7 | 41.2 | 7.5  | 33.7  |
| TFAM     | 1 | 54.9 | 45.1 | 9.8  | 35.2  |
| CCDC6    | 1 | 8.0  | 4.3  | 3.7  | 0.6   |
| CUL2     | 1 | 46.2 | 40.3 | 6.0  | 34.3  |
| CCNY     | 6 | 8.6  | 1.3  | 7.3  | -6.0  |
| UBE2S    | 5 | 14.4 | 2.7  | 11.6 | -8.9  |
| RPL28    | 0 | 7.9  | 4.0  | 3.9  | 0.1   |
| ZMIZ1    | 3 | 18.4 | 9.3  | 9.1  | 0.2   |
| PPIF     | 0 | 10.5 | 4.1  | 6.3  | -2.2  |
| TSPAN14  | 3 | 11.7 | 4.8  | 7.0  | -2.2  |
| NUFIP2   | 1 | 35.1 | 30.3 | 4.7  | 25.6  |
| GIT1     | 0 | 9.9  | 4.0  | 5.9  | -1.8  |
| RPL19    | 0 | 10.2 | 4.4  | 5.8  | -1.4  |
| UBTF     | 0 | 12.9 | 5.5  | 7.4  | -1.9  |
| PSMD3    | 0 | 14.0 | 5.0  | 9.0  | -4.1  |
| CASC3    | 0 | 8.6  | 4.3  | 4.3  | 0.0   |
| RNF43    | 4 | 12.7 | 3.8  | 8.8  | -5.0  |
| RAD51C   | 5 | 23.5 | 2.7  | 20.8 | -18.1 |
| MTMR4    | 0 | 7.8  | 3.4  | 4.5  | -1.1  |
| TRIM37   | 1 | 32.5 | 27.5 | 5.0  | 22.6  |
| DHX40    | 1 | 17.9 | 14.9 | 3.0  | 11.8  |
| TUBD1    | 1 | 21.5 | 14.9 | 6.5  | 8.4   |
| KPNB1    | 1 | 78.7 | 69.1 | 9.6  | 59.4  |
| GOSR2    | 0 | 9.7  | 4.4  | 5.4  | -1.0  |
| PNPO     | 0 | 16.8 | 5.8  | 11.0 | -5.2  |

|          |    |       |       |      |       |
|----------|----|-------|-------|------|-------|
| RPS6KB1  | 1  | 29.0  | 25.7  | 3.3  | 22.3  |
| TRIM16L  | 0  | 10.6  | 4.7   | 5.9  | -1.3  |
| CDK5RAP3 | 0  | 7.5   | 3.4   | 4.1  | -0.7  |
| CBX1     | 1  | 25.7  | 20.9  | 4.7  | 16.2  |
| RECQL5   | 0  | 9.6   | 4.2   | 5.4  | -1.3  |
| PIGL     | 0  | 8.9   | 4.1   | 4.8  | -0.7  |
| GALK1    | 2  | 20.5  | 7.5   | 12.9 | -5.4  |
| INTS2    | 1  | 16.0  | 11.5  | 4.4  | 7.1   |
| CAMTA2   | 0  | 6.6   | 3.0   | 3.6  | -0.7  |
| MED13    | 1  | 29.8  | 26.0  | 3.8  | 22.1  |
| ENO3     | 6  | 29.8  | 5.8   | 24.0 | -18.3 |
| PFN1     | 10 | 13.2  | 1.2   | 11.9 | -10.7 |
| RNF167   | 0  | 8.1   | 3.3   | 4.8  | -1.5  |
| SLC25A11 | 2  | 18.0  | 6.7   | 11.2 | -4.5  |
| RAI1     | 0  | 9.9   | 4.2   | 5.7  | -1.5  |
| NUP88    | 1  | 64.5  | 51.9  | 12.5 | 39.4  |
| C1QBP    | 0  | 21.2  | 6.7   | 14.5 | -7.8  |
| BLMH     | 0  | 7.5   | 1.8   | 5.7  | -3.9  |
| CPD      | 1  | 30.9  | 25.8  | 5.1  | 20.7  |
| GOSR1    | 0  | 13.7  | 4.4   | 9.3  | -4.9  |
| CCDC47   | 1  | 44.6  | 40.8  | 3.7  | 37.1  |
| MED31    | 0  | 10.0  | 3.4   | 6.6  | -3.2  |
| DRG2     | 0  | 7.3   | 3.3   | 3.9  | -0.6  |
| FTSJ3    | 0  | 8.4   | 3.4   | 5.0  | -1.6  |
| AKAP10   | 1  | 17.2  | 13.6  | 3.7  | 9.9   |
| SMARCD2  | 2  | 15.0  | 5.4   | 9.6  | -4.1  |
| SYNGR2   | 2  | 17.7  | 4.9   | 12.9 | -8.0  |
| B9D1     | 0  | 9.5   | 4.2   | 5.3  | -1.1  |
| UTP6     | 1  | 80.8  | 71.9  | 8.9  | 63.0  |
| DDX5     | 1  | 104.1 | 100.3 | 3.8  | 96.4  |
| C17orf75 | 6  | 17.5  | 2.8   | 14.7 | -11.9 |
| CYTH1    | 0  | 6.5   | 3.0   | 3.5  | -0.5  |
| PSMD11   | 6  | 15.7  | 3.7   | 12.0 | -8.3  |
| LGALS3BP | 3  | 10.3  | 4.7   | 5.6  | -0.9  |
| CCL2     | 3  | 12.9  | 7.5   | 5.5  | 2.0   |
| KAT2A    | 2  | 17.3  | 5.5   | 11.8 | -6.3  |
| RAB5C    | 3  | 15.5  | 4.1   | 11.3 | -7.2  |
| NAGLU    | 0  | 14.0  | 5.3   | 8.6  | -3.3  |
| MLX      | 2  | 16.6  | 5.5   | 11.1 | -5.6  |
| CNTNAP1  | 0  | 7.6   | 3.3   | 4.3  | -0.9  |
| EZH1     | 0  | 7.3   | 3.4   | 4.0  | -0.6  |
| PPP1R9B  | 0  | 9.7   | 4.4   | 5.3  | -0.9  |
| COL1A1   | 3  | 14.0  | 4.9   | 9.1  | -4.2  |
| MRPL27   | 5  | 17.8  | 3.3   | 14.5 | -11.2 |
| VAT1     | 3  | 10.4  | 2.9   | 7.5  | -4.7  |
| LRRC59   | 0  | 9.8   | 3.7   | 6.1  | -2.4  |
| HDAC5    | 0  | 5.7   | 2.9   | 2.7  | 0.2   |
| ABCC3    | 3  | 18.5  | 4.6   | 13.9 | -9.2  |
| LUC7L3   | 1  | 150.0 | 143.3 | 6.7  | 136.6 |
| SMURF2   | 1  | 16.5  | 9.3   | 7.3  | 2.0   |
| DUSP3    | 0  | 11.0  | 4.2   | 6.8  | -2.7  |
| EFTUD2   | 5  | 11.4  | 2.2   | 9.2  | -7.0  |
| PRKARIA  | 1  | 34.4  | 29.3  | 5.0  | 24.3  |
| YWHAE    | 1  | 27.0  | 23.5  | 3.5  | 20.0  |

|          |   |      |      |      |       |
|----------|---|------|------|------|-------|
| MMD      | 4 | 9.4  | 3.3  | 6.0  | -2.7  |
| RANGRF   | 0 | 14.4 | 6.4  | 8.0  | -1.6  |
| DPH1     | 0 | 13.1 | 5.6  | 7.4  | -1.8  |
| MAP2K6   | 0 | 6.4  | 2.8  | 3.6  | -0.8  |
| DHRS7B   | 2 | 16.0 | 5.4  | 10.6 | -5.3  |
| WSB1     | 1 | 17.3 | 13.0 | 4.3  | 8.6   |
| SLC9A3R1 | 4 | 16.5 | 6.6  | 9.9  | -3.3  |
| NAT9     | 2 | 15.2 | 6.4  | 8.8  | -2.3  |
| TMEM104  | 0 | 16.6 | 6.2  | 10.5 | -4.3  |
| VTN      | 4 | 20.3 | 12.9 | 7.4  | 5.6   |
| TNFAIP1  | 0 | 7.9  | 3.5  | 4.4  | -0.9  |
| IFT20    | 0 | 7.6  | 2.4  | 5.2  | -2.8  |
| TMEM97   | 5 | 17.2 | 6.7  | 10.5 | -3.8  |
| CDR2L    | 0 | 9.4  | 3.6  | 5.9  | -2.3  |
| PMP22    | 3 | 10.5 | 5.0  | 5.5  | -0.6  |
| UNC119   | 0 | 8.4  | 3.9  | 4.5  | -0.6  |
| ALDOC    | 0 | 6.9  | 2.8  | 4.1  | -1.3  |
| SUPT6H   | 0 | 10.4 | 4.5  | 5.9  | -1.4  |
| RAB34    | 0 | 5.4  | 2.3  | 3.1  | -0.7  |
| PHF12    | 0 | 9.0  | 2.8  | 6.2  | -3.4  |
| TMEM33   | 0 | 7.8  | 2.9  | 4.9  | -2.0  |
| SLAIN2   | 1 | 32.1 | 23.6 | 8.5  | 15.1  |
| OCIAD1   | 1 | 12.5 | 9.6  | 2.9  | 6.8   |
| DCUN1D4  | 1 | 21.3 | 18.5 | 2.9  | 15.6  |
| USP46    | 1 | 15.2 | 10.2 | 5.0  | 5.2   |
| CHIC2    | 0 | 9.0  | 4.4  | 4.7  | -0.3  |
| LAMTOR3  | 1 | 27.1 | 23.6 | 3.5  | 20.0  |
| NFKB1    | 0 | 7.6  | 3.0  | 4.6  | -1.6  |
| AREG     | 0 | 11.3 | 4.4  | 6.9  | -2.5  |
| MANBA    | 0 | 8.0  | 4.2  | 3.8  | 0.5   |
| UBE2D3   | 1 | 36.3 | 33.5 | 2.8  | 30.7  |
| ELF2     | 1 | 19.5 | 16.7 | 2.8  | 14.0  |
| NDUFC1   | 0 | 11.8 | 4.7  | 7.1  | -2.4  |
| TBC1D9   | 0 | 4.5  | 1.7  | 2.8  | -1.1  |
| ZNF330   | 1 | 10.6 | 6.4  | 4.1  | 2.3   |
| KLHL2    | 1 | 13.0 | 9.8  | 3.2  | 6.6   |
| CPE      | 0 | 7.8  | 3.3  | 4.5  | -1.2  |
| RPL34    | 1 | 13.4 | 9.4  | 4.0  | 5.4   |
| WFS1     | 0 | 10.9 | 4.7  | 6.2  | -1.6  |
| GRPEL1   | 6 | 16.5 | 2.8  | 13.7 | -10.9 |
| GAR1     | 1 | 13.5 | 6.6  | 6.9  | -0.3  |
| FRG1     | 0 | 8.2  | 2.8  | 5.5  | -2.7  |
| CLCN3    | 1 | 23.5 | 20.6 | 2.9  | 17.8  |
| GALNT7   | 1 | 7.9  | 5.1  | 2.8  | 2.2   |
| DHX15    | 1 | 90.6 | 84.4 | 6.1  | 78.3  |
| FBXW7    | 1 | 19.3 | 15.1 | 4.2  | 10.8  |
| NEIL3    | 7 | 8.9  | 1.3  | 7.6  | -6.4  |
| WHSC1    | 5 | 15.0 | 3.3  | 11.7 | -8.4  |
| SH3D19   | 6 | 20.2 | 8.9  | 11.3 | -2.5  |
| STIM2    | 0 | 5.9  | 2.1  | 3.8  | -1.6  |
| MFSD10   | 8 | 16.8 | 2.5  | 14.2 | -11.7 |
| RAPGEF2  | 1 | 21.6 | 18.5 | 3.0  | 15.5  |
| SNX25    | 0 | 6.6  | 2.1  | 4.4  | -2.3  |
| UFSP2    | 1 | 19.7 | 15.1 | 4.6  | 10.6  |

|          |   |       |      |      |       |
|----------|---|-------|------|------|-------|
| KLF3     | 0 | 12.6  | 2.9  | 9.7  | -6.8  |
| KLHL5    | 1 | 15.0  | 10.1 | 5.0  | 5.1   |
| NCAPG    | 7 | 46.7  | 11.5 | 35.3 | -23.8 |
| UGDH     | 1 | 13.9  | 9.0  | 5.0  | 4.0   |
| CRYAB    | 0 | 5.1   | 2.3  | 2.9  | -0.6  |
| HTATIP2  | 0 | 9.2   | 3.9  | 5.3  | -1.4  |
| CTSC     | 0 | 6.1   | 2.3  | 3.7  | -1.4  |
| CCDC34   | 0 | 12.1  | 2.9  | 9.2  | -6.4  |
| ELP4     | 0 | 6.4   | 2.4  | 4.0  | -1.6  |
| ZPR1     | 6 | 13.6  | 2.2  | 11.4 | -9.1  |
| MTCH2    | 6 | 15.8  | 4.6  | 11.1 | -6.5  |
| FNBP4    | 1 | 54.3  | 50.5 | 3.9  | 46.6  |
| SC5D     | 1 | 22.8  | 18.5 | 4.3  | 14.2  |
| HSPA8    | 0 | 8.9   | 3.0  | 5.9  | -2.9  |
| DNAJC4   | 0 | 8.9   | 4.2  | 4.7  | -0.5  |
| SIAE     | 0 | 9.0   | 4.1  | 4.8  | -0.7  |
| SNX15    | 0 | 8.5   | 4.0  | 4.5  | -0.5  |
| LPXN     | 3 | 10.4  | 4.7  | 5.7  | -1.0  |
| ATG2A    | 2 | 40.1  | 20.5 | 19.6 | 0.9   |
| EHD1     | 3 | 17.4  | 5.4  | 12.1 | -6.7  |
| OSBP     | 0 | 9.3   | 3.3  | 6.0  | -2.7  |
| UNC93B1  | 0 | 10.3  | 4.2  | 6.1  | -2.0  |
| PUS3     | 0 | 8.1   | 3.3  | 4.8  | -1.5  |
| DCPS     | 2 | 17.4  | 6.3  | 11.1 | -4.7  |
| KMT5B    | 1 | 12.1  | 8.1  | 4.0  | 4.2   |
| FOXRED1  | 2 | 23.8  | 10.1 | 13.6 | -3.5  |
| PPP6R3   | 1 | 36.8  | 32.2 | 4.6  | 27.6  |
| ST3GAL4  | 9 | 12.5  | 1.0  | 11.5 | -10.5 |
| CPT1A    | 0 | 5.3   | 2.3  | 2.9  | -0.6  |
| CCND1    | 1 | 9.1   | 5.2  | 3.9  | 1.3   |
| CCDC86   | 2 | 24.5  | 7.9  | 16.6 | -8.7  |
| PRPF19   | 5 | 10.5  | 2.4  | 8.1  | -5.8  |
| TMEM109  | 0 | 10.2  | 3.5  | 6.7  | -3.1  |
| TRIM3    | 0 | 6.3   | 2.9  | 3.4  | -0.5  |
| CHORDC1  | 1 | 35.7  | 27.8 | 7.9  | 19.9  |
| ANAPC15  | 0 | 10.5  | 4.4  | 6.2  | -1.8  |
| PANX1    | 0 | 8.4   | 3.6  | 4.9  | -1.3  |
| ARHGEF17 | 0 | 9.6   | 5.0  | 4.6  | 0.4   |
| CEP164   | 2 | 20.0  | 7.1  | 12.9 | -5.8  |
| RNF141   | 1 | 8.7   | 4.4  | 4.3  | 0.1   |
| EIF4G2   | 1 | 102.7 | 94.6 | 8.1  | 86.5  |
| BIRC2    | 1 | 27.3  | 22.1 | 5.2  | 16.9  |
| UBE4A    | 0 | 10.5  | 4.1  | 6.4  | -2.2  |
| DDX6     | 1 | 31.3  | 27.2 | 4.0  | 23.2  |
| CBL      | 0 | 9.8   | 5.0  | 4.8  | 0.2   |
| PVRL1    | 2 | 14.4  | 5.3  | 9.1  | -3.8  |
| HIPK3    | 1 | 17.8  | 14.8 | 3.0  | 11.8  |
| FBXO3    | 1 | 13.8  | 10.7 | 3.2  | 7.5   |
| PDHX     | 1 | 25.5  | 19.6 | 5.9  | 13.7  |
| COMMD9   | 0 | 8.9   | 3.9  | 4.9  | -1.0  |
| ACCS     | 0 | 8.8   | 4.4  | 4.4  | 0.0   |
| MDK      | 4 | 9.5   | 2.6  | 6.9  | -4.3  |
| AMBRA1   | 2 | 33.6  | 14.0 | 19.6 | -5.5  |
| MADD     | 0 | 6.0   | 2.8  | 3.1  | -0.3  |

|          |   |       |       |      |       |
|----------|---|-------|-------|------|-------|
| PTPMT1   | 2 | 12.3  | 4.3   | 8.0  | -3.7  |
| NAA40    | 0 | 12.7  | 5.9   | 6.8  | -0.8  |
| CARS     | 0 | 6.6   | 3.2   | 3.4  | -0.2  |
| SLC22A18 | 4 | 22.0  | 7.5   | 14.5 | -7.0  |
| CD81     | 0 | 4.8   | 2.1   | 2.7  | -0.6  |
| SLC35F2  | 0 | 9.6   | 2.8   | 6.7  | -3.9  |
| C11orf58 | 1 | 116.9 | 107.8 | 9.1  | 98.7  |
| PITPNM1  | 0 | 8.8   | 4.3   | 4.5  | -0.2  |
| RPS13    | 0 | 11.7  | 4.6   | 7.1  | -2.5  |
| AIP      | 0 | 12.4  | 7.2   | 5.2  | 2.0   |
| NUP98    | 1 | 16.4  | 11.4  | 5.0  | 6.5   |
| NDUFS8   | 0 | 11.0  | 4.4   | 6.5  | -2.1  |
| TCIRG1   | 0 | 7.4   | 3.1   | 4.3  | -1.1  |
| CHKA     | 0 | 10.0  | 2.6   | 7.4  | -4.8  |
| HPS5     | 1 | 15.3  | 11.0  | 4.3  | 6.6   |
| GTF2H1   | 1 | 28.5  | 24.2  | 4.3  | 19.8  |
| PSMD9    | 0 | 7.9   | 3.4   | 4.5  | -1.1  |
| P3H3     | 0 | 7.3   | 3.2   | 4.1  | -0.8  |
| PPFIBP1  | 1 | 14.1  | 9.1   | 5.0  | 4.2   |
| PRPF40B  | 2 | 17.3  | 6.3   | 11.0 | -4.8  |
| PRDM4    | 0 | 7.2   | 3.4   | 3.7  | -0.3  |
| COQ5     | 0 | 8.2   | 3.5   | 4.7  | -1.1  |
| CORO1C   | 5 | 19.8  | 3.4   | 16.4 | -13.0 |
| CAPRIN2  | 1 | 12.6  | 10.0  | 2.6  | 7.4   |
| KCTD10   | 0 | 9.8   | 4.8   | 4.9  | -0.1  |
| SLC11A2  | 0 | 12.0  | 3.9   | 8.1  | -4.2  |
| MLEC     | 6 | 8.2   | 1.3   | 6.9  | -5.6  |
| MVK      | 4 | 14.2  | 3.3   | 10.9 | -7.6  |
| CSRNP2   | 0 | 13.0  | 6.6   | 6.5  | 0.1   |
| CAMKK2   | 4 | 20.0  | 4.0   | 15.9 | -11.9 |
| ATP5B    | 0 | 14.3  | 4.9   | 9.4  | -4.4  |
| PTGES3   | 1 | 28.6  | 22.8  | 5.8  | 17.0  |
| BCL7A    | 2 | 20.5  | 6.2   | 14.3 | -8.1  |
| RSRC2    | 1 | 106.5 | 98.8  | 7.7  | 91.1  |
| KRT18    | 0 | 10.1  | 5.7   | 4.4  | 1.3   |
| TNS2     | 3 | 10.8  | 3.3   | 7.5  | -4.2  |
| PPM1H    | 0 | 6.1   | 2.7   | 3.4  | -0.7  |
| METAP2   | 1 | 142.8 | 134.1 | 8.7  | 125.4 |
| LTA4H    | 1 | 14.0  | 10.4  | 3.6  | 6.7   |
| ELK3     | 1 | 17.9  | 8.8   | 9.1  | -0.3  |
| MAGOHB   | 7 | 37.3  | 5.2   | 32.1 | -26.9 |
| ITFG2    | 0 | 6.9   | 2.5   | 4.4  | -1.9  |
| FOXM1    | 5 | 22.6  | 13.6  | 8.9  | 4.7   |
| ARPC3    | 1 | 39.5  | 35.7  | 3.8  | 32.0  |
| GPN3     | 1 | 40.8  | 28.2  | 12.6 | 15.6  |
| VPS29    | 7 | 15.8  | 2.2   | 13.6 | -11.4 |
| RAD51AP1 | 7 | 41.0  | 8.0   | 33.0 | -25.0 |
| SH2B3    | 3 | 12.9  | 5.2   | 7.7  | -2.4  |
| MANSC1   | 4 | 11.2  | 4.8   | 6.4  | -1.6  |
| DUSP16   | 4 | 14.2  | 6.1   | 8.0  | -1.9  |
| CREBL2   | 0 | 5.7   | 1.8   | 3.9  | -2.1  |
| ACAD10   | 0 | 10.4  | 4.7   | 5.7  | -1.0  |
| ALDH2    | 4 | 13.4  | 6.4   | 7.0  | -0.6  |
| CDKN1B   | 1 | 15.7  | 11.2  | 4.5  | 6.6   |

|           |   |       |      |      |      |
|-----------|---|-------|------|------|------|
| NAA25     | 1 | 42.7  | 37.4 | 5.3  | 32.0 |
| LTBR      | 0 | 9.0   | 4.1  | 4.9  | -0.8 |
| OGFOD2    | 2 | 15.7  | 5.4  | 10.3 | -4.9 |
| CDK2AP1   | 7 | 8.0   | 0.7  | 7.3  | -6.6 |
| OAS3      | 0 | 10.2  | 4.6  | 5.6  | -1.0 |
| ARHGD1B   | 3 | 9.5   | 4.7  | 4.9  | -0.2 |
| GTF2H3    | 1 | 19.9  | 15.7 | 4.2  | 11.5 |
| EIF2B1    | 1 | 9.2   | 4.6  | 4.7  | -0.1 |
| DDX55     | 1 | 19.5  | 13.1 | 6.3  | 6.8  |
| SLC38A1   | 1 | 25.5  | 21.4 | 4.1  | 17.3 |
| C12orf49  | 0 | 7.8   | 3.5  | 4.2  | -0.7 |
| RFC5      | 5 | 20.0  | 8.3  | 11.7 | -3.4 |
| STX2      | 0 | 11.0  | 2.6  | 8.4  | -5.8 |
| COPZ1     | 0 | 12.3  | 5.4  | 6.9  | -1.4 |
| CAND1     | 1 | 106.2 | 98.9 | 7.3  | 91.7 |
| RAB5B     | 0 | 8.1   | 4.4  | 3.7  | 0.7  |
| MDM1      | 1 | 19.7  | 15.0 | 4.7  | 10.2 |
| NUP107    | 1 | 101.3 | 91.3 | 10.0 | 81.3 |
| CNOT2     | 1 | 80.8  | 75.5 | 5.3  | 70.2 |
| TIMELESS  | 5 | 18.5  | 5.5  | 13.1 | -7.6 |
| CPSF6     | 1 | 30.8  | 23.3 | 7.5  | 15.8 |
| KRR1      | 1 | 63.5  | 58.3 | 5.1  | 53.2 |
| MRPL51    | 1 | 63.7  | 49.7 | 14.0 | 35.7 |
| GAPDH     | 0 | 6.3   | 3.1  | 3.2  | -0.1 |
| NOP2      | 0 | 14.0  | 5.8  | 8.2  | -2.4 |
| CHD4      | 1 | 26.9  | 23.0 | 3.8  | 19.2 |
| UHRF1BP1I | 1 | 33.5  | 28.4 | 5.1  | 23.2 |
| COPS7A    | 0 | 8.2   | 4.1  | 4.1  | 0.0  |
| ING4      | 0 | 8.5   | 4.7  | 3.8  | 0.9  |
| CDCA3     | 5 | 22.1  | 13.1 | 9.0  | 4.1  |
| CHPT1     | 4 | 15.9  | 4.6  | 11.2 | -6.6 |
| USP5      | 0 | 11.8  | 4.8  | 7.0  | -2.2 |
| TPI1      | 0 | 7.6   | 3.7  | 3.9  | -0.2 |
| GNPTAB    | 1 | 12.9  | 9.9  | 3.0  | 7.0  |
| SPSB2     | 0 | 10.3  | 4.0  | 6.2  | -2.2 |
| ENO2      | 3 | 11.0  | 4.4  | 6.6  | -2.2 |
| ATN1      | 0 | 11.3  | 5.1  | 6.2  | -1.1 |
| C12orf57  | 0 | 6.5   | 3.1  | 3.4  | -0.2 |
| PTPN6     | 4 | 21.7  | 8.3  | 13.4 | -5.1 |
| LPCAT3    | 4 | 10.4  | 3.2  | 7.3  | -4.1 |
| SUDS3     | 1 | 12.4  | 6.6  | 5.8  | 0.8  |
| GOLT1B    | 1 | 73.6  | 66.4 | 7.2  | 59.2 |
| LDHB      | 1 | 7.5   | 4.8  | 2.7  | 2.0  |
| PRKAB1    | 0 | 9.0   | 3.8  | 5.1  | -1.3 |
| CMAS      | 1 | 19.5  | 15.1 | 4.4  | 10.8 |
| C2CD5     | 1 | 44.3  | 37.8 | 6.5  | 31.3 |
| RAB35     | 0 | 9.3   | 3.6  | 5.6  | -2.0 |
| PHC1      | 0 | 11.5  | 5.0  | 6.4  | -1.4 |
| COX6A1    | 4 | 22.2  | 6.4  | 15.8 | -9.4 |
| RIC8B     | 0 | 5.8   | 1.7  | 4.1  | -2.3 |
| SRSF9     | 0 | 12.6  | 5.4  | 7.2  | -1.8 |
| FGFR1OP2  | 1 | 23.3  | 19.9 | 3.4  | 16.5 |
| COL12A1   | 3 | 10.7  | 3.8  | 6.9  | -3.1 |
| BTN3A3    | 3 | 12.7  | 3.9  | 8.8  | -4.8 |

|         |   |      |      |      |       |
|---------|---|------|------|------|-------|
| TDP2    | 1 | 17.7 | 13.4 | 4.3  | 9.1   |
| RWDD1   | 1 | 34.2 | 25.9 | 8.3  | 17.7  |
| TMEM14C | 3 | 14.3 | 5.4  | 8.8  | -3.4  |
| PAK1IP1 | 1 | 25.1 | 17.0 | 8.0  | 9.0   |
| GCNT2   | 0 | 7.2  | 2.7  | 4.6  | -1.9  |
| NEDD9   | 0 | 5.5  | 2.3  | 3.2  | -0.9  |
| ASF1A   | 1 | 10.6 | 7.0  | 3.6  | 3.5   |
| MCM9    | 0 | 6.4  | 2.4  | 4.1  | -1.7  |
| RNGTT   | 1 | 18.6 | 13.8 | 4.7  | 9.1   |
| MAN1A1  | 4 | 19.0 | 8.8  | 10.2 | -1.4  |
| SERINC1 | 1 | 63.6 | 60.2 | 3.4  | 56.8  |
| HDCC2   | 1 | 10.0 | 5.2  | 4.8  | 0.4   |
| TPD52L1 | 0 | 7.7  | 3.2  | 4.5  | -1.3  |
| HINT3   | 1 | 16.1 | 12.8 | 3.2  | 9.6   |
| NCOA7   | 1 | 10.8 | 7.0  | 3.8  | 3.3   |
| FBX05   | 7 | 31.3 | 7.0  | 24.2 | -17.2 |
| MTRF1L  | 1 | 22.7 | 17.6 | 5.1  | 12.5  |
| PPARD   | 0 | 16.3 | 6.9  | 9.4  | -2.5  |
| MAPK14  | 0 | 7.7  | 3.1  | 4.6  | -1.5  |
| KCTD20  | 1 | 12.4 | 8.5  | 3.9  | 4.6   |
| STK38   | 3 | 9.6  | 3.3  | 6.3  | -3.0  |
| SRSF3   | 1 | 59.0 | 46.2 | 12.8 | 33.4  |
| SOD2    | 0 | 8.7  | 3.7  | 5.0  | -1.2  |
| MRPL18  | 0 | 9.0  | 2.9  | 6.2  | -3.3  |
| MCM3    | 5 | 20.2 | 9.5  | 10.7 | -1.2  |
| RNF8    | 0 | 9.4  | 3.7  | 5.7  | -2.0  |
| FBX09   | 1 | 8.3  | 5.5  | 2.7  | 2.8   |
| MDN1    | 1 | 18.9 | 12.5 | 6.4  | 6.1   |
| SAYS1   | 2 | 11.8 | 4.1  | 7.7  | -3.6  |
| RBM24   | 0 | 6.4  | 2.1  | 4.4  | -2.3  |
| CAP2    | 0 | 11.7 | 2.3  | 9.5  | -7.2  |
| ZNF451  | 1 | 35.6 | 31.3 | 4.3  | 27.0  |
| BAG2    | 7 | 11.7 | 1.2  | 10.5 | -9.4  |
| RAB23   | 1 | 18.4 | 12.6 | 5.8  | 6.8   |
| CCNC    | 1 | 49.4 | 41.0 | 8.5  | 32.5  |
| E2F3    | 0 | 7.8  | 3.4  | 4.4  | -0.9  |
| PTP4A1  | 1 | 58.3 | 51.5 | 6.9  | 44.6  |
| ASCC3   | 1 | 23.2 | 19.1 | 4.0  | 15.1  |
| MED23   | 1 | 18.1 | 15.2 | 2.8  | 12.4  |
| WASF1   | 0 | 5.6  | 2.4  | 3.2  | -0.8  |
| GPLD1   | 0 | 7.6  | 3.1  | 4.5  | -1.4  |
| ACOT13  | 0 | 11.2 | 4.0  | 7.2  | -3.2  |
| SMAP1   | 0 | 8.1  | 3.4  | 4.8  | -1.4  |
| RPS12   | 0 | 9.4  | 2.7  | 6.7  | -4.0  |
| C6orf62 | 1 | 42.2 | 38.3 | 3.9  | 34.4  |
| GMNN    | 5 | 24.4 | 8.4  | 16.0 | -7.6  |
| SNX3    | 1 | 12.4 | 8.2  | 4.3  | 3.9   |
| HBS1L   | 1 | 75.4 | 70.4 | 5.0  | 65.4  |
| PEX7    | 2 | 15.9 | 6.9  | 9.1  | -2.2  |
| FIG4    | 0 | 6.3  | 2.0  | 4.2  | -2.2  |
| PERP    | 0 | 6.6  | 2.8  | 3.8  | -1.0  |
| ADGRG6  | 0 | 8.1  | 2.2  | 5.9  | -3.7  |
| PHACTR2 | 0 | 11.4 | 3.5  | 7.9  | -4.3  |
| SLC39A7 | 0 | 8.7  | 4.7  | 4.0  | 0.7   |

|          |   |      |      |      |       |
|----------|---|------|------|------|-------|
| PHF1     | 0 | 11.7 | 6.1  | 5.5  | 0.6   |
| CUTA     | 3 | 15.8 | 4.5  | 11.3 | -6.8  |
| QKI      | 1 | 22.9 | 17.2 | 5.7  | 11.5  |
| CCND3    | 3 | 14.5 | 4.3  | 10.1 | -5.8  |
| BYSL     | 0 | 13.9 | 5.5  | 8.5  | -3.0  |
| FAM120B  | 0 | 5.7  | 2.7  | 3.0  | -0.3  |
| TBP      | 0 | 8.1  | 3.2  | 4.9  | -1.7  |
| PPP2R5D  | 0 | 14.5 | 6.4  | 8.1  | -1.8  |
| MRPL2    | 2 | 17.3 | 5.6  | 11.7 | -6.1  |
| SRF      | 0 | 13.8 | 5.2  | 8.6  | -3.4  |
| CUL9     | 0 | 13.1 | 5.8  | 7.3  | -1.5  |
| DNPH1    | 2 | 17.6 | 7.1  | 10.5 | -3.4  |
| DUSP22   | 0 | 10.5 | 5.6  | 4.8  | 0.8   |
| EXOC2    | 0 | 7.1  | 2.3  | 4.8  | -2.5  |
| COX7A2   | 6 | 10.2 | 2.3  | 7.8  | -5.5  |
| TMEM30A  | 1 | 65.8 | 59.3 | 6.4  | 52.9  |
| GMDS     | 4 | 23.8 | 9.3  | 14.5 | -5.3  |
| SENP6    | 1 | 69.6 | 64.0 | 5.7  | 58.3  |
| VEGFA    | 3 | 9.2  | 2.7  | 6.5  | -3.7  |
| PRPF4B   | 1 | 90.1 | 84.6 | 5.5  | 79.0  |
| TTK      | 7 | 47.4 | 9.7  | 37.8 | -28.1 |
| SLC29A1  | 0 | 8.5  | 3.3  | 5.2  | -1.9  |
| BTN2A1   | 0 | 9.3  | 4.3  | 5.0  | -0.6  |
| LAMA4    | 0 | 6.2  | 2.9  | 3.4  | -0.5  |
| FBRSL1   | 0 | 7.8  | 3.4  | 4.4  | -1.0  |
| ERBB2IP  | 1 | 57.6 | 49.9 | 7.7  | 42.3  |
| HARS2    | 0 | 6.8  | 2.9  | 3.9  | -1.0  |
| NUDT12   | 1 | 6.8  | 3.6  | 3.3  | 0.3   |
| CEP72    | 2 | 12.6 | 4.3  | 8.3  | -4.0  |
| MAN2A1   | 1 | 12.4 | 9.8  | 2.6  | 7.3   |
| PAPD7    | 0 | 10.6 | 5.0  | 5.6  | -0.6  |
| HMGCS1   | 1 | 10.7 | 5.8  | 4.9  | 0.8   |
| DAP      | 0 | 11.8 | 4.7  | 7.0  | -2.3  |
| BRD8     | 1 | 31.4 | 27.8 | 3.6  | 24.3  |
| KIF20A   | 5 | 22.2 | 12.1 | 10.1 | 2.1   |
| NNT      | 0 | 5.5  | 1.7  | 3.9  | -2.2  |
| MRPS30   | 0 | 10.6 | 4.1  | 6.6  | -2.5  |
| HSPA9    | 1 | 75.8 | 69.5 | 6.3  | 63.2  |
| MRPS27   | 0 | 10.2 | 3.7  | 6.5  | -2.8  |
| PFDN1    | 1 | 13.2 | 7.0  | 6.1  | 0.9   |
| HBEGF    | 3 | 11.0 | 4.0  | 7.1  | -3.1  |
| APBB3    | 0 | 10.6 | 5.7  | 4.9  | 0.8   |
| TMCO6    | 2 | 18.2 | 6.1  | 12.1 | -6.0  |
| SPARC    | 0 | 9.6  | 2.8  | 6.9  | -4.1  |
| IK       | 1 | 96.6 | 91.5 | 5.1  | 86.5  |
| HMGCR    | 1 | 26.2 | 21.4 | 4.8  | 16.5  |
| COL4A3BP | 1 | 23.5 | 20.1 | 3.5  | 16.6  |
| FAF2     | 0 | 8.2  | 2.8  | 5.3  | -2.5  |
| CLK4     | 1 | 17.0 | 13.8 | 3.1  | 10.7  |
| HAVCR1   | 0 | 8.6  | 2.1  | 6.5  | -4.4  |
| RNF130   | 0 | 9.1  | 4.2  | 4.9  | -0.8  |
| THG1L    | 7 | 13.4 | 1.3  | 12.1 | -10.8 |
| ARSB     | 0 | 10.6 | 5.8  | 4.9  | 0.9   |
| CLINT1   | 1 | 56.3 | 52.7 | 3.6  | 49.0  |



|          |   |       |      |      |       |
|----------|---|-------|------|------|-------|
| CNOT6    | 1 | 22.2  | 18.3 | 3.9  | 14.4  |
| TTC1     | 0 | 11.1  | 3.6  | 7.5  | -3.8  |
| MSH3     | 1 | 10.8  | 6.6  | 4.3  | 2.3   |
| CCNG1    | 1 | 30.4  | 26.9 | 3.5  | 23.5  |
| POLR3G   | 7 | 9.7   | 1.2  | 8.5  | -7.3  |
| DROSHA   | 6 | 39.2  | 6.4  | 32.8 | -26.4 |
| CDH6     | 3 | 10.3  | 3.5  | 6.8  | -3.3  |
| LMNB1    | 5 | 36.2  | 16.3 | 19.9 | -3.6  |
| ARRDC3   | 1 | 10.0  | 6.9  | 3.1  | 3.7   |
| GOLPH3   | 0 | 6.9   | 3.1  | 3.8  | -0.7  |
| SUB1     | 1 | 37.4  | 33.2 | 4.2  | 29.1  |
| FAM172A  | 0 | 9.9   | 2.7  | 7.2  | -4.4  |
| TARS     | 1 | 85.6  | 80.7 | 5.0  | 75.7  |
| LNPEP    | 1 | 12.2  | 9.0  | 3.2  | 5.8   |
| RAD1     | 0 | 9.4   | 3.0  | 6.4  | -3.4  |
| BRIX1    | 1 | 65.9  | 51.6 | 14.3 | 37.3  |
| SLC12A7  | 4 | 16.5  | 5.4  | 11.1 | -5.7  |
| RAD50    | 1 | 31.9  | 27.2 | 4.7  | 22.5  |
| GNPDA1   | 0 | 11.6  | 4.7  | 6.9  | -2.2  |
| SKP1     | 1 | 17.9  | 14.4 | 3.5  | 10.9  |
| NUP155   | 7 | 13.9  | 2.0  | 11.9 | -9.9  |
| PPP2CA   | 1 | 19.3  | 14.5 | 4.8  | 9.7   |
| NR3C1    | 1 | 16.1  | 10.3 | 5.8  | 4.5   |
| C5orf15  | 1 | 16.7  | 13.8 | 3.0  | 10.8  |
| PPWD1    | 1 | 70.0  | 64.7 | 5.3  | 59.4  |
| TRAPPC13 | 1 | 34.8  | 29.7 | 5.1  | 24.5  |
| SEC24A   | 1 | 12.4  | 8.7  | 3.7  | 4.9   |
| TXNDC15  | 1 | 15.2  | 10.6 | 4.7  | 5.9   |
| TTC33    | 1 | 12.7  | 8.2  | 4.6  | 3.6   |
| RARS     | 1 | 55.4  | 50.1 | 5.3  | 44.9  |
| WWC1     | 0 | 7.3   | 2.8  | 4.5  | -1.7  |
| H2AFY    | 0 | 11.3  | 4.6  | 6.7  | -2.1  |
| TCERG1   | 1 | 107.3 | 98.8 | 8.5  | 90.3  |
| DPYSL3   | 3 | 12.1  | 5.4  | 6.6  | -1.2  |
| SMAD5    | 1 | 34.7  | 29.4 | 5.3  | 24.1  |
| CSNK1A1  | 1 | 87.4  | 82.8 | 4.6  | 78.2  |
| HMGXB3   | 0 | 6.5   | 3.5  | 3.0  | 0.5   |
| ERGIC1   | 3 | 12.8  | 6.1  | 6.7  | -0.5  |
| ATP6VOE1 | 6 | 13.6  | 3.1  | 10.5 | -7.3  |
| BNIP1    | 2 | 19.9  | 6.8  | 13.1 | -6.3  |
| STC2     | 0 | 11.2  | 2.3  | 8.9  | -6.5  |
| CPEB4    | 1 | 14.5  | 10.5 | 4.0  | 6.5   |
| DBN1     | 0 | 7.6   | 2.5  | 5.1  | -2.7  |
| ZNF346   | 0 | 7.2   | 3.4  | 3.8  | -0.3  |
| EHHADH   | 4 | 13.3  | 5.0  | 8.2  | -3.2  |
| SMC4     | 1 | 65.5  | 54.2 | 11.4 | 42.8  |
| SELK     | 0 | 5.4   | 2.2  | 3.2  | -0.9  |
| ACTR8    | 0 | 7.7   | 3.0  | 4.7  | -1.8  |
| TBCCD1   | 0 | 8.8   | 3.9  | 4.9  | -1.1  |
| TIMMDC1  | 0 | 8.2   | 2.9  | 5.3  | -2.3  |
| CRBN     | 1 | 19.1  | 15.8 | 3.2  | 12.6  |
| BCL6     | 0 | 7.5   | 3.4  | 4.1  | -0.7  |
| HGD      | 4 | 27.0  | 17.7 | 9.3  | 8.4   |
| NPHP3    | 1 | 22.6  | 18.0 | 4.6  | 13.3  |

|          |   |      |      |      |       |
|----------|---|------|------|------|-------|
| AMOTL2   | 3 | 13.7 | 7.2  | 6.5  | 0.7   |
| NIT2     | 6 | 9.6  | 1.3  | 8.3  | -7.0  |
| FAM162A  | 0 | 12.7 | 4.0  | 8.7  | -4.7  |
| OGG1     | 0 | 11.9 | 5.0  | 7.0  | -2.0  |
| KPNA1    | 1 | 13.6 | 8.6  | 5.0  | 3.6   |
| PCCB     | 4 | 17.9 | 5.4  | 12.5 | -7.2  |
| UBE3A    | 1 | 44.4 | 41.0 | 3.3  | 37.7  |
| ARMC8    | 1 | 34.7 | 29.6 | 5.1  | 24.5  |
| CEP70    | 1 | 18.0 | 14.6 | 3.5  | 11.1  |
| RBP1     | 0 | 6.5  | 3.0  | 3.6  | -0.6  |
| RNF7     | 0 | 8.0  | 3.9  | 4.2  | -0.3  |
| TFDP2    | 1 | 9.0  | 4.9  | 4.1  | 0.8   |
| XRN1     | 1 | 23.2 | 19.3 | 3.9  | 15.4  |
| KAT2B    | 1 | 8.9  | 4.6  | 4.3  | 0.3   |
| PDCD10   | 1 | 58.1 | 54.3 | 3.8  | 50.5  |
| PFKFB4   | 0 | 7.3  | 3.3  | 4.0  | -0.7  |
| COL7A1   | 3 | 9.7  | 4.4  | 5.3  | -0.8  |
| PRKAR2A  | 0 | 10.8 | 5.2  | 5.7  | -0.5  |
| HES1     | 4 | 15.1 | 5.0  | 10.1 | -5.1  |
| USP4     | 0 | 8.8  | 4.1  | 4.7  | -0.5  |
| ACAP2    | 1 | 18.5 | 15.0 | 3.5  | 11.5  |
| ECT2     | 1 | 65.9 | 55.3 | 10.6 | 44.7  |
| GNAI2    | 3 | 19.8 | 11.5 | 8.3  | 3.2   |
| TFG      | 1 | 7.7  | 3.9  | 3.8  | 0.1   |
| TUSC2    | 2 | 30.0 | 13.4 | 16.6 | -3.3  |
| NPRL2    | 0 | 13.8 | 6.2  | 7.6  | -1.5  |
| RPL24    | 0 | 6.9  | 2.8  | 4.0  | -1.2  |
| CYB561D2 | 9 | 23.1 | 2.5  | 20.6 | -18.1 |
| FXR1     | 1 | 92.0 | 86.7 | 5.3  | 81.4  |
| CBLB     | 0 | 7.3  | 3.4  | 3.8  | -0.4  |
| BBX      | 1 | 32.3 | 27.7 | 4.5  | 23.2  |
| IFT57    | 1 | 16.6 | 11.0 | 5.7  | 5.3   |
| GBE1     | 0 | 10.6 | 3.4  | 7.2  | -3.8  |
| UMPS     | 6 | 42.7 | 13.4 | 29.2 | -15.8 |
| NCBP2    | 1 | 38.5 | 35.5 | 3.0  | 32.5  |
| SNX4     | 1 | 39.9 | 35.1 | 4.9  | 30.2  |
| C3orf52  | 0 | 5.1  | 2.1  | 3.0  | -0.9  |
| SLC41A3  | 0 | 14.6 | 5.6  | 9.0  | -3.3  |
| PLXNA1   | 0 | 9.2  | 4.7  | 4.5  | 0.1   |
| ATP6V1A  | 1 | 15.7 | 12.0 | 3.7  | 8.3   |
| ABTB1    | 0 | 12.0 | 5.3  | 6.7  | -1.4  |
| PODXL2   | 0 | 5.5  | 2.2  | 3.3  | -1.1  |
| KLHL18   | 2 | 13.4 | 4.9  | 8.5  | -3.6  |
| SCAP     | 4 | 18.0 | 4.2  | 13.8 | -9.6  |
| MRPL3    | 1 | 42.7 | 35.6 | 7.0  | 28.6  |
| HEMK1    | 2 | 20.3 | 7.5  | 12.8 | -5.3  |
| MAPKAPK3 | 0 | 15.9 | 6.7  | 9.2  | -2.5  |
| WDR48    | 1 | 20.0 | 16.7 | 3.3  | 13.5  |
| COMM2    | 0 | 6.3  | 2.6  | 3.7  | -1.1  |
| GORASP1  | 0 | 13.8 | 5.7  | 8.0  | -2.3  |
| RRP9     | 2 | 25.6 | 9.4  | 16.2 | -6.8  |
| ABCC5    | 0 | 10.0 | 4.3  | 5.7  | -1.4  |
| ABHD14B  | 2 | 15.0 | 5.1  | 9.9  | -4.8  |
| EIF1B    | 4 | 10.5 | 2.4  | 8.1  | -5.6  |

|         |    |       |      |      |       |
|---------|----|-------|------|------|-------|
| KLHL24  | 0  | 10.1  | 3.7  | 6.4  | -2.8  |
| SSR3    | 1  | 15.4  | 12.9 | 2.6  | 10.3  |
| NKTR    | 1  | 51.8  | 48.6 | 3.1  | 45.5  |
| CLCN2   | 12 | 28.8  | 2.0  | 26.8 | -24.7 |
| FOXP1   | 0  | 7.3   | 2.2  | 5.2  | -3.0  |
| EIF4G1  | 0  | 8.3   | 3.3  | 5.0  | -1.7  |
| SPCS1   | 0  | 10.3  | 4.7  | 5.7  | -1.0  |
| NEK4    | 1  | 9.8   | 5.8  | 4.0  | 1.8   |
| EEF1B2  | 0  | 11.4  | 4.7  | 6.7  | -1.9  |
| DGUOK   | 0  | 10.6  | 5.0  | 5.6  | -0.6  |
| MOB1A   | 1  | 83.6  | 77.5 | 6.1  | 71.4  |
| KANSL3  | 0  | 8.2   | 4.4  | 3.8  | 0.6   |
| LMAN2L  | 0  | 10.2  | 4.2  | 6.0  | -1.9  |
| RTKN    | 4  | 21.2  | 9.8  | 11.4 | -1.7  |
| TTL     | 1  | 9.3   | 4.5  | 4.8  | -0.3  |
| CCL20   | 4  | 14.8  | 7.2  | 7.5  | -0.3  |
| PIKFYVE | 1  | 27.7  | 24.3 | 3.5  | 20.8  |
| FAHD2A  | 2  | 14.6  | 5.9  | 8.7  | -2.8  |
| NCL     | 1  | 104.1 | 93.5 | 10.6 | 82.9  |
| ACTR1B  | 10 | 14.6  | 1.5  | 13.1 | -11.6 |
| SLC35F5 | 1  | 66.3  | 58.0 | 8.3  | 49.7  |
| ACTR3   | 1  | 70.1  | 63.5 | 6.6  | 56.8  |
| STEAP3  | 3  | 15.9  | 9.0  | 6.9  | 2.0   |
| EPB41L5 | 4  | 20.8  | 4.9  | 15.9 | -11.0 |
| SF3B6   | 1  | 26.1  | 22.2 | 3.9  | 18.4  |
| TP53I3  | 0  | 5.0   | 2.1  | 2.9  | -0.7  |
| STAM2   | 1  | 30.4  | 26.2 | 4.2  | 22.0  |
| GPD2    | 1  | 20.8  | 17.8 | 3.0  | 14.9  |
| CENPA   | 5  | 15.0  | 5.4  | 9.7  | -4.3  |
| ACVR1   | 0  | 7.7   | 3.3  | 4.5  | -1.2  |
| TANC1   | 0  | 6.4   | 2.7  | 3.6  | -0.9  |
| MPV17   | 0  | 8.3   | 3.9  | 4.5  | -0.6  |
| GTF3C2  | 0  | 8.6   | 3.5  | 5.1  | -1.6  |
| EIF2B4  | 0  | 14.6  | 6.5  | 8.1  | -1.6  |
| NRBP1   | 0  | 6.3   | 3.2  | 3.1  | 0.1   |
| FNDC4   | 0  | 14.7  | 5.5  | 9.3  | -3.8  |
| PSMD14  | 1  | 54.3  | 46.3 | 7.9  | 38.4  |
| SNX17   | 2  | 14.9  | 5.1  | 9.8  | -4.7  |
| ASB3    | 1  | 13.5  | 9.2  | 4.2  | 5.0   |
| PPM1G   | 2  | 18.6  | 6.7  | 11.8 | -5.1  |
| REEP6   | 4  | 26.4  | 11.2 | 15.2 | -4.0  |
| RPS15   | 8  | 18.2  | 6.9  | 11.3 | -4.4  |
| GCA     | 1  | 8.8   | 5.3  | 3.4  | 1.9   |
| INO80B  | 2  | 14.2  | 5.6  | 8.6  | -3.0  |
| MOGS    | 11 | 14.4  | 1.1  | 13.4 | -12.3 |
| TTC31   | 0  | 9.2   | 4.2  | 5.0  | -0.8  |
| NDUFS7  | 8  | 22.3  | 6.2  | 16.1 | -9.9  |
| PCGF1   | 6  | 9.3   | 1.2  | 8.1  | -7.0  |
| GRB14   | 1  | 8.1   | 4.0  | 4.1  | -0.1  |
| CLIP4   | 1  | 11.1  | 6.6  | 4.5  | 2.2   |
| SPTBN1  | 0  | 9.1   | 3.7  | 5.4  | -1.7  |
| AUP1    | 2  | 17.8  | 5.5  | 12.3 | -6.8  |
| RTN4    | 1  | 22.0  | 14.2 | 7.8  | 6.3   |
| HTRA2   | 2  | 17.3  | 6.5  | 10.8 | -4.3  |

|         |   |       |       |      |       |
|---------|---|-------|-------|------|-------|
| POLE4   | 6 | 9.9   | 2.6   | 7.2  | -4.6  |
| CCDC88A | 1 | 51.9  | 43.6  | 8.3  | 35.4  |
| EVA1A   | 0 | 7.3   | 2.9   | 4.4  | -1.5  |
| MRPL19  | 1 | 43.3  | 36.5  | 6.8  | 29.7  |
| LANCL1  | 1 | 21.7  | 18.8  | 2.9  | 15.9  |
| WDR75   | 1 | 68.8  | 59.8  | 9.0  | 50.8  |
| EFEMP1  | 3 | 8.4   | 3.5   | 4.9  | -1.5  |
| FANCL   | 1 | 26.5  | 20.9  | 5.6  | 15.3  |
| FN1     | 0 | 7.1   | 3.2   | 3.8  | -0.6  |
| STAT1   | 1 | 16.1  | 12.9  | 3.2  | 9.6   |
| GLS     | 1 | 89.3  | 81.2  | 8.1  | 73.1  |
| PECR    | 4 | 16.6  | 7.6   | 9.0  | -1.4  |
| UNC50   | 1 | 13.4  | 9.0   | 4.4  | 4.6   |
| IGFBP2  | 0 | 6.6   | 2.7   | 4.0  | -1.3  |
| ELMOD3  | 0 | 5.3   | 2.6   | 2.8  | -0.2  |
| USP34   | 1 | 65.5  | 61.0  | 4.4  | 56.6  |
| CCT4    | 7 | 22.7  | 2.6   | 20.1 | -17.5 |
| GGCX    | 4 | 14.7  | 4.5   | 10.2 | -5.8  |
| EHBP1   | 1 | 25.3  | 22.0  | 3.2  | 18.8  |
| TXNDC9  | 1 | 72.8  | 64.0  | 8.7  | 55.3  |
| COQ10B  | 1 | 25.1  | 20.5  | 4.6  | 15.9  |
| SF3B1   | 1 | 140.4 | 134.6 | 5.9  | 128.7 |
| ST3GAL5 | 0 | 5.2   | 2.1   | 3.1  | -0.9  |
| PDCL3   | 7 | 19.0  | 2.3   | 16.7 | -14.4 |
| MOB4    | 1 | 24.0  | 19.8  | 4.2  | 15.6  |
| HSPE1   | 6 | 23.0  | 3.6   | 19.3 | -15.7 |
| KDM3A   | 1 | 25.8  | 22.2  | 3.6  | 18.6  |
| CHMP3   | 1 | 26.2  | 22.5  | 3.6  | 18.9  |
| ZNF142  | 2 | 18.5  | 6.0   | 12.6 | -6.6  |
| IL1R1   | 0 | 6.2   | 2.6   | 3.6  | -1.0  |
| FHL2    | 3 | 19.4  | 12.9  | 6.6  | 6.3   |
| MLPH    | 3 | 18.6  | 10.6  | 7.9  | 2.7   |
| CNPPD1  | 2 | 13.9  | 4.3   | 9.6  | -5.3  |
| UXS1    | 1 | 8.7   | 4.6   | 4.1  | 0.5   |
| ABCB6   | 0 | 9.1   | 3.4   | 5.7  | -2.3  |
| STK16   | 0 | 11.2  | 4.8   | 6.4  | -1.6  |
| HDLBP   | 6 | 10.8  | 2.0   | 8.9  | -6.9  |
| PPP1R7  | 6 | 14.5  | 4.1   | 10.4 | -6.3  |
| PASK    | 0 | 6.6   | 2.4   | 4.2  | -1.8  |
| STK25   | 0 | 10.6  | 3.9   | 6.7  | -2.8  |
| PROC    | 4 | 12.7  | 6.6   | 6.2  | 0.4   |
| ID2     | 0 | 6.6   | 2.3   | 4.3  | -2.1  |
| TAF1B   | 1 | 22.6  | 17.5  | 5.2  | 12.3  |
| HPCAL1  | 3 | 20.2  | 9.4   | 10.8 | -1.4  |
| ODC1    | 0 | 13.7  | 4.7   | 9.0  | -4.3  |
| BIRC6   | 1 | 58.2  | 52.9  | 5.3  | 47.6  |
| NOL10   | 1 | 18.6  | 12.2  | 6.4  | 5.8   |
| PLEKHB2 | 0 | 5.8   | 2.6   | 3.2  | -0.6  |
| GORASP2 | 0 | 7.2   | 3.0   | 4.2  | -1.2  |
| STRN    | 1 | 21.8  | 18.3  | 3.4  | 14.9  |
| CEBPZ   | 1 | 55.2  | 48.8  | 6.4  | 42.4  |
| PRKD3   | 1 | 47.9  | 43.1  | 4.7  | 38.4  |
| DCAF17  | 1 | 24.5  | 19.6  | 4.9  | 14.7  |
| QPCT    | 3 | 7.9   | 2.7   | 5.2  | -2.5  |

|          |    |       |       |      |       |
|----------|----|-------|-------|------|-------|
| RAB3GAP1 | 1  | 34.6  | 31.3  | 3.4  | 27.9  |
| SLC25A12 | 1  | 8.4   | 4.3   | 4.2  | 0.1   |
| DARS     | 1  | 77.9  | 65.1  | 12.7 | 52.4  |
| SRSF7    | 1  | 78.2  | 63.9  | 14.3 | 49.6  |
| SDC1     | 4  | 12.2  | 3.5   | 8.6  | -5.1  |
| SLC1A4   | 0  | 5.3   | 2.4   | 2.9  | -0.4  |
| SOS1     | 1  | 23.8  | 20.0  | 3.8  | 16.3  |
| KYNU     | 0  | 9.6   | 4.2   | 5.4  | -1.2  |
| ORC2     | 1  | 45.5  | 36.8  | 8.7  | 28.0  |
| COX7A2L  | 0  | 9.3   | 4.2   | 5.1  | -0.9  |
| PNO1     | 7  | 18.5  | 1.9   | 16.6 | -14.7 |
| ORC4     | 1  | 51.3  | 46.2  | 5.2  | 41.0  |
| RND3     | 1  | 13.9  | 7.7   | 6.2  | 1.6   |
| ATF2     | 1  | 40.0  | 35.9  | 4.0  | 31.9  |
| THADA    | 1  | 11.0  | 6.4   | 4.6  | 1.8   |
| AAK1     | 0  | 9.9   | 4.5   | 5.4  | -0.8  |
| TRAK2    | 1  | 11.9  | 8.1   | 3.9  | 4.2   |
| C2orf42  | 0  | 7.4   | 3.3   | 4.1  | -0.8  |
| TIA1     | 1  | 96.5  | 91.3  | 5.2  | 86.1  |
| PCYOX1   | 1  | 16.7  | 13.2  | 3.5  | 9.7   |
| EPAS1    | 4  | 7.9   | 2.2   | 5.7  | -3.5  |
| ARID3A   | 0  | 19.0  | 7.9   | 11.2 | -3.3  |
| SUMO1    | 1  | 103.5 | 96.2  | 7.3  | 88.9  |
| NFE2L2   | 1  | 108.9 | 103.7 | 5.2  | 98.5  |
| MSH6     | 1  | 58.7  | 48.8  | 10.0 | 38.8  |
| PLEKHA3  | 6  | 27.7  | 4.4   | 23.3 | -18.8 |
| SPR      | 4  | 22.9  | 8.3   | 14.7 | -6.4  |
| FARSB    | 7  | 14.4  | 1.8   | 12.6 | -10.8 |
| ALMS1    | 1  | 17.3  | 12.0  | 5.4  | 6.6   |
| BCL9     | 9  | 13.8  | 2.9   | 10.9 | -8.0  |
| DHCR24   | 5  | 13.2  | 4.4   | 8.8  | -4.5  |
| DNAJC16  | 0  | 9.7   | 3.7   | 6.1  | -2.4  |
| CACYBP   | 1  | 59.5  | 41.8  | 17.6 | 24.2  |
| SCP2     | 1  | 62.3  | 59.2  | 3.1  | 56.0  |
| RALGPS2  | 1  | 16.1  | 12.6  | 3.5  | 9.1   |
| CEP104   | 6  | 15.8  | 5.0   | 10.8 | -5.8  |
| FAM20B   | 0  | 7.4   | 2.7   | 4.7  | -2.1  |
| TMEM59   | 1  | 10.3  | 6.7   | 3.6  | 3.2   |
| LRRC42   | 0  | 9.5   | 4.7   | 4.8  | -0.1  |
| WRAP73   | 2  | 12.8  | 4.8   | 8.0  | -3.2  |
| MRPL37   | 2  | 23.9  | 8.9   | 15.0 | -6.1  |
| ICMT     | 0  | 11.6  | 4.5   | 7.1  | -2.6  |
| RPL22    | 1  | 58.4  | 49.7  | 8.7  | 41.0  |
| QSOX1    | 3  | 11.3  | 5.3   | 6.0  | -0.7  |
| STXBP3   | 1  | 70.8  | 65.0  | 5.7  | 59.3  |
| PHF13    | 11 | 26.6  | 1.3   | 25.3 | -23.9 |
| ERRFI1   | 0  | 4.1   | 1.7   | 2.4  | -0.7  |
| PARK7    | 0  | 4.7   | 1.9   | 2.8  | -0.9  |
| AMPD2    | 0  | 8.4   | 3.3   | 5.1  | -1.8  |
| SRSF4    | 1  | 9.8   | 5.4   | 4.3  | 1.1   |
| MECR     | 0  | 10.3  | 4.3   | 6.1  | -1.8  |
| EDEM3    | 1  | 18.7  | 15.3  | 3.3  | 12.0  |
| WDR77    | 0  | 13.1  | 5.2   | 7.9  | -2.7  |
| ATP5F1   | 1  | 30.7  | 26.8  | 3.9  | 22.9  |

|          |   |       |       |      |       |
|----------|---|-------|-------|------|-------|
| RAP1A    | 1 | 27.4  | 24.6  | 2.8  | 21.8  |
| HDAC1    | 0 | 6.2   | 2.6   | 3.6  | -1.1  |
| CAPZA1   | 1 | 116.7 | 110.2 | 6.5  | 103.8 |
| S100BPB  | 0 | 13.0  | 3.0   | 10.0 | -6.9  |
| RNF19B   | 2 | 17.1  | 4.7   | 12.3 | -7.6  |
| SCAMP3   | 9 | 20.3  | 5.9   | 14.4 | -8.4  |
| ASH1L    | 1 | 14.4  | 9.4   | 5.0  | 4.4   |
| SFPQ     | 1 | 77.9  | 72.4  | 5.5  | 66.9  |
| RHOU     | 4 | 15.5  | 7.3   | 8.2  | -0.9  |
| GON4L    | 9 | 10.6  | 2.7   | 7.8  | -5.1  |
| ARHGEF2  | 9 | 9.0   | 1.0   | 8.1  | -7.1  |
| LAMTOR2  | 9 | 18.9  | 3.7   | 15.2 | -11.5 |
| MEF2D    | 9 | 14.2  | 2.7   | 11.5 | -8.8  |
| DOCK7    | 1 | 51.8  | 43.0  | 8.8  | 34.2  |
| SRM      | 0 | 12.2  | 5.6   | 6.6  | -1.0  |
| C1orf21  | 3 | 9.0   | 2.7   | 6.4  | -3.7  |
| MAD2L2   | 0 | 14.1  | 5.2   | 9.0  | -3.8  |
| IVNS1ABP | 1 | 18.3  | 14.2  | 4.1  | 10.1  |
| KIAA2013 | 2 | 39.6  | 19.7  | 19.9 | -0.2  |
| MFN2     | 0 | 12.3  | 5.4   | 6.9  | -1.5  |
| MIIP     | 2 | 26.9  | 12.6  | 14.3 | -1.8  |
| SMG7     | 9 | 9.6   | 1.1   | 8.5  | -7.4  |
| NCF2     | 3 | 7.7   | 2.6   | 5.1  | -2.6  |
| SLC35D1  | 4 | 15.2  | 5.1   | 10.1 | -4.9  |
| GADD45A  | 0 | 8.0   | 3.1   | 4.8  | -1.7  |
| WLS      | 3 | 8.5   | 3.6   | 4.9  | -1.3  |
| PRDM2    | 0 | 10.2  | 5.3   | 4.9  | 0.3   |
| RGS2     | 4 | 10.8  | 2.9   | 7.9  | -5.0  |
| TROVE2   | 1 | 28.3  | 24.9  | 3.3  | 21.6  |
| UCHL5    | 1 | 43.5  | 36.3  | 7.3  | 29.0  |
| BCAS2    | 1 | 56.9  | 51.4  | 5.5  | 45.9  |
| SRSF11   | 1 | 109.5 | 105.5 | 4.0  | 101.5 |
| CTH      | 0 | 7.9   | 3.4   | 4.5  | -1.1  |
| OLFML3   | 0 | 8.7   | 3.3   | 5.4  | -2.2  |
| PLEKHM2  | 3 | 16.7  | 4.2   | 12.4 | -8.2  |
| CRYZ     | 1 | 14.4  | 10.6  | 3.8  | 6.8   |
| PHTF1    | 1 | 8.1   | 5.0   | 3.1  | 1.9   |
| ZBTB17   | 2 | 18.6  | 6.5   | 12.1 | -5.5  |
| CD58     | 1 | 9.1   | 5.4   | 3.8  | 1.6   |
| TTF2     | 6 | 24.4  | 3.0   | 21.4 | -18.4 |
| TMEM9    | 9 | 7.0   | 0.6   | 6.4  | -5.7  |
| ADPRHL2  | 2 | 20.0  | 7.2   | 12.8 | -5.6  |
| MAP7D1   | 3 | 24.5  | 15.1  | 9.4  | 5.7   |
| WARS2    | 0 | 7.4   | 2.4   | 5.0  | -2.6  |
| MRPS15   | 0 | 16.4  | 6.4   | 10.0 | -3.6  |
| GNPAT    | 0 | 6.6   | 2.2   | 4.5  | -2.3  |
| TSNAX    | 1 | 53.7  | 50.1  | 3.7  | 46.4  |
| C1orf109 | 0 | 9.4   | 4.3   | 5.2  | -0.9  |
| RRAGC    | 0 | 9.3   | 3.4   | 5.9  | -2.5  |
| TBCE     | 1 | 17.6  | 10.5  | 7.1  | 3.4   |
| NID1     | 0 | 8.9   | 4.0   | 4.9  | -1.0  |
| LGALS8   | 1 | 6.4   | 3.4   | 3.0  | 0.4   |
| MTR      | 1 | 13.8  | 8.8   | 5.0  | 3.9   |
| SIPA1L2  | 0 | 5.0   | 2.2   | 2.8  | -0.5  |

|          |   |      |      |      |       |
|----------|---|------|------|------|-------|
| AKT3     | 3 | 21.2 | 7.1  | 14.1 | -7.0  |
| ETV3     | 9 | 8.0  | 2.1  | 5.9  | -3.8  |
| ACADM    | 1 | 62.4 | 58.1 | 4.3  | 53.8  |
| ADGRL2   | 1 | 8.2  | 4.9  | 3.4  | 1.5   |
| SDHB     | 6 | 24.5 | 8.2  | 16.3 | -8.1  |
| MFAP2    | 0 | 10.6 | 5.2  | 5.4  | -0.2  |
| RPF1     | 1 | 42.8 | 37.3 | 5.4  | 31.9  |
| KDM5B    | 0 | 8.2  | 4.2  | 4.0  | 0.1   |
| UAP1     | 1 | 23.0 | 17.8 | 5.2  | 12.6  |
| CTBS     | 0 | 7.5  | 3.0  | 4.5  | -1.6  |
| KLHL12   | 0 | 7.9  | 3.6  | 4.3  | -0.7  |
| SSX2IP   | 1 | 18.2 | 13.4 | 4.8  | 8.5   |
| ZNHIT6   | 1 | 18.7 | 14.8 | 3.9  | 10.9  |
| RBBP5    | 0 | 8.7  | 3.7  | 5.0  | -1.4  |
| GBP3     | 3 | 10.6 | 3.5  | 7.1  | -3.7  |
| GBP1     | 0 | 11.6 | 2.1  | 9.4  | -7.3  |
| GPR89A   | 2 | 11.9 | 3.2  | 8.7  | -5.6  |
| CDK18    | 0 | 10.8 | 4.0  | 6.9  | -2.9  |
| RAB29    | 0 | 10.6 | 4.8  | 5.8  | -1.0  |
| ECE1     | 3 | 15.0 | 7.9  | 7.1  | 0.8   |
| HMGCL    | 2 | 21.5 | 7.0  | 14.6 | -7.6  |
| GALE     | 0 | 11.9 | 4.1  | 7.8  | -3.7  |
| ID3      | 0 | 8.9  | 3.2  | 5.6  | -2.4  |
| CD46     | 1 | 85.7 | 82.4 | 3.4  | 79.0  |
| PRPF3    | 9 | 10.0 | 2.9  | 7.2  | -4.3  |
| APH1A    | 9 | 19.6 | 4.4  | 15.2 | -10.8 |
| P3H1     | 0 | 7.7  | 4.1  | 3.6  | 0.5   |
| SLC2A1   | 3 | 7.6  | 3.2  | 4.4  | -1.2  |
| EBNA1BP2 | 0 | 14.0 | 5.8  | 8.2  | -2.5  |
| CDC20    | 5 | 28.2 | 17.2 | 10.9 | 6.3   |
| IPO13    | 0 | 11.3 | 5.3  | 6.0  | -0.7  |
| ATP6VOB  | 2 | 15.5 | 5.6  | 9.9  | -4.3  |
| B4GALT2  | 2 | 21.6 | 8.3  | 13.2 | -4.9  |
| ERI3     | 2 | 17.7 | 5.7  | 12.0 | -6.3  |
| AKR1A1   | 0 | 7.4  | 3.5  | 4.0  | -0.5  |
| PRDX1    | 1 | 16.7 | 8.2  | 8.6  | -0.4  |
| BLZF1    | 1 | 20.2 | 15.7 | 4.5  | 11.3  |
| SLC19A2  | 4 | 15.5 | 3.8  | 11.7 | -7.8  |
| NSUN4    | 2 | 13.0 | 4.6  | 8.4  | -3.8  |
| TMED5    | 1 | 47.6 | 43.8 | 3.8  | 40.0  |
| DR1      | 1 | 18.6 | 14.7 | 3.9  | 10.8  |
| CNN3     | 1 | 23.3 | 16.6 | 6.7  | 9.9   |
| PRRC2C   | 1 | 54.1 | 50.3 | 3.8  | 46.5  |
| F3       | 1 | 7.1  | 3.5  | 3.7  | -0.2  |
| ABCD3    | 1 | 32.3 | 27.8 | 4.5  | 23.3  |
| VAMP4    | 0 | 7.9  | 2.2  | 5.6  | -3.4  |
| DPH5     | 0 | 14.4 | 4.2  | 10.2 | -6.0  |
| PTBP2    | 1 | 24.3 | 20.3 | 4.0  | 16.4  |
| PRDX6    | 9 | 8.1  | 0.8  | 7.2  | -6.4  |
| DARS2    | 7 | 10.9 | 0.9  | 10.0 | -9.1  |
| DIEXF    | 0 | 6.2  | 2.2  | 4.0  | -1.8  |
| RCAN3    | 0 | 6.2  | 2.5  | 3.6  | -1.1  |
| SYF2     | 1 | 23.9 | 20.8 | 3.2  | 17.6  |
| RSRP1    | 1 | 21.4 | 17.7 | 3.7  | 14.0  |

|          |   |      |      |      |       |
|----------|---|------|------|------|-------|
| SLC35A3  | 1 | 30.0 | 25.4 | 4.6  | 20.8  |
| RCOR3    | 1 | 16.8 | 12.9 | 3.8  | 9.1   |
| STMN1    | 5 | 9.2  | 2.0  | 7.1  | -5.1  |
| MTFR1L   | 0 | 12.3 | 6.5  | 5.8  | 0.7   |
| NEK2     | 7 | 22.8 | 4.5  | 18.2 | -13.7 |
| RPS6KA1  | 2 | 28.1 | 13.5 | 14.6 | -1.2  |
| DHDDS    | 0 | 12.0 | 5.3  | 6.7  | -1.4  |
| NENF     | 0 | 14.4 | 6.0  | 8.4  | -2.4  |
| NSL1     | 1 | 16.2 | 11.3 | 4.9  | 6.4   |
| ARID1A   | 0 | 9.1  | 4.8  | 4.2  | 0.6   |
| CENPF    | 7 | 58.4 | 9.2  | 49.1 | -39.9 |
| RPA2     | 0 | 11.5 | 4.9  | 6.7  | -1.8  |
| PPP1R8   | 1 | 10.5 | 5.3  | 5.2  | 0.1   |
| STX12    | 3 | 8.3  | 2.6  | 5.7  | -3.2  |
| OSBPL9   | 1 | 79.2 | 72.2 | 7.0  | 65.1  |
| TXNDC12  | 1 | 7.9  | 4.3  | 3.6  | 0.7   |
| ESYT2    | 0 | 8.0  | 2.4  | 5.6  | -3.1  |
| CD3EAP   | 2 | 15.0 | 5.0  | 10.0 | -5.1  |
| MESDC2   | 4 | 9.9  | 2.5  | 7.4  | -4.8  |
| RCN2     | 1 | 43.8 | 39.7 | 4.2  | 35.5  |
| CTSD     | 3 | 20.7 | 7.4  | 13.3 | -5.9  |
| STAG1    | 1 | 26.2 | 22.4 | 3.8  | 18.5  |
| STK11    | 8 | 16.0 | 4.6  | 11.4 | -6.8  |
| KMT2A    | 1 | 15.1 | 9.0  | 6.1  | 2.9   |
| IFT46    | 0 | 12.7 | 6.9  | 5.8  | 1.2   |
| KPTN     | 0 | 9.4  | 4.2  | 5.1  | -0.9  |
| RPS25    | 1 | 17.1 | 9.0  | 8.1  | 0.9   |
| KIF14    | 7 | 34.5 | 7.5  | 27.0 | -19.5 |
| DDX59    | 1 | 8.4  | 4.1  | 4.3  | -0.2  |
| CAMSAP2  | 1 | 31.0 | 26.0 | 5.0  | 21.0  |
| ATF6     | 3 | 7.8  | 2.2  | 5.6  | -3.5  |
| FASTKD2  | 1 | 34.0 | 27.0 | 7.1  | 19.9  |
| NRP2     | 3 | 11.9 | 4.7  | 7.2  | -2.4  |
| CREB1    | 1 | 50.6 | 43.3 | 7.3  | 36.0  |
| KLF7     | 1 | 12.5 | 7.2  | 5.3  | 1.9   |
| SPCS2    | 1 | 84.2 | 75.2 | 9.1  | 66.1  |
| HMG3     | 1 | 14.3 | 10.1 | 4.2  | 5.9   |
| ANKRD13C | 1 | 24.0 | 20.7 | 3.3  | 17.3  |
| PHF3     | 1 | 42.9 | 38.8 | 4.1  | 34.7  |
| TNFAIP3  | 0 | 5.3  | 2.6  | 2.7  | -0.2  |
| RAB32    | 0 | 6.9  | 2.5  | 4.3  | -1.8  |
| SGK1     | 0 | 6.6  | 2.0  | 4.6  | -2.6  |
| RNF146   | 1 | 20.2 | 17.3 | 2.9  | 14.4  |
| CTGF     | 0 | 5.4  | 2.0  | 3.3  | -1.3  |
| PMFBP1   | 2 | 17.8 | 6.0  | 11.8 | -5.8  |
| FBXL5    | 3 | 13.3 | 6.0  | 7.3  | -1.3  |
| MED28    | 0 | 8.9  | 4.1  | 4.8  | -0.7  |
| TMEM5    | 0 | 8.4  | 2.7  | 5.7  | -2.9  |
| VAMP8    | 4 | 12.6 | 4.4  | 8.3  | -3.9  |
| DCLRE1B  | 0 | 13.4 | 5.2  | 8.2  | -3.0  |
| MYL12B   | 0 | 4.4  | 2.0  | 2.4  | -0.5  |
| FOXO3    | 0 | 8.3  | 3.5  | 4.8  | -1.3  |
| RPN2     | 1 | 14.7 | 9.1  | 5.6  | 3.5   |
| TGIF2    | 0 | 15.4 | 6.2  | 9.2  | -3.1  |



|          |    |      |      |      |       |
|----------|----|------|------|------|-------|
| PKD2     | 1  | 15.7 | 11.1 | 4.6  | 6.5   |
| SPP1     | 0  | 6.7  | 2.8  | 3.9  | -1.1  |
| CCNI     | 1  | 17.8 | 10.5 | 7.3  | 3.2   |
| MFS1     | 3  | 11.5 | 3.3  | 8.2  | -4.8  |
| RAB3GAP2 | 1  | 37.6 | 33.9 | 3.7  | 30.2  |
| EEF2KMT  | 12 | 20.0 | 3.6  | 16.4 | -12.7 |
| UBN1     | 0  | 9.8  | 4.8  | 4.9  | -0.1  |
| UCL3     | 1  | 12.0 | 6.7  | 5.3  | 1.4   |
| HS1BP3   | 0  | 11.8 | 5.0  | 6.8  | -1.8  |
| LDAH     | 1  | 12.0 | 8.9  | 3.1  | 5.7   |
| ELL2     | 1  | 15.1 | 12.2 | 2.9  | 9.2   |
| CYP20A1  | 7  | 10.6 | 1.1  | 9.4  | -8.3  |
| NDUFB3   | 1  | 17.2 | 10.2 | 7.0  | 3.2   |
| GTF3C3   | 1  | 70.9 | 60.0 | 10.9 | 49.1  |
| UBE2B    | 1  | 73.3 | 63.7 | 9.6  | 54.1  |
| TJP2     | 0  | 10.9 | 3.1  | 7.8  | -4.7  |
| ITGB1BP1 | 7  | 18.7 | 2.3  | 16.3 | -14.0 |
| CPSF3    | 1  | 25.2 | 19.7 | 5.5  | 14.3  |
| SENP5    | 1  | 14.6 | 10.0 | 4.7  | 5.3   |
| CCDC92   | 8  | 9.9  | 1.7  | 8.2  | -6.6  |
| C1orf198 | 0  | 7.2  | 2.9  | 4.3  | -1.4  |
| HEATR1   | 1  | 21.3 | 16.0 | 5.3  | 10.7  |
| PTBP3    | 1  | 40.3 | 36.1 | 4.2  | 31.8  |
| RAD23B   | 1  | 34.6 | 30.6 | 3.9  | 26.7  |
| FKBP15   | 10 | 12.7 | 2.8  | 9.9  | -7.1  |
| CTNNA1   | 7  | 16.4 | 2.7  | 13.8 | -11.1 |
| FAM206A  | 1  | 26.5 | 21.4 | 5.1  | 16.3  |
| WDR34    | 10 | 22.5 | 2.5  | 20.1 | -17.6 |
| SET      | 1  | 32.0 | 27.3 | 4.8  | 22.5  |
| PPP2R4   | 10 | 15.3 | 3.6  | 11.7 | -8.1  |
| GLE1     | 10 | 16.9 | 4.5  | 12.3 | -7.8  |
| RAB14    | 1  | 10.3 | 6.5  | 3.8  | 2.7   |
| TRIM32   | 10 | 17.6 | 2.5  | 15.1 | -12.6 |
| FBXW2    | 1  | 11.4 | 6.9  | 4.4  | 2.5   |
| PHF19    | 5  | 11.4 | 2.2  | 9.1  | -6.9  |
| NEK6     | 3  | 15.5 | 8.2  | 7.3  | 0.9   |
| PPP6C    | 6  | 20.2 | 3.0  | 17.1 | -14.1 |
| NDUFA8   | 10 | 14.2 | 3.8  | 10.4 | -6.6  |
| HDHD3    | 4  | 31.2 | 10.9 | 20.3 | -9.5  |
| RBM18    | 6  | 24.8 | 3.7  | 21.0 | -17.3 |
| HSDL2    | 1  | 23.4 | 19.2 | 4.2  | 15.0  |
| MAPKAP1  | 0  | 5.4  | 1.9  | 3.6  | -1.7  |
| INVS     | 10 | 10.2 | 1.3  | 9.0  | -7.7  |
| DENND1A  | 10 | 14.6 | 1.8  | 12.8 | -11.1 |
| ALG2     | 10 | 12.1 | 1.7  | 10.4 | -8.7  |
| KDSR     | 3  | 11.8 | 5.1  | 6.8  | -1.7  |
| VPS4B    | 1  | 15.6 | 12.2 | 3.4  | 8.8   |
| C19orf25 | 8  | 27.3 | 8.0  | 19.3 | -11.3 |
| ZBTB45   | 2  | 39.6 | 18.4 | 21.3 | -2.9  |
| YLPM1    | 0  | 10.6 | 4.8  | 5.8  | -0.9  |
| DCAF4    | 0  | 7.6  | 2.8  | 4.8  | -1.9  |
| FCF1     | 1  | 23.5 | 19.5 | 4.0  | 15.5  |
| IFI27L2  | 3  | 17.4 | 9.2  | 8.2  | 1.0   |
| NEK9     | 0  | 8.0  | 4.1  | 3.9  | 0.2   |

|          |   |      |      |      |       |
|----------|---|------|------|------|-------|
| ACYP1    | 0 | 9.3  | 2.9  | 6.4  | -3.5  |
| IFT43    | 0 | 13.5 | 5.2  | 8.3  | -3.0  |
| NPC2     | 3 | 8.1  | 2.6  | 5.5  | -2.9  |
| DNAL1    | 0 | 7.4  | 3.0  | 4.4  | -1.4  |
| IRF2BPL  | 0 | 16.7 | 6.7  | 10.0 | -3.3  |
| ACOT2    | 4 | 27.8 | 5.9  | 21.9 | -16.0 |
| AREL1    | 0 | 12.0 | 6.6  | 5.3  | 1.3   |
| MLH3     | 1 | 10.4 | 7.3  | 3.1  | 4.2   |
| TTLL5    | 7 | 8.6  | 0.7  | 7.9  | -7.2  |
| ABCD4    | 0 | 8.1  | 3.8  | 4.3  | -0.5  |
| DLST     | 0 | 9.4  | 4.8  | 4.7  | 0.1   |
| SLIRP    | 1 | 18.8 | 11.2 | 7.6  | 3.5   |
| RBM25    | 1 | 85.3 | 80.4 | 4.9  | 75.5  |
| EIF2B2   | 0 | 11.3 | 4.9  | 6.4  | -1.5  |
| NRDE2    | 0 | 9.4  | 4.4  | 5.0  | -0.6  |
| COQ6     | 2 | 27.7 | 13.3 | 14.4 | -1.0  |
| ZNF410   | 0 | 9.9  | 2.9  | 7.0  | -4.1  |
| RHOQ     | 1 | 15.6 | 11.8 | 3.8  | 8.0   |
| SUPT7L   | 0 | 7.7  | 3.5  | 4.2  | -0.7  |
| KLHL29   | 2 | 14.2 | 4.2  | 10.0 | -5.8  |
| DNMT3A   | 0 | 13.2 | 6.7  | 6.5  | 0.2   |
| TMEM214  | 0 | 11.0 | 5.7  | 5.3  | 0.4   |
| FKBP1B   | 0 | 7.8  | 3.6  | 4.1  | -0.5  |
| ATL2     | 1 | 53.9 | 49.8 | 4.2  | 45.6  |
| YPEL5    | 1 | 17.2 | 9.2  | 8.0  | 1.3   |
| FAM98A   | 1 | 42.7 | 39.3 | 3.4  | 35.9  |
| YIPF4    | 1 | 33.5 | 29.1 | 4.4  | 24.8  |
| AFTPH    | 1 | 13.6 | 9.7  | 3.9  | 5.8   |
| LGALS1   | 4 | 17.7 | 4.1  | 13.5 | -9.4  |
| CRIP1    | 1 | 14.2 | 8.5  | 5.7  | 2.8   |
| SLC17A5  | 0 | 8.5  | 4.3  | 4.2  | 0.1   |
| OGFRL1   | 3 | 13.4 | 3.9  | 9.6  | -5.7  |
| SLF2     | 1 | 16.1 | 9.6  | 6.5  | 3.0   |
| IDE      | 1 | 36.5 | 30.6 | 5.9  | 24.7  |
| IFIT3    | 3 | 10.1 | 3.3  | 6.8  | -3.4  |
| CUTC     | 0 | 9.7  | 3.3  | 6.4  | -3.1  |
| PPP1R3C  | 0 | 5.2  | 2.0  | 3.2  | -1.2  |
| MXI1     | 0 | 6.7  | 3.0  | 3.6  | -0.6  |
| SMNDC1   | 0 | 10.8 | 3.6  | 7.2  | -3.6  |
| C10orf88 | 1 | 16.6 | 9.9  | 6.7  | 3.2   |
| HELLS    | 7 | 38.2 | 6.1  | 32.0 | -25.9 |
| TCTN3    | 0 | 7.5  | 4.0  | 3.5  | 0.6   |
| FAM45A   | 1 | 15.5 | 11.8 | 3.8  | 8.0   |
| AVPI1    | 2 | 17.0 | 6.8  | 10.3 | -3.5  |
| WDR11    | 1 | 33.9 | 29.0 | 4.9  | 24.1  |
| C10orf76 | 0 | 16.2 | 7.3  | 8.9  | -1.6  |
| GOT1     | 4 | 12.7 | 3.1  | 9.6  | -6.5  |
| GNA13    | 1 | 41.9 | 37.8 | 4.1  | 33.8  |
| KANSL1   | 0 | 12.2 | 4.7  | 7.4  | -2.7  |
| DUSP1    | 0 | 6.4  | 2.6  | 3.9  | -1.3  |
| PANK3    | 1 | 71.0 | 59.6 | 11.4 | 48.2  |
| RCL1     | 0 | 8.7  | 3.7  | 5.1  | -1.4  |
| CAAP1    | 1 | 8.7  | 5.6  | 3.0  | 2.6   |
| NUP43    | 1 | 21.7 | 14.1 | 7.6  | 6.4   |

|           |   |      |      |      |       |
|-----------|---|------|------|------|-------|
| MTHFD1L   | 0 | 8.4  | 3.6  | 4.8  | -1.3  |
| LRP11     | 1 | 9.7  | 5.7  | 4.1  | 1.6   |
| PCMT1     | 1 | 29.1 | 23.2 | 5.9  | 17.3  |
| CYSTM1    | 4 | 15.9 | 5.2  | 10.8 | -5.6  |
| WDR55     | 2 | 18.3 | 8.0  | 10.3 | -2.2  |
| MRPS14    | 0 | 9.5  | 3.2  | 6.3  | -3.1  |
| CENPL     | 0 | 10.4 | 2.9  | 7.5  | -4.7  |
| GORAB     | 1 | 13.4 | 10.0 | 3.4  | 6.7   |
| ACAT2     | 5 | 12.0 | 3.7  | 8.2  | -4.5  |
| TCP1      | 1 | 18.7 | 13.3 | 5.5  | 7.8   |
| SNX19     | 3 | 11.1 | 4.7  | 6.4  | -1.8  |
| PDZD11    | 3 | 16.4 | 4.4  | 12.0 | -7.7  |
| NUDCD1    | 1 | 20.8 | 15.8 | 5.0  | 10.8  |
| ENY2      | 1 | 35.4 | 32.4 | 3.0  | 29.4  |
| MASTL     | 7 | 21.0 | 3.7  | 17.3 | -13.6 |
| KIAA1217  | 0 | 6.2  | 2.7  | 3.4  | -0.7  |
| EPC1      | 1 | 13.4 | 10.6 | 2.8  | 7.8   |
| CCDC77    | 1 | 32.9 | 26.5 | 6.4  | 20.2  |
| TAF12     | 0 | 6.9  | 3.0  | 3.9  | -0.8  |
| MTRF1     | 1 | 15.6 | 10.8 | 4.8  | 6.0   |
| DNAJC15   | 0 | 6.9  | 2.7  | 4.2  | -1.5  |
| PROSER1   | 1 | 11.6 | 5.9  | 5.7  | 0.2   |
| UFM1      | 1 | 38.6 | 35.0 | 3.6  | 31.4  |
| WBP4      | 1 | 20.4 | 15.4 | 5.0  | 10.4  |
| ELF1      | 1 | 14.2 | 8.4  | 5.8  | 2.6   |
| HSPH1     | 1 | 97.9 | 87.0 | 10.9 | 76.1  |
| ALG5      | 0 | 10.8 | 3.2  | 7.6  | -4.5  |
| EXOSC8    | 1 | 59.4 | 44.8 | 14.6 | 30.2  |
| ETF1      | 1 | 81.7 | 75.5 | 6.2  | 69.4  |
| TGFBI     | 3 | 9.2  | 4.1  | 5.1  | -1.0  |
| FAM53C    | 2 | 14.1 | 4.8  | 9.3  | -4.5  |
| SIL1      | 0 | 7.9  | 4.0  | 3.9  | 0.1   |
| PAIP2     | 1 | 82.7 | 75.7 | 7.0  | 68.8  |
| KDM3B     | 0 | 8.4  | 3.3  | 5.1  | -1.9  |
| EGR1      | 0 | 8.5  | 3.5  | 5.0  | -1.4  |
| SERP1     | 4 | 10.7 | 2.5  | 8.2  | -5.7  |
| PLS1      | 4 | 12.4 | 3.6  | 8.8  | -5.2  |
| NR2C1     | 1 | 42.2 | 38.3 | 3.8  | 34.5  |
| UTP20     | 1 | 28.0 | 18.8 | 9.2  | 9.6   |
| TMPO      | 7 | 28.4 | 4.3  | 24.2 | -19.9 |
| ARL1      | 1 | 71.4 | 66.6 | 4.8  | 61.8  |
| MTERF2    | 1 | 21.2 | 16.2 | 5.0  | 11.2  |
| SOCS2     | 0 | 6.4  | 2.5  | 3.9  | -1.4  |
| NFYB      | 1 | 50.7 | 42.0 | 8.7  | 33.3  |
| CCDC53    | 1 | 10.7 | 5.2  | 5.5  | -0.3  |
| APAF1     | 1 | 15.8 | 10.7 | 5.1  | 5.6   |
| DUSP4     | 0 | 5.7  | 2.6  | 3.0  | -0.4  |
| CLU       | 5 | 5.9  | 1.1  | 4.8  | -3.7  |
| TNFRSF10B | 0 | 7.1  | 3.4  | 3.7  | -0.2  |
| SORBS3    | 0 | 7.0  | 3.0  | 4.0  | -0.9  |
| PPP3CC    | 0 | 6.2  | 2.9  | 3.3  | -0.4  |
| PDLIM2    | 0 | 13.2 | 5.6  | 7.5  | -1.9  |
| RNF170    | 1 | 9.4  | 5.6  | 3.8  | 1.8   |
| UBIAD1    | 2 | 31.1 | 15.5 | 15.6 | -0.1  |

|          |    |       |       |      |       |
|----------|----|-------|-------|------|-------|
| TARDBP   | 1  | 122.0 | 114.9 | 7.1  | 107.7 |
| ZNF706   | 1  | 10.9  | 6.4   | 4.5  | 1.9   |
| LYPLA1   | 1  | 56.0  | 51.9  | 4.1  | 47.9  |
| COPS5    | 1  | 23.1  | 20.4  | 2.8  | 17.6  |
| RDH10    | 0  | 7.1   | 2.7   | 4.4  | -1.7  |
| AKAP1    | 4  | 14.9  | 4.7   | 10.1 | -5.4  |
| COIL     | 1  | 11.6  | 5.9   | 5.8  | 0.1   |
| TRIM25   | 0  | 9.5   | 4.2   | 5.4  | -1.2  |
| SCPEP1   | 0  | 7.3   | 3.1   | 4.1  | -1.0  |
| SPOP     | 1  | 14.1  | 11.0  | 3.1  | 7.8   |
| SLC35B1  | 0  | 7.5   | 2.5   | 5.0  | -2.5  |
| NCAPH    | 5  | 30.1  | 14.3  | 15.9 | -1.6  |
| KIAA0922 | 0  | 8.3   | 3.9   | 4.4  | -0.6  |
| MND1     | 7  | 23.0  | 4.2   | 18.8 | -14.6 |
| TRIM6    | 3  | 6.4   | 1.8   | 4.6  | -2.8  |
| CEP89    | 3  | 9.8   | 2.8   | 7.1  | -4.3  |
| ECHDC2   | 0  | 9.7   | 4.5   | 5.2  | -0.7  |
| PYROXD1  | 1  | 12.8  | 10.0  | 2.8  | 7.2   |
| PSPC1    | 0  | 11.1  | 4.1   | 7.1  | -3.0  |
| ZNF211   | 0  | 6.7   | 3.3   | 3.4  | -0.1  |
| RNF2     | 1  | 16.8  | 11.7  | 5.1  | 6.6   |
| TRMT1L   | 1  | 20.4  | 14.9  | 5.5  | 9.4   |
| SEC22A   | 0  | 9.3   | 4.0   | 5.3  | -1.3  |
| B4GALT4  | 0  | 6.6   | 2.0   | 4.6  | -2.6  |
| NAA50    | 1  | 29.1  | 25.6  | 3.6  | 22.0  |
| KIF18A   | 7  | 32.8  | 7.0   | 25.8 | -18.8 |
| DESI2    | 1  | 14.6  | 10.5  | 4.0  | 6.5   |
| MAPK8IP1 | 0  | 13.3  | 5.3   | 8.0  | -2.7  |
| CRY2     | 2  | 33.0  | 13.6  | 19.3 | -5.7  |
| PEX16    | 2  | 14.7  | 5.4   | 9.3  | -3.9  |
| CAT      | 4  | 8.8   | 3.3   | 5.5  | -2.3  |
| PILRB    | 0  | 9.6   | 3.8   | 5.8  | -2.1  |
| ZMYM2    | 1  | 54.7  | 50.6  | 4.1  | 46.6  |
| TBC1D15  | 1  | 71.2  | 65.0  | 6.2  | 58.8  |
| ZCCHC17  | 0  | 12.8  | 5.3   | 7.5  | -2.1  |
| KHDRBS1  | 1  | 20.4  | 14.9  | 5.5  | 9.4   |
| TMEM39B  | 10 | 14.9  | 1.1   | 13.7 | -12.6 |
| POLR3GL  | 3  | 11.0  | 3.0   | 8.0  | -5.0  |
| TNFSF10  | 0  | 8.3   | 3.3   | 5.0  | -1.7  |
| ZNF639   | 1  | 24.5  | 21.8  | 2.7  | 19.1  |
| PIK3CA   | 1  | 16.3  | 13.2  | 3.1  | 10.1  |
| PDS5A    | 1  | 69.5  | 61.3  | 8.2  | 53.1  |
| TMEM156  | 3  | 7.8   | 2.6   | 5.2  | -2.6  |
| LIAS     | 0  | 8.2   | 2.5   | 5.7  | -3.3  |
| TMEM54   | 3  | 15.7  | 5.2   | 10.5 | -5.2  |
| LRIF1    | 1  | 13.2  | 8.5   | 4.6  | 3.9   |
| CLCC1    | 1  | 35.0  | 26.5  | 8.5  | 18.0  |
| GPSM2    | 7  | 22.5  | 3.7   | 18.8 | -15.0 |
| GTDC1    | 1  | 9.2   | 5.7   | 3.5  | 2.2   |
| POLK     | 1  | 32.2  | 26.2  | 5.9  | 20.3  |
| RPL21    | 1  | 21.9  | 16.6  | 5.3  | 11.3  |
| MTIF3    | 1  | 12.9  | 9.7   | 3.2  | 6.5   |
| GTF3A    | 0  | 10.6  | 4.3   | 6.3  | -1.9  |
| RASL11A  | 4  | 11.1  | 3.3   | 7.8  | -4.4  |

|           |    |       |       |      |       |
|-----------|----|-------|-------|------|-------|
| UBL3      | 1  | 12.0  | 9.6   | 2.4  | 7.2   |
| FYTTD1    | 1  | 53.0  | 48.1  | 4.9  | 43.2  |
| MTERF4    | 0  | 8.7   | 3.3   | 5.4  | -2.0  |
| OCRL      | 0  | 5.6   | 2.8   | 2.8  | 0.0   |
| MRPS2     | 10 | 27.2  | 8.1   | 19.1 | -11.0 |
| KIAA1191  | 0  | 7.7   | 3.6   | 4.1  | -0.5  |
| COPA      | 9  | 9.6   | 1.3   | 8.2  | -6.9  |
| RBBP6     | 1  | 17.7  | 13.8  | 3.9  | 10.0  |
| ZC3H7A    | 1  | 58.2  | 53.8  | 4.4  | 49.5  |
| ANXA11    | 5  | 10.0  | 2.1   | 7.9  | -5.8  |
| FAM35A    | 0  | 11.3  | 4.2   | 7.1  | -2.9  |
| FAM213A   | 0  | 5.7   | 2.0   | 3.7  | -1.7  |
| ZNF205    | 12 | 24.7  | 3.2   | 21.5 | -18.3 |
| NAA60     | 4  | 11.9  | 4.2   | 7.7  | -3.4  |
| RPL5      | 1  | 29.1  | 22.5  | 6.6  | 15.9  |
| ODF2L     | 1  | 15.4  | 11.3  | 4.0  | 7.3   |
| TRMT13    | 1  | 23.4  | 19.7  | 3.7  | 16.0  |
| RWDD3     | 1  | 29.6  | 23.2  | 6.3  | 16.9  |
| ZNF644    | 1  | 64.4  | 58.0  | 6.4  | 51.7  |
| CCDC18    | 1  | 46.2  | 37.2  | 9.0  | 28.2  |
| RPAP2     | 1  | 36.5  | 26.8  | 9.8  | 17.0  |
| PQLC1     | 2  | 35.8  | 18.2  | 17.5 | 0.7   |
| PMS2      | 0  | 11.1  | 4.7   | 6.4  | -1.7  |
| ZMIZ2     | 3  | 18.4  | 7.2   | 11.2 | -4.1  |
| 7-Sep     | 1  | 117.8 | 112.0 | 5.8  | 106.1 |
| EEPDI     | 0  | 13.5  | 5.6   | 7.8  | -2.2  |
| KLHL7     | 1  | 12.1  | 6.9   | 5.2  | 1.7   |
| HERPUD2   | 0  | 7.5   | 2.8   | 4.7  | -1.9  |
| CBX3      | 1  | 101.0 | 95.9  | 5.1  | 90.8  |
| HNRNPA2B1 | 1  | 108.6 | 101.9 | 6.7  | 95.1  |
| FAM126A   | 1  | 25.5  | 19.3  | 6.2  | 13.1  |
| FKBP9     | 0  | 8.6   | 3.8   | 4.8  | -1.0  |
| NT5C3A    | 1  | 14.0  | 9.5   | 4.5  | 5.1   |
| ARL4A     | 0  | 6.3   | 2.3   | 4.0  | -1.7  |
| POLM      | 2  | 19.7  | 7.1   | 12.6 | -5.4  |
| FTSJ2     | 0  | 10.0  | 3.7   | 6.4  | -2.7  |
| SMU1      | 0  | 7.6   | 3.2   | 4.4  | -1.2  |
| GLIPR2    | 3  | 15.9  | 8.2   | 7.7  | 0.5   |
| SLC25A51  | 0  | 8.0   | 3.4   | 4.6  | -1.2  |
| CLTA      | 0  | 11.6  | 4.2   | 7.4  | -3.2  |
| ACO1      | 3  | 5.8   | 2.0   | 3.8  | -1.8  |
| DCAF10    | 0  | 7.1   | 2.6   | 4.6  | -2.0  |
| KIAA1549  | 0  | 13.5  | 6.0   | 7.5  | -1.4  |
| TRIM24    | 1  | 17.1  | 10.1  | 7.1  | 3.0   |
| C7orf49   | 0  | 8.4   | 3.4   | 5.0  | -1.5  |
| CALD1     | 1  | 78.2  | 73.6  | 4.7  | 68.9  |
| PLAU      | 3  | 14.9  | 7.7   | 7.1  | 0.6   |
| SRGN      | 0  | 7.9   | 1.8   | 6.0  | -4.2  |
| CHST3     | 0  | 10.3  | 3.6   | 6.7  | -3.1  |
| BICC1     | 3  | 14.9  | 7.3   | 7.6  | -0.2  |
| CISD1     | 6  | 20.3  | 5.8   | 14.5 | -8.7  |
| ECD       | 7  | 13.8  | 1.3   | 12.4 | -11.1 |
| P4HA1     | 1  | 18.4  | 14.5  | 3.9  | 10.5  |
| SLC25A16  | 1  | 10.1  | 6.2   | 3.9  | 2.3   |

|          |   |      |      |      |       |
|----------|---|------|------|------|-------|
| ZWINT    | 5 | 30.5 | 19.7 | 10.9 | 8.8   |
| VPS26A   | 1 | 64.9 | 55.0 | 9.9  | 45.1  |
| RBM19    | 2 | 20.7 | 6.7  | 14.0 | -7.3  |
| CIT      | 7 | 12.6 | 1.3  | 11.3 | -10.0 |
| IFT81    | 1 | 18.8 | 15.2 | 3.6  | 11.6  |
| ACADS    | 4 | 31.3 | 8.4  | 23.0 | -14.6 |
| DDX54    | 5 | 17.6 | 5.6  | 12.0 | -6.4  |
| MED13L   | 1 | 24.1 | 19.7 | 4.4  | 15.2  |
| CDKN2C   | 3 | 13.6 | 5.0  | 8.5  | -3.5  |
| RNF11    | 1 | 17.9 | 10.9 | 6.9  | 4.0   |
| RASSF8   | 1 | 17.7 | 13.2 | 4.5  | 8.6   |
| BHLHE41  | 3 | 13.2 | 6.2  | 7.0  | -0.8  |
| ITPR2    | 1 | 6.5  | 4.1  | 2.4  | 1.7   |
| CCDC91   | 1 | 17.6 | 15.2 | 2.4  | 12.8  |
| WWP1     | 1 | 21.6 | 16.8 | 4.8  | 12.0  |
| ACOT9    | 0 | 8.4  | 3.6  | 4.8  | -1.3  |
| PRDX4    | 0 | 7.5  | 3.8  | 3.7  | 0.1   |
| DDX39A   | 8 | 19.2 | 5.7  | 13.5 | -7.8  |
| PKN1     | 8 | 12.4 | 2.3  | 10.1 | -7.8  |
| C19orf43 | 8 | 25.5 | 11.3 | 14.1 | -2.8  |
| ADGRE5   | 0 | 15.5 | 5.5  | 10.0 | -4.5  |
| WDR83    | 8 | 21.8 | 5.9  | 15.9 | -10.1 |
| GIPC1    | 8 | 11.5 | 2.4  | 9.1  | -6.7  |
| SPRYD7   | 0 | 8.1  | 3.1  | 5.0  | -1.9  |
| EBPL     | 0 | 15.0 | 6.0  | 8.9  | -2.9  |
| ZC3H13   | 1 | 24.3 | 20.4 | 3.8  | 16.6  |
| NLN      | 1 | 15.7 | 10.3 | 5.4  | 5.0   |
| CENPK    | 7 | 52.5 | 8.8  | 43.7 | -34.9 |
| OPTN     | 3 | 16.0 | 7.3  | 8.7  | -1.3  |
| ATF1     | 1 | 50.5 | 46.4 | 4.1  | 42.4  |
| TSFM     | 0 | 15.7 | 5.7  | 9.9  | -4.2  |
| PFDN5    | 0 | 12.7 | 5.3  | 7.4  | -2.1  |
| SPATS2   | 1 | 17.4 | 14.4 | 3.0  | 11.4  |
| ORMDL2   | 0 | 7.7  | 3.0  | 4.8  | -1.8  |
| NR4A1    | 0 | 10.6 | 3.9  | 6.7  | -2.8  |
| CDK2     | 5 | 15.5 | 5.3  | 10.2 | -4.8  |
| LRP1     | 0 | 10.4 | 5.3  | 5.1  | 0.3   |
| ATG101   | 2 | 12.0 | 4.2  | 7.8  | -3.5  |
| SMUG1    | 2 | 16.8 | 6.0  | 10.8 | -4.8  |
| TUBA1B   | 5 | 26.1 | 15.8 | 10.3 | 5.4   |
| KBTBD4   | 2 | 19.4 | 7.3  | 12.1 | -4.8  |
| ATPAF1   | 0 | 9.0  | 3.2  | 5.8  | -2.7  |
| STIL     | 7 | 26.2 | 5.4  | 20.8 | -15.4 |
| HJURP    | 5 | 18.6 | 6.0  | 12.6 | -6.5  |
| AMD1     | 1 | 59.5 | 51.2 | 8.4  | 42.8  |
| NDUFAF4  | 6 | 31.3 | 4.6  | 26.7 | -22.1 |
| MORF4L2  | 1 | 41.7 | 38.7 | 3.0  | 35.7  |
| FAM199X  | 1 | 13.3 | 9.9  | 3.4  | 6.5   |
| RAB9A    | 1 | 9.2  | 4.5  | 4.7  | -0.2  |
| METTL8   | 1 | 16.9 | 10.8 | 6.0  | 4.8   |
| TTC21B   | 1 | 24.4 | 18.6 | 5.7  | 12.9  |
| NMI      | 0 | 8.4  | 2.6  | 5.7  | -3.1  |
| BAZ2B    | 1 | 21.1 | 18.1 | 3.0  | 15.2  |
| SLC36A1  | 2 | 12.1 | 3.8  | 8.3  | -4.6  |

|           |    |      |      |      |       |
|-----------|----|------|------|------|-------|
| LPGAT1    | 1  | 11.1 | 6.4  | 4.7  | 1.7   |
| GOS2      | 3  | 7.7  | 2.4  | 5.2  | -2.8  |
| RAP2C     | 1  | 8.0  | 4.7  | 3.3  | 1.4   |
| EXOSC9    | 1  | 41.1 | 33.1 | 8.0  | 25.1  |
| PLA2G12A  | 6  | 11.6 | 2.3  | 9.3  | -7.0  |
| B9D2      | 10 | 17.8 | 1.3  | 16.5 | -15.2 |
| ADCK4     | 0  | 13.3 | 5.7  | 7.6  | -1.9  |
| PFKFB2    | 0  | 7.4  | 2.8  | 4.7  | -1.9  |
| C4BPB     | 0  | 8.2  | 2.9  | 5.3  | -2.5  |
| AGO2      | 0  | 9.8  | 2.9  | 6.8  | -3.9  |
| MXD4      | 8  | 11.1 | 1.7  | 9.4  | -7.7  |
| CKS2      | 5  | 28.6 | 17.8 | 10.8 | 6.9   |
| ACSL3     | 1  | 77.1 | 71.3 | 5.8  | 65.6  |
| CHPF      | 0  | 13.4 | 6.6  | 6.9  | -0.3  |
| DNPEP     | 6  | 10.2 | 2.1  | 8.0  | -5.9  |
| OBSL1     | 0  | 8.3  | 4.6  | 3.7  | 0.9   |
| SLC12A4   | 0  | 12.2 | 6.2  | 6.0  | 0.1   |
| ENKD1     | 2  | 17.4 | 5.8  | 11.6 | -5.7  |
| FAM210B   | 0  | 8.1  | 3.7  | 4.4  | -0.7  |
| SNX21     | 2  | 25.1 | 8.3  | 16.8 | -8.5  |
| SLPI      | 4  | 9.5  | 3.1  | 6.5  | -3.4  |
| TTPAL     | 0  | 9.2  | 4.7  | 4.5  | 0.2   |
| SDC4      | 0  | 8.1  | 3.2  | 4.9  | -1.6  |
| NCOA3     | 1  | 14.2 | 10.9 | 3.3  | 7.6   |
| PIGT      | 0  | 13.6 | 6.1  | 7.5  | -1.4  |
| NCOA5     | 0  | 15.1 | 6.6  | 8.5  | -1.9  |
| VAPB      | 1  | 9.3  | 4.4  | 4.9  | -0.5  |
| ATP5E     | 6  | 42.1 | 17.9 | 24.2 | -6.3  |
| CHD6      | 1  | 21.2 | 16.4 | 4.8  | 11.5  |
| PLCG1     | 1  | 17.6 | 9.6  | 8.0  | 1.6   |
| SRSF6     | 1  | 20.5 | 15.4 | 5.1  | 10.4  |
| ARFGEF2   | 1  | 29.9 | 26.0 | 3.9  | 22.1  |
| ZNFX1     | 3  | 11.2 | 4.4  | 6.8  | -2.4  |
| CSE1L     | 1  | 95.7 | 79.7 | 16.0 | 63.6  |
| TMEM189-U | 0  | 7.0  | 3.3  | 3.7  | -0.4  |
| RAB22A    | 0  | 7.2  | 2.7  | 4.5  | -1.7  |
| STAU1     | 1  | 9.5  | 5.4  | 4.2  | 1.2   |
| STX16     | 1  | 27.3 | 24.3 | 3.0  | 21.3  |
| PMEPA1    | 3  | 19.3 | 10.5 | 8.8  | 1.7   |
| RNF114    | 0  | 6.7  | 3.0  | 3.7  | -0.7  |
| DDX27     | 1  | 20.5 | 11.3 | 9.3  | 2.0   |
| BCAS4     | 0  | 8.0  | 3.5  | 4.6  | -1.1  |
| MTRR      | 1  | 27.3 | 22.8 | 4.6  | 18.2  |
| FASTKD3   | 1  | 11.6 | 5.6  | 6.0  | -0.3  |
| PEPD      | 4  | 11.7 | 4.2  | 7.5  | -3.2  |
| IQSEC2    | 3  | 10.6 | 3.4  | 7.2  | -3.8  |
| VAMP7     | 1  | 33.9 | 28.8 | 5.0  | 23.8  |
| STAMPB    | 0  | 6.7  | 2.1  | 4.6  | -2.5  |
| NAGK      | 3  | 10.4 | 3.8  | 6.6  | -2.8  |
| MCEE      | 0  | 10.7 | 3.8  | 6.9  | -3.1  |
| SNRNP27   | 0  | 6.9  | 2.3  | 4.6  | -2.4  |
| MPHOSPH1C | 1  | 46.0 | 40.7 | 5.3  | 35.3  |
| USP22     | 0  | 9.1  | 4.4  | 4.7  | -0.3  |
| ZNF576    | 2  | 20.2 | 8.6  | 11.7 | -3.1  |

|          |    |      |      |      |       |
|----------|----|------|------|------|-------|
| ZNF45    | 1  | 9.0  | 5.4  | 3.5  | 1.9   |
| USP9X    | 1  | 45.8 | 41.4 | 4.4  | 37.1  |
| BTN2A2   | 0  | 9.9  | 4.4  | 5.5  | -1.2  |
| SIRT5    | 2  | 18.8 | 7.9  | 10.9 | -3.0  |
| MRS2     | 0  | 7.2  | 2.9  | 4.3  | -1.4  |
| WRNIP1   | 2  | 10.7 | 3.5  | 7.2  | -3.7  |
| RRP36    | 0  | 10.8 | 4.8  | 6.0  | -1.2  |
| SNRPC    | 5  | 17.2 | 5.8  | 11.4 | -5.5  |
| SERPINB6 | 3  | 14.6 | 5.1  | 9.5  | -4.4  |
| XPO5     | 6  | 32.7 | 7.4  | 25.3 | -18.0 |
| ABCC10   | 0  | 10.5 | 4.8  | 5.7  | -0.9  |
| PEX6     | 2  | 16.0 | 5.7  | 10.3 | -4.6  |
| NQO2     | 0  | 8.0  | 3.9  | 4.1  | -0.2  |
| OARD1    | 1  | 9.0  | 5.4  | 3.6  | 1.8   |
| AARS2    | 2  | 32.4 | 15.7 | 16.7 | -1.0  |
| RPS10    | 10 | 26.5 | 2.3  | 24.2 | -21.9 |
| MED20    | 0  | 12.2 | 5.7  | 6.6  | -0.9  |
| TBCC     | 2  | 23.3 | 9.6  | 13.7 | -4.0  |
| MAD2L1BP | 2  | 17.6 | 6.4  | 11.3 | -4.9  |
| KLHDC3   | 11 | 19.6 | 1.8  | 17.8 | -16.0 |
| MEA1     | 0  | 15.1 | 6.3  | 8.8  | -2.5  |
| CDKN1A   | 0  | 11.8 | 4.4  | 7.5  | -3.1  |
| SOX4     | 0  | 10.3 | 4.9  | 5.4  | -0.4  |
| GLO1     | 1  | 34.3 | 25.4 | 8.9  | 16.4  |
| RREB1    | 4  | 17.1 | 6.2  | 10.9 | -4.7  |
| SSR1     | 1  | 48.1 | 45.2 | 3.0  | 42.2  |
| RIOK1    | 1  | 22.4 | 15.5 | 6.9  | 8.6   |
| SLC35B3  | 1  | 12.7 | 9.5  | 3.2  | 6.2   |
| RPP40    | 0  | 11.4 | 4.3  | 7.2  | -2.9  |
| ATXN1    | 0  | 7.1  | 2.6  | 4.5  | -1.9  |
| NUP153   | 1  | 28.5 | 20.5 | 8.0  | 12.5  |
| DEK      | 1  | 86.8 | 77.5 | 9.3  | 68.2  |
| EEF1E1   | 1  | 41.7 | 32.0 | 9.7  | 22.4  |
| LRRFIP1  | 1  | 27.9 | 22.1 | 5.7  | 16.4  |
| MYRF     | 4  | 14.5 | 3.9  | 10.6 | -6.7  |
| AHNAK    | 3  | 15.3 | 9.3  | 6.1  | 3.2   |
| EMC3     | 0  | 11.1 | 5.8  | 5.3  | 0.5   |
| SH3TC1   | 0  | 12.8 | 4.7  | 8.1  | -3.4  |
| CNOT1    | 1  | 56.1 | 45.9 | 10.2 | 35.7  |
| BBS2     | 6  | 24.6 | 5.6  | 19.0 | -13.4 |
| MT2A     | 3  | 15.0 | 8.4  | 6.6  | 1.8   |
| C16orf70 | 0  | 12.9 | 6.7  | 6.2  | 0.5   |
| GOT2     | 2  | 16.3 | 5.6  | 10.7 | -5.2  |
| DOK4     | 4  | 23.0 | 10.3 | 12.8 | -2.5  |
| TMTC4    | 0  | 6.8  | 3.6  | 3.3  | 0.3   |
| RAP2A    | 1  | 16.0 | 12.6 | 3.3  | 9.3   |
| ABCC4    | 0  | 6.5  | 1.8  | 4.7  | -2.9  |
| TM9SF2   | 1  | 11.0 | 6.5  | 4.5  | 1.9   |
| C17orf53 | 2  | 29.8 | 13.0 | 16.7 | -3.7  |
| IRF1     | 3  | 24.5 | 12.7 | 11.8 | 1.0   |
| UPF3B    | 1  | 21.0 | 15.4 | 5.5  | 9.9   |
| RNF113A  | 2  | 17.7 | 6.8  | 10.9 | -4.1  |
| 6-Sep    | 0  | 6.5  | 3.4  | 3.1  | 0.3   |
| NDUFA1   | 0  | 10.7 | 5.6  | 5.1  | 0.4   |



|          |    |      |      |      |       |
|----------|----|------|------|------|-------|
| ATP5S    | 0  | 8.5  | 2.7  | 5.9  | -3.2  |
| BMP4     | 0  | 5.9  | 2.8  | 3.1  | -0.3  |
| FAM193A  | 8  | 16.1 | 2.8  | 13.3 | -10.4 |
| SOX9     | 0  | 9.5  | 4.2  | 5.3  | -1.0  |
| MRPS7    | 5  | 17.8 | 3.7  | 14.1 | -10.4 |
| GGA3     | 0  | 6.8  | 3.4  | 3.4  | 0.0   |
| ARMC7    | 2  | 26.4 | 9.6  | 16.8 | -7.1  |
| NUP85    | 5  | 16.4 | 6.1  | 10.3 | -4.2  |
| SLC25A19 | 2  | 24.6 | 9.3  | 15.3 | -6.0  |
| MIF4GD   | 2  | 13.5 | 4.6  | 9.0  | -4.4  |
| NT5C     | 0  | 7.2  | 3.1  | 4.2  | -1.1  |
| MSTO1    | 9  | 15.8 | 2.4  | 13.4 | -11.0 |
| TTF1     | 1  | 14.1 | 9.4  | 4.7  | 4.8   |
| GTF3C4   | 10 | 10.1 | 1.6  | 8.6  | -7.0  |
| DDX31    | 10 | 19.0 | 4.1  | 14.9 | -10.8 |
| PPP1R12C | 0  | 13.1 | 5.8  | 7.2  | -1.4  |
| MBOAT7   | 3  | 17.7 | 9.1  | 8.6  | 0.5   |
| SLC2A4RG | 5  | 8.4  | 2.2  | 6.2  | -4.0  |
| PPDPF    | 0  | 5.7  | 2.9  | 2.8  | 0.1   |
| CHCHD5   | 2  | 12.6 | 4.6  | 7.9  | -3.3  |
| INSIG2   | 1  | 9.1  | 5.8  | 3.3  | 2.4   |
| POLR1B   | 1  | 14.5 | 7.2  | 7.3  | -0.1  |
| CCDC93   | 1  | 15.9 | 12.2 | 3.7  | 8.5   |
| SLC25A23 | 8  | 14.7 | 2.9  | 11.8 | -8.8  |
| GTF2F1   | 8  | 12.7 | 4.5  | 8.2  | -3.7  |
| ALKBH7   | 2  | 17.9 | 6.0  | 11.9 | -5.8  |
| CLPP     | 8  | 24.8 | 9.3  | 15.5 | -6.2  |
| THOC2    | 1  | 78.6 | 74.5 | 4.1  | 70.4  |
| MED1     | 1  | 32.8 | 28.7 | 4.1  | 24.6  |
| RPL23    | 1  | 24.8 | 20.1 | 4.7  | 15.4  |
| ATG4C    | 1  | 39.5 | 30.8 | 8.7  | 22.1  |
| C3       | 0  | 9.6  | 4.0  | 5.6  | -1.7  |
| TRIP10   | 0  | 6.4  | 2.3  | 4.1  | -1.8  |
| GPR108   | 0  | 9.7  | 4.2  | 5.5  | -1.3  |
| OPA3     | 2  | 17.1 | 5.9  | 11.2 | -5.2  |
| SNRPD2   | 5  | 11.4 | 2.3  | 9.1  | -6.8  |
| RTN2     | 0  | 6.2  | 2.5  | 3.6  | -1.1  |
| EML2     | 0  | 6.0  | 2.7  | 3.3  | -0.5  |
| VASP     | 0  | 7.6  | 2.4  | 5.3  | -2.9  |
| SYMPK    | 0  | 7.3  | 3.5  | 3.8  | -0.3  |
| GPCPD1   | 1  | 13.2 | 9.2  | 4.0  | 5.3   |
| PANK2    | 7  | 14.1 | 1.4  | 12.7 | -11.2 |
| FOXA2    | 4  | 23.0 | 4.8  | 18.2 | -13.4 |
| GZF1     | 1  | 14.1 | 9.3  | 4.8  | 4.6   |
| CENPB    | 0  | 24.3 | 7.4  | 16.9 | -9.5  |
| PSMF1    | 0  | 6.2  | 2.6  | 3.6  | -0.9  |
| DTD1     | 0  | 6.5  | 2.8  | 3.7  | -0.9  |
| RBCK1    | 3  | 9.7  | 3.4  | 6.3  | -3.0  |
| TMX4     | 0  | 8.8  | 4.7  | 4.1  | 0.5   |
| STK35    | 2  | 23.8 | 9.4  | 14.4 | -5.0  |
| SNRPB    | 5  | 22.3 | 8.7  | 13.6 | -4.9  |
| NRSN2    | 0  | 6.0  | 2.8  | 3.1  | -0.3  |
| AP5S1    | 2  | 18.7 | 6.8  | 11.9 | -5.2  |
| RRBP1    | 0  | 8.5  | 4.2  | 4.2  | 0.0   |

|           |    |       |       |      |       |
|-----------|----|-------|-------|------|-------|
| ZNF133    | 0  | 13.9  | 7.2   | 6.7  | 0.5   |
| FLRT3     | 0  | 7.7   | 2.5   | 5.2  | -2.7  |
| MKKS      | 6  | 19.4  | 6.1   | 13.4 | -7.3  |
| DSTN      | 3  | 15.7  | 6.1   | 9.6  | -3.5  |
| SNRPB2    | 1  | 50.0  | 44.8  | 5.1  | 39.7  |
| MGME1     | 7  | 29.3  | 4.0   | 25.3 | -21.2 |
| TBC1D20   | 0  | 8.9   | 4.5   | 4.4  | 0.2   |
| ITPA      | 0  | 9.8   | 3.7   | 6.1  | -2.3  |
| MCM8      | 7  | 42.2  | 6.6   | 35.5 | -28.9 |
| FAM110A   | 2  | 42.8  | 21.8  | 21.1 | 0.7   |
| MRPS26    | 2  | 21.9  | 6.3   | 15.6 | -9.3  |
| NCLN      | 8  | 30.2  | 7.7   | 22.4 | -14.7 |
| HNRNPR    | 1  | 114.9 | 107.4 | 7.5  | 99.9  |
| MAX       | 0  | 9.8   | 4.0   | 5.8  | -1.8  |
| ARMCX5    | 0  | 7.0   | 2.5   | 4.5  | -2.1  |
| MMP24     | 3  | 14.4  | 6.1   | 8.2  | -2.1  |
| NECAB3    | 0  | 13.4  | 5.0   | 8.4  | -3.3  |
| ID1       | 4  | 14.1  | 3.9   | 10.2 | -6.3  |
| RALY      | 0  | 14.3  | 5.8   | 8.5  | -2.6  |
| DYNLRB1   | 0  | 13.8  | 5.9   | 7.9  | -2.1  |
| EIF2S2    | 1  | 81.2  | 74.3  | 6.9  | 67.5  |
| ERGIC3    | 0  | 11.2  | 5.8   | 5.4  | 0.5   |
| ROMO1     | 0  | 11.5  | 4.5   | 7.0  | -2.4  |
| CEP250    | 7  | 16.1  | 1.3   | 14.9 | -13.6 |
| PLAGL2    | 0  | 18.2  | 8.4   | 9.7  | -1.3  |
| MMP24-AS1 | 0  | 10.4  | 4.3   | 6.1  | -1.8  |
| KDM5C     | 0  | 12.2  | 5.7   | 6.5  | -0.9  |
| TMEM115   | 2  | 25.8  | 10.0  | 15.8 | -5.8  |
| PSMB2     | 0  | 11.6  | 5.0   | 6.6  | -1.6  |
| AGO3      | 0  | 10.7  | 4.9   | 5.8  | -1.0  |
| UROD      | 2  | 16.2  | 6.1   | 10.2 | -4.1  |
| ST3GAL3   | 10 | 28.7  | 1.4   | 27.3 | -25.9 |
| TMEM53    | 4  | 15.9  | 4.3   | 11.6 | -7.3  |
| HECTD3    | 2  | 16.3  | 4.9   | 11.4 | -6.5  |
| KLC1      | 0  | 10.0  | 4.9   | 5.1  | -0.1  |
| XRCC3     | 0  | 12.8  | 4.7   | 8.1  | -3.3  |
| TUBGCP3   | 0  | 8.6   | 4.0   | 4.6  | -0.6  |
| PCID2     | 0  | 8.2   | 2.9   | 5.3  | -2.4  |
| LRFN3     | 0  | 13.6  | 5.6   | 8.0  | -2.4  |
| IGFLR1    | 0  | 10.0  | 3.5   | 6.5  | -3.0  |
| CAPNS1    | 3  | 9.9   | 3.3   | 6.6  | -3.3  |
| PDCD2L    | 0  | 15.7  | 5.8   | 9.9  | -4.2  |
| RBM42     | 2  | 17.4  | 5.8   | 11.7 | -5.9  |
| UBA2      | 1  | 112.0 | 105.0 | 6.9  | 98.1  |
| COX6B1    | 0  | 10.3  | 4.0   | 6.3  | -2.3  |
| THRA      | 0  | 10.5  | 4.5   | 6.0  | -1.4  |
| NR1D1     | 2  | 14.3  | 4.7   | 9.6  | -4.9  |
| FRMD8     | 2  | 23.0  | 8.8   | 14.2 | -5.4  |
| PRDX5     | 2  | 13.3  | 4.8   | 8.4  | -3.6  |
| BCL2L12   | 5  | 16.0  | 2.9   | 13.1 | -10.3 |
| IRF3      | 0  | 7.7   | 4.2   | 3.5  | 0.7   |
| PRMT1     | 0  | 12.4  | 6.0   | 6.3  | -0.3  |
| RRAS      | 3  | 25.2  | 16.4  | 8.8  | 7.6   |
| SCAF1     | 0  | 24.4  | 10.0  | 14.3 | -4.3  |

|         |    |      |      |      |       |
|---------|----|------|------|------|-------|
| PRR12   | 2  | 29.8 | 10.7 | 19.1 | -8.4  |
| ASL     | 4  | 18.0 | 9.4  | 8.6  | 0.9   |
| SBDS    | 1  | 19.9 | 15.7 | 4.3  | 11.4  |
| BECN1   | 1  | 9.0  | 5.3  | 3.7  | 1.5   |
| TRAP1   | 0  | 17.4 | 6.0  | 11.3 | -5.3  |
| GLIS2   | 0  | 8.8  | 3.9  | 4.9  | -1.0  |
| NSRP1   | 1  | 22.3 | 20.0 | 2.3  | 17.8  |
| DNAJC8  | 0  | 6.9  | 3.0  | 4.0  | -1.0  |
| IFI6    | 0  | 12.4 | 5.8  | 6.6  | -0.8  |
| ZNF384  | 0  | 11.2 | 5.9  | 5.4  | 0.5   |
| EMG1    | 6  | 24.3 | 9.5  | 14.8 | -5.3  |
| UXT     | 0  | 10.4 | 5.1  | 5.3  | -0.2  |
| ELK1    | 0  | 14.0 | 6.1  | 7.9  | -1.9  |
| TIMM17B | 0  | 11.7 | 4.7  | 7.0  | -2.3  |
| PCNXL4  | 1  | 30.3 | 24.9 | 5.4  | 19.4  |
| KTN1    | 1  | 73.6 | 66.8 | 6.9  | 59.9  |
| DLGAP5  | 7  | 49.8 | 11.2 | 38.7 | -27.5 |
| L3HYPDH | 1  | 10.3 | 5.8  | 4.4  | 1.4   |
| HSPA2   | 0  | 6.6  | 3.1  | 3.4  | -0.3  |
| ZBTB1   | 1  | 39.1 | 35.8 | 3.3  | 32.5  |
| TRMT5   | 1  | 18.7 | 12.5 | 6.2  | 6.3   |
| SGPP1   | 1  | 11.6 | 8.5  | 3.1  | 5.5   |
| PLEKHG3 | 0  | 11.4 | 4.1  | 7.3  | -3.2  |
| RHOT1   | 1  | 30.0 | 26.1 | 3.9  | 22.2  |
| WDR60   | 1  | 9.8  | 6.9  | 2.9  | 4.0   |
| NUP214  | 0  | 6.3  | 2.0  | 4.3  | -2.4  |
| SLC10A3 | 0  | 19.7 | 8.5  | 11.3 | -2.8  |
| MAP2K2  | 8  | 8.9  | 2.0  | 7.0  | -5.0  |
| HNRNPH2 | 1  | 37.1 | 33.9 | 3.2  | 30.7  |
| TIMM8A  | 0  | 11.9 | 4.8  | 7.0  | -2.2  |
| ZC4H2   | 0  | 7.1  | 3.3  | 3.9  | -0.6  |
| CANX    | 1  | 84.0 | 78.6 | 5.4  | 73.2  |
| CPSF3L  | 0  | 7.9  | 2.8  | 5.1  | -2.3  |
| IPPK    | 10 | 10.9 | 2.2  | 8.7  | -6.5  |
| PPCS    | 0  | 8.5  | 3.6  | 5.0  | -1.4  |
| COX7C   | 6  | 25.1 | 6.0  | 19.0 | -13.0 |
| TRAF2   | 10 | 11.6 | 2.0  | 9.5  | -7.5  |
| ABHD8   | 8  | 27.4 | 5.0  | 22.4 | -17.4 |
| RAP1B   | 1  | 28.5 | 24.9 | 3.5  | 21.4  |
| TSPAN8  | 4  | 17.5 | 8.6  | 8.8  | -0.2  |
| RAB3IP  | 1  | 20.9 | 13.4 | 7.5  | 6.0   |
| DYRK2   | 0  | 6.9  | 3.2  | 3.7  | -0.6  |
| YEATS4  | 7  | 12.1 | 0.8  | 11.3 | -10.5 |
| LRRC61  | 4  | 12.0 | 3.8  | 8.2  | -4.4  |
| IDUA    | 0  | 12.7 | 5.1  | 7.6  | -2.4  |
| FGFRL1  | 8  | 17.2 | 2.9  | 14.3 | -11.3 |
| TMEM175 | 0  | 7.1  | 3.4  | 3.6  | -0.2  |
| AUNIP   | 0  | 20.3 | 8.2  | 12.1 | -3.9  |
| PIN1    | 8  | 23.9 | 8.7  | 15.2 | -6.5  |
| FBXL12  | 8  | 19.8 | 3.3  | 16.4 | -13.1 |
| EMC1    | 0  | 6.2  | 3.1  | 3.1  | 0.0   |
| UBR4    | 0  | 6.3  | 1.9  | 4.5  | -2.6  |
| HP1BP3  | 1  | 25.7 | 19.1 | 6.7  | 12.4  |
| SIN3B   | 8  | 14.2 | 2.1  | 12.1 | -10.0 |

|          |    |      |      |      |       |
|----------|----|------|------|------|-------|
| SLC35E1  | 0  | 12.7 | 5.2  | 7.5  | -2.2  |
| EPS15L1  | 8  | 15.2 | 2.4  | 12.8 | -10.4 |
| UQCR11   | 6  | 11.1 | 3.2  | 7.9  | -4.6  |
| GFER     | 12 | 21.5 | 4.5  | 17.0 | -12.4 |
| PKMYT1   | 5  | 14.4 | 6.5  | 7.9  | -1.4  |
| WDR24    | 12 | 20.0 | 2.2  | 17.8 | -15.5 |
| CHTF18   | 12 | 11.1 | 1.5  | 9.6  | -8.1  |
| MACF1    | 3  | 23.0 | 8.8  | 14.2 | -5.5  |
| SMARCA4  | 0  | 7.0  | 2.6  | 4.4  | -1.7  |
| KDM4B    | 8  | 24.8 | 4.5  | 20.4 | -15.9 |
| TICAM1   | 8  | 31.7 | 5.9  | 25.8 | -19.9 |
| EMC6     | 10 | 17.5 | 2.3  | 15.2 | -12.9 |
| METTL16  | 0  | 14.2 | 5.9  | 8.2  | -2.3  |
| TUBA4A   | 0  | 11.5 | 5.0  | 6.5  | -1.5  |
| VIL1     | 4  | 24.9 | 15.6 | 9.4  | 6.2   |
| AAMP     | 0  | 11.8 | 5.0  | 6.8  | -1.7  |
| PNKD     | 2  | 18.7 | 6.2  | 12.5 | -6.3  |
| RNF6     | 1  | 44.1 | 39.9 | 4.2  | 35.7  |
| ECHS1    | 2  | 20.1 | 6.9  | 13.2 | -6.3  |
| AKAP9    | 1  | 24.1 | 19.0 | 5.2  | 13.8  |
| SHFM1    | 6  | 30.0 | 12.2 | 17.8 | -5.6  |
| HIP1     | 3  | 15.8 | 5.1  | 10.7 | -5.6  |
| PTPN12   | 1  | 46.5 | 43.2 | 3.4  | 39.8  |
| POR      | 4  | 19.9 | 9.1  | 10.8 | -1.7  |
| STYXL1   | 0  | 8.4  | 3.5  | 4.9  | -1.4  |
| GNAI1    | 1  | 8.0  | 4.6  | 3.4  | 1.3   |
| PEX1     | 1  | 12.7 | 8.9  | 3.8  | 5.1   |
| MTERF1   | 1  | 29.4 | 24.5 | 5.0  | 19.5  |
| SGCE     | 1  | 21.3 | 16.2 | 5.1  | 11.2  |
| RBM48    | 0  | 6.7  | 2.8  | 3.9  | -1.1  |
| CASD1    | 1  | 19.2 | 15.3 | 3.9  | 11.4  |
| ZFP36    | 4  | 13.1 | 4.4  | 8.7  | -4.3  |
| SRD5A3   | 0  | 6.8  | 2.8  | 4.0  | -1.1  |
| PAICS    | 5  | 22.4 | 5.8  | 16.6 | -10.7 |
| PPAT     | 1  | 39.9 | 31.0 | 8.9  | 22.2  |
| TUBGCP6  | 2  | 19.7 | 6.2  | 13.6 | -7.4  |
| DGCR6L   | 2  | 26.0 | 8.7  | 17.3 | -8.6  |
| DGCR8    | 0  | 10.6 | 4.9  | 5.7  | -0.7  |
| SDF2L1   | 2  | 17.5 | 6.8  | 10.7 | -3.9  |
| YWHAH    | 5  | 14.1 | 3.9  | 10.1 | -6.2  |
| ATF4     | 0  | 9.3  | 4.4  | 4.9  | -0.5  |
| CDC42EP1 | 0  | 12.2 | 4.2  | 8.0  | -3.7  |
| TPST2    | 3  | 13.1 | 4.1  | 9.0  | -4.8  |
| MPST     | 4  | 26.7 | 7.3  | 19.4 | -12.1 |
| TST      | 4  | 25.9 | 10.8 | 15.2 | -4.4  |
| APOL2    | 3  | 15.0 | 8.5  | 6.5  | 2.1   |
| RAC2     | 3  | 19.0 | 11.7 | 7.3  | 4.4   |
| LIF      | 3  | 19.1 | 12.4 | 6.6  | 5.8   |
| EMC4     | 0  | 7.0  | 2.9  | 4.1  | -1.2  |
| SPECC1   | 0  | 5.1  | 2.2  | 2.9  | -0.6  |
| CPA4     | 3  | 18.6 | 10.7 | 7.9  | 2.9   |
| DOCK4    | 1  | 11.3 | 7.7  | 3.6  | 4.0   |
| POT1     | 1  | 49.9 | 43.0 | 6.9  | 36.1  |
| ATP6V1F  | 0  | 9.5  | 4.3  | 5.2  | -0.9  |

|          |   |       |      |      |       |
|----------|---|-------|------|------|-------|
| LSM8     | 1 | 79.1  | 68.9 | 10.2 | 58.7  |
| PRKRIP1  | 2 | 19.5  | 7.8  | 11.7 | -3.9  |
| PODXL    | 3 | 8.7   | 3.9  | 4.7  | -0.8  |
| STRIP2   | 0 | 7.1   | 2.8  | 4.3  | -1.6  |
| IFT22    | 0 | 14.4  | 5.8  | 8.6  | -2.9  |
| MKLN1    | 1 | 37.0  | 32.7 | 4.2  | 28.5  |
| DNAJB9   | 1 | 13.4  | 8.7  | 4.7  | 4.0   |
| FLNC     | 3 | 6.5   | 2.4  | 4.1  | -1.8  |
| CALU     | 1 | 53.1  | 48.6 | 4.5  | 44.1  |
| SMO      | 0 | 7.5   | 3.4  | 4.1  | -0.6  |
| KLHDC10  | 0 | 7.1   | 2.2  | 4.9  | -2.8  |
| NDUFA5   | 1 | 102.2 | 95.5 | 6.7  | 88.8  |
| MRPS12   | 2 | 18.2  | 5.8  | 12.4 | -6.7  |
| MYO1B    | 1 | 18.0  | 15.0 | 2.9  | 12.1  |
| MTX2     | 1 | 29.8  | 23.4 | 6.4  | 17.0  |
| CHN1     | 1 | 13.2  | 8.0  | 5.2  | 2.8   |
| OSGEPL1  | 1 | 12.3  | 7.0  | 5.3  | 1.7   |
| ORMDL1   | 1 | 56.9  | 53.3 | 3.6  | 49.7  |
| HAT1     | 1 | 68.2  | 57.2 | 11.0 | 46.2  |
| HERC2    | 6 | 18.9  | 3.2  | 15.7 | -12.5 |
| SNRPN    | 0 | 5.4   | 1.7  | 3.7  | -2.0  |
| PSMG2    | 1 | 8.9   | 4.6  | 4.3  | 0.3   |
| TWSG1    | 1 | 17.5  | 11.7 | 5.7  | 6.0   |
| EIF2AK4  | 1 | 9.3   | 5.8  | 3.5  | 2.3   |
| C15orf57 | 0 | 5.9   | 2.5  | 3.4  | -1.0  |
| INO80    | 1 | 16.9  | 11.6 | 5.3  | 6.2   |
| ICE2     | 1 | 56.6  | 48.8 | 7.8  | 41.0  |
| IVD      | 0 | 6.9   | 2.6  | 4.3  | -1.6  |
| KNSTRN   | 7 | 39.4  | 7.5  | 31.9 | -24.3 |
| DUT      | 1 | 8.9   | 5.2  | 3.7  | 1.5   |
| CHAC1    | 0 | 6.6   | 3.4  | 3.2  | 0.2   |
| CLN6     | 4 | 21.8  | 4.6  | 17.2 | -12.6 |
| ARPP19   | 1 | 75.2  | 68.0 | 7.2  | 60.8  |
| VPS13C   | 1 | 20.7  | 17.7 | 3.0  | 14.7  |
| CALML4   | 4 | 17.8  | 8.5  | 9.3  | -0.8  |
| LOXL1    | 3 | 9.4   | 3.6  | 5.8  | -2.1  |
| ANAPC13  | 1 | 43.5  | 39.5 | 4.1  | 35.4  |
| MBD4     | 1 | 26.3  | 22.7 | 3.6  | 19.1  |
| COPB1    | 1 | 86.0  | 81.3 | 4.7  | 76.6  |
| PSMA1    | 1 | 52.8  | 46.9 | 6.0  | 40.9  |
| SUMF2    | 0 | 7.9   | 3.9  | 4.0  | -0.2  |
| PALLD    | 1 | 16.3  | 8.3  | 8.0  | 0.3   |
| SPCS3    | 1 | 21.2  | 17.5 | 3.7  | 13.8  |
| SERGEF   | 0 | 6.8   | 2.9  | 3.9  | -1.1  |
| E2F8     | 5 | 8.8   | 1.8  | 7.0  | -5.2  |
| DCTD     | 0 | 5.6   | 2.3  | 3.3  | -1.0  |
| FAM64A   | 0 | 6.1   | 2.3  | 3.8  | -1.5  |
| RPAIN    | 1 | 14.4  | 7.8  | 6.6  | 1.1   |
| PLD2     | 0 | 10.4  | 4.8  | 5.6  | -0.8  |
| CD68     | 0 | 12.5  | 5.6  | 6.9  | -1.3  |
| TXNDC17  | 0 | 8.4   | 2.9  | 5.4  | -2.5  |
| FXR2     | 0 | 12.3  | 5.9  | 6.4  | -0.4  |
| KIF1C    | 0 | 8.9   | 4.3  | 4.6  | -0.2  |
| MPDU1    | 0 | 15.4  | 5.5  | 9.9  | -4.4  |

|          |    |      |      |      |       |
|----------|----|------|------|------|-------|
| PHF20L1  | 1  | 28.9 | 26.1 | 2.8  | 23.2  |
| CCNT1    | 1  | 25.6 | 20.7 | 5.0  | 15.7  |
| KRI1     | 8  | 8.7  | 2.1  | 6.6  | -4.5  |
| ILF3     | 8  | 14.4 | 3.7  | 10.8 | -7.1  |
| SLC44A2  | 0  | 7.0  | 2.8  | 4.1  | -1.3  |
| AP1M2    | 1  | 11.0 | 5.1  | 5.9  | -0.8  |
| CDKN2D   | 8  | 16.9 | 2.1  | 14.9 | -12.8 |
| MTUS1    | 0  | 10.5 | 2.4  | 8.1  | -5.7  |
| NGDN     | 1  | 19.5 | 11.3 | 8.2  | 3.1   |
| RAB2B    | 0  | 7.0  | 3.3  | 3.6  | -0.3  |
| BCL2L2   | 0  | 6.7  | 2.8  | 3.9  | -1.1  |
| AJUBA    | 5  | 9.1  | 1.8  | 7.3  | -5.6  |
| DTD2     | 0  | 8.8  | 3.4  | 5.4  | -2.0  |
| PARP2    | 7  | 18.9 | 3.6  | 15.2 | -11.6 |
| HEATR5A  | 1  | 14.4 | 8.8  | 5.7  | 3.1   |
| FOXA1    | 4  | 28.2 | 17.7 | 10.5 | 7.2   |
| SNX6     | 1  | 45.4 | 41.1 | 4.4  | 36.7  |
| EAPP     | 1  | 8.4  | 4.6  | 3.8  | 0.8   |
| MIS18BP1 | 1  | 56.9 | 46.0 | 10.9 | 35.2  |
| NEDD8    | 0  | 6.8  | 2.8  | 4.0  | -1.2  |
| DAD1     | 0  | 6.2  | 2.7  | 3.5  | -0.8  |
| TEP1     | 0  | 5.0  | 2.3  | 2.7  | -0.5  |
| REEP5    | 6  | 11.2 | 3.5  | 7.7  | -4.2  |
| ITFG1    | 1  | 11.7 | 7.7  | 4.0  | 3.7   |
| SEC14L1  | 3  | 10.2 | 2.8  | 7.5  | -4.7  |
| RHBDF2   | 0  | 11.9 | 4.9  | 7.0  | -2.0  |
| MAP7D3   | 1  | 15.4 | 6.5  | 8.9  | -2.4  |
| ASH2L    | 6  | 8.2  | 1.0  | 7.2  | -6.2  |
| TTI2     | 2  | 20.8 | 8.9  | 11.9 | -3.1  |
| SGOL1    | 5  | 15.1 | 2.3  | 12.7 | -10.4 |
| RPS4Y1   | 0  | 4.4  | 1.8  | 2.6  | -0.8  |
| KLF16    | 8  | 46.4 | 7.2  | 39.2 | -32.0 |
| TMEM8A   | 12 | 11.8 | 1.4  | 10.3 | -8.9  |
| DOHH     | 8  | 37.6 | 9.0  | 28.6 | -19.6 |
| MAU2     | 0  | 11.9 | 5.9  | 6.1  | -0.2  |
| SHC2     | 0  | 12.7 | 4.6  | 8.1  | -3.5  |
| ABHD17A  | 8  | 43.1 | 9.7  | 33.4 | -23.6 |
| GAMT     | 2  | 11.7 | 3.1  | 8.5  | -5.4  |
| PUDP     | 0  | 5.8  | 2.6  | 3.2  | -0.6  |
| ERMARD   | 0  | 7.7  | 2.0  | 5.7  | -3.7  |
| PHF10    | 1  | 8.3  | 4.9  | 3.4  | 1.5   |
| SAT1     | 0  | 7.3  | 3.4  | 4.0  | -0.6  |
| GNL3L    | 0  | 10.8 | 5.7  | 5.1  | 0.5   |
| SH3BP4   | 3  | 15.9 | 9.2  | 6.8  | 2.4   |
| MOSPD2   | 1  | 16.9 | 13.4 | 3.6  | 9.8   |
| DOCK6    | 0  | 11.5 | 4.7  | 6.8  | -2.1  |
| ECSIT    | 8  | 15.3 | 3.2  | 12.0 | -8.8  |
| LDLR     | 0  | 7.6  | 3.1  | 4.4  | -1.3  |
| ELOF1    | 8  | 20.3 | 6.1  | 14.2 | -8.0  |
| PRKCSH   | 8  | 10.7 | 2.3  | 8.3  | -6.0  |
| CNN1     | 3  | 11.6 | 3.5  | 8.0  | -4.5  |
| CDC16    | 1  | 9.0  | 5.0  | 4.0  | 1.0   |
| THEM6    | 2  | 19.2 | 7.5  | 11.7 | -4.2  |
| PVRL2    | 0  | 9.1  | 4.2  | 4.9  | -0.7  |

|          |    |      |      |      |       |
|----------|----|------|------|------|-------|
| APOE     | 4  | 12.4 | 5.6  | 6.8  | -1.2  |
| TOMM40   | 5  | 21.5 | 4.3  | 17.1 | -12.8 |
| APOC1    | 4  | 14.5 | 7.3  | 7.2  | 0.1   |
| XPO7     | 0  | 8.6  | 4.5  | 4.1  | 0.4   |
| FAM98C   | 2  | 27.6 | 13.1 | 14.4 | -1.3  |
| SAFB2    | 1  | 8.1  | 4.2  | 3.9  | 0.2   |
| RPL36    | 6  | 21.2 | 5.1  | 16.2 | -11.1 |
| GTPBP3   | 8  | 18.7 | 3.6  | 15.0 | -11.4 |
| BST2     | 0  | 9.2  | 3.9  | 5.3  | -1.5  |
| NSUN5    | 2  | 29.7 | 14.1 | 15.6 | -1.6  |
| COLGALT1 | 11 | 14.4 | 0.9  | 13.5 | -12.6 |
| DDA1     | 8  | 18.5 | 3.6  | 15.0 | -11.4 |
| MRPL34   | 8  | 15.2 | 3.3  | 11.9 | -8.6  |
| PGLS     | 8  | 17.7 | 3.2  | 14.5 | -11.3 |
| LSM7     | 8  | 24.3 | 8.3  | 15.9 | -7.6  |
| TULP4    | 0  | 9.8  | 4.2  | 5.7  | -1.5  |
| SNX9     | 0  | 7.3  | 2.0  | 5.3  | -3.4  |
| RTN4IP1  | 2  | 15.4 | 5.0  | 10.3 | -5.3  |
| QRSL1    | 0  | 8.8  | 2.7  | 6.1  | -3.4  |
| C6orf203 | 0  | 7.2  | 2.8  | 4.4  | -1.6  |
| MLLT1    | 8  | 15.0 | 3.9  | 11.1 | -7.2  |
| MLLT4    | 1  | 13.1 | 7.8  | 5.3  | 2.5   |
| ACTN4    | 3  | 15.0 | 7.5  | 7.5  | 0.0   |
| NDUFA10  | 2  | 10.9 | 3.9  | 7.0  | -3.1  |
| ARPC1B   | 3  | 17.0 | 4.5  | 12.5 | -8.1  |
| MAP1S    | 3  | 10.9 | 3.8  | 7.1  | -3.3  |
| SCO2     | 2  | 19.7 | 8.4  | 11.3 | -2.9  |
| SSBP4    | 0  | 7.3  | 3.2  | 4.0  | -0.8  |
| GDF15    | 4  | 19.7 | 8.0  | 11.7 | -3.7  |
| PGPEP1   | 4  | 15.6 | 4.1  | 11.5 | -7.4  |
| LSM4     | 5  | 18.2 | 4.7  | 13.6 | -8.9  |
| JUND     | 2  | 14.0 | 4.7  | 9.3  | -4.5  |
| TRPM4    | 0  | 10.7 | 4.2  | 6.6  | -2.4  |
| CRB3     | 4  | 30.4 | 12.8 | 17.6 | -4.7  |
| CAMSAP1  | 0  | 11.3 | 4.6  | 6.7  | -2.0  |
| UBAC1    | 10 | 20.3 | 5.9  | 14.5 | -8.6  |
| HELZ2    | 0  | 10.4 | 4.8  | 5.6  | -0.8  |
| COL5A1   | 3  | 17.0 | 8.5  | 8.5  | 0.0   |
| ATXN10   | 1  | 45.8 | 38.6 | 7.2  | 31.4  |
| TUBGCP2  | 0  | 13.7 | 6.5  | 7.2  | -0.7  |
| PAK4     | 2  | 15.2 | 4.7  | 10.4 | -5.7  |
| ZNF337   | 0  | 7.9  | 2.7  | 5.2  | -2.5  |
| CEP85    | 0  | 12.3 | 4.8  | 7.5  | -2.6  |
| TAF4     | 1  | 19.1 | 11.7 | 7.4  | 4.3   |
| LAMA5    | 0  | 5.2  | 2.2  | 3.0  | -0.8  |
| OSBPL2   | 0  | 8.6  | 3.1  | 5.5  | -2.5  |
| ADRM1    | 2  | 24.5 | 9.6  | 14.9 | -5.3  |
| ASS1     | 4  | 11.5 | 3.7  | 7.8  | -4.1  |
| EXOSC2   | 10 | 14.4 | 1.9  | 12.6 | -10.7 |
| POMT1    | 10 | 13.6 | 2.2  | 11.4 | -9.1  |
| UCK1     | 10 | 16.8 | 4.0  | 12.8 | -8.8  |
| PRRC2B   | 0  | 15.0 | 7.8  | 7.2  | 0.7   |
| CHMP2A   | 0  | 10.9 | 4.8  | 6.1  | -1.2  |
| UBE2M    | 0  | 7.9  | 2.9  | 5.0  | -2.1  |

|           |    |       |       |      |       |
|-----------|----|-------|-------|------|-------|
| TRIM28    | 6  | 16.5  | 4.5   | 12.0 | -7.6  |
| C16orf13  | 12 | 23.2  | 3.9   | 19.3 | -15.4 |
| YIPF2     | 8  | 20.6  | 3.6   | 17.1 | -13.5 |
| ATG4D     | 8  | 10.0  | 1.5   | 8.5  | -7.0  |
| EIF2S3    | 1  | 22.5  | 19.5  | 3.0  | 16.6  |
| TMEM160   | 2  | 28.2  | 14.2  | 14.0 | 0.3   |
| ZC3H4     | 0  | 14.2  | 7.0   | 7.3  | -0.3  |
| MAP3K10   | 0  | 9.2   | 4.1   | 5.1  | -1.0  |
| LRRC47    | 6  | 12.7  | 3.0   | 9.6  | -6.6  |
| SESN2     | 2  | 15.7  | 5.4   | 10.3 | -4.9  |
| ATPIF1    | 0  | 9.3   | 3.9   | 5.4  | -1.4  |
| MED18     | 0  | 9.3   | 4.3   | 4.9  | -0.6  |
| CLIP1     | 1  | 42.2  | 37.7  | 4.4  | 33.3  |
| HIP1R     | 4  | 16.0  | 4.4   | 11.6 | -7.1  |
| ZNF317    | 8  | 16.8  | 4.0   | 12.8 | -8.8  |
| PPAN      | 8  | 19.9  | 5.3   | 14.7 | -9.4  |
| EIF3G     | 8  | 23.6  | 11.1  | 12.5 | -1.4  |
| C19orf66  | 0  | 9.5   | 4.4   | 5.0  | -0.6  |
| DNMT1     | 7  | 21.6  | 2.8   | 18.8 | -16.0 |
| SLC6A8    | 0  | 8.8   | 3.6   | 5.2  | -1.6  |
| DKC1      | 6  | 24.9  | 2.9   | 22.0 | -19.1 |
| PLXNA3    | 0  | 8.1   | 3.2   | 4.9  | -1.7  |
| MPP1      | 0  | 5.7   | 2.3   | 3.4  | -1.1  |
| LRP3      | 4  | 12.7  | 3.7   | 9.0  | -5.4  |
| C12orf65  | 0  | 9.6   | 3.2   | 6.4  | -3.1  |
| NOL11     | 1  | 99.3  | 87.3  | 12.0 | 75.3  |
| UBE4B     | 0  | 8.4   | 4.4   | 4.0  | 0.4   |
| HABP4     | 0  | 9.1   | 4.0   | 5.1  | -1.1  |
| SLC35D2   | 4  | 14.6  | 5.8   | 8.8  | -2.9  |
| PRRG1     | 0  | 5.1   | 2.0   | 3.2  | -1.2  |
| UBA1      | 0  | 12.2  | 5.5   | 6.7  | -1.2  |
| PPIL4     | 1  | 38.0  | 32.4  | 5.6  | 26.8  |
| AKAP12    | 1  | 12.3  | 5.3   | 7.1  | -1.8  |
| SYNE1     | 1  | 12.4  | 6.9   | 5.5  | 1.4   |
| LATS1     | 1  | 14.7  | 11.5  | 3.2  | 8.3   |
| AAR2      | 2  | 21.3  | 8.5   | 12.8 | -4.4  |
| RBM39     | 1  | 139.1 | 133.5 | 5.6  | 127.9 |
| GGT7      | 0  | 10.5  | 6.1   | 4.4  | 1.8   |
| ACSS2     | 0  | 7.2   | 2.9   | 4.3  | -1.5  |
| ATP6V1E1  | 0  | 6.8   | 1.9   | 4.8  | -2.9  |
| ZNF227    | 1  | 9.0   | 6.2   | 2.9  | 3.3   |
| ZNF428    | 0  | 12.4  | 4.9   | 7.4  | -2.5  |
| COX4I1    | 2  | 13.6  | 4.9   | 8.7  | -3.8  |
| EMC8      | 6  | 17.1  | 5.6   | 11.5 | -6.0  |
| GSE1      | 0  | 12.4  | 6.1   | 6.3  | -0.2  |
| GINS2     | 5  | 17.5  | 3.3   | 14.2 | -10.9 |
| CHMP1A    | 0  | 12.3  | 5.1   | 7.2  | -2.1  |
| SH3BGRL   | 0  | 6.3   | 1.9   | 4.4  | -2.5  |
| COX7B     | 6  | 33.8  | 13.5  | 20.3 | -6.8  |
| PRR7      | 2  | 46.5  | 26.4  | 20.2 | 6.2   |
| CAP1      | 1  | 20.1  | 9.2   | 11.0 | -1.8  |
| PPT1      | 0  | 7.5   | 2.7   | 4.8  | -2.1  |
| RAB11FIP4 | 4  | 24.9  | 12.1  | 12.8 | -0.6  |
| RLIM      | 1  | 23.0  | 20.0  | 3.1  | 16.9  |



|          |    |      |      |      |       |
|----------|----|------|------|------|-------|
| ABCB7    | 1  | 13.1 | 9.6  | 3.5  | 6.1   |
| TRAF3    | 0  | 10.5 | 4.7  | 5.8  | -1.1  |
| HAUS8    | 5  | 12.9 | 3.2  | 9.8  | -6.6  |
| MRPS25   | 0  | 11.8 | 5.4  | 6.5  | -1.1  |
| SH3BP5   | 0  | 6.2  | 2.8  | 3.5  | -0.7  |
| HACL1    | 0  | 8.7  | 3.8  | 4.9  | -1.1  |
| TBC1D5   | 0  | 11.1 | 4.9  | 6.2  | -1.2  |
| CAPN7    | 1  | 32.5 | 28.2 | 4.3  | 24.0  |
| RFTN1    | 3  | 16.0 | 8.2  | 7.8  | 0.3   |
| RBSN     | 0  | 11.7 | 6.3  | 5.5  | 0.8   |
| SLC6A6   | 0  | 7.0  | 2.1  | 4.9  | -2.8  |
| NR1H2    | 3  | 19.0 | 5.3  | 13.7 | -8.4  |
| KIF3A    | 1  | 24.2 | 19.6 | 4.6  | 15.1  |
| MGAT1    | 0  | 12.3 | 4.8  | 7.6  | -2.8  |
| TUBG1    | 5  | 19.9 | 4.9  | 15.0 | -10.1 |
| PSME3    | 0  | 15.3 | 6.6  | 8.7  | -2.2  |
| RPL27    | 2  | 14.9 | 5.0  | 9.9  | -4.9  |
| PSMC3IP  | 5  | 13.9 | 4.9  | 9.0  | -4.1  |
| ACLY     | 0  | 8.7  | 4.1  | 4.6  | -0.5  |
| VPS25    | 2  | 21.5 | 7.8  | 13.6 | -5.8  |
| NDUFA2   | 0  | 14.1 | 5.6  | 8.4  | -2.8  |
| ANKHD1   | 1  | 39.7 | 35.8 | 4.0  | 31.8  |
| DIAPH1   | 0  | 8.3  | 3.2  | 5.1  | -2.0  |
| NDFIP1   | 0  | 8.9  | 3.7  | 5.2  | -1.5  |
| UBE2D2   | 1  | 13.8 | 7.8  | 6.0  | 1.8   |
| EXOC4    | 3  | 13.2 | 3.9  | 9.4  | -5.5  |
| ACAP3    | 0  | 14.4 | 5.5  | 8.9  | -3.3  |
| C1orf159 | 2  | 29.5 | 12.9 | 16.6 | -3.7  |
| PPF1A1   | 1  | 11.1 | 7.8  | 3.3  | 4.5   |
| THOC6    | 12 | 10.1 | 1.7  | 8.4  | -6.7  |
| TRAF7    | 0  | 7.9  | 3.7  | 4.1  | -0.4  |
| NINJ1    | 10 | 13.3 | 1.5  | 11.8 | -10.3 |
| IL13RA1  | 0  | 8.4  | 3.3  | 5.1  | -1.8  |
| WDR44    | 0  | 6.9  | 2.4  | 4.5  | -2.2  |
| ZCCHC9   | 1  | 17.3 | 11.9 | 5.3  | 6.6   |
| TOP2A    | 1  | 69.5 | 53.0 | 16.5 | 36.6  |
| STARD3   | 0  | 11.8 | 5.4  | 6.4  | -0.9  |
| RARA     | 3  | 17.3 | 5.2  | 12.1 | -6.8  |
| KHDRBS3  | 0  | 4.3  | 1.8  | 2.5  | -0.7  |
| CHD1L    | 9  | 10.7 | 1.4  | 9.3  | -7.9  |
| PEX11B   | 0  | 13.4 | 4.7  | 8.7  | -3.9  |
| PIAS3    | 3  | 12.9 | 4.0  | 8.9  | -4.9  |
| PRKAB2   | 4  | 8.1  | 2.1  | 6.0  | -3.9  |
| PDHA1    | 6  | 17.7 | 3.2  | 14.5 | -11.3 |
| MCCC2    | 4  | 13.2 | 3.7  | 9.5  | -5.8  |
| ZSCAN5A  | 0  | 12.0 | 4.9  | 7.1  | -2.2  |
| VIMP     | 0  | 8.1  | 3.0  | 5.0  | -2.0  |
| CHSY1    | 0  | 11.9 | 3.7  | 8.2  | -4.6  |
| SNRPA1   | 1  | 26.2 | 19.9 | 6.3  | 13.6  |
| LLGL1    | 0  | 15.1 | 6.4  | 8.7  | -2.3  |
| THAP1    | 1  | 14.3 | 9.7  | 4.6  | 5.1   |
| RHPN2    | 4  | 10.1 | 3.3  | 6.8  | -3.4  |
| C19orf12 | 0  | 8.0  | 3.6  | 4.4  | -0.8  |
| FAAP24   | 0  | 8.7  | 3.6  | 5.1  | -1.5  |

|          |   |      |      |      |       |
|----------|---|------|------|------|-------|
| ACTR10   | 1 | 31.0 | 25.9 | 5.1  | 20.8  |
| LGALS3   | 0 | 4.1  | 1.7  | 2.4  | -0.7  |
| DNAJB1   | 8 | 7.1  | 1.4  | 5.7  | -4.4  |
| FBXW9    | 2 | 47.1 | 23.9 | 23.3 | 0.6   |
| RFX1     | 8 | 9.6  | 1.3  | 8.3  | -6.9  |
| DCAF15   | 8 | 22.6 | 7.9  | 14.6 | -6.7  |
| CC2D1A   | 8 | 25.5 | 5.5  | 20.0 | -14.5 |
| TRIM21   | 0 | 16.0 | 6.2  | 9.8  | -3.6  |
| LRRC41   | 0 | 14.7 | 6.7  | 8.0  | -1.3  |
| DHX30    | 2 | 23.6 | 9.6  | 14.0 | -4.5  |
| RAF1     | 0 | 8.9  | 4.1  | 4.8  | -0.7  |
| PPARG    | 0 | 11.2 | 4.5  | 6.6  | -2.1  |
| NUP210   | 4 | 18.3 | 6.2  | 12.2 | -6.0  |
| HSD17B7  | 4 | 10.4 | 2.4  | 8.0  | -5.7  |
| ENOSF1   | 0 | 6.1  | 2.1  | 4.0  | -1.9  |
| ARFIP2   | 0 | 10.9 | 4.4  | 6.5  | -2.0  |
| TRIM5    | 0 | 5.2  | 2.3  | 2.9  | -0.6  |
| RRP8     | 0 | 14.3 | 4.9  | 9.5  | -4.6  |
| EFR3A    | 1 | 30.9 | 27.6 | 3.3  | 24.3  |
| PTCD3    | 1 | 80.9 | 74.8 | 6.1  | 68.7  |
| IMMT     | 1 | 24.8 | 20.4 | 4.4  | 15.9  |
| MRPL35   | 7 | 11.6 | 1.3  | 10.3 | -8.9  |
| ILKAP    | 0 | 10.7 | 4.5  | 6.2  | -1.7  |
| RAMP1    | 2 | 11.0 | 3.5  | 7.5  | -4.1  |
| SCLY     | 0 | 14.9 | 5.8  | 9.1  | -3.3  |
| RAN      | 5 | 21.8 | 6.4  | 15.3 | -8.9  |
| PRKAA1   | 1 | 36.9 | 32.9 | 4.0  | 28.8  |
| RAP1GAP2 | 0 | 7.7  | 3.2  | 4.5  | -1.2  |
| CLUH     | 0 | 14.0 | 4.9  | 9.1  | -4.2  |
| INPP5K   | 0 | 8.0  | 4.0  | 4.1  | -0.1  |
| MYBBP1A  | 0 | 15.4 | 6.3  | 9.1  | -2.9  |
| RPA1     | 6 | 32.2 | 6.1  | 26.1 | -19.9 |
| SERPINF1 | 4 | 10.5 | 3.9  | 6.6  | -2.6  |
| UBE2G1   | 0 | 9.6  | 4.0  | 5.6  | -1.6  |
| EEFSEC   | 2 | 31.6 | 14.9 | 16.7 | -1.9  |
| TBC1D14  | 6 | 19.4 | 4.3  | 15.1 | -10.8 |
| TMEM128  | 0 | 6.3  | 3.2  | 3.1  | 0.1   |
| COQ3     | 0 | 12.8 | 4.0  | 8.8  | -4.9  |
| PNISR    | 1 | 96.0 | 91.4 | 4.6  | 86.7  |
| POPDC3   | 0 | 4.8  | 1.9  | 2.9  | -1.0  |
| SEC61G   | 1 | 9.7  | 6.6  | 3.0  | 3.6   |
| LANCL2   | 0 | 8.4  | 3.3  | 5.1  | -1.8  |
| FIGNL1   | 7 | 28.1 | 4.7  | 23.4 | -18.6 |
| GRSF1    | 1 | 31.0 | 24.5 | 6.5  | 18.0  |
| ANKRD17  | 1 | 19.1 | 15.1 | 4.0  | 11.1  |
| UTP3     | 1 | 14.5 | 11.5 | 3.0  | 8.4   |
| ITGB4    | 0 | 7.8  | 3.3  | 4.6  | -1.3  |
| WBP2     | 3 | 17.4 | 7.2  | 10.2 | -2.9  |
| H3F3B    | 1 | 9.6  | 5.2  | 4.4  | 0.8   |
| UNK      | 0 | 8.4  | 3.7  | 4.7  | -1.0  |
| TRIM47   | 3 | 11.4 | 3.3  | 8.1  | -4.8  |
| ZRANB2   | 1 | 70.5 | 67.4 | 3.1  | 64.3  |
| EIF5A    | 0 | 14.8 | 5.9  | 8.9  | -3.0  |
| KDM6B    | 0 | 13.2 | 6.4  | 6.8  | -0.4  |

|          |    |      |      |      |       |
|----------|----|------|------|------|-------|
| GPS2     | 6  | 20.5 | 6.6  | 13.9 | -7.3  |
| HRSP12   | 1  | 16.0 | 9.8  | 6.2  | 3.6   |
| VPS13B   | 1  | 14.7 | 12.1 | 2.6  | 9.5   |
| MATN2    | 0  | 6.1  | 2.2  | 3.9  | -1.6  |
| PCBD2    | 0  | 8.3  | 3.5  | 4.8  | -1.2  |
| SDF2     | 0  | 6.5  | 3.2  | 3.3  | -0.1  |
| FLOT2    | 0  | 14.5 | 5.1  | 9.4  | -4.2  |
| ERAL1    | 2  | 22.7 | 6.7  | 16.1 | -9.4  |
| PRMT7    | 0  | 12.9 | 6.6  | 6.3  | 0.3   |
| NIP7     | 6  | 28.2 | 6.3  | 21.9 | -15.6 |
| TERF2    | 6  | 12.3 | 2.3  | 10.0 | -7.7  |
| VPS4A    | 2  | 32.7 | 16.3 | 16.4 | -0.1  |
| MTSS1L   | 0  | 7.7  | 3.6  | 4.1  | -0.5  |
| PCED1A   | 0  | 12.6 | 6.4  | 6.2  | 0.2   |
| BTBD3    | 1  | 10.5 | 5.7  | 4.7  | 1.0   |
| PCNA     | 5  | 16.3 | 7.2  | 9.0  | -1.8  |
| NXT1     | 2  | 20.1 | 8.1  | 12.0 | -3.9  |
| POLR3F   | 1  | 23.7 | 18.0 | 5.7  | 12.2  |
| RIN2     | 3  | 7.4  | 2.2  | 5.2  | -3.1  |
| PTPRA    | 0  | 11.7 | 4.7  | 7.1  | -2.4  |
| DAP3     | 0  | 10.9 | 2.4  | 8.4  | -6.0  |
| KIAA0907 | 1  | 12.4 | 8.7  | 3.6  | 5.1   |
| NES      | 0  | 6.1  | 2.9  | 3.3  | -0.4  |
| ARHGEF11 | 9  | 10.7 | 3.0  | 7.7  | -4.7  |
| DCAF8    | 9  | 10.8 | 1.6  | 9.2  | -7.7  |
| IGHMBP2  | 0  | 6.5  | 3.3  | 3.2  | 0.1   |
| MTL5     | 0  | 8.0  | 3.4  | 4.5  | -1.1  |
| MMACHC   | 2  | 25.0 | 11.9 | 13.1 | -1.3  |
| DPH2     | 2  | 16.8 | 6.2  | 10.6 | -4.4  |
| TOE1     | 2  | 21.2 | 7.4  | 13.8 | -6.4  |
| NASP     | 1  | 32.5 | 25.7 | 6.8  | 19.0  |
| MUTYH    | 2  | 17.6 | 7.5  | 10.1 | -2.7  |
| CTNBL1   | 6  | 18.4 | 2.3  | 16.2 | -13.9 |
| LPIN3    | 0  | 12.5 | 5.6  | 6.9  | -1.2  |
| RBM38    | 11 | 26.0 | 1.7  | 24.3 | -22.7 |
| OSER1    | 0  | 9.1  | 3.6  | 5.5  | -1.9  |
| SERINC3  | 1  | 14.7 | 10.4 | 4.4  | 6.0   |
| BHMT2    | 0  | 10.0 | 4.5  | 5.5  | -0.9  |
| AP3B1    | 1  | 41.2 | 36.6 | 4.6  | 32.0  |
| INADL    | 1  | 8.1  | 5.1  | 3.0  | 2.0   |
| FBX044   | 2  | 18.5 | 8.0  | 10.5 | -2.4  |
| CASP9    | 2  | 19.2 | 7.7  | 11.5 | -3.8  |
| DCTN4    | 1  | 15.5 | 11.8 | 3.8  | 8.0   |
| ZMYM5    | 1  | 14.8 | 9.9  | 4.9  | 4.9   |
| USPL1    | 1  | 18.5 | 15.8 | 2.7  | 13.0  |
| XPO4     | 1  | 13.3 | 8.3  | 5.1  | 3.2   |
| POMP     | 1  | 15.5 | 11.0 | 4.5  | 6.5   |
| CDK8     | 1  | 13.1 | 7.4  | 5.7  | 1.7   |
| MYH10    | 1  | 16.4 | 11.0 | 5.4  | 5.6   |
| PEMT     | 0  | 8.6  | 3.6  | 5.0  | -1.5  |
| SCO1     | 0  | 10.8 | 3.7  | 7.1  | -3.5  |
| MPRIP    | 3  | 6.2  | 2.1  | 4.2  | -2.1  |
| PIK3C2B  | 4  | 17.8 | 5.1  | 12.6 | -7.5  |
| SLC41A1  | 3  | 16.5 | 8.6  | 8.0  | 0.6   |

|           |   |       |      |      |       |
|-----------|---|-------|------|------|-------|
| COG6      | 1 | 17.0  | 14.3 | 2.8  | 11.5  |
| TPT1      | 1 | 19.6  | 16.4 | 3.1  | 13.3  |
| GPALPP1   | 0 | 8.6   | 2.8  | 5.8  | -3.0  |
| RFC3      | 7 | 32.9  | 5.1  | 27.8 | -22.7 |
| MORC4     | 3 | 10.6  | 4.5  | 6.1  | -1.6  |
| RNF128    | 4 | 13.4  | 5.7  | 7.7  | -2.0  |
| TCEAL4    | 1 | 11.4  | 6.6  | 4.8  | 1.8   |
| FAM104A   | 0 | 6.5   | 2.7  | 3.8  | -1.1  |
| SLC39A11  | 0 | 11.5  | 4.6  | 6.9  | -2.3  |
| EPHB2     | 3 | 21.7  | 13.7 | 7.9  | 5.8   |
| SRRM1     | 0 | 13.1  | 4.3  | 8.8  | -4.4  |
| BTBD2     | 8 | 7.6   | 1.4  | 6.2  | -4.9  |
| KMT5C     | 2 | 14.7  | 4.4  | 10.3 | -5.8  |
| ZNF414    | 8 | 15.9  | 5.3  | 10.6 | -5.3  |
| HSPBP1    | 2 | 21.0  | 7.7  | 13.3 | -5.7  |
| CSNK1G2   | 8 | 10.8  | 3.7  | 7.1  | -3.4  |
| SLF1      | 7 | 34.1  | 5.0  | 29.1 | -24.1 |
| CNDP2     | 0 | 11.5  | 4.6  | 6.9  | -2.2  |
| MACROD1   | 0 | 6.9   | 3.2  | 3.7  | -0.6  |
| WDR74     | 2 | 20.2  | 8.0  | 12.3 | -4.3  |
| RTN3      | 0 | 8.9   | 3.8  | 5.2  | -1.4  |
| RARRES3   | 3 | 14.9  | 4.3  | 10.6 | -6.4  |
| FOPNL     | 1 | 29.9  | 25.2 | 4.7  | 20.6  |
| MED10     | 0 | 6.8   | 2.8  | 4.0  | -1.1  |
| MORC2     | 0 | 5.7   | 2.4  | 3.3  | -0.9  |
| LARGE     | 2 | 16.0  | 4.7  | 11.4 | -6.7  |
| SLC2A11   | 0 | 13.1  | 6.1  | 7.0  | -0.9  |
| ADCK2     | 2 | 13.6  | 4.3  | 9.3  | -5.0  |
| MKRN1     | 1 | 16.2  | 11.7 | 4.5  | 7.2   |
| AGAP3     | 0 | 6.7   | 2.9  | 3.8  | -0.9  |
| ACTR3B    | 2 | 12.7  | 4.1  | 8.6  | -4.4  |
| BTG1      | 0 | 7.2   | 3.1  | 4.1  | -0.9  |
| C12orf29  | 1 | 33.6  | 24.2 | 9.4  | 14.8  |
| ATP13A3   | 1 | 48.4  | 44.9 | 3.5  | 41.4  |
| TMEM254   | 0 | 7.0   | 3.3  | 3.7  | -0.4  |
| KRAS      | 1 | 27.7  | 22.8 | 4.9  | 18.0  |
| IPO8      | 1 | 33.8  | 30.0 | 3.8  | 26.3  |
| LARS      | 1 | 94.8  | 89.7 | 5.1  | 84.6  |
| IMPA1     | 1 | 23.2  | 20.1 | 3.0  | 17.1  |
| E2F5      | 0 | 7.9   | 2.9  | 5.0  | -2.1  |
| CCDC59    | 1 | 29.8  | 23.0 | 6.8  | 16.2  |
| SWAP70    | 1 | 16.1  | 11.0 | 5.0  | 6.0   |
| ARNTL     | 1 | 10.2  | 4.9  | 5.3  | -0.5  |
| SBF2      | 1 | 23.8  | 18.0 | 5.8  | 12.3  |
| MICAL2    | 3 | 18.7  | 11.1 | 7.6  | 3.5   |
| RRAS2     | 3 | 14.5  | 6.1  | 8.4  | -2.2  |
| HSD17B4   | 1 | 108.2 | 98.3 | 9.9  | 88.3  |
| ZFC3H1    | 1 | 52.5  | 47.2 | 5.3  | 41.9  |
| SARAF     | 1 | 31.1  | 27.2 | 3.8  | 23.4  |
| DPF2      | 0 | 9.5   | 4.6  | 4.8  | -0.2  |
| MEN1      | 2 | 30.2  | 14.8 | 15.4 | -0.6  |
| C14orf1   | 2 | 16.3  | 5.1  | 11.3 | -6.2  |
| C14orf159 | 0 | 6.2   | 2.7  | 3.5  | -0.8  |
| NUMB      | 0 | 10.0  | 4.6  | 5.4  | -0.9  |

|           |   |      |      |      |       |
|-----------|---|------|------|------|-------|
| COX16     | 1 | 13.9 | 9.7  | 4.2  | 5.5   |
| MED6      | 1 | 28.0 | 21.2 | 6.8  | 14.5  |
| EIF2S1    | 1 | 53.8 | 44.0 | 9.8  | 34.3  |
| LOXL2     | 3 | 12.4 | 5.5  | 6.8  | -1.3  |
| ELP3      | 0 | 8.4  | 3.3  | 5.0  | -1.7  |
| CTIF      | 3 | 10.3 | 3.7  | 6.6  | -2.9  |
| MBD2      | 6 | 41.2 | 17.1 | 24.0 | -6.9  |
| IER3IP1   | 0 | 6.7  | 2.5  | 4.2  | -1.7  |
| MRPS36    | 6 | 68.1 | 15.9 | 52.1 | -36.2 |
| CCNB1     | 5 | 31.9 | 20.9 | 11.0 | 9.8   |
| CDK7      | 1 | 64.9 | 54.8 | 10.1 | 44.6  |
| IRAK2     | 0 | 12.8 | 5.0  | 7.7  | -2.7  |
| CAMK1     | 0 | 12.1 | 4.4  | 7.7  | -3.2  |
| THUMPD3   | 1 | 24.2 | 19.5 | 4.7  | 14.8  |
| VHL       | 0 | 9.8  | 5.2  | 4.6  | 0.6   |
| BHLHE40   | 0 | 7.0  | 3.5  | 3.6  | -0.1  |
| ARL8B     | 1 | 30.4 | 26.5 | 3.9  | 22.6  |
| EDEM1     | 0 | 7.0  | 3.5  | 3.5  | -0.1  |
| MEIS2     | 0 | 7.6  | 2.5  | 5.1  | -2.5  |
| DPH6      | 0 | 9.3  | 3.3  | 6.0  | -2.7  |
| KATNBL1   | 1 | 39.8 | 32.6 | 7.1  | 25.5  |
| EMC7      | 1 | 10.9 | 6.8  | 4.1  | 2.8   |
| PRPF38B   | 1 | 81.7 | 78.0 | 3.7  | 74.3  |
| GSTM3     | 0 | 4.9  | 2.3  | 2.6  | -0.3  |
| PSRC1     | 5 | 14.0 | 3.2  | 10.8 | -7.6  |
| SORT1     | 1 | 8.2  | 4.9  | 3.3  | 1.5   |
| PTGFRN    | 3 | 8.9  | 3.6  | 5.4  | -1.8  |
| LAMTOR5   | 0 | 6.9  | 2.5  | 4.4  | -1.8  |
| NOTCH2    | 3 | 20.1 | 12.6 | 7.6  | 5.0   |
| CEPT1     | 1 | 35.0 | 31.0 | 4.1  | 26.9  |
| AP4B1     | 0 | 8.0  | 3.7  | 4.3  | -0.5  |
| NAPG      | 1 | 11.3 | 8.5  | 2.8  | 5.7   |
| SPIRE1    | 0 | 6.7  | 2.0  | 4.7  | -2.8  |
| PPHLN1    | 1 | 41.2 | 36.9 | 4.2  | 32.7  |
| FKBP11    | 0 | 8.5  | 3.1  | 5.3  | -2.2  |
| ARF3      | 0 | 8.0  | 3.1  | 4.9  | -1.9  |
| TMEM106C  | 5 | 21.1 | 12.0 | 9.2  | 2.8   |
| SLC38A2   | 1 | 68.5 | 64.5 | 4.1  | 60.4  |
| YWHAQ     | 1 | 17.4 | 8.9  | 8.6  | 0.3   |
| KIDINS220 | 1 | 31.4 | 28.3 | 3.1  | 25.2  |
| ROCK2     | 1 | 35.6 | 32.0 | 3.7  | 28.3  |
| LPIN1     | 0 | 7.3  | 1.9  | 5.4  | -3.4  |
| IAH1      | 3 | 8.0  | 2.3  | 5.6  | -3.3  |
| LDHA      | 7 | 12.6 | 1.3  | 11.3 | -10.0 |
| IL6ST     | 1 | 56.4 | 50.6 | 5.9  | 44.7  |
| NAV1      | 3 | 23.2 | 13.8 | 9.4  | 4.4   |
| CDC73     | 1 | 27.8 | 23.2 | 4.6  | 18.6  |
| TIMM17A   | 1 | 53.2 | 47.0 | 6.2  | 40.8  |
| RPS15A    | 0 | 10.5 | 3.6  | 6.9  | -3.3  |
| NARS      | 1 | 53.9 | 50.4 | 3.4  | 47.0  |
| KIAA1468  | 1 | 14.0 | 11.3 | 2.6  | 8.7   |
| FBXO18    | 0 | 5.7  | 2.7  | 3.0  | -0.4  |
| RBM17     | 1 | 34.8 | 30.8 | 4.0  | 26.8  |
| ANKRD16   | 2 | 32.5 | 17.5 | 15.0 | 2.5   |

|         |   |      |      |      |       |
|---------|---|------|------|------|-------|
| ECHDC3  | 2 | 14.9 | 4.5  | 10.4 | -5.9  |
| IL15RA  | 9 | 19.3 | 1.3  | 18.0 | -16.6 |
| CCNH    | 1 | 51.6 | 44.0 | 7.6  | 36.4  |
| TMEM241 | 0 | 14.4 | 5.9  | 8.5  | -2.5  |
| KCTD1   | 3 | 10.3 | 4.3  | 6.1  | -1.8  |
| CABLES1 | 2 | 9.9  | 3.2  | 6.7  | -3.6  |
| EMP1    | 3 | 9.3  | 4.1  | 5.2  | -1.1  |
| DDB2    | 0 | 6.1  | 2.5  | 3.6  | -1.2  |
| ACP2    | 4 | 16.1 | 5.1  | 11.0 | -5.9  |
| FAM127A | 3 | 16.0 | 7.1  | 8.9  | -1.8  |
| RBMX2   | 0 | 6.5  | 3.0  | 3.5  | -0.6  |
| STK26   | 1 | 12.7 | 8.3  | 4.4  | 3.8   |
| PUM1    | 0 | 18.9 | 6.4  | 12.5 | -6.1  |
| SPOCD1  | 3 | 16.3 | 9.9  | 6.4  | 3.5   |
| YARS    | 0 | 9.8  | 4.4  | 5.4  | -1.0  |
| PHC2    | 3 | 18.4 | 5.3  | 13.1 | -7.8  |
| CDC48   | 5 | 20.6 | 8.7  | 11.9 | -3.2  |
| GNL2    | 1 | 55.0 | 49.2 | 5.8  | 43.4  |
| AGO4    | 1 | 16.1 | 12.0 | 4.1  | 8.0   |
| HOOK1   | 1 | 13.9 | 10.3 | 3.6  | 6.6   |
| BTF3L4  | 1 | 18.1 | 12.9 | 5.2  | 7.8   |
| ZCCHC11 | 1 | 61.1 | 56.3 | 4.8  | 51.5  |
| PRPF38A | 0 | 13.2 | 4.9  | 8.4  | -3.5  |
| RNF138  | 1 | 19.3 | 14.3 | 5.0  | 9.3   |
| ELP2    | 1 | 16.6 | 12.7 | 3.9  | 8.7   |
| DTNA    | 0 | 8.8  | 3.9  | 4.9  | -1.0  |
| TPGS2   | 3 | 12.1 | 4.9  | 7.1  | -2.2  |
| SLC43A3 | 3 | 14.1 | 5.6  | 8.5  | -2.9  |
| TIMM10  | 5 | 16.7 | 4.0  | 12.7 | -8.7  |
| DHX34   | 2 | 22.5 | 10.3 | 12.2 | -1.9  |
| FADS2   | 0 | 4.7  | 1.9  | 2.9  | -1.0  |
| TMEM258 | 0 | 13.2 | 6.1  | 7.2  | -1.1  |
| TMEM165 | 1 | 8.0  | 4.4  | 3.6  | 0.9   |
| CLOCK   | 1 | 13.5 | 10.7 | 2.8  | 7.9   |
| COL4A2  | 3 | 16.2 | 10.8 | 5.4  | 5.4   |
| UBAC2   | 0 | 8.5  | 4.1  | 4.5  | -0.4  |
| ARGLU1  | 1 | 69.7 | 64.9 | 4.8  | 60.1  |
| BIVM    | 1 | 10.2 | 7.4  | 2.8  | 4.6   |
| ERCC5   | 1 | 9.9  | 7.0  | 2.9  | 4.0   |
| TPP2    | 1 | 25.8 | 22.5 | 3.3  | 19.2  |
| KDELC1  | 0 | 7.2  | 3.0  | 4.2  | -1.2  |
| CARS2   | 0 | 7.0  | 3.2  | 3.8  | -0.6  |
| STT3A   | 0 | 8.1  | 4.0  | 4.1  | -0.2  |
| ETS1    | 3 | 28.1 | 17.6 | 10.5 | 7.0   |
| TMED7   | 1 | 49.1 | 45.6 | 3.4  | 42.2  |
| NREP    | 0 | 7.1  | 3.2  | 3.9  | -0.7  |
| WDR36   | 1 | 18.9 | 15.8 | 3.2  | 12.6  |
| OSTF1   | 0 | 6.4  | 2.7  | 3.8  | -1.1  |
| RFK     | 1 | 25.3 | 21.5 | 3.8  | 17.7  |
| UBQLN1  | 1 | 58.7 | 53.2 | 5.5  | 47.6  |
| NAA35   | 1 | 16.9 | 12.7 | 4.2  | 8.5   |
| C9orf40 | 2 | 17.2 | 6.5  | 10.8 | -4.3  |
| ANXA1   | 3 | 12.8 | 6.8  | 6.0  | 0.8   |
| CTSL    | 0 | 8.2  | 3.7  | 4.4  | -0.7  |

|          |   |      |      |      |      |
|----------|---|------|------|------|------|
| TMEM2    | 1 | 10.7 | 7.5  | 3.2  | 4.4  |
| AGTPBP1  | 1 | 14.6 | 9.9  | 4.7  | 5.2  |
| GOLM1    | 3 | 8.4  | 3.5  | 5.0  | -1.5 |
| PSAT1    | 0 | 10.2 | 3.5  | 6.8  | -3.3 |
| ISCA1    | 0 | 9.9  | 3.3  | 6.6  | -3.3 |
| ADAM19   | 3 | 11.9 | 5.3  | 6.6  | -1.3 |
| CCNJL    | 0 | 6.2  | 3.0  | 3.2  | -0.2 |
| TAOK3    | 1 | 11.7 | 8.6  | 3.1  | 5.5  |
| USP30    | 0 | 8.7  | 4.0  | 4.7  | -0.8 |
| HNF1A    | 4 | 38.3 | 21.7 | 16.6 | 5.1  |
| FBXO21   | 0 | 10.6 | 4.7  | 5.9  | -1.2 |
| TBX3     | 0 | 8.0  | 4.1  | 3.9  | 0.1  |
| P2RX4    | 4 | 11.2 | 3.3  | 7.9  | -4.6 |
| TRAFD1   | 0 | 9.4  | 4.0  | 5.4  | -1.4 |
| DMTF1    | 1 | 98.6 | 93.5 | 5.1  | 88.4 |
| TMEM243  | 0 | 9.0  | 3.0  | 6.0  | -3.0 |
| TMEM60   | 0 | 7.1  | 2.5  | 4.6  | -2.0 |
| PNPLA8   | 1 | 21.1 | 18.2 | 3.0  | 15.2 |
| HILPDA   | 0 | 11.7 | 5.2  | 6.4  | -1.2 |
| RINT1    | 1 | 39.1 | 32.7 | 6.4  | 26.2 |
| SRPK2    | 1 | 24.1 | 21.4 | 2.7  | 18.7 |
| TES      | 0 | 6.3  | 1.8  | 4.5  | -2.7 |
| MDFIC    | 1 | 7.5  | 3.5  | 3.9  | -0.4 |
| MT01     | 1 | 10.9 | 6.6  | 4.2  | 2.4  |
| SYNCRIP  | 1 | 84.2 | 76.8 | 7.4  | 69.4 |
| SNX14    | 1 | 69.2 | 62.3 | 6.9  | 55.4 |
| NT5E     | 3 | 7.8  | 2.8  | 5.0  | -2.2 |
| AKIRIN2  | 0 | 5.3  | 2.3  | 3.0  | -0.7 |
| ORC3     | 1 | 29.3 | 21.1 | 8.2  | 12.8 |
| MAP3K7   | 1 | 29.6 | 26.8 | 2.9  | 23.9 |
| PHF21A   | 0 | 8.2  | 2.8  | 5.3  | -2.5 |
| NAT10    | 0 | 18.1 | 6.5  | 11.5 | -5.0 |
| CAPRIN1  | 1 | 92.5 | 85.3 | 7.2  | 78.1 |
| ATP5G2   | 2 | 15.6 | 5.9  | 9.7  | -3.8 |
| DNAJC14  | 2 | 16.6 | 5.5  | 11.1 | -5.6 |
| CD63     | 0 | 10.4 | 4.8  | 5.6  | -0.8 |
| GDF11    | 0 | 8.6  | 4.7  | 4.0  | 0.7  |
| ITGA7    | 0 | 5.6  | 2.8  | 2.8  | 0.0  |
| BLOC1S1  | 2 | 13.8 | 4.4  | 9.4  | -5.0 |
| CDK4     | 0 | 12.8 | 5.1  | 7.7  | -2.6 |
| TROAP    | 5 | 18.6 | 8.8  | 9.8  | -1.1 |
| TSPAN31  | 0 | 6.6  | 3.4  | 3.2  | 0.2  |
| B4GALNT1 | 0 | 7.0  | 3.1  | 3.9  | -0.8 |
| TFCP2    | 0 | 5.6  | 1.7  | 3.9  | -2.3 |
| COQ10A   | 0 | 8.7  | 4.2  | 4.5  | -0.4 |
| PAN2     | 0 | 10.3 | 3.5  | 6.8  | -3.2 |
| ESPL1    | 5 | 17.7 | 5.9  | 11.7 | -5.8 |
| KRT7     | 3 | 14.9 | 8.3  | 6.6  | 1.7  |
| HNRNPA1  | 1 | 60.1 | 53.6 | 6.5  | 47.1 |
| ACVR1B   | 4 | 14.2 | 4.1  | 10.0 | -5.9 |
| OS9      | 0 | 8.1  | 4.0  | 4.1  | -0.2 |
| LTV1     | 1 | 57.2 | 49.4 | 7.9  | 41.5 |
| CD164    | 1 | 79.5 | 75.9 | 3.6  | 72.3 |
| NHSL1    | 4 | 12.7 | 4.1  | 8.7  | -4.6 |

|           |   |      |      |      |       |
|-----------|---|------|------|------|-------|
| AHI1      | 1 | 20.1 | 16.4 | 3.7  | 12.7  |
| PKIB      | 4 | 10.3 | 4.2  | 6.1  | -1.9  |
| SMPD2     | 2 | 22.7 | 10.9 | 11.8 | -0.9  |
| MICAL1    | 0 | 13.0 | 5.0  | 8.0  | -3.0  |
| REPS1     | 6 | 14.6 | 2.7  | 11.9 | -9.2  |
| PRADC1    | 2 | 24.1 | 10.2 | 13.9 | -3.7  |
| SEMA4F    | 0 | 15.2 | 6.4  | 8.7  | -2.3  |
| CCT7      | 5 | 19.4 | 2.6  | 16.8 | -14.2 |
| RAB11FIP5 | 3 | 12.5 | 6.2  | 6.3  | -0.1  |
| SMYD5     | 0 | 10.6 | 4.2  | 6.4  | -2.3  |
| CCDC142   | 4 | 18.6 | 3.7  | 14.9 | -11.2 |
| USP15     | 1 | 65.9 | 59.4 | 6.5  | 52.9  |
| GNS       | 0 | 9.6  | 4.6  | 5.0  | -0.5  |
| CPM       | 0 | 7.1  | 2.4  | 4.7  | -2.3  |
| MDM2      | 1 | 51.9 | 47.6 | 4.3  | 43.2  |
| KLHL36    | 3 | 12.5 | 3.6  | 8.9  | -5.2  |
| MPHOSPH6  | 1 | 21.1 | 13.3 | 7.8  | 5.6   |
| DYNC1LI2  | 1 | 61.6 | 56.5 | 5.0  | 51.5  |
| FBXL8     | 2 | 20.3 | 8.9  | 11.4 | -2.6  |
| FHOD1     | 3 | 10.2 | 3.2  | 7.0  | -3.9  |
| AGT       | 4 | 22.0 | 12.7 | 9.3  | 3.4   |
| PCNXL2    | 3 | 7.9  | 2.4  | 5.5  | -3.1  |
| URB2      | 2 | 20.9 | 7.2  | 13.6 | -6.4  |
| EGLN1     | 0 | 6.7  | 1.7  | 4.9  | -3.2  |
| COG2      | 4 | 10.5 | 2.9  | 7.6  | -4.7  |
| ABCB10    | 1 | 15.8 | 8.8  | 7.0  | 1.8   |
| NTPCR     | 0 | 10.9 | 3.8  | 7.2  | -3.4  |
| TAF5L     | 9 | 8.2  | 0.8  | 7.5  | -6.7  |
| GLUL      | 4 | 8.2  | 2.0  | 6.2  | -4.2  |
| STX6      | 0 | 6.1  | 2.2  | 3.9  | -1.7  |
| DHX9      | 1 | 87.2 | 79.8 | 7.4  | 72.4  |
| CEP350    | 1 | 30.6 | 26.3 | 4.4  | 21.9  |
| PIGC      | 9 | 7.8  | 1.1  | 6.7  | -5.6  |
| LAMC1     | 1 | 16.4 | 11.8 | 4.6  | 7.2   |
| SP110     | 3 | 7.7  | 2.9  | 4.9  | -2.0  |
| MRPL44    | 4 | 15.6 | 3.5  | 12.0 | -8.5  |
| DOCK10    | 1 | 11.8 | 5.7  | 6.1  | -0.4  |
| TTLL4     | 0 | 10.9 | 4.1  | 6.9  | -2.8  |
| ITM2C     | 0 | 7.8  | 4.2  | 3.6  | 0.6   |
| SERPINE2  | 0 | 6.9  | 2.7  | 4.2  | -1.5  |
| DNAJB2    | 3 | 8.3  | 2.6  | 5.7  | -3.1  |
| TMBIM1    | 4 | 13.0 | 3.9  | 9.1  | -5.1  |
| CYP27A1   | 0 | 7.0  | 2.6  | 4.4  | -1.7  |
| EIF4E2    | 6 | 29.6 | 10.0 | 19.6 | -9.7  |
| ARMC9     | 3 | 13.0 | 5.0  | 8.0  | -3.0  |
| CAB39     | 1 | 26.1 | 22.0 | 4.1  | 17.9  |
| COX5B     | 2 | 18.3 | 7.4  | 10.9 | -3.5  |
| REV1      | 1 | 60.7 | 53.4 | 7.3  | 46.1  |
| MFSD9     | 4 | 15.2 | 4.1  | 11.1 | -7.0  |
| TMEM127   | 0 | 14.4 | 6.7  | 7.7  | -1.0  |
| TGFBRAP1  | 0 | 11.3 | 4.9  | 6.4  | -1.5  |
| GCC2      | 1 | 31.7 | 28.8 | 3.0  | 25.8  |
| MRPS9     | 1 | 25.9 | 15.6 | 10.3 | 5.4   |
| C2orf49   | 0 | 11.0 | 3.8  | 7.1  | -3.3  |



|          |    |       |       |      |       |
|----------|----|-------|-------|------|-------|
| EPC2     | 1  | 21.2  | 17.4  | 3.9  | 13.5  |
| ISCU     | 0  | 5.5   | 2.6   | 3.0  | -0.4  |
| SCYL2    | 1  | 58.8  | 54.5  | 4.3  | 50.2  |
| CKAP4    | 0  | 8.1   | 4.6   | 3.5  | 1.0   |
| APPL2    | 1  | 14.0  | 10.7  | 3.3  | 7.4   |
| PWP1     | 1  | 17.2  | 10.8  | 6.4  | 4.4   |
| DRAM1    | 0  | 6.0   | 2.3   | 3.7  | -1.3  |
| KIAA1033 | 1  | 71.8  | 65.8  | 6.1  | 59.7  |
| SLC41A2  | 0  | 10.0  | 2.5   | 7.4  | -4.9  |
| FLNB     | 3  | 10.0  | 3.8   | 6.1  | -2.3  |
| NEK3     | 1  | 15.6  | 9.2   | 6.4  | 2.8   |
| VPS36    | 1  | 28.8  | 23.9  | 4.8  | 19.1  |
| RNASEH2B | 7  | 25.5  | 3.8   | 21.7 | -18.0 |
| CKAP2    | 7  | 39.7  | 7.1   | 32.5 | -25.4 |
| TBC1D4   | 1  | 6.6   | 3.5   | 3.1  | 0.3   |
| BORA     | 7  | 20.9  | 3.2   | 17.7 | -14.6 |
| LRCH1    | 0  | 7.9   | 2.5   | 5.4  | -2.9  |
| SUCLA2   | 1  | 47.2  | 40.1  | 7.0  | 33.1  |
| RCBTB1   | 1  | 9.4   | 6.1   | 3.3  | 2.8   |
| MED4     | 1  | 14.1  | 10.5  | 3.6  | 6.9   |
| PHF11    | 0  | 7.1   | 2.7   | 4.4  | -1.7  |
| COG3     | 0  | 10.0  | 3.7   | 6.4  | -2.7  |
| LMO7     | 1  | 16.7  | 13.8  | 2.9  | 10.8  |
| ITM2B    | 1  | 6.2   | 3.3   | 2.9  | 0.5   |
| SPRY2    | 8  | 8.3   | 1.4   | 6.9  | -5.5  |
| NUDT15   | 7  | 16.9  | 1.8   | 15.1 | -13.3 |
| LCP1     | 0  | 5.7   | 1.5   | 4.2  | -2.7  |
| SCRN1    | 0  | 5.2   | 1.9   | 3.3  | -1.4  |
| TNS3     | 3  | 12.9  | 6.4   | 6.5  | 0.0   |
| CHST12   | 11 | 25.3  | 2.0   | 23.3 | -21.4 |
| IGF2BP3  | 1  | 33.9  | 28.0  | 5.9  | 22.0  |
| GPNMB    | 0  | 7.0   | 2.9   | 4.1  | -1.2  |
| RAC1     | 0  | 8.8   | 3.8   | 5.0  | -1.3  |
| KDELR2   | 1  | 6.6   | 3.4   | 3.2  | 0.1   |
| NUPL2    | 1  | 31.6  | 24.0  | 7.6  | 16.4  |
| ZDHHC4   | 0  | 10.0  | 3.9   | 6.2  | -2.3  |
| BZW2     | 6  | 12.4  | 2.2   | 10.2 | -7.9  |
| TBRG4    | 2  | 26.1  | 9.4   | 16.7 | -7.3  |
| DDX56    | 2  | 17.3  | 6.1   | 11.2 | -5.1  |
| HUS1     | 0  | 7.0   | 3.0   | 4.0  | -1.0  |
| DBNL     | 0  | 13.3  | 5.1   | 8.2  | -3.0  |
| CCM2     | 0  | 20.4  | 7.0   | 13.4 | -6.5  |
| TTYH3    | 3  | 18.5  | 8.2   | 10.3 | -2.0  |
| CIDEB    | 4  | 11.1  | 2.8   | 8.3  | -5.5  |
| TTC5     | 2  | 11.6  | 4.0   | 7.6  | -3.6  |
| MTHFS    | 4  | 20.5  | 9.0   | 11.4 | -2.4  |
| ABHD17C  | 0  | 7.7   | 3.0   | 4.7  | -1.7  |
| IREB2    | 1  | 46.7  | 41.6  | 5.1  | 36.5  |
| CIB2     | 0  | 5.9   | 2.8   | 3.0  | -0.2  |
| CALCOCO2 | 1  | 7.9   | 5.0   | 2.9  | 2.1   |
| RSAD1    | 0  | 8.5   | 3.8   | 4.8  | -1.0  |
| NMT1     | 6  | 27.8  | 7.1   | 20.7 | -13.5 |
| SRSF1    | 1  | 113.7 | 104.8 | 8.9  | 95.9  |
| VEZF1    | 1  | 21.6  | 15.7  | 5.9  | 9.7   |

|           |    |       |       |      |       |
|-----------|----|-------|-------|------|-------|
| TAC01     | 2  | 28.3  | 11.4  | 16.8 | -5.4  |
| TEX2      | 0  | 7.2   | 3.1   | 4.1  | -1.0  |
| DCAF7     | 0  | 12.9  | 6.1   | 6.7  | -0.6  |
| LIMD2     | 0  | 9.8   | 5.0   | 4.8  | 0.3   |
| KAT7      | 0  | 10.0  | 4.4   | 5.7  | -1.3  |
| ACTL6A    | 1  | 43.4  | 35.8  | 7.6  | 28.1  |
| NDUFB5    | 1  | 13.5  | 9.0   | 4.5  | 4.5   |
| MRPL47    | 1  | 38.3  | 32.7  | 5.6  | 27.2  |
| TRA2B     | 1  | 94.7  | 83.5  | 11.2 | 72.2  |
| 7-Mar     | 1  | 112.9 | 107.7 | 5.2  | 102.5 |
| TANK      | 1  | 46.7  | 43.5  | 3.3  | 40.2  |
| GATA4     | 4  | 25.2  | 7.7   | 17.5 | -9.8  |
| SKIL      | 1  | 22.2  | 18.7  | 3.5  | 15.2  |
| EPRS      | 1  | 106.0 | 100.1 | 5.9  | 94.2  |
| VPS45     | 1  | 28.1  | 23.0  | 5.2  | 17.8  |
| KCTD3     | 1  | 21.8  | 18.0  | 3.8  | 14.2  |
| RPS6KC1   | 1  | 10.7  | 8.2   | 2.5  | 5.7   |
| CBWD2     | 0  | 5.6   | 2.2   | 3.5  | -1.3  |
| SMPD4     | 0  | 11.7  | 5.2   | 6.5  | -1.4  |
| WDR33     | 1  | 25.1  | 18.5  | 6.6  | 12.0  |
| CCDC115   | 0  | 10.6  | 4.9   | 5.7  | -0.8  |
| SAP130    | 0  | 11.7  | 4.6   | 7.0  | -2.4  |
| BIN1      | 0  | 5.4   | 2.4   | 3.0  | -0.6  |
| IMP4      | 0  | 13.6  | 5.5   | 8.1  | -2.6  |
| HS6ST1    | 0  | 12.9  | 5.9   | 7.0  | -1.1  |
| UGGT1     | 1  | 15.1  | 11.8  | 3.3  | 8.4   |
| STAM      | 1  | 23.6  | 15.7  | 7.9  | 7.9   |
| ABI1      | 1  | 18.1  | 14.7  | 3.4  | 11.2  |
| YME1L1    | 1  | 92.2  | 87.9  | 4.2  | 83.7  |
| DNAJC1    | 0  | 6.3   | 2.5   | 3.8  | -1.3  |
| NIPSNAP3A | 0  | 7.4   | 2.3   | 5.1  | -2.8  |
| LRRC8A    | 10 | 20.9  | 2.2   | 18.7 | -16.5 |
| CDK9      | 10 | 8.5   | 2.0   | 6.5  | -4.6  |
| TXN       | 0  | 8.9   | 2.7   | 6.3  | -3.6  |
| ODF2      | 10 | 11.2  | 2.2   | 9.0  | -6.8  |
| KIAA0368  | 1  | 38.2  | 30.7  | 7.4  | 23.3  |
| TOR1B     | 10 | 13.1  | 2.0   | 11.1 | -9.0  |
| C9orf78   | 1  | 23.2  | 17.1  | 6.0  | 11.1  |
| SMC2      | 7  | 46.1  | 8.7   | 37.4 | -28.7 |
| TOR1A     | 10 | 10.1  | 2.7   | 7.4  | -4.7  |
| FAM129B   | 3  | 28.9  | 20.4  | 8.5  | 11.9  |
| ST6GALNAC | 0  | 12.4  | 4.8   | 7.7  | -2.9  |
| DAB2IP    | 2  | 16.9  | 4.6   | 12.3 | -7.7  |
| STXBP1    | 0  | 9.9   | 4.4   | 5.5  | -1.1  |
| SLC2A8    | 10 | 10.7  | 1.1   | 9.6  | -8.6  |
| CDK5RAP2  | 1  | 7.3   | 4.8   | 2.5  | 2.3   |
| SLC31A1   | 0  | 12.6  | 4.9   | 7.7  | -2.9  |
| ZNF189    | 1  | 17.4  | 12.1  | 5.3  | 6.8   |
| STX17     | 1  | 10.9  | 7.6   | 3.3  | 4.3   |
| PRPF4     | 10 | 14.4  | 3.8   | 10.6 | -6.8  |
| FPGS      | 10 | 15.4  | 2.8   | 12.6 | -9.8  |
| USP20     | 10 | 29.1  | 3.5   | 25.6 | -22.1 |
| KIF12     | 4  | 10.8  | 4.0   | 6.8  | -2.8  |
| ATP6V1G1  | 1  | 14.1  | 11.1  | 3.1  | 8.0   |

|          |    |      |      |      |       |
|----------|----|------|------|------|-------|
| TEX10    | 1  | 15.9 | 8.7  | 7.2  | 1.5   |
| MRPL50   | 0  | 17.7 | 4.7  | 13.0 | -8.3  |
| DPM2     | 10 | 16.8 | 4.4  | 12.4 | -8.0  |
| TSTD2    | 0  | 10.4 | 3.3  | 7.1  | -3.9  |
| PSMB7    | 10 | 16.3 | 6.3  | 10.0 | -3.7  |
| TRMO     | 10 | 10.9 | 2.1  | 8.8  | -6.7  |
| RABEPK   | 10 | 21.9 | 2.8  | 19.1 | -16.3 |
| GOLGA1   | 0  | 7.2  | 2.2  | 5.0  | -2.8  |
| XPA      | 1  | 9.7  | 4.8  | 5.0  | -0.2  |
| NCBP1    | 1  | 28.4 | 21.9 | 6.5  | 15.4  |
| ANP32B   | 10 | 12.7 | 2.2  | 10.5 | -8.3  |
| PDCL     | 1  | 10.9 | 7.0  | 3.9  | 3.2   |
| RPL35    | 10 | 18.1 | 6.9  | 11.2 | -4.3  |
| CTSV     | 1  | 10.7 | 5.6  | 5.1  | 0.5   |
| ARPC5L   | 10 | 15.7 | 5.5  | 10.2 | -4.8  |
| DSCC1    | 7  | 12.8 | 1.7  | 11.1 | -9.3  |
| DERL1    | 0  | 8.0  | 3.1  | 4.9  | -1.8  |
| MYC      | 0  | 10.3 | 4.1  | 6.2  | -2.1  |
| TMEM261  | 0  | 8.7  | 3.5  | 5.2  | -1.8  |
| RANBP6   | 1  | 15.0 | 11.8 | 3.2  | 8.5   |
| POLR1E   | 0  | 10.0 | 4.0  | 6.0  | -1.9  |
| PLAA     | 1  | 11.5 | 7.9  | 3.6  | 4.3   |
| UBAP2    | 2  | 13.3 | 4.0  | 9.3  | -5.3  |
| APTX     | 0  | 8.2  | 3.3  | 4.9  | -1.6  |
| RNF38    | 0  | 6.6  | 2.8  | 3.8  | -1.1  |
| TLN1     | 3  | 9.7  | 4.2  | 5.5  | -1.4  |
| DNAJB5   | 0  | 12.6 | 6.0  | 6.6  | -0.6  |
| DCTN3    | 10 | 17.8 | 1.1  | 16.7 | -15.6 |
| GRHPR    | 10 | 10.6 | 1.1  | 9.4  | -8.3  |
| ALDH1B1  | 0  | 7.3  | 2.9  | 4.4  | -1.5  |
| HINT2    | 2  | 14.5 | 5.3  | 9.2  | -3.9  |
| ARHGEF39 | 4  | 13.9 | 2.7  | 11.2 | -8.5  |
| DENND4C  | 1  | 14.7 | 12.1 | 2.5  | 9.6   |
| RPS6     | 1  | 10.8 | 6.6  | 4.3  | 2.3   |
| CNPY3    | 0  | 15.2 | 6.2  | 9.0  | -2.8  |
| FOXP4    | 2  | 18.1 | 5.6  | 12.4 | -6.8  |
| PPIL1    | 5  | 14.3 | 2.7  | 11.6 | -8.9  |
| KLC4     | 0  | 10.8 | 4.5  | 6.3  | -1.8  |
| KIF13A   | 1  | 9.3  | 5.4  | 4.0  | 1.4   |
| ZSCAN9   | 0  | 12.1 | 5.3  | 6.8  | -1.6  |
| PIM1     | 0  | 7.9  | 3.3  | 4.6  | -1.3  |
| CMTR1    | 11 | 18.0 | 1.9  | 16.2 | -14.3 |
| TFAP2A   | 0  | 6.8  | 2.4  | 4.3  | -1.9  |
| YIPF3    | 0  | 12.2 | 6.1  | 6.1  | 0.0   |
| TMEM14B  | 0  | 14.2 | 5.2  | 9.0  | -3.8  |
| TMEM63B  | 0  | 12.6 | 5.5  | 7.1  | -1.6  |
| TJAP1    | 0  | 11.9 | 5.0  | 6.9  | -1.9  |
| SLC22A23 | 4  | 13.7 | 6.1  | 7.6  | -1.5  |
| TUBB2A   | 0  | 11.2 | 3.8  | 7.4  | -3.6  |
| LRRC1    | 4  | 15.1 | 6.0  | 9.1  | -3.1  |
| BPHL     | 2  | 14.2 | 5.0  | 9.2  | -4.1  |
| RIPK1    | 0  | 7.6  | 3.5  | 4.1  | -0.5  |
| TUBB2B   | 0  | 8.8  | 4.6  | 4.2  | 0.4   |
| UQCC2    | 0  | 9.2  | 3.5  | 5.7  | -2.2  |

|         |    |       |       |      |       |
|---------|----|-------|-------|------|-------|
| HMGA1   | 0  | 7.2   | 3.0   | 4.2  | -1.2  |
| TCF19   | 5  | 19.6  | 3.3   | 16.3 | -12.9 |
| FLOT1   | 0  | 8.9   | 3.7   | 5.2  | -1.4  |
| IER3    | 3  | 15.4  | 8.0   | 7.4  | 0.6   |
| MDC1    | 0  | 8.3   | 2.2   | 6.1  | -4.0  |
| ATAT1   | 0  | 8.2   | 3.9   | 4.3  | -0.4  |
| TPMT    | 0  | 8.0   | 2.9   | 5.1  | -2.2  |
| NRM     | 3  | 14.5  | 4.8   | 9.7  | -4.9  |
| MTCH1   | 0  | 13.2  | 5.6   | 7.6  | -2.0  |
| VAR52   | 11 | 14.7  | 1.4   | 13.3 | -11.9 |
| TAF8    | 0  | 13.5  | 5.4   | 8.1  | -2.7  |
| FAM8A1  | 4  | 15.7  | 4.3   | 11.4 | -7.1  |
| CPEB2   | 0  | 9.9   | 2.5   | 7.4  | -4.9  |
| FCHSD2  | 0  | 8.1   | 3.5   | 4.6  | -1.2  |
| ARRB1   | 0  | 14.3  | 4.9   | 9.4  | -4.5  |
| PRKRIR  | 1  | 18.8  | 14.2  | 4.6  | 9.6   |
| IL18BP  | 0  | 6.1   | 2.8   | 3.3  | -0.5  |
| NUMA1   | 3  | 12.3  | 3.4   | 8.9  | -5.5  |
| CCDC90B | 1  | 23.3  | 17.9  | 5.4  | 12.6  |
| SYTL2   | 3  | 7.9   | 2.7   | 5.2  | -2.6  |
| RAB30   | 0  | 6.6   | 3.2   | 3.4  | -0.2  |
| CREBZF  | 1  | 26.3  | 23.4  | 2.9  | 20.5  |
| PRCP    | 0  | 9.3   | 3.3   | 5.9  | -2.6  |
| NARS2   | 1  | 20.1  | 11.0  | 9.1  | 1.9   |
| RNF121  | 0  | 7.6   | 3.2   | 4.4  | -1.3  |
| MRPL15  | 7  | 11.4  | 0.9   | 10.4 | -9.5  |
| GGH     | 1  | 31.5  | 26.9  | 4.6  | 22.3  |
| TGS1    | 1  | 23.4  | 18.8  | 4.6  | 14.2  |
| SDCBP   | 1  | 15.0  | 7.0   | 8.0  | -1.1  |
| BUD13   | 2  | 22.7  | 9.2   | 13.5 | -4.3  |
| MMP7    | 3  | 12.0  | 4.2   | 7.9  | -3.7  |
| DCUN1D5 | 0  | 15.2  | 5.4   | 9.8  | -4.3  |
| YAP1    | 1  | 14.2  | 9.9   | 4.3  | 5.5   |
| SLC37A4 | 4  | 19.8  | 4.8   | 15.0 | -10.2 |
| RDX     | 1  | 58.0  | 52.7  | 5.3  | 47.4  |
| PPP2R1B | 1  | 10.6  | 5.8   | 4.8  | 1.1   |
| FDX1    | 2  | 23.1  | 10.9  | 12.2 | -1.3  |
| C11orf1 | 0  | 10.8  | 4.7   | 6.1  | -1.3  |
| MAP2K5  | 0  | 11.4  | 4.2   | 7.2  | -3.0  |
| SQRDL   | 3  | 13.0  | 5.1   | 7.9  | -2.8  |
| CTDSPL2 | 1  | 47.1  | 41.0  | 6.0  | 35.0  |
| SLTM    | 1  | 123.9 | 117.4 | 6.5  | 110.8 |
| THBS1   | 3  | 15.4  | 8.7   | 6.8  | 1.9   |
| MAPKBP1 | 0  | 8.7   | 4.5   | 4.2  | 0.4   |
| NUSAP1  | 5  | 34.4  | 11.5  | 23.0 | -11.5 |
| NDUFAF1 | 0  | 7.6   | 2.8   | 4.9  | -2.1  |
| KIF23   | 7  | 48.4  | 10.9  | 37.4 | -26.5 |
| CASC5   | 1  | 25.9  | 19.8  | 6.1  | 13.7  |
| HAUS2   | 7  | 14.6  | 2.9   | 11.7 | -8.8  |
| RTF1    | 1  | 53.4  | 45.7  | 7.7  | 38.1  |
| PARP6   | 0  | 6.4   | 2.0   | 4.5  | -2.5  |
| RPLP1   | 6  | 14.5  | 6.1   | 8.4  | -2.4  |
| PAQR5   | 0  | 5.6   | 2.3   | 3.2  | -0.9  |
| TUBGCP4 | 0  | 10.0  | 3.3   | 6.7  | -3.5  |

|          |   |       |       |      |       |
|----------|---|-------|-------|------|-------|
| RMDN3    | 4 | 13.8  | 3.9   | 9.9  | -6.0  |
| ITPKA    | 4 | 25.3  | 7.5   | 17.8 | -10.3 |
| UACA     | 1 | 21.7  | 17.5  | 4.2  | 13.4  |
| SMAD6    | 0 | 8.5   | 3.0   | 5.5  | -2.5  |
| TMEM62   | 0 | 9.8   | 3.8   | 6.0  | -2.2  |
| ADAM10   | 1 | 78.0  | 74.2  | 3.8  | 70.4  |
| ZNF280D  | 1 | 8.8   | 5.1   | 3.7  | 1.4   |
| RSL24D1  | 1 | 64.8  | 60.1  | 4.7  | 55.4  |
| GCHFR    | 4 | 37.6  | 20.9  | 16.6 | 4.3   |
| BCAR3    | 3 | 16.7  | 9.8   | 6.8  | 3.0   |
| TTL7     | 1 | 12.0  | 8.6   | 3.4  | 5.2   |
| FNBP1L   | 1 | 23.7  | 20.7  | 3.0  | 17.8  |
| CCBL2    | 1 | 10.9  | 7.4   | 3.5  | 3.9   |
| GTF2B    | 1 | 15.3  | 11.9  | 3.4  | 8.5   |
| RABGGTB  | 1 | 100.8 | 94.0  | 6.8  | 87.1  |
| ARHGAP29 | 1 | 22.2  | 18.1  | 4.1  | 14.0  |
| RTCA     | 1 | 33.0  | 26.1  | 7.0  | 19.1  |
| IFT172   | 0 | 10.3  | 4.9   | 5.4  | -0.5  |
| EPT1     | 1 | 21.0  | 14.9  | 6.2  | 8.7   |
| CGREF1   | 0 | 13.6  | 4.9   | 8.7  | -3.8  |
| HADHB    | 0 | 6.6   | 2.6   | 4.0  | -1.3  |
| KHK      | 4 | 19.1  | 7.8   | 11.4 | -3.6  |
| ADCY3    | 0 | 8.5   | 3.7   | 4.8  | -1.2  |
| PPM1B    | 1 | 29.9  | 26.4  | 3.5  | 23.0  |
| PNPT1    | 1 | 67.2  | 59.8  | 7.4  | 52.4  |
| DYNC2LI1 | 1 | 9.5   | 6.1   | 3.3  | 2.8   |
| THUMP2   | 1 | 19.1  | 14.8  | 4.3  | 10.5  |
| CYP1B1   | 3 | 10.7  | 4.4   | 6.3  | -1.9  |
| RAB1A    | 1 | 96.2  | 91.9  | 4.3  | 87.6  |
| ACTR2    | 1 | 109.5 | 104.6 | 4.9  | 99.7  |
| PREB     | 0 | 14.5  | 5.6   | 8.9  | -3.3  |
| SLC5A6   | 4 | 18.1  | 3.5   | 14.6 | -11.1 |
| PREPL    | 1 | 34.9  | 31.9  | 2.9  | 29.0  |
| FBXO11   | 1 | 42.5  | 39.5  | 3.1  | 36.4  |
| ATRAID   | 0 | 7.0   | 3.8   | 3.3  | 0.5   |
| CENPO    | 5 | 14.9  | 4.8   | 10.1 | -5.3  |
| LRPPRC   | 1 | 84.5  | 78.5  | 6.0  | 72.5  |
| DTNB     | 0 | 8.5   | 4.4   | 4.1  | 0.4   |
| ACTR1A   | 0 | 15.7  | 7.6   | 8.0  | -0.4  |
| MYOF     | 3 | 27.7  | 18.9  | 8.8  | 10.2  |
| LOXL4    | 0 | 7.0   | 3.1   | 3.9  | -0.8  |
| ATAD1    | 1 | 25.2  | 21.2  | 4.1  | 17.1  |
| KIF11    | 7 | 57.7  | 13.5  | 44.3 | -30.8 |
| TACC2    | 0 | 7.9   | 3.1   | 4.8  | -1.7  |
| DUSP5    | 0 | 10.0  | 3.9   | 6.0  | -2.1  |
| ARL3     | 0 | 14.1  | 5.7   | 8.5  | -2.8  |
| CEP55    | 7 | 36.0  | 8.4   | 27.5 | -19.1 |
| KIF20B   | 7 | 34.4  | 7.1   | 27.3 | -20.2 |
| EXOC6    | 1 | 15.9  | 8.9   | 6.9  | 2.0   |
| RBP4     | 4 | 24.3  | 14.7  | 9.6  | 5.1   |
| DBR1     | 0 | 6.6   | 2.7   | 3.9  | -1.1  |
| DNAJC13  | 1 | 39.7  | 35.6  | 4.1  | 31.6  |
| ANXA7    | 6 | 10.1  | 1.2   | 8.8  | -7.6  |
| FAM149B1 | 0 | 9.9   | 3.4   | 6.5  | -3.1  |

|           |   |       |       |      |       |
|-----------|---|-------|-------|------|-------|
| ASCC1     | 1 | 10.3  | 5.1   | 5.2  | -0.2  |
| RPS24     | 1 | 25.4  | 20.4  | 5.0  | 15.3  |
| DNA2      | 7 | 37.8  | 6.7   | 31.0 | -24.3 |
| AOX1      | 3 | 8.7   | 3.8   | 4.9  | -1.1  |
| ATIC      | 5 | 19.9  | 5.3   | 14.7 | -9.4  |
| SMARCAL1  | 0 | 12.3  | 5.8   | 6.5  | -0.7  |
| BARD1     | 7 | 15.0  | 2.1   | 12.9 | -10.8 |
| ASNSD1    | 1 | 77.8  | 70.2  | 7.7  | 62.5  |
| METTL5    | 1 | 44.5  | 37.1  | 7.4  | 29.8  |
| SSB       | 1 | 116.4 | 109.3 | 7.1  | 102.2 |
| NAB1      | 1 | 32.1  | 28.3  | 3.8  | 24.6  |
| PPIG      | 1 | 58.3  | 52.9  | 5.4  | 47.6  |
| FASTKD1   | 1 | 34.9  | 28.9  | 6.0  | 22.9  |
| IDH1      | 4 | 15.3  | 6.5   | 8.8  | -2.3  |
| OLA1      | 1 | 69.9  | 56.4  | 13.5 | 42.9  |
| CIR1      | 1 | 21.7  | 18.0  | 3.6  | 14.4  |
| SSFA2     | 1 | 85.2  | 78.3  | 7.0  | 71.3  |
| WDR12     | 6 | 44.0  | 14.5  | 29.5 | -15.0 |
| ABI2      | 0 | 7.8   | 2.8   | 4.9  | -2.1  |
| ITGAV     | 1 | 44.3  | 39.0  | 5.3  | 33.6  |
| SLC40A1   | 4 | 15.9  | 7.3   | 8.6  | -1.3  |
| SLC35A5   | 1 | 21.7  | 17.3  | 4.4  | 12.9  |
| DIRC2     | 0 | 7.1   | 3.3   | 3.9  | -0.6  |
| COX17     | 0 | 7.1   | 2.9   | 4.2  | -1.3  |
| PARP9     | 0 | 12.3  | 5.1   | 7.2  | -2.1  |
| USP8      | 1 | 48.5  | 45.5  | 3.0  | 42.5  |
| SECISBP2I | 1 | 29.6  | 26.7  | 2.9  | 23.8  |
| TMOD3     | 1 | 25.3  | 22.1  | 3.2  | 18.8  |
| SPPL2A    | 1 | 25.7  | 21.9  | 3.7  | 18.2  |
| GLCE      | 0 | 9.1   | 2.9   | 6.2  | -3.2  |
| APH1B     | 0 | 5.7   | 3.0   | 2.6  | 0.4   |
| VWA9      | 0 | 10.7  | 4.3   | 6.4  | -2.1  |
| PARP16    | 2 | 15.8  | 5.0   | 10.8 | -5.8  |
| PPCDC     | 2 | 15.6  | 5.8   | 9.8  | -4.1  |
| SEMA7A    | 3 | 12.9  | 5.6   | 7.3  | -1.7  |
| UBL7      | 0 | 10.8  | 3.8   | 7.0  | -3.2  |
| HERC3     | 0 | 8.4   | 2.8   | 5.6  | -2.8  |
| AP1AR     | 1 | 22.6  | 17.7  | 4.9  | 12.8  |
| COPS4     | 1 | 20.1  | 16.8  | 3.3  | 13.6  |
| HNRNPD    | 1 | 11.7  | 7.5   | 4.2  | 3.4   |
| SEC31A    | 1 | 14.1  | 11.2  | 3.0  | 8.2   |
| GPAT3     | 0 | 7.3   | 2.9   | 4.3  | -1.4  |
| BBS7      | 1 | 9.9   | 5.3   | 4.6  | 0.8   |
| KIAA1109  | 1 | 26.9  | 23.9  | 2.9  | 21.0  |
| RAP1GDS1  | 0 | 6.1   | 2.6   | 3.5  | -0.8  |
| LARP1B    | 1 | 17.9  | 11.2  | 6.8  | 4.4   |
| NAAA      | 0 | 7.2   | 3.2   | 4.0  | -0.8  |
| NUP54     | 1 | 72.7  | 63.5  | 9.2  | 54.2  |
| BMP2K     | 1 | 9.6   | 6.6   | 3.0  | 3.5   |
| G3BP2     | 1 | 54.4  | 50.8  | 3.6  | 47.3  |
| 11-Sep    | 1 | 71.1  | 64.3  | 6.8  | 57.5  |
| SCARB2    | 0 | 10.7  | 4.7   | 6.0  | -1.2  |
| CCNG2     | 0 | 10.4  | 3.9   | 6.5  | -2.7  |
| CNOT6L    | 1 | 14.8  | 10.6  | 4.2  | 6.4   |

|           |   |      |      |      |       |
|-----------|---|------|------|------|-------|
| USO1      | 1 | 50.9 | 48.1 | 2.8  | 45.3  |
| SHROOM3   | 0 | 6.9  | 2.8  | 4.1  | -1.3  |
| ANXA3     | 1 | 7.7  | 3.8  | 3.8  | 0.0   |
| PPA2      | 0 | 6.8  | 2.6  | 4.2  | -1.5  |
| CENPE     | 7 | 25.0 | 3.3  | 21.7 | -18.4 |
| GSTCD     | 1 | 10.5 | 5.7  | 4.7  | 1.0   |
| INTS12    | 0 | 6.2  | 1.9  | 4.2  | -2.3  |
| CASP6     | 4 | 7.7  | 2.2  | 5.5  | -3.3  |
| HADH      | 0 | 8.8  | 2.9  | 5.9  | -3.0  |
| PAPSS1    | 0 | 10.7 | 4.4  | 6.3  | -1.9  |
| SEC24B    | 1 | 16.4 | 13.9 | 2.4  | 11.5  |
| PPP3CA    | 1 | 12.8 | 6.6  | 6.2  | 0.4   |
| SLC39A8   | 0 | 6.1  | 1.7  | 4.4  | -2.7  |
| MAPK8IP3  | 0 | 8.4  | 4.0  | 4.4  | -0.4  |
| RGS3      | 3 | 11.4 | 5.9  | 5.5  | 0.4   |
| GUCD1     | 0 | 9.3  | 3.8  | 5.5  | -1.7  |
| RNF185    | 2 | 16.7 | 6.0  | 10.7 | -4.6  |
| GABARAPL1 | 0 | 5.8  | 2.2  | 3.6  | -1.3  |
| KIF21A    | 1 | 34.5 | 27.1 | 7.4  | 19.6  |
| CPNE8     | 1 | 19.2 | 14.5 | 4.6  | 9.9   |
| YARS2     | 1 | 23.5 | 12.5 | 11.1 | 1.4   |
| FAM60A    | 1 | 27.3 | 21.3 | 6.0  | 15.4  |
| AEBP2     | 1 | 30.1 | 26.1 | 4.0  | 22.0  |
| ETNK1     | 1 | 21.6 | 15.7 | 5.9  | 9.8   |
| ZCRB1     | 1 | 53.9 | 46.9 | 7.0  | 39.9  |
| C1RL      | 0 | 11.8 | 5.6  | 6.3  | -0.7  |
| NDUFA9    | 0 | 9.9  | 3.5  | 6.4  | -2.9  |
| CLSTN3    | 0 | 9.3  | 3.8  | 5.6  | -1.8  |
| VAMP1     | 0 | 7.0  | 3.2  | 3.8  | -0.6  |
| TAPBPL    | 0 | 9.9  | 4.0  | 5.8  | -1.8  |
| PEX5      | 2 | 15.0 | 4.1  | 10.9 | -6.8  |
| AMIGO2    | 1 | 16.9 | 9.7  | 7.2  | 2.5   |
| SCAF11    | 1 | 96.5 | 89.1 | 7.4  | 81.7  |
| LLPH      | 1 | 56.8 | 49.1 | 7.7  | 41.3  |
| LRIG3     | 0 | 6.1  | 2.2  | 3.9  | -1.7  |
| 9-Mar     | 0 | 11.8 | 5.1  | 6.7  | -1.5  |
| GLIPR1    | 3 | 16.5 | 8.4  | 8.1  | 0.3   |
| PHLDA1    | 0 | 9.8  | 4.2  | 5.6  | -1.4  |
| TMEM19    | 7 | 14.5 | 1.5  | 13.0 | -11.5 |
| DUSP6     | 4 | 12.6 | 3.8  | 8.8  | -5.0  |
| POC1B     | 0 | 12.3 | 3.2  | 9.1  | -5.9  |
| LUM       | 0 | 5.6  | 2.1  | 3.5  | -1.4  |
| SNRPF     | 5 | 26.7 | 6.7  | 20.0 | -13.3 |
| NEDD1     | 7 | 45.4 | 6.7  | 38.7 | -32.0 |
| GAS2L3    | 1 | 16.9 | 11.5 | 5.4  | 6.1   |
| SLC15A4   | 0 | 5.9  | 2.0  | 3.9  | -1.9  |
| TDG       | 1 | 33.8 | 29.1 | 4.7  | 24.4  |
| RITA1     | 2 | 22.6 | 9.2  | 13.4 | -4.2  |
| SDSL      | 4 | 20.9 | 5.4  | 15.5 | -10.1 |
| MMAB      | 2 | 16.2 | 5.1  | 11.2 | -6.1  |
| GLTP      | 3 | 9.0  | 2.7  | 6.3  | -3.6  |
| GIT2      | 0 | 8.8  | 4.0  | 4.8  | -0.8  |
| TCHP      | 0 | 6.7  | 2.9  | 3.9  | -1.0  |
| NUP58     | 1 | 21.3 | 16.0 | 5.3  | 10.7  |

|          |   |      |      |      |       |
|----------|---|------|------|------|-------|
| MTMR6    | 1 | 10.6 | 7.2  | 3.4  | 3.7   |
| SLC7A1   | 0 | 8.7  | 3.4  | 5.3  | -1.9  |
| SUOX     | 4 | 23.6 | 7.0  | 16.6 | -9.5  |
| TARBP2   | 0 | 15.8 | 6.3  | 9.5  | -3.1  |
| NABP2    | 0 | 11.2 | 4.0  | 7.2  | -3.1  |
| SMARCC2  | 0 | 10.4 | 4.6  | 5.8  | -1.2  |
| KANSL2   | 0 | 10.1 | 4.6  | 5.5  | -0.9  |
| CERS5    | 6 | 12.8 | 2.3  | 10.5 | -8.1  |
| MAP3K12  | 0 | 9.6  | 4.3  | 5.3  | -1.1  |
| CSAD     | 0 | 9.4  | 3.8  | 5.6  | -1.8  |
| LMBR1L   | 0 | 7.8  | 4.3  | 3.6  | 0.7   |
| C12orf10 | 0 | 14.8 | 6.1  | 8.7  | -2.6  |
| ESYT1    | 0 | 11.3 | 3.9  | 7.4  | -3.5  |
| TMBIM6   | 0 | 9.2  | 3.2  | 6.0  | -2.8  |
| ANKRD52  | 0 | 10.7 | 4.5  | 6.2  | -1.6  |
| ZNF740   | 1 | 16.0 | 9.5  | 6.5  | 3.0   |
| ESD      | 1 | 16.6 | 11.7 | 4.9  | 6.8   |
| RB1      | 1 | 13.5 | 10.6 | 2.9  | 7.7   |
| SBNO1    | 1 | 34.5 | 29.8 | 4.7  | 25.0  |
| SETD1B   | 2 | 21.1 | 7.8  | 13.3 | -5.5  |
| VPS33A   | 0 | 9.9  | 3.8  | 6.1  | -2.4  |
| VPS37B   | 0 | 17.9 | 6.0  | 12.0 | -6.0  |
| RHOF     | 4 | 13.4 | 4.0  | 9.3  | -5.3  |
| DENR     | 1 | 37.0 | 32.2 | 4.8  | 27.4  |
| DIAPH3   | 7 | 18.1 | 3.2  | 15.0 | -11.8 |
| RBM26    | 1 | 34.6 | 30.2 | 4.4  | 25.8  |
| MBNL2    | 1 | 18.1 | 13.0 | 5.2  | 7.8   |
| RAB20    | 0 | 17.2 | 5.7  | 11.6 | -5.9  |
| CUL4A    | 0 | 10.4 | 3.3  | 7.1  | -3.8  |
| CDH24    | 2 | 15.8 | 4.8  | 11.0 | -6.1  |
| TMX1     | 1 | 71.2 | 64.8 | 6.5  | 58.3  |
| FRMD6    | 3 | 26.6 | 12.5 | 14.1 | -1.6  |
| SLC38A6  | 1 | 13.4 | 8.2  | 5.2  | 3.0   |
| NAA30    | 1 | 19.0 | 15.5 | 3.5  | 11.9  |
| DCAF5    | 0 | 10.9 | 6.2  | 4.6  | 1.6   |
| RAB15    | 0 | 6.6  | 2.7  | 3.8  | -1.1  |
| WDR89    | 1 | 21.3 | 14.9 | 6.4  | 8.5   |
| EFCAB11  | 0 | 10.8 | 3.3  | 7.6  | -4.3  |
| PTGR2    | 1 | 9.0  | 6.5  | 2.6  | 3.9   |
| JDP2     | 0 | 6.3  | 3.0  | 3.2  | -0.2  |
| C14orf79 | 2 | 17.9 | 7.3  | 10.6 | -3.3  |
| WARS     | 0 | 7.2  | 3.8  | 3.4  | 0.4   |
| WDR20    | 0 | 8.9  | 3.7  | 5.2  | -1.5  |
| NIPA2    | 1 | 17.0 | 11.8 | 5.2  | 6.7   |
| MFAP1    | 1 | 30.4 | 26.3 | 4.1  | 22.2  |
| TCF12    | 1 | 58.3 | 53.8 | 4.6  | 49.2  |
| SORD     | 4 | 19.1 | 7.0  | 12.1 | -5.2  |
| SERF2    | 0 | 8.4  | 2.9  | 5.6  | -2.7  |
| ZSCAN29  | 0 | 12.4 | 3.7  | 8.6  | -4.9  |
| LYSMD2   | 0 | 7.1  | 3.1  | 4.0  | -0.9  |
| GCNT3    | 4 | 18.1 | 5.6  | 12.5 | -7.0  |
| BNIP2    | 1 | 53.1 | 50.3 | 2.8  | 47.5  |
| GTF2A2   | 1 | 85.7 | 76.2 | 9.6  | 66.6  |
| SRP14    | 1 | 15.2 | 11.9 | 3.3  | 8.6   |



|          |    |      |      |      |       |
|----------|----|------|------|------|-------|
| BAHD1    | 2  | 32.8 | 15.5 | 17.3 | -1.8  |
| CDAN1    | 2  | 15.5 | 5.9  | 9.6  | -3.6  |
| TLE3     | 0  | 6.3  | 2.5  | 3.7  | -1.2  |
| ANP32A   | 1  | 22.6 | 17.6 | 5.1  | 12.5  |
| COMMD4   | 5  | 14.4 | 2.5  | 11.8 | -9.3  |
| UBE2Q2   | 1  | 26.2 | 22.7 | 3.5  | 19.3  |
| ETFA     | 1  | 25.0 | 18.4 | 6.6  | 11.7  |
| HMG20A   | 1  | 16.2 | 10.3 | 5.9  | 4.4   |
| TSPAN3   | 0  | 11.9 | 4.9  | 7.1  | -2.2  |
| WDR61    | 1  | 8.3  | 4.4  | 3.9  | 0.5   |
| NCOA2    | 1  | 16.2 | 10.8 | 5.4  | 5.5   |
| MAN2C1   | 0  | 7.9  | 3.1  | 4.8  | -1.7  |
| MESDC1   | 2  | 40.6 | 22.0 | 18.6 | 3.4   |
| TPM1     | 3  | 18.9 | 12.9 | 6.0  | 6.9   |
| IGF1R    | 1  | 11.4 | 5.8  | 5.6  | 0.2   |
| PIF1     | 0  | 10.0 | 3.6  | 6.4  | -2.9  |
| USP3     | 4  | 10.4 | 2.8  | 7.7  | -4.9  |
| BBS4     | 1  | 12.5 | 9.2  | 3.3  | 5.9   |
| PML      | 3  | 21.8 | 13.0 | 8.8  | 4.2   |
| LINS1    | 1  | 16.2 | 11.3 | 4.9  | 6.4   |
| ULK3     | 2  | 11.1 | 3.4  | 7.7  | -4.3  |
| PCSK6    | 4  | 21.0 | 12.0 | 9.0  | 3.0   |
| SCAMP2   | 4  | 11.4 | 4.0  | 7.4  | -3.4  |
| POLG     | 0  | 7.2  | 2.7  | 4.5  | -1.8  |
| FANCI    | 7  | 32.1 | 5.4  | 26.7 | -21.3 |
| ABHD2    | 0  | 13.4 | 5.0  | 8.5  | -3.5  |
| TICRR    | 0  | 12.2 | 5.1  | 7.1  | -2.0  |
| MFGE8    | 3  | 12.3 | 6.2  | 6.1  | 0.1   |
| ZNF710   | 2  | 25.2 | 8.4  | 16.8 | -8.5  |
| UNC45A   | 0  | 11.2 | 4.5  | 6.7  | -2.2  |
| FURIN    | 0  | 9.4  | 4.2  | 5.1  | -0.9  |
| IQGAP1   | 1  | 57.6 | 49.3 | 8.3  | 41.0  |
| CRTC3    | 0  | 9.0  | 4.5  | 4.5  | 0.0   |
| EFTUD1   | 1  | 11.1 | 8.2  | 2.9  | 5.3   |
| SEC11A   | 1  | 20.6 | 17.3 | 3.3  | 14.0  |
| GLYR1    | 0  | 9.4  | 3.2  | 6.2  | -3.0  |
| PMM2     | 12 | 10.0 | 1.3  | 8.7  | -7.4  |
| TGFB1I1  | 3  | 15.9 | 5.9  | 10.0 | -4.1  |
| C16orf58 | 11 | 18.1 | 2.4  | 15.6 | -13.2 |
| ARMC5    | 11 | 31.5 | 2.8  | 28.7 | -25.9 |
| PARN     | 1  | 13.0 | 9.7  | 3.3  | 6.4   |
| FTO      | 0  | 9.8  | 4.9  | 4.9  | -0.1  |
| UQCRC2   | 1  | 52.0 | 47.5 | 4.5  | 43.1  |
| CDR2     | 1  | 7.6  | 4.2  | 3.3  | 0.9   |
| ARHGAP17 | 0  | 5.5  | 1.9  | 3.7  | -1.8  |
| DHX38    | 0  | 10.9 | 5.5  | 5.3  | 0.2   |
| TXNL4B   | 0  | 14.6 | 6.3  | 8.3  | -1.9  |
| CPNE2    | 3  | 11.1 | 3.4  | 7.8  | -4.4  |
| NLRC5    | 3  | 13.9 | 6.4  | 7.5  | -1.1  |
| KATNB1   | 2  | 18.0 | 7.4  | 10.6 | -3.1  |
| KIFC3    | 3  | 14.5 | 7.3  | 7.2  | 0.1   |
| GCSH     | 6  | 38.5 | 8.7  | 29.8 | -21.0 |
| CMTM3    | 0  | 8.9  | 4.4  | 4.5  | -0.1  |
| NOL3     | 0  | 13.4 | 5.5  | 7.9  | -2.4  |

|          |    |      |      |      |       |
|----------|----|------|------|------|-------|
| MAP1LC3B | 0  | 7.9  | 3.6  | 4.3  | -0.7  |
| MBTPS1   | 0  | 9.3  | 4.1  | 5.1  | -1.0  |
| ZCCHC14  | 0  | 8.1  | 4.0  | 4.1  | -0.1  |
| TLDC1    | 3  | 13.0 | 6.1  | 7.0  | -0.9  |
| OSGIN1   | 4  | 17.2 | 4.8  | 12.4 | -7.6  |
| RHOT2    | 12 | 10.9 | 2.5  | 8.3  | -5.8  |
| ZSCAN32  | 0  | 6.9  | 2.8  | 4.2  | -1.4  |
| RPS2     | 12 | 11.5 | 2.0  | 9.5  | -7.5  |
| NDUFB10  | 12 | 9.7  | 2.8  | 6.9  | -4.2  |
| PDPK1    | 0  | 8.3  | 3.1  | 5.2  | -2.2  |
| DEF8     | 0  | 9.5  | 4.8  | 4.6  | 0.2   |
| TCF25    | 6  | 11.1 | 1.9  | 9.2  | -7.3  |
| GALNS    | 0  | 10.4 | 5.9  | 4.5  | 1.4   |
| GAS8     | 0  | 7.0  | 3.2  | 3.7  | -0.5  |
| MED9     | 2  | 20.6 | 8.5  | 12.0 | -3.5  |
| NCOR1    | 1  | 28.2 | 25.3 | 2.9  | 22.4  |
| COPS3    | 1  | 17.3 | 11.8 | 5.5  | 6.3   |
| GID4     | 0  | 11.4 | 4.1  | 7.2  | -3.1  |
| KSR1     | 0  | 6.4  | 2.8  | 3.5  | -0.7  |
| UTP4     | 0  | 16.0 | 6.7  | 9.3  | -2.5  |
| RANBP10  | 2  | 29.9 | 14.7 | 15.2 | -0.5  |
| CTRL     | 6  | 8.1  | 1.8  | 6.3  | -4.4  |
| GFOD2    | 2  | 30.0 | 15.1 | 14.9 | 0.2   |
| NOB1     | 0  | 20.1 | 8.5  | 11.6 | -3.0  |
| PRPSAP2  | 6  | 20.5 | 2.9  | 17.7 | -14.8 |
| PCTP     | 4  | 15.1 | 5.7  | 9.4  | -3.7  |
| TOM1L1   | 1  | 9.5  | 4.1  | 5.4  | -1.3  |
| C17orf80 | 1  | 17.1 | 13.1 | 4.0  | 9.2   |
| TOB1     | 4  | 16.8 | 7.3  | 9.5  | -2.2  |
| VPS53    | 6  | 9.2  | 1.5  | 7.7  | -6.2  |
| SGSM2    | 0  | 6.9  | 2.7  | 4.2  | -1.4  |
| NPEPPS   | 1  | 7.0  | 3.4  | 3.7  | -0.3  |
| SCRN2    | 2  | 12.5 | 4.7  | 7.8  | -3.1  |
| SSH2     | 0  | 10.0 | 3.8  | 6.2  | -2.4  |
| G6PC3    | 0  | 9.5  | 3.6  | 5.9  | -2.3  |
| CLTC     | 1  | 92.7 | 87.8 | 4.9  | 82.9  |
| BCAS3    | 0  | 7.2  | 3.8  | 3.4  | 0.4   |
| PTRH2    | 1  | 39.1 | 32.5 | 6.6  | 25.9  |
| SS18     | 1  | 69.8 | 63.7 | 6.1  | 57.5  |
| AFG3L2   | 0  | 6.2  | 2.5  | 3.7  | -1.2  |
| IMPA2    | 0  | 9.4  | 3.6  | 5.8  | -2.3  |
| SLC39A6  | 1  | 20.9 | 16.0 | 4.8  | 11.2  |
| RPRD1A   | 1  | 14.2 | 10.3 | 3.8  | 6.5   |
| C18orf21 | 1  | 11.2 | 7.9  | 3.3  | 4.5   |
| GALNT1   | 1  | 15.8 | 12.3 | 3.5  | 8.8   |
| ESCO1    | 1  | 24.5 | 19.8 | 4.7  | 15.1  |
| OSBPL1A  | 0  | 5.9  | 2.6  | 3.3  | -0.8  |
| C18orf8  | 0  | 6.5  | 2.7  | 3.8  | -1.0  |
| PELP1    | 0  | 16.5 | 5.9  | 10.6 | -4.6  |
| NPC1     | 0  | 6.6  | 2.7  | 3.9  | -1.3  |
| ARRB2    | 4  | 13.4 | 2.9  | 10.5 | -7.6  |
| WRAP53   | 2  | 23.5 | 8.3  | 15.2 | -6.9  |
| MINK1    | 0  | 12.5 | 5.4  | 7.1  | -1.7  |
| SAT2     | 0  | 7.0  | 3.3  | 3.7  | -0.4  |

|         |   |      |      |      |       |
|---------|---|------|------|------|-------|
| TP53    | 0 | 5.9  | 2.5  | 3.4  | -0.8  |
| ARHGDIA | 0 | 10.0 | 3.6  | 6.3  | -2.7  |
| TMC6    | 4 | 16.4 | 6.8  | 9.5  | -2.7  |
| SLC16A3 | 0 | 7.8  | 3.5  | 4.3  | -0.9  |
| TTYH2   | 0 | 12.2 | 5.1  | 7.2  | -2.1  |
| RAB40B  | 0 | 8.3  | 3.2  | 5.1  | -1.9  |
| EIF4A3  | 5 | 16.2 | 3.3  | 13.0 | -9.7  |
| CSNK1D  | 0 | 7.2  | 3.8  | 3.4  | 0.3   |
| ANAPC11 | 0 | 12.3 | 4.5  | 7.9  | -3.4  |
| TBCD    | 0 | 11.0 | 4.5  | 6.5  | -2.0  |
| FN3KRP  | 5 | 9.8  | 2.1  | 7.7  | -5.6  |
| NARF    | 0 | 6.2  | 3.2  | 3.0  | 0.1   |
| RPTOR   | 0 | 14.9 | 6.4  | 8.5  | -2.1  |
| FOXK2   | 0 | 9.9  | 4.9  | 5.1  | -0.2  |
| TRIM65  | 2 | 14.2 | 5.2  | 9.0  | -3.7  |
| CBX8    | 2 | 19.0 | 7.6  | 11.3 | -3.7  |
| RNF157  | 0 | 4.9  | 2.3  | 2.7  | -0.4  |
| CEP131  | 2 | 18.4 | 6.8  | 11.6 | -4.8  |
| WDR45B  | 0 | 6.0  | 2.5  | 3.6  | -1.1  |
| CBX4    | 4 | 18.6 | 5.5  | 13.1 | -7.6  |
| DYM     | 0 | 4.9  | 2.0  | 2.9  | -0.9  |
| ELAC1   | 2 | 13.5 | 4.3  | 9.1  | -4.8  |
| MBD1    | 0 | 14.8 | 6.2  | 8.6  | -2.4  |
| SMAD4   | 1 | 13.2 | 10.0 | 3.2  | 6.8   |
| ZCCHC2  | 4 | 6.2  | 1.8  | 4.4  | -2.6  |
| PMAIP1  | 3 | 8.1  | 3.1  | 4.9  | -1.8  |
| P3H4    | 0 | 7.3  | 3.9  | 3.4  | 0.5   |
| NT5C3B  | 0 | 5.7  | 2.8  | 2.9  | -0.1  |
| FAM134C | 0 | 17.5 | 6.8  | 10.7 | -3.9  |
| ERBB2   | 0 | 6.3  | 2.6  | 3.7  | -1.0  |
| GRB7    | 4 | 15.6 | 5.1  | 10.5 | -5.4  |
| MIEN1   | 0 | 12.1 | 5.0  | 7.1  | -2.1  |
| IGFBP4  | 3 | 14.8 | 7.9  | 6.9  | 1.0   |
| FKBP10  | 1 | 10.5 | 6.5  | 4.0  | 2.5   |
| TXNL4A  | 0 | 7.9  | 3.7  | 4.2  | -0.4  |
| SAMD1   | 8 | 16.6 | 3.9  | 12.7 | -8.7  |
| BRD4    | 8 | 18.6 | 5.3  | 13.4 | -8.1  |
| SLC39A3 | 8 | 15.8 | 4.4  | 11.5 | -7.1  |
| NFIC    | 3 | 21.1 | 8.6  | 12.5 | -4.0  |
| TPGS1   | 8 | 49.1 | 7.6  | 41.4 | -33.8 |
| PLPP2   | 9 | 7.5  | 0.9  | 6.6  | -5.7  |
| PFKL    | 2 | 13.5 | 4.6  | 8.9  | -4.4  |
| MVB12A  | 8 | 20.9 | 3.6  | 17.3 | -13.6 |
| SH3GL1  | 8 | 14.2 | 4.1  | 10.1 | -6.0  |
| DUS3L   | 0 | 7.7  | 2.7  | 4.9  | -2.2  |
| DPP9    | 8 | 15.1 | 3.7  | 11.4 | -7.8  |
| CCDC97  | 2 | 16.5 | 5.1  | 11.4 | -6.3  |
| SIRT3   | 0 | 8.8  | 3.9  | 4.9  | -0.9  |
| IFITM3  | 0 | 10.3 | 5.1  | 5.2  | -0.2  |
| ATHL1   | 0 | 7.9  | 3.4  | 4.6  | -1.2  |
| COL6A1  | 3 | 19.6 | 13.0 | 6.6  | 6.4   |
| IFNAR1  | 1 | 9.4  | 5.1  | 4.3  | 0.8   |
| SOD1    | 0 | 10.4 | 4.4  | 6.0  | -1.6  |
| COL6A2  | 3 | 17.7 | 11.0 | 6.7  | 4.4   |

|           |    |      |      |      |       |
|-----------|----|------|------|------|-------|
| SCYL1     | 2  | 19.4 | 7.7  | 11.8 | -4.1  |
| TMEM50B   | 1  | 9.4  | 4.8  | 4.6  | 0.2   |
| APP       | 3  | 11.3 | 4.8  | 6.6  | -1.8  |
| DOPEY2    | 0  | 12.0 | 4.8  | 7.2  | -2.4  |
| URB1      | 2  | 24.0 | 10.2 | 13.8 | -3.5  |
| AKT1      | 0  | 8.7  | 4.3  | 4.5  | -0.2  |
| EMP3      | 3  | 9.8  | 4.3  | 5.5  | -1.3  |
| SAE1      | 5  | 11.1 | 4.1  | 6.9  | -2.8  |
| GEMIN7    | 0  | 12.2 | 4.7  | 7.4  | -2.7  |
| WTIP      | 0  | 7.8  | 3.7  | 4.1  | -0.5  |
| ADAMTS10  | 3  | 6.7  | 2.3  | 4.4  | -2.1  |
| RNPEPL1   | 2  | 15.5 | 4.6  | 11.0 | -6.4  |
| CAPN10    | 2  | 22.9 | 10.7 | 12.2 | -1.5  |
| ERVK3-1   | 0  | 7.2  | 3.5  | 3.7  | -0.2  |
| ZNF787    | 4  | 33.7 | 5.6  | 28.1 | -22.5 |
| C19orf52  | 8  | 33.6 | 7.3  | 26.3 | -19.0 |
| CARM1     | 8  | 17.8 | 4.0  | 13.8 | -9.8  |
| EVI5L     | 10 | 19.4 | 1.5  | 17.9 | -16.3 |
| PSMB6     | 0  | 14.2 | 6.1  | 8.1  | -2.0  |
| ZNF473    | 0  | 12.0 | 5.5  | 6.6  | -1.1  |
| RPS11     | 0  | 12.7 | 7.3  | 5.4  | 1.8   |
| RPL13A    | 0  | 9.8  | 5.8  | 4.0  | 1.8   |
| NOSIP     | 2  | 16.2 | 5.2  | 11.1 | -5.9  |
| RERE      | 0  | 6.7  | 3.4  | 3.3  | 0.2   |
| MMEL1     | 2  | 18.4 | 6.4  | 12.0 | -5.6  |
| EPHA2     | 3  | 15.2 | 5.2  | 10.0 | -4.8  |
| EFHD2     | 3  | 18.0 | 6.0  | 12.0 | -6.0  |
| PEX14     | 2  | 33.4 | 15.3 | 18.1 | -2.7  |
| PGD       | 0  | 8.9  | 3.6  | 5.2  | -1.6  |
| SH3BGRL3  | 3  | 11.6 | 5.6  | 6.0  | -0.4  |
| RPL11     | 0  | 9.6  | 3.6  | 6.0  | -2.4  |
| ZNF593    | 2  | 44.3 | 24.3 | 20.0 | 4.3   |
| C1orf216  | 0  | 19.4 | 8.6  | 10.8 | -2.2  |
| KIAA0319I | 0  | 8.8  | 4.1  | 4.7  | -0.6  |
| EVA1B     | 0  | 17.8 | 6.9  | 10.9 | -4.0  |
| PLK4      | 7  | 47.5 | 8.8  | 38.7 | -29.9 |
| MAP3K6    | 0  | 16.2 | 6.5  | 9.6  | -3.1  |
| GPN2      | 0  | 14.9 | 6.5  | 8.4  | -1.9  |
| WDTC1     | 0  | 24.7 | 9.9  | 14.8 | -4.9  |
| HSPG2     | 3  | 12.7 | 4.9  | 7.9  | -3.0  |
| ITGB3BP   | 1  | 33.3 | 24.6 | 8.7  | 16.0  |
| SERBP1    | 1  | 83.9 | 77.8 | 6.0  | 71.8  |
| BCL10     | 1  | 11.2 | 6.2  | 4.9  | 1.3   |
| CYR61     | 3  | 21.7 | 14.0 | 7.8  | 6.2   |
| PRKACB    | 1  | 25.0 | 21.2 | 3.8  | 17.4  |
| PIGK      | 1  | 27.9 | 23.4 | 4.5  | 19.0  |
| TINAGL1   | 0  | 4.6  | 1.8  | 2.8  | -0.9  |
| RPS8      | 0  | 12.1 | 4.9  | 7.2  | -2.3  |
| KIF2C     | 5  | 25.8 | 14.5 | 11.3 | 3.3   |
| PTPRF     | 0  | 9.1  | 3.7  | 5.4  | -1.7  |
| LMO4      | 0  | 6.1  | 2.1  | 4.1  | -2.0  |
| MTF2      | 1  | 51.1 | 44.6 | 6.5  | 38.0  |
| SLC44A3   | 4  | 11.8 | 4.8  | 7.1  | -2.3  |
| IGSF3     | 0  | 5.5  | 2.6  | 2.9  | -0.2  |

|           |   |      |      |      |       |
|-----------|---|------|------|------|-------|
| CTTNBP2N1 | 1 | 18.2 | 10.0 | 8.2  | 1.8   |
| STRIP1    | 0 | 9.4  | 4.9  | 4.5  | 0.4   |
| PSMA5     | 6 | 43.4 | 12.2 | 31.1 | -18.9 |
| GPR161    | 0 | 8.5  | 4.0  | 4.5  | -0.5  |
| ALDH9A1   | 9 | 11.1 | 1.5  | 9.6  | -8.1  |
| ATP1B1    | 4 | 13.5 | 4.1  | 9.4  | -5.4  |
| TIPRL     | 1 | 16.7 | 11.4 | 5.2  | 6.2   |
| NME7      | 1 | 39.2 | 31.6 | 7.6  | 24.0  |
| POGK      | 9 | 11.1 | 1.9  | 9.1  | -7.2  |
| MPC2      | 4 | 12.9 | 5.1  | 7.8  | -2.7  |
| CREG1     | 0 | 8.8  | 3.1  | 5.7  | -2.7  |
| DCAF6     | 1 | 11.8 | 7.9  | 3.9  | 4.0   |
| UCK2      | 0 | 13.2 | 4.1  | 9.1  | -4.9  |
| TMCO1     | 0 | 9.7  | 2.5  | 7.2  | -4.8  |
| MGST3     | 3 | 8.9  | 2.8  | 6.1  | -3.3  |
| RFWD2     | 0 | 7.4  | 2.3  | 5.1  | -2.7  |
| UFC1      | 1 | 7.1  | 3.5  | 3.6  | -0.1  |
| PPOX      | 0 | 10.3 | 4.4  | 5.9  | -1.6  |
| NUF2      | 7 | 34.2 | 7.1  | 27.0 | -19.9 |
| SDHC      | 9 | 11.8 | 2.6  | 9.2  | -6.6  |
| PFDN2     | 9 | 8.9  | 1.9  | 7.1  | -5.2  |
| NR1I3     | 4 | 16.0 | 5.1  | 10.9 | -5.8  |
| USP21     | 9 | 12.5 | 2.4  | 10.1 | -7.7  |
| PRCC      | 9 | 8.8  | 2.9  | 5.9  | -2.9  |
| RRNAD1    | 9 | 15.3 | 2.2  | 13.0 | -10.8 |
| MRPL24    | 9 | 16.1 | 2.4  | 13.7 | -11.3 |
| ISG20L2   | 9 | 13.0 | 3.6  | 9.5  | -5.9  |
| CRABP2    | 0 | 8.5  | 3.9  | 4.7  | -0.8  |
| HDGF      | 9 | 12.7 | 2.6  | 10.1 | -7.6  |
| ABL2      | 3 | 15.8 | 7.2  | 8.6  | -1.4  |
| XPR1      | 1 | 12.8 | 9.0  | 3.8  | 5.1   |
| TOR1AIP1  | 1 | 27.5 | 22.0 | 5.6  | 16.4  |
| RGL1      | 0 | 7.9  | 4.2  | 3.8  | 0.4   |
| LYPLAL1   | 1 | 8.8  | 4.3  | 4.5  | -0.2  |
| PRUNE     | 9 | 19.6 | 3.5  | 16.1 | -12.6 |
| TUFT1     | 3 | 9.6  | 3.8  | 5.7  | -1.9  |
| SF3B4     | 9 | 15.4 | 3.2  | 12.2 | -9.0  |
| ECM1      | 3 | 12.2 | 5.4  | 6.8  | -1.4  |
| ZNF687    | 9 | 24.5 | 6.5  | 18.0 | -11.4 |
| TARS2     | 9 | 18.5 | 6.3  | 12.1 | -5.8  |
| CGN       | 4 | 16.5 | 8.2  | 8.3  | 0.0   |
| SNX27     | 9 | 7.5  | 2.0  | 5.5  | -3.5  |
| SETDB1    | 9 | 11.7 | 4.5  | 7.2  | -2.7  |
| MCL1      | 1 | 19.1 | 16.1 | 3.0  | 13.1  |
| RFX5      | 9 | 7.8  | 1.8  | 6.0  | -4.2  |
| PI4KB     | 9 | 15.7 | 5.1  | 10.6 | -5.4  |
| PIP5K1A   | 1 | 10.3 | 5.3  | 5.0  | 0.4   |
| ANP32E    | 1 | 71.9 | 63.6 | 8.3  | 55.3  |
| FAM63A    | 2 | 20.2 | 7.3  | 13.0 | -5.7  |
| ANXA9     | 4 | 22.9 | 14.1 | 8.8  | 5.3   |
| SELENBP1  | 4 | 16.0 | 4.3  | 11.7 | -7.4  |
| CERS2     | 9 | 10.4 | 1.5  | 8.9  | -7.4  |
| ENSA      | 9 | 12.2 | 3.9  | 8.3  | -4.4  |
| MRPL9     | 5 | 20.5 | 3.6  | 16.8 | -13.2 |

|          |   |      |      |      |       |
|----------|---|------|------|------|-------|
| ARNT     | 9 | 10.8 | 3.3  | 7.5  | -4.3  |
| POGZ     | 9 | 13.4 | 1.8  | 11.7 | -9.9  |
| OAZ3     | 6 | 11.5 | 3.3  | 8.2  | -4.9  |
| GOLPH3L  | 9 | 8.1  | 1.4  | 6.8  | -5.4  |
| DTL      | 5 | 18.8 | 6.1  | 12.6 | -6.5  |
| DYRK3    | 0 | 10.6 | 4.4  | 6.2  | -1.9  |
| EIF2D    | 0 | 12.6 | 5.1  | 7.5  | -2.5  |
| INTS7    | 1 | 9.5  | 4.6  | 4.9  | -0.4  |
| TAF1A    | 1 | 13.9 | 9.2  | 4.7  | 4.5   |
| SMYD2    | 0 | 7.1  | 2.6  | 4.5  | -1.9  |
| DUSP10   | 3 | 14.1 | 7.4  | 6.7  | 0.6   |
| TP53BP2  | 1 | 16.6 | 11.4 | 5.2  | 6.2   |
| ATP8B2   | 0 | 8.1  | 4.3  | 3.8  | 0.5   |
| ADAM15   | 9 | 20.8 | 2.2  | 18.6 | -16.4 |
| JTB      | 9 | 15.2 | 4.9  | 10.3 | -5.4  |
| RAB13    | 3 | 13.2 | 6.5  | 6.7  | -0.2  |
| TPM3     | 9 | 10.6 | 2.3  | 8.4  | -6.1  |
| SNAPIN   | 9 | 18.2 | 5.0  | 13.2 | -8.2  |
| SLC27A3  | 2 | 13.3 | 4.0  | 9.3  | -5.4  |
| UBAP2L   | 9 | 12.6 | 4.7  | 7.9  | -3.3  |
| SLC39A1  | 9 | 17.5 | 4.8  | 12.7 | -7.9  |
| HAX1     | 9 | 18.7 | 4.7  | 14.0 | -9.3  |
| CREB3L4  | 9 | 15.0 | 3.0  | 12.1 | -9.1  |
| C1orf43  | 9 | 13.0 | 4.5  | 8.6  | -4.1  |
| GATAD2B  | 9 | 11.6 | 2.6  | 9.0  | -6.4  |
| ILF2     | 9 | 10.1 | 2.3  | 7.8  | -5.5  |
| RIT1     | 9 | 9.8  | 1.8  | 8.0  | -6.2  |
| INTS3    | 9 | 14.3 | 5.3  | 9.0  | -3.7  |
| C1orf131 | 0 | 12.2 | 3.3  | 8.9  | -5.6  |
| GALNT2   | 3 | 14.3 | 7.0  | 7.3  | -0.3  |
| TTC13    | 0 | 5.2  | 1.9  | 3.3  | -1.3  |
| SCCPDH   | 0 | 10.7 | 2.8  | 7.9  | -5.1  |
| CEP170   | 1 | 49.5 | 42.0 | 7.4  | 34.6  |
| ACP1     | 1 | 28.7 | 24.5 | 4.2  | 20.4  |
| SNAP47   | 2 | 18.4 | 6.6  | 11.7 | -5.1  |
| SRP9     | 1 | 81.3 | 77.0 | 4.3  | 72.7  |
| NVL      | 1 | 20.5 | 14.0 | 6.5  | 7.5   |
| SDE2     | 0 | 8.2  | 3.5  | 4.7  | -1.1  |
| DEGS1    | 3 | 11.5 | 5.7  | 5.8  | -0.1  |
| FBX028   | 1 | 12.4 | 8.1  | 4.3  | 3.8   |
| ARF1     | 0 | 10.8 | 4.3  | 6.5  | -2.2  |
| CNIH4    | 0 | 9.5  | 3.5  | 5.9  | -2.4  |
| GUK1     | 3 | 22.8 | 8.5  | 14.3 | -5.8  |
| CDC42BPA | 1 | 16.5 | 13.4 | 3.1  | 10.3  |
| C1orf35  | 2 | 35.2 | 16.5 | 18.7 | -2.2  |
| PARP1    | 5 | 16.0 | 6.5  | 9.5  | -3.0  |
| PSEN2    | 0 | 14.1 | 5.0  | 9.1  | -4.1  |
| PYCR2    | 2 | 14.5 | 4.1  | 10.4 | -6.4  |
| LBR      | 7 | 25.2 | 3.7  | 21.5 | -17.8 |
| EPHX1    | 0 | 12.8 | 5.5  | 7.3  | -1.8  |
| SOX13    | 2 | 25.0 | 9.7  | 15.3 | -5.5  |
| ETNK2    | 0 | 11.7 | 5.4  | 6.3  | -0.8  |
| PLEKHA6  | 0 | 19.1 | 7.3  | 11.9 | -4.6  |
| ARL8A    | 3 | 13.5 | 6.9  | 6.6  | 0.3   |

|          |   |      |      |      |       |
|----------|---|------|------|------|-------|
| PDIA6    | 0 | 5.4  | 2.2  | 3.2  | -1.0  |
| RHOB     | 0 | 8.0  | 3.5  | 4.6  | -1.1  |
| HNRNPLL  | 1 | 34.9 | 26.2 | 8.7  | 17.5  |
| GALM     | 4 | 15.1 | 4.1  | 11.1 | -7.0  |
| CAMKMT   | 0 | 14.1 | 5.4  | 8.8  | -3.4  |
| EML4     | 1 | 22.7 | 16.4 | 6.3  | 10.1  |
| CALM2    | 1 | 57.5 | 52.7 | 4.8  | 47.9  |
| CHAC2    | 7 | 18.7 | 3.1  | 15.6 | -12.4 |
| RPS27A   | 1 | 50.8 | 40.8 | 10.0 | 30.8  |
| VPS54    | 1 | 26.8 | 20.5 | 6.3  | 14.2  |
| ASXL2    | 1 | 20.4 | 15.7 | 4.7  | 11.0  |
| ETAA1    | 1 | 15.7 | 12.2 | 3.5  | 8.7   |
| SNRPG    | 1 | 46.1 | 29.9 | 16.1 | 13.8  |
| CIAO1    | 2 | 15.7 | 6.1  | 9.6  | -3.5  |
| SNRNP200 | 0 | 9.4  | 4.1  | 5.4  | -1.3  |
| MRPS5    | 0 | 10.9 | 4.3  | 6.6  | -2.4  |
| TPRKB    | 1 | 62.1 | 50.0 | 12.1 | 37.9  |
| EXOC6B   | 0 | 7.0  | 2.0  | 5.0  | -3.1  |
| SFXN5    | 4 | 12.8 | 3.6  | 9.2  | -5.6  |
| TEX261   | 0 | 10.6 | 4.9  | 5.7  | -0.8  |
| DUSP11   | 1 | 12.3 | 7.6  | 4.7  | 2.9   |
| RALB     | 1 | 14.2 | 7.8  | 6.4  | 1.3   |
| TMEM177  | 2 | 25.6 | 9.6  | 16.0 | -6.4  |
| SLC20A1  | 3 | 7.3  | 2.7  | 4.5  | -1.8  |
| ZC3H8    | 1 | 19.4 | 14.0 | 5.5  | 8.5   |
| UBXN4    | 1 | 83.7 | 80.1 | 3.6  | 76.4  |
| SPOPL    | 1 | 22.4 | 18.6 | 3.8  | 14.9  |
| POLR2D   | 0 | 9.9  | 3.9  | 6.0  | -2.0  |
| AMMECR1L | 0 | 10.5 | 6.0  | 4.5  | 1.4   |
| PKP4     | 1 | 12.9 | 7.8  | 5.1  | 2.8   |
| SCRN3    | 1 | 14.9 | 12.0 | 2.9  | 9.1   |
| KIAA1715 | 1 | 32.4 | 24.8 | 7.5  | 17.3  |
| CDCA7    | 7 | 11.5 | 1.2  | 10.2 | -9.0  |
| UBR3     | 1 | 27.7 | 24.0 | 3.7  | 20.3  |
| GULP1    | 1 | 9.9  | 6.8  | 3.1  | 3.8   |
| HSPD1    | 1 | 76.0 | 66.7 | 9.4  | 57.3  |
| CCDC150  | 1 | 33.9 | 25.2 | 8.6  | 16.6  |
| METTL21A | 0 | 9.7  | 3.2  | 6.5  | -3.3  |
| SPAG16   | 1 | 10.8 | 7.2  | 3.6  | 3.6   |
| SUMF1    | 0 | 14.2 | 5.6  | 8.5  | -2.9  |
| RHBDD1   | 0 | 7.7  | 3.8  | 3.9  | -0.1  |
| ACKR3    | 0 | 7.4  | 1.7  | 5.8  | -4.1  |
| HES6     | 2 | 29.9 | 11.9 | 18.1 | -6.2  |
| ANKMY1   | 0 | 5.0  | 2.1  | 2.9  | -0.8  |
| COPS7B   | 6 | 7.7  | 1.1  | 6.6  | -5.4  |
| DIS3L2   | 0 | 12.1 | 4.6  | 7.5  | -2.8  |
| FANCD2   | 5 | 19.5 | 3.7  | 15.8 | -12.1 |
| TAMM41   | 2 | 17.7 | 7.4  | 10.3 | -3.0  |
| VGLL4    | 0 | 10.8 | 5.1  | 5.7  | -0.6  |
| RAB5A    | 1 | 45.1 | 41.3 | 3.8  | 37.6  |
| FAM134A  | 0 | 10.2 | 5.4  | 4.9  | 0.5   |
| CTDSP1   | 2 | 16.4 | 4.8  | 11.5 | -6.7  |
| RQCD1    | 0 | 9.1  | 3.3  | 5.7  | -2.4  |
| STK11IP  | 0 | 7.0  | 3.7  | 3.3  | 0.4   |

|           |   |       |       |      |       |
|-----------|---|-------|-------|------|-------|
| GMPPA     | 0 | 7.7   | 3.8   | 3.8  | 0.0   |
| EAF1      | 4 | 13.1  | 3.8   | 9.3  | -5.6  |
| DYNC1LI1  | 1 | 39.1  | 29.3  | 9.8  | 19.5  |
| OSBPL10   | 0 | 5.7   | 2.4   | 3.3  | -0.9  |
| POMGNT2   | 2 | 20.6  | 8.0   | 12.5 | -4.5  |
| CSRNP1    | 2 | 17.4  | 6.9   | 10.5 | -3.7  |
| SLC25A38  | 2 | 14.1  | 4.7   | 9.5  | -4.8  |
| GOLGA4    | 1 | 40.3  | 34.9  | 5.4  | 29.5  |
| CTDSPL    | 4 | 9.1   | 2.2   | 6.9  | -4.7  |
| IQSEC1    | 0 | 10.5  | 4.5   | 6.0  | -1.6  |
| RPL32     | 6 | 10.3  | 1.5   | 8.8  | -7.3  |
| PTPRG     | 1 | 9.4   | 5.5   | 3.9  | 1.6   |
| SHQ1      | 0 | 6.4   | 2.7   | 3.7  | -1.0  |
| SLC25A26  | 2 | 18.2  | 7.0   | 11.2 | -4.3  |
| UBA3      | 1 | 56.1  | 50.7  | 5.4  | 45.4  |
| ARL6IP5   | 3 | 18.9  | 11.0  | 7.9  | 3.1   |
| TMF1      | 1 | 37.1  | 32.5  | 4.6  | 27.9  |
| LRIG1     | 0 | 6.5   | 2.7   | 3.8  | -1.1  |
| RP11-9770 | 1 | 48.5  | 41.5  | 7.0  | 34.5  |
| LIMD1     | 0 | 12.6  | 6.2   | 6.4  | -0.1  |
| NFKBIZ    | 0 | 7.3   | 2.8   | 4.5  | -1.6  |
| NXPE3     | 0 | 6.7   | 3.1   | 3.7  | -0.6  |
| PHLDB2    | 1 | 22.2  | 12.3  | 9.9  | 2.4   |
| ABHD10    | 1 | 12.5  | 8.0   | 4.5  | 3.4   |
| RABL3     | 1 | 11.5  | 8.7   | 2.8  | 5.8   |
| ATG3      | 1 | 13.3  | 8.4   | 5.0  | 3.4   |
| SRPRB     | 4 | 12.4  | 3.6   | 8.9  | -5.3  |
| EIF2A     | 1 | 123.7 | 113.0 | 10.7 | 102.3 |
| OSBPL11   | 1 | 10.0  | 6.9   | 3.1  | 3.7   |
| NCEH1     | 3 | 9.7   | 3.0   | 6.7  | -3.8  |
| LPP       | 0 | 11.7  | 3.0   | 8.7  | -5.7  |
| TMEM44    | 0 | 8.0   | 3.7   | 4.3  | -0.5  |
| RUBCN     | 2 | 17.9  | 6.8   | 11.1 | -4.2  |
| AMT       | 4 | 13.2  | 2.9   | 10.4 | -7.5  |
| TCTA      | 2 | 18.9  | 7.5   | 11.4 | -3.8  |
| NICN1     | 2 | 18.7  | 7.2   | 11.5 | -4.4  |
| VPRBP     | 0 | 10.5  | 5.1   | 5.4  | -0.3  |
| MANF      | 6 | 13.7  | 2.6   | 11.1 | -8.5  |
| EIF2B5    | 0 | 10.0  | 3.9   | 6.1  | -2.2  |
| ECE2      | 2 | 27.4  | 9.5   | 17.8 | -8.3  |
| DGKQ      | 2 | 26.6  | 11.3  | 15.3 | -4.0  |
| FIP1L1    | 1 | 38.8  | 32.1  | 6.8  | 25.3  |
| LYAR      | 1 | 27.5  | 17.2  | 10.3 | 6.9   |
| ATP10D    | 1 | 10.0  | 6.8   | 3.3  | 3.5   |
| OCIAD2    | 3 | 15.1  | 8.1   | 7.0  | 1.1   |
| PLAC8     | 0 | 5.7   | 2.3   | 3.4  | -1.1  |
| ENOPH1    | 1 | 8.6   | 4.9   | 3.7  | 1.3   |
| CAMK2D    | 1 | 11.6  | 6.7   | 4.9  | 1.7   |
| CISD2     | 1 | 26.2  | 22.5  | 3.7  | 18.7  |
| TIFA      | 0 | 5.3   | 2.1   | 3.2  | -1.1  |
| CCNA2     | 5 | 24.9  | 7.3   | 17.5 | -10.2 |
| METTL14   | 1 | 63.1  | 56.5  | 6.6  | 50.0  |
| USP53     | 1 | 12.3  | 9.6   | 2.7  | 6.9   |
| SETD7     | 1 | 9.1   | 4.9   | 4.2  | 0.7   |



|          |    |       |       |      |       |
|----------|----|-------|-------|------|-------|
| NAF1     | 0  | 10.2  | 4.1   | 6.1  | -2.0  |
| RPS3A    | 0  | 14.0  | 5.6   | 8.4  | -2.8  |
| PDGFC    | 0  | 11.2  | 2.6   | 8.6  | -6.1  |
| CBR4     | 1  | 9.4   | 5.0   | 4.3  | 0.7   |
| NDUFS6   | 0  | 9.2   | 3.1   | 6.1  | -3.0  |
| 6-Mar    | 1  | 18.4  | 14.8  | 3.6  | 11.2  |
| SRD5A1   | 2  | 11.6  | 3.6   | 8.0  | -4.4  |
| RPL37    | 6  | 14.2  | 5.2   | 9.0  | -3.8  |
| SKP2     | 0  | 15.5  | 5.1   | 10.3 | -5.2  |
| OSMR     | 3  | 15.5  | 8.8   | 6.7  | 2.2   |
| PLK2     | 3  | 19.1  | 11.3  | 7.8  | 3.5   |
| PIK3R1   | 1  | 9.2   | 6.1   | 3.1  | 3.0   |
| LHFPL2   | 0  | 5.6   | 2.4   | 3.1  | -0.7  |
| SSBP2    | 3  | 9.7   | 2.8   | 6.9  | -4.2  |
| RASA1    | 1  | 19.8  | 11.1  | 8.7  | 2.4   |
| PIP5K2   | 1  | 66.9  | 60.0  | 6.9  | 53.1  |
| PAM      | 3  | 10.8  | 3.2   | 7.6  | -4.4  |
| BDP1     | 1  | 41.9  | 35.8  | 6.1  | 29.7  |
| SLC30A5  | 1  | 65.2  | 54.0  | 11.2 | 42.8  |
| BTF3     | 1  | 24.7  | 19.0  | 5.7  | 13.3  |
| FBXL17   | 0  | 6.6   | 2.9   | 3.7  | -0.8  |
| TNFAIP8  | 3  | 10.6  | 3.8   | 6.8  | -3.0  |
| FEM1C    | 1  | 12.1  | 8.6   | 3.5  | 5.1   |
| COMMD10  | 1  | 10.2  | 5.9   | 4.3  | 1.6   |
| ATG12    | 1  | 36.0  | 29.4  | 6.5  | 22.9  |
| YIPF5    | 1  | 15.2  | 10.6  | 4.6  | 6.1   |
| ARHGAP26 | 0  | 5.6   | 2.1   | 3.5  | -1.4  |
| DDX46    | 1  | 126.2 | 116.5 | 9.7  | 106.9 |
| RNF145   | 1  | 17.9  | 13.5  | 4.4  | 9.1   |
| FBXO38   | 1  | 61.7  | 57.4  | 4.3  | 53.2  |
| TNIP1    | 3  | 19.7  | 11.5  | 8.2  | 3.2   |
| G3BP1    | 1  | 54.6  | 47.2  | 7.4  | 39.7  |
| NHP2     | 0  | 13.6  | 5.9   | 7.7  | -1.8  |
| RMND5B   | 2  | 19.1  | 7.5   | 11.6 | -4.1  |
| BOD1     | 0  | 10.5  | 3.2   | 7.3  | -4.2  |
| TBC1D7   | 0  | 8.6   | 3.6   | 5.0  | -1.4  |
| FARS2    | 2  | 49.8  | 27.0  | 22.8 | 4.2   |
| CDKAL1   | 8  | 13.7  | 1.9   | 11.8 | -9.9  |
| ZMAT2    | 1  | 14.6  | 9.5   | 5.1  | 4.4   |
| DCDC2    | 0  | 6.8   | 2.5   | 4.3  | -1.8  |
| TRIM41   | 2  | 16.6  | 6.3   | 10.3 | -4.0  |
| HIGD2A   | 0  | 10.4  | 4.6   | 5.9  | -1.3  |
| FAM193B  | 0  | 7.3   | 2.7   | 4.7  | -2.0  |
| TNFRSF21 | 3  | 14.9  | 5.9   | 9.1  | -3.2  |
| RNF44    | 0  | 11.9  | 4.0   | 7.9  | -3.9  |
| MUT      | 1  | 10.2  | 7.2   | 3.0  | 4.2   |
| ABT1     | 11 | 31.3  | 2.6   | 28.7 | -26.1 |
| PPP1R18  | 3  | 31.2  | 21.9  | 9.3  | 12.5  |
| PRIM2    | 5  | 11.3  | 3.1   | 8.3  | -5.2  |
| RPL7L1   | 0  | 8.7   | 3.2   | 5.5  | -2.4  |
| NFKBIE   | 0  | 16.7  | 6.1   | 10.6 | -4.4  |
| TPBG     | 3  | 7.7   | 2.5   | 5.3  | -2.8  |
| PHIP     | 1  | 36.1  | 31.2  | 4.8  | 26.4  |
| MMS22L   | 7  | 30.5  | 5.0   | 25.5 | -20.4 |

|          |   |       |      |      |       |
|----------|---|-------|------|------|-------|
| PNRC1    | 0 | 6.4   | 2.4  | 3.9  | -1.5  |
| PM2OD2   | 7 | 14.6  | 2.0  | 12.5 | -10.5 |
| RARS2    | 1 | 10.4  | 7.0  | 3.4  | 3.6   |
| RNF217   | 1 | 10.1  | 6.2  | 3.9  | 2.3   |
| ARHGAP18 | 1 | 11.4  | 6.7  | 4.7  | 2.0   |
| ABRACL   | 0 | 5.7   | 1.7  | 3.9  | -2.2  |
| SLC18B1  | 4 | 16.6  | 7.6  | 9.0  | -1.4  |
| MTFR2    | 7 | 12.0  | 2.2  | 9.8  | -7.6  |
| AIG1     | 4 | 9.5   | 3.5  | 6.1  | -2.6  |
| DYNLT1   | 0 | 6.3   | 2.5  | 3.8  | -1.2  |
| TIAM2    | 0 | 6.3   | 3.1  | 3.2  | 0.0   |
| TMEM181  | 1 | 14.6  | 11.5 | 3.1  | 8.5   |
| WTAP     | 1 | 16.7  | 13.6 | 3.1  | 10.5  |
| ZMYM4    | 1 | 40.2  | 36.8 | 3.4  | 33.4  |
| ARMT1    | 1 | 47.5  | 40.1 | 7.4  | 32.7  |
| SLC22A3  | 0 | 7.3   | 3.0  | 4.3  | -1.3  |
| GNA12    | 3 | 16.6  | 6.9  | 9.7  | -2.9  |
| C7orf50  | 2 | 16.5  | 5.0  | 11.4 | -6.4  |
| CCZ1B    | 0 | 9.2   | 3.6  | 5.6  | -2.0  |
| C7orf26  | 2 | 14.9  | 5.3  | 9.6  | -4.3  |
| CREB5    | 3 | 9.9   | 3.5  | 6.4  | -2.9  |
| EGFR     | 0 | 7.6   | 2.9  | 4.7  | -1.8  |
| CDCA5    | 5 | 28.3  | 15.8 | 12.5 | 3.2   |
| IGFBP3   | 3 | 11.3  | 4.3  | 6.9  | -2.6  |
| PURB     | 0 | 5.6   | 2.0  | 3.6  | -1.6  |
| IGFBP1   | 0 | 7.3   | 2.9  | 4.4  | -1.5  |
| MDH2     | 0 | 11.6  | 4.2  | 7.4  | -3.2  |
| GBAS     | 1 | 42.1  | 34.9 | 7.2  | 27.7  |
| CCT6A    | 1 | 106.3 | 95.8 | 10.5 | 85.4  |
| PSPH     | 4 | 10.4  | 2.9  | 7.4  | -4.5  |
| ATXN7L1  | 2 | 13.4  | 5.5  | 7.8  | -2.3  |
| TMEM168  | 1 | 12.0  | 9.6  | 2.4  | 7.1   |
| C7orf43  | 2 | 19.3  | 8.6  | 10.7 | -2.1  |
| SLC12A9  | 2 | 21.4  | 7.2  | 14.2 | -7.0  |
| GIGYF1   | 2 | 19.0  | 7.2  | 11.8 | -4.6  |
| TRIM4    | 0 | 6.0   | 2.9  | 3.1  | -0.2  |
| MEPCE    | 2 | 16.7  | 6.8  | 9.8  | -3.0  |
| TMEM209  | 1 | 14.1  | 9.9  | 4.1  | 5.8   |
| TMEM140  | 4 | 12.8  | 3.1  | 9.7  | -6.6  |
| TLK2     | 1 | 63.1  | 55.0 | 8.0  | 47.0  |
| NOM1     | 1 | 10.0  | 5.2  | 4.8  | 0.4   |
| NCAPG2   | 7 | 26.8  | 6.5  | 20.3 | -13.8 |
| LUC7L2   | 1 | 12.7  | 9.6  | 3.1  | 6.5   |
| SH3KBP1  | 3 | 10.9  | 4.6  | 6.3  | -1.7  |
| CASK     | 1 | 9.9   | 5.9  | 4.0  | 1.8   |
| KDM6A    | 1 | 13.8  | 9.2  | 4.6  | 4.7   |
| MSN      | 3 | 13.7  | 7.4  | 6.3  | 1.1   |
| HDAC8    | 0 | 6.4   | 2.7  | 3.7  | -1.1  |
| SLC16A2  | 3 | 10.7  | 4.7  | 5.9  | -1.2  |
| KRBOX4   | 0 | 7.6   | 3.8  | 3.8  | 0.1   |
| NDUFB11  | 2 | 11.7  | 3.6  | 8.1  | -4.5  |
| ZMYM3    | 0 | 10.4  | 4.2  | 6.1  | -1.9  |
| TAF1     | 1 | 29.0  | 24.8 | 4.2  | 20.6  |
| NONO     | 6 | 20.0  | 4.3  | 15.7 | -11.3 |

|          |    |      |      |      |       |
|----------|----|------|------|------|-------|
| EBP      | 5  | 15.5 | 5.3  | 10.2 | -4.9  |
| OGT      | 1  | 23.5 | 20.9 | 2.6  | 18.2  |
| SNX12    | 0  | 8.9  | 4.4  | 4.5  | -0.1  |
| PRPS1    | 0  | 9.2  | 3.7  | 5.5  | -1.7  |
| RBMX     | 1  | 44.0 | 37.0 | 7.0  | 29.9  |
| MCPH1    | 0  | 7.8  | 3.0  | 4.8  | -1.7  |
| MFHAS1   | 0  | 6.9  | 3.4  | 3.5  | -0.2  |
| FBXO25   | 6  | 7.0  | 1.1  | 5.9  | -4.7  |
| NSDHL    | 0  | 11.2 | 4.6  | 6.6  | -2.0  |
| CETN2    | 0  | 6.9  | 2.5  | 4.5  | -2.0  |
| RPL10    | 0  | 6.3  | 3.3  | 3.0  | 0.3   |
| ATP6V1B2 | 0  | 7.3  | 3.7  | 3.6  | 0.1   |
| CCDC25   | 1  | 14.7 | 10.1 | 4.6  | 5.6   |
| HMBX1    | 0  | 7.9  | 3.3  | 4.6  | -1.2  |
| BIN3     | 0  | 9.4  | 4.6  | 4.8  | -0.2  |
| SLC25A37 | 3  | 8.7  | 2.5  | 6.1  | -3.6  |
| CHMP7    | 0  | 8.4  | 4.2  | 4.2  | 0.0   |
| DOCK5    | 0  | 6.2  | 2.6  | 3.6  | -1.0  |
| PROSC    | 0  | 8.9  | 2.8  | 6.1  | -3.4  |
| ERLIN2   | 0  | 7.5  | 3.8  | 3.6  | 0.2   |
| TACC1    | 1  | 7.7  | 4.2  | 3.5  | 0.8   |
| GOLGA7   | 1  | 18.6 | 13.6 | 5.0  | 8.6   |
| PLPP5    | 0  | 6.1  | 2.4  | 3.7  | -1.2  |
| GINS4    | 5  | 10.3 | 2.4  | 7.9  | -5.6  |
| WHSC1L1  | 1  | 15.5 | 12.2 | 3.3  | 8.9   |
| MRPS28   | 0  | 9.0  | 2.9  | 6.1  | -3.2  |
| LACTB2   | 1  | 9.0  | 5.1  | 3.9  | 1.3   |
| TERF1    | 1  | 19.1 | 16.1 | 3.0  | 13.1  |
| RPL7     | 1  | 20.4 | 18.1 | 2.3  | 15.7  |
| MTDH     | 1  | 53.3 | 49.0 | 4.4  | 44.6  |
| LRP12    | 1  | 14.6 | 8.0  | 6.7  | 1.3   |
| EBAG9    | 1  | 9.0  | 5.5  | 3.5  | 2.1   |
| POLR2K   | 1  | 12.7 | 9.7  | 3.0  | 6.7   |
| MAL2     | 4  | 12.1 | 5.0  | 7.1  | -2.1  |
| EIF3H    | 1  | 12.8 | 10.1 | 2.7  | 7.4   |
| UTP23    | 1  | 13.5 | 9.8  | 3.7  | 6.1   |
| NDUFB9   | 13 | 16.9 | 1.8  | 15.1 | -13.3 |
| TATDN1   | 1  | 26.5 | 22.7 | 3.8  | 18.9  |
| ZNF7     | 13 | 9.9  | 2.7  | 7.2  | -4.5  |
| SLC39A4  | 0  | 8.3  | 3.3  | 5.0  | -1.7  |
| NAPRT    | 0  | 7.2  | 2.8  | 4.4  | -1.6  |
| VLDLR    | 0  | 5.8  | 1.9  | 3.9  | -2.1  |
| AK3      | 1  | 7.2  | 4.3  | 2.8  | 1.5   |
| UHRF2    | 1  | 14.4 | 11.4 | 3.0  | 8.4   |
| NFIB     | 3  | 8.3  | 2.2  | 6.1  | -4.0  |
| PLIN2    | 0  | 8.8  | 4.1  | 4.7  | -0.6  |
| HAUS6    | 1  | 23.7 | 19.1 | 4.6  | 14.5  |
| CDKN2B   | 0  | 7.4  | 3.4  | 4.0  | -0.6  |
| CDKN2A   | 9  | 8.0  | 0.9  | 7.1  | -6.2  |
| ZCCHC7   | 1  | 8.5  | 4.6  | 3.9  | 0.7   |
| SIGMAR1  | 2  | 15.1 | 4.6  | 10.5 | -5.9  |
| CBWD5    | 0  | 8.5  | 3.6  | 5.0  | -1.4  |
| CEP78    | 5  | 13.5 | 2.3  | 11.2 | -8.8  |
| AUH      | 0  | 11.2 | 4.3  | 6.9  | -2.6  |

|          |    |      |      |      |       |
|----------|----|------|------|------|-------|
| MFSD14B  | 0  | 8.6  | 2.2  | 6.4  | -4.2  |
| C9orf3   | 3  | 6.5  | 2.1  | 4.3  | -2.2  |
| INIP     | 7  | 9.8  | 0.8  | 9.0  | -8.2  |
| UGCG     | 3  | 20.8 | 7.2  | 13.6 | -6.3  |
| STOM     | 0  | 6.5  | 2.9  | 3.7  | -0.8  |
| GSN      | 0  | 8.6  | 3.9  | 4.8  | -0.9  |
| MRRF     | 10 | 12.1 | 2.4  | 9.7  | -7.3  |
| ALAD     | 0  | 12.9 | 4.7  | 8.2  | -3.5  |
| POLE3    | 10 | 11.6 | 2.9  | 8.7  | -5.8  |
| SURF4    | 10 | 10.9 | 1.5  | 9.4  | -8.0  |
| SURF1    | 2  | 17.4 | 6.6  | 10.8 | -4.2  |
| SURF2    | 10 | 20.7 | 3.5  | 17.2 | -13.7 |
| SURF6    | 10 | 27.2 | 5.6  | 21.7 | -16.1 |
| MED22    | 10 | 24.9 | 4.8  | 20.1 | -15.3 |
| REXO4    | 10 | 26.6 | 7.9  | 18.6 | -10.7 |
| RPL7A    | 10 | 17.4 | 6.1  | 11.4 | -5.3  |
| GTF3C5   | 10 | 20.8 | 6.8  | 14.0 | -7.2  |
| ASB6     | 10 | 33.5 | 7.3  | 26.2 | -19.0 |
| PTGES2   | 10 | 12.9 | 2.0  | 10.9 | -8.9  |
| NTMT1    | 10 | 15.6 | 3.6  | 12.0 | -8.4  |
| CIZ1     | 0  | 9.5  | 3.2  | 6.3  | -3.1  |
| SLC25A25 | 2  | 28.5 | 12.6 | 15.9 | -3.2  |
| SH3GLB2  | 10 | 20.5 | 3.9  | 16.6 | -12.7 |
| FAM73B   | 2  | 37.8 | 18.6 | 19.2 | -0.7  |
| LRSAM1   | 10 | 19.4 | 1.8  | 17.6 | -15.8 |
| GPR107   | 0  | 6.8  | 3.2  | 3.6  | -0.3  |
| C9orf142 | 2  | 22.8 | 9.0  | 13.8 | -4.8  |
| INPP5E   | 2  | 35.6 | 16.0 | 19.6 | -3.6  |
| SEC16A   | 10 | 18.7 | 4.0  | 14.7 | -10.7 |
| DPH7     | 10 | 16.2 | 3.0  | 13.2 | -10.3 |
| NACC2    | 2  | 18.8 | 5.0  | 13.8 | -8.8  |
| PROSER2  | 2  | 16.3 | 6.1  | 10.2 | -4.2  |
| USP6NL   | 0  | 8.0  | 3.0  | 5.0  | -2.0  |
| COMMD3   | 6  | 14.3 | 3.3  | 11.0 | -7.8  |
| MSRB2    | 0  | 7.9  | 3.5  | 4.4  | -0.9  |
| PDSS1    | 0  | 13.1 | 3.9  | 9.2  | -5.3  |
| FAM171A1 | 0  | 7.0  | 3.4  | 3.6  | -0.2  |
| FAM188A  | 1  | 8.9  | 5.1  | 3.8  | 1.2   |
| RSU1     | 3  | 12.9 | 5.0  | 7.9  | -2.9  |
| PARD3    | 0  | 6.4  | 1.8  | 4.7  | -2.9  |
| ZEB1     | 1  | 16.1 | 11.3 | 4.8  | 6.5   |
| NRBF2    | 1  | 8.5  | 5.5  | 3.0  | 2.4   |
| POLR3A   | 8  | 14.0 | 2.1  | 11.9 | -9.8  |
| HERC4    | 1  | 18.2 | 11.3 | 6.9  | 4.4   |
| C10orf11 | 0  | 10.4 | 4.6  | 5.8  | -1.3  |
| CAMK2G   | 3  | 15.2 | 4.7  | 10.4 | -5.7  |
| GLUD1    | 0  | 13.8 | 4.3  | 9.5  | -5.3  |
| ANKRD1   | 3  | 9.0  | 3.5  | 5.6  | -2.1  |
| RPP30    | 5  | 17.6 | 3.0  | 14.6 | -11.6 |
| FRA10AC1 | 1  | 26.3 | 19.1 | 7.2  | 11.9  |
| ADD3     | 1  | 25.8 | 22.5 | 3.3  | 19.1  |
| HABP2    | 4  | 13.3 | 4.1  | 9.2  | -5.1  |
| DNAJB12  | 0  | 14.9 | 5.5  | 9.4  | -3.9  |
| EIF4EBP2 | 0  | 10.2 | 4.7  | 5.5  | -0.8  |

|          |   |      |      |      |       |
|----------|---|------|------|------|-------|
| TCF7L2   | 0 | 7.0  | 3.5  | 3.5  | 0.0   |
| MKI67    | 7 | 25.8 | 6.7  | 19.1 | -12.4 |
| FUOM     | 2 | 22.7 | 10.6 | 12.1 | -1.6  |
| LRRC27   | 0 | 8.6  | 4.6  | 4.0  | 0.6   |
| MTG1     | 0 | 13.4 | 6.5  | 6.9  | -0.3  |
| GSTO1    | 0 | 8.2  | 3.5  | 4.7  | -1.2  |
| PPRC1    | 0 | 14.2 | 7.1  | 7.1  | 0.0   |
| PDCD11   | 0 | 12.5 | 5.9  | 6.5  | -0.6  |
| RGS10    | 0 | 8.0  | 3.4  | 4.6  | -1.1  |
| BTBD10   | 1 | 15.7 | 7.6  | 8.1  | -0.6  |
| ADM      | 3 | 8.2  | 2.7  | 5.5  | -2.9  |
| LIN7C    | 1 | 22.5 | 18.0 | 4.4  | 13.6  |
| IMMP1L   | 6 | 7.5  | 1.5  | 6.0  | -4.5  |
| PGAP2    | 2 | 15.1 | 5.0  | 10.1 | -5.1  |
| TUT1     | 2 | 22.7 | 10.6 | 12.1 | -1.5  |
| HSD17B12 | 1 | 21.0 | 17.5 | 3.5  | 14.0  |
| APIP     | 0 | 7.0  | 1.9  | 5.1  | -3.2  |
| DGKZ     | 2 | 13.0 | 3.9  | 9.1  | -5.2  |
| EIF3M    | 1 | 59.7 | 54.5 | 5.2  | 49.3  |
| TNKS1BP1 | 3 | 18.4 | 9.2  | 9.1  | 0.1   |
| SERPING1 | 0 | 7.3  | 3.4  | 3.9  | -0.6  |
| SSRP1    | 5 | 16.2 | 4.6  | 11.7 | -7.1  |
| SLC43A1  | 4 | 25.1 | 12.2 | 12.8 | -0.6  |
| PTPRJ    | 3 | 12.4 | 5.3  | 7.1  | -1.9  |
| C11orf49 | 0 | 12.2 | 5.0  | 7.2  | -2.3  |
| ARFGAP2  | 0 | 7.0  | 3.1  | 3.9  | -0.8  |
| CELF1    | 1 | 21.1 | 13.2 | 7.9  | 5.3   |
| C11orf73 | 0 | 11.5 | 4.4  | 7.2  | -2.8  |
| ENDOD1   | 0 | 8.1  | 3.2  | 4.9  | -1.8  |
| CCDC82   | 1 | 37.9 | 32.9 | 5.0  | 27.9  |
| SERPINH1 | 0 | 9.1  | 4.8  | 4.3  | 0.5   |
| CAPN5    | 2 | 26.5 | 12.7 | 13.8 | -1.1  |
| INTS4    | 0 | 7.6  | 3.1  | 4.5  | -1.4  |
| PAK1     | 4 | 8.7  | 2.7  | 6.0  | -3.4  |
| RPS3     | 0 | 13.9 | 6.1  | 7.8  | -1.7  |
| TTC12    | 0 | 6.7  | 3.2  | 3.5  | -0.4  |
| ATM      | 1 | 49.0 | 45.0 | 4.0  | 40.9  |
| AASDHPPT | 1 | 48.5 | 40.7 | 7.7  | 33.0  |
| LAMTOR1  | 0 | 9.0  | 4.2  | 4.8  | -0.6  |
| HYOU1    | 0 | 11.3 | 5.4  | 5.9  | -0.5  |
| CSRP2BP  | 0 | 6.4  | 3.0  | 3.4  | -0.4  |
| TKFC     | 0 | 16.8 | 5.7  | 11.1 | -5.3  |
| MTA2     | 2 | 17.5 | 6.1  | 11.4 | -5.3  |
| TMEM138  | 7 | 9.7  | 1.0  | 8.7  | -7.7  |
| FADS1    | 1 | 8.5  | 5.8  | 2.7  | 3.1   |
| EML3     | 0 | 8.8  | 4.1  | 4.7  | -0.6  |
| INCENP   | 5 | 18.0 | 7.8  | 10.2 | -2.4  |
| CPSF7    | 0 | 11.4 | 5.4  | 6.1  | -0.7  |
| B3GAT3   | 2 | 17.7 | 7.4  | 10.3 | -2.8  |
| EI24     | 0 | 12.9 | 5.9  | 7.0  | -1.1  |
| CHEK1    | 7 | 20.7 | 3.6  | 17.1 | -13.4 |
| SIDT2    | 0 | 9.9  | 5.1  | 4.7  | 0.4   |
| TAGLN    | 1 | 12.1 | 6.7  | 5.4  | 1.3   |
| COMM7    | 0 | 9.3  | 3.3  | 6.0  | -2.7  |

|          |    |      |      |      |       |
|----------|----|------|------|------|-------|
| DSN1     | 7  | 24.6 | 4.4  | 20.1 | -15.7 |
| SOGA1    | 0  | 16.3 | 6.8  | 9.4  | -2.6  |
| LSM14B   | 0  | 12.0 | 5.5  | 6.5  | -1.0  |
| YTHDF1   | 0  | 8.9  | 3.8  | 5.1  | -1.3  |
| CABLES2  | 0  | 10.4 | 4.2  | 6.3  | -2.1  |
| ORAOV1   | 1  | 12.2 | 6.6  | 5.6  | 1.0   |
| TRPT1    | 2  | 18.8 | 8.6  | 10.2 | -1.5  |
| NUDT22   | 2  | 26.8 | 13.1 | 13.7 | -0.7  |
| PLCB3    | 2  | 18.5 | 6.6  | 11.8 | -5.2  |
| MRPL49   | 2  | 19.6 | 8.3  | 11.3 | -3.0  |
| CDC42EP2 | 0  | 8.0  | 3.2  | 4.8  | -1.7  |
| FAU      | 0  | 13.4 | 6.2  | 7.1  | -0.9  |
| TM7SF2   | 4  | 18.5 | 5.5  | 13.0 | -7.5  |
| VPS51    | 0  | 15.0 | 6.7  | 8.3  | -1.6  |
| PPP4C    | 11 | 19.8 | 4.7  | 15.1 | -10.4 |
| ALDOA    | 11 | 9.1  | 0.8  | 8.2  | -7.4  |
| HIRIP3   | 11 | 24.1 | 3.7  | 20.4 | -16.7 |
| TAOK2    | 11 | 24.6 | 5.9  | 18.7 | -12.8 |
| TMEM219  | 11 | 24.9 | 4.5  | 20.4 | -15.9 |
| HMGA2    | 1  | 13.5 | 6.4  | 7.0  | -0.6  |
| ITGB1    | 1  | 38.0 | 32.7 | 5.3  | 27.5  |
| CWC15    | 1  | 34.9 | 26.9 | 8.0  | 18.9  |
| ARID5B   | 1  | 12.9 | 6.8  | 6.1  | 0.7   |
| DCUN1D2  | 0  | 7.7  | 3.8  | 3.9  | -0.1  |
| TMC03    | 0  | 7.3  | 2.9  | 4.5  | -1.6  |
| TMEM218  | 0  | 13.3 | 5.7  | 7.6  | -1.9  |
| TIRAP    | 2  | 23.6 | 10.7 | 12.9 | -2.2  |
| N6AMT2   | 0  | 11.2 | 4.3  | 6.9  | -2.7  |
| LATS2    | 0  | 6.8  | 3.0  | 3.8  | -0.8  |
| SAP18    | 6  | 29.1 | 11.3 | 17.8 | -6.4  |
| KIAA1328 | 1  | 9.2  | 6.0  | 3.2  | 2.9   |
| CTAGE5   | 1  | 19.2 | 10.3 | 8.9  | 1.4   |
| HNMT     | 4  | 9.5  | 3.1  | 6.3  | -3.2  |
| LYPD1    | 3  | 13.4 | 6.6  | 6.7  | -0.1  |
| PDCD4    | 1  | 18.8 | 16.0 | 2.8  | 13.2  |
| PRSS23   | 3  | 11.5 | 5.7  | 5.7  | 0.0   |
| MTMR12   | 0  | 7.5  | 3.5  | 4.0  | -0.6  |
| CCT5     | 7  | 26.1 | 3.2  | 22.9 | -19.6 |
| FAM173B  | 0  | 5.4  | 1.9  | 3.5  | -1.6  |
| DOCK1    | 0  | 8.5  | 2.8  | 5.7  | -2.8  |
| DLAT     | 1  | 18.9 | 10.3 | 8.6  | 1.7   |
| C11orf57 | 1  | 14.3 | 9.1  | 5.2  | 3.9   |
| TIMM8B   | 2  | 20.2 | 7.4  | 12.8 | -5.5  |
| IL18     | 0  | 6.2  | 2.1  | 4.1  | -1.9  |
| PTS      | 1  | 17.6 | 12.8 | 4.8  | 8.1   |
| PIP4K2A  | 0  | 11.8 | 2.3  | 9.6  | -7.3  |
| CRIM1    | 3  | 19.9 | 8.7  | 11.2 | -2.6  |
| SEC24D   | 1  | 9.8  | 5.8  | 4.0  | 1.7   |
| DHX37    | 2  | 24.8 | 8.8  | 16.0 | -7.2  |
| UBC      | 6  | 8.9  | 1.8  | 7.1  | -5.3  |
| SLC7A11  | 1  | 10.0 | 6.0  | 3.9  | 2.1   |
| NOCT     | 0  | 8.5  | 3.6  | 4.9  | -1.3  |
| DCP1B    | 0  | 8.7  | 4.8  | 3.9  | 0.9   |
| NGLY1    | 1  | 15.3 | 10.1 | 5.2  | 4.9   |

|          |   |      |      |      |       |
|----------|---|------|------|------|-------|
| OXSM     | 0 | 8.9  | 3.4  | 5.5  | -2.1  |
| UEVLD    | 1 | 18.8 | 14.7 | 4.1  | 10.6  |
| C12orf45 | 0 | 19.3 | 7.0  | 12.2 | -5.2  |
| TMEM263  | 1 | 42.3 | 38.9 | 3.4  | 35.4  |
| UBE3B    | 0 | 15.3 | 6.0  | 9.3  | -3.3  |
| PLBD2    | 0 | 13.0 | 7.0  | 6.0  | 1.1   |
| DLG5     | 0 | 6.6  | 2.9  | 3.6  | -0.7  |
| GXYLT1   | 1 | 21.6 | 16.4 | 5.3  | 11.1  |
| TWF1     | 1 | 78.5 | 72.8 | 5.7  | 67.1  |
| EIF4E    | 1 | 86.3 | 81.9 | 4.4  | 77.5  |
| MAGI1    | 4 | 11.2 | 3.0  | 8.2  | -5.1  |
| TEX30    | 1 | 10.6 | 6.1  | 4.5  | 1.6   |
| CSNK1G3  | 1 | 42.9 | 39.2 | 3.7  | 35.5  |
| SRFBP1   | 1 | 28.6 | 21.4 | 7.2  | 14.2  |
| FAM177A1 | 1 | 8.2  | 4.9  | 3.3  | 1.5   |
| MBIP     | 1 | 25.3 | 20.4 | 4.9  | 15.5  |
| EXT2     | 0 | 10.7 | 5.2  | 5.6  | -0.4  |
| TMEM18   | 0 | 9.6  | 4.0  | 5.6  | -1.6  |
| NDUFC2   | 0 | 11.3 | 4.0  | 7.2  | -3.2  |
| ME3      | 0 | 17.2 | 5.8  | 11.4 | -5.6  |
| NUBPL    | 0 | 6.9  | 2.4  | 4.5  | -2.1  |
| NEK7     | 1 | 25.7 | 19.7 | 6.0  | 13.7  |
| VIPAS39  | 0 | 10.3 | 4.9  | 5.4  | -0.5  |
| UPF2     | 1 | 34.3 | 29.3 | 5.0  | 24.3  |
| CDC123   | 1 | 60.9 | 50.8 | 10.1 | 40.7  |
| SCLT1    | 7 | 22.7 | 3.8  | 18.9 | -15.0 |
| FRMD4A   | 3 | 11.0 | 4.3  | 6.7  | -2.4  |
| EPS8     | 1 | 13.4 | 8.2  | 5.2  | 3.0   |
| ACAD8    | 0 | 14.6 | 6.6  | 8.1  | -1.5  |
| THYN1    | 0 | 10.5 | 4.8  | 5.7  | -1.0  |
| VPS26B   | 2 | 19.7 | 7.3  | 12.4 | -5.0  |
| NCAPD3   | 7 | 13.6 | 2.2  | 11.4 | -9.2  |
| VTI1A    | 0 | 8.8  | 3.8  | 5.0  | -1.2  |
| QDPR     | 0 | 6.7  | 2.9  | 3.8  | -0.9  |
| FAM160B1 | 1 | 22.3 | 15.0 | 7.2  | 7.8   |
| QTRTD1   | 1 | 14.1 | 9.1  | 4.9  | 4.2   |
| AKR1C2   | 4 | 16.8 | 7.5  | 9.3  | -1.8  |
| ITIH2    | 4 | 23.7 | 15.2 | 8.5  | 6.7   |
| KIN      | 1 | 24.6 | 18.2 | 6.4  | 11.8  |
| PIGF     | 1 | 30.0 | 25.1 | 4.8  | 20.3  |
| INPP1    | 4 | 8.3  | 1.9  | 6.4  | -4.5  |
| MFSD6    | 0 | 5.3  | 2.1  | 3.2  | -1.2  |
| ASAP2    | 3 | 11.4 | 3.9  | 7.5  | -3.5  |
| ADAM17   | 1 | 9.5  | 6.2  | 3.3  | 3.0   |
| WWC2     | 1 | 15.0 | 10.7 | 4.4  | 6.3   |
| CENPU    | 7 | 26.2 | 4.7  | 21.5 | -16.8 |
| ACSL1    | 0 | 5.4  | 2.2  | 3.2  | -1.0  |
| SLC25A4  | 0 | 8.0  | 2.9  | 5.0  | -2.1  |
| AMN1     | 0 | 7.3  | 3.1  | 4.3  | -1.2  |
| BICD1    | 1 | 7.3  | 3.8  | 3.6  | 0.2   |
| SAV1     | 1 | 12.7 | 8.4  | 4.3  | 4.1   |
| NBAS     | 0 | 8.5  | 3.2  | 5.3  | -2.1  |
| GUF1     | 1 | 11.0 | 7.3  | 3.7  | 3.6   |
| SACS     | 1 | 13.9 | 8.0  | 5.9  | 2.1   |

|          |   |      |      |      |       |
|----------|---|------|------|------|-------|
| CENPJ    | 1 | 29.5 | 22.5 | 7.0  | 15.4  |
| FBX04    | 0 | 6.5  | 2.8  | 3.7  | -1.0  |
| C5orf28  | 1 | 16.2 | 13.1 | 3.1  | 10.0  |
| PARP8    | 0 | 7.1  | 3.2  | 3.9  | -0.6  |
| CACUL1   | 1 | 10.9 | 7.3  | 3.5  | 3.8   |
| DST      | 1 | 38.8 | 34.6 | 4.2  | 30.5  |
| TIAL1    | 1 | 52.1 | 48.5 | 3.6  | 44.9  |
| BAG3     | 3 | 12.8 | 4.1  | 8.7  | -4.5  |
| SCHIP1   | 1 | 17.7 | 11.9 | 5.9  | 6.0   |
| AP1S3    | 0 | 7.7  | 2.5  | 5.2  | -2.7  |
| RABGAP1L | 1 | 10.2 | 7.7  | 2.5  | 5.2   |
| TMEM56   | 1 | 15.3 | 10.9 | 4.4  | 6.4   |
| MZT2B    | 0 | 10.7 | 3.7  | 7.0  | -3.3  |
| FAM168B  | 0 | 9.3  | 4.8  | 4.5  | 0.3   |
| PTPN14   | 3 | 19.8 | 10.1 | 9.7  | 0.5   |
| MGAT5    | 0 | 6.9  | 3.4  | 3.5  | -0.1  |
| GPATCH11 | 1 | 20.9 | 15.4 | 5.5  | 9.9   |
| HSPB8    | 0 | 9.7  | 4.2  | 5.5  | -1.3  |
| GEMIN6   | 0 | 15.2 | 5.0  | 10.2 | -5.2  |
| RNF219   | 1 | 16.6 | 12.3 | 4.3  | 8.0   |
| ARL14EP  | 1 | 28.2 | 24.3 | 3.9  | 20.5  |
| EPG5     | 3 | 9.8  | 4.6  | 5.2  | -0.6  |
| ATP5A1   | 0 | 7.1  | 3.3  | 3.8  | -0.4  |
| HAUS1    | 1 | 36.5 | 28.0 | 8.6  | 19.4  |
| C18orf25 | 1 | 13.0 | 8.3  | 4.7  | 3.6   |
| SPC25    | 7 | 30.9 | 7.0  | 23.9 | -16.9 |
| PDK1     | 1 | 6.2  | 3.1  | 3.0  | 0.1   |
| TGOLN2   | 0 | 10.5 | 5.3  | 5.2  | 0.0   |
| UHMK1    | 1 | 19.4 | 13.4 | 5.9  | 7.5   |
| ATG10    | 0 | 8.8  | 3.3  | 5.5  | -2.2  |
| POC5     | 1 | 23.5 | 18.0 | 5.6  | 12.4  |
| SPOCK1   | 3 | 14.6 | 7.3  | 7.3  | -0.1  |
| TADA1    | 9 | 7.1  | 1.3  | 5.8  | -4.6  |
| HOMER1   | 1 | 16.5 | 10.9 | 5.6  | 5.3   |
| XRCC4    | 1 | 10.6 | 6.6  | 4.0  | 2.5   |
| SUV39H2  | 7 | 38.5 | 5.8  | 32.7 | -26.9 |
| DCLRE1C  | 1 | 12.9 | 8.6  | 4.3  | 4.3   |
| RPP38    | 0 | 10.9 | 4.2  | 6.7  | -2.5  |
| NMT2     | 3 | 14.1 | 4.5  | 9.6  | -5.1  |
| USP12    | 1 | 9.7  | 6.4  | 3.3  | 3.2   |
| CCDC50   | 0 | 6.0  | 2.6  | 3.4  | -0.8  |
| ZFP36L2  | 4 | 14.7 | 5.6  | 9.1  | -3.5  |
| PAN3     | 1 | 12.1 | 8.9  | 3.3  | 5.6   |
| PFKM     | 1 | 7.9  | 4.5  | 3.4  | 1.1   |
| TMEM123  | 1 | 80.7 | 76.5 | 4.2  | 72.3  |
| MBNL1    | 1 | 31.4 | 27.8 | 3.6  | 24.2  |
| NADK2    | 1 | 17.1 | 10.9 | 6.2  | 4.7   |
| GPD1L    | 0 | 7.3  | 2.4  | 5.0  | -2.6  |
| GJA1     | 3 | 9.2  | 3.3  | 6.0  | -2.7  |
| SLC30A6  | 1 | 19.5 | 16.8 | 2.7  | 14.0  |
| PELO     | 0 | 5.6  | 2.7  | 2.9  | -0.2  |
| SAR1B    | 1 | 29.8 | 25.6 | 4.2  | 21.4  |
| FARP1    | 0 | 8.8  | 3.5  | 5.3  | -1.8  |
| PANK1    | 1 | 10.9 | 5.6  | 5.2  | 0.4   |



|          |    |      |      |      |      |
|----------|----|------|------|------|------|
| HNRNPDL  | 1  | 97.5 | 92.8 | 4.7  | 88.1 |
| HHEX     | 4  | 16.2 | 7.5  | 8.7  | -1.2 |
| UTRN     | 1  | 22.7 | 19.0 | 3.8  | 15.2 |
| PTPRK    | 0  | 12.0 | 3.5  | 8.5  | -5.0 |
| GGPS1    | 1  | 44.5 | 39.3 | 5.1  | 34.2 |
| RAD17    | 1  | 32.7 | 27.9 | 4.8  | 23.2 |
| MED21    | 1  | 35.3 | 29.4 | 5.9  | 23.5 |
| PLOD2    | 1  | 24.5 | 19.9 | 4.6  | 15.2 |
| ADGRA3   | 1  | 12.6 | 8.0  | 4.6  | 3.4  |
| SREK1IP1 | 1  | 22.0 | 16.0 | 6.1  | 9.9  |
| CWC27    | 1  | 35.6 | 28.5 | 7.1  | 21.3 |
| MR1      | 0  | 13.4 | 5.7  | 7.7  | -2.0 |
| SRP19    | 1  | 70.3 | 63.6 | 6.7  | 56.9 |
| CENPH    | 5  | 17.1 | 4.8  | 12.4 | -7.6 |
| CDYL     | 0  | 7.4  | 3.1  | 4.3  | -1.1 |
| CARHSP1  | 5  | 9.1  | 1.7  | 7.4  | -5.7 |
| TXNDC11  | 12 | 12.2 | 1.4  | 10.8 | -9.3 |
| DAB2     | 3  | 7.0  | 2.9  | 4.1  | -1.3 |
| BCL2L11  | 0  | 6.2  | 2.9  | 3.3  | -0.4 |
| ANAPC1   | 0  | 11.1 | 3.6  | 7.5  | -3.9 |
| CAST     | 1  | 12.4 | 8.3  | 4.1  | 4.2  |
| SCOC     | 1  | 57.1 | 51.4 | 5.7  | 45.8 |
| CETN3    | 1  | 33.6 | 23.4 | 10.2 | 13.2 |
| SMARCA5  | 1  | 82.5 | 68.6 | 13.9 | 54.8 |
| RASSF3   | 0  | 7.4  | 2.8  | 4.6  | -1.8 |
| HNRNPU   | 1  | 76.5 | 70.9 | 5.6  | 65.2 |
| RANBP2   | 1  | 45.3 | 41.4 | 3.9  | 37.4 |
| AHCTF1   | 1  | 46.6 | 39.8 | 6.8  | 33.0 |
| TMEM87B  | 1  | 10.1 | 6.2  | 3.9  | 2.3  |
| RBMS1    | 1  | 17.9 | 14.4 | 3.5  | 10.9 |
| FAM49B   | 1  | 13.7 | 8.5  | 5.2  | 3.2  |
| ASAP1    | 1  | 19.9 | 14.4 | 5.5  | 8.9  |
| TRAPPC8  | 1  | 37.4 | 32.7 | 4.7  | 28.0 |
| INO80C   | 0  | 8.3  | 3.2  | 5.1  | -1.9 |
| LPCAT1   | 0  | 8.9  | 3.3  | 5.6  | -2.4 |
| NMRAL1   | 0  | 10.3 | 4.3  | 6.0  | -1.7 |
| UBALD1   | 12 | 12.5 | 1.3  | 11.1 | -9.8 |
| TMEM251  | 0  | 7.8  | 2.8  | 5.0  | -2.2 |
| ING1     | 0  | 8.2  | 3.5  | 4.7  | -1.1 |
| CMTM7    | 0  | 5.8  | 2.5  | 3.3  | -0.8 |
| UBP1     | 1  | 36.7 | 32.7 | 4.0  | 28.7 |
| RMND5A   | 1  | 21.5 | 14.7 | 6.8  | 7.9  |
| RPIA     | 0  | 12.8 | 4.7  | 8.1  | -3.4 |
| LURAP1L  | 0  | 7.8  | 3.9  | 3.8  | 0.1  |
| CNKS3    | 0  | 7.0  | 2.2  | 4.8  | -2.7 |
| GTF2E1   | 1  | 7.6  | 4.3  | 3.3  | 0.9  |
| CFDP1    | 0  | 7.7  | 3.2  | 4.5  | -1.3 |
| ZDHHC7   | 6  | 7.9  | 1.4  | 6.5  | -5.1 |
| CMIP     | 0  | 5.2  | 2.3  | 2.9  | -0.6 |
| TRIP12   | 1  | 84.8 | 79.4 | 5.5  | 73.9 |
| CEBPG    | 1  | 14.4 | 8.4  | 6.1  | 2.3  |
| KCTD15   | 0  | 8.2  | 3.1  | 5.1  | -2.0 |
| DDAH1    | 0  | 5.8  | 1.8  | 4.0  | -2.2 |
| SREK1    | 1  | 84.7 | 80.4 | 4.2  | 76.2 |

|         |    |      |      |      |       |
|---------|----|------|------|------|-------|
| CHD1    | 1  | 58.3 | 51.9 | 6.4  | 45.4  |
| HS2ST1  | 1  | 25.2 | 21.3 | 3.9  | 17.4  |
| MSI2    | 0  | 10.8 | 3.9  | 6.9  | -3.0  |
| ZUFSP   | 1  | 18.3 | 14.1 | 4.3  | 9.8   |
| NUS1    | 1  | 17.3 | 14.3 | 3.0  | 11.3  |
| PPP2R5E | 1  | 17.3 | 12.5 | 4.8  | 7.8   |
| CABYR   | 0  | 6.5  | 2.2  | 4.3  | -2.1  |
| IMPACT  | 1  | 9.4  | 6.4  | 3.0  | 3.4   |
| ANKRD29 | 0  | 7.9  | 3.4  | 4.5  | -1.1  |
| ANKH    | 0  | 7.0  | 3.3  | 3.7  | -0.3  |
| OTULIN  | 0  | 6.8  | 3.1  | 3.7  | -0.6  |
| UBASH3B | 3  | 13.2 | 5.8  | 7.5  | -1.7  |
| TBRG1   | 0  | 7.1  | 3.6  | 3.5  | 0.1   |
| NRGN    | 0  | 14.1 | 5.1  | 9.0  | -3.8  |
| TOMM70A | 1  | 20.9 | 17.2 | 3.7  | 13.5  |
| PITPNC1 | 0  | 8.6  | 3.9  | 4.8  | -0.9  |
| CC2D1B  | 0  | 6.7  | 2.4  | 4.3  | -2.0  |
| PRKCA   | 3  | 10.2 | 3.9  | 6.3  | -2.4  |
| UCHL1   | 0  | 6.7  | 2.5  | 4.3  | -1.8  |
| MIA3    | 1  | 48.9 | 45.7 | 3.2  | 42.5  |
| TNIK    | 0  | 5.3  | 2.4  | 3.0  | -0.6  |
| NEIL2   | 2  | 16.2 | 6.6  | 9.6  | -3.0  |
| TRIM11  | 2  | 35.1 | 16.8 | 18.3 | -1.5  |
| ENAH    | 1  | 20.1 | 16.2 | 3.9  | 12.3  |
| SH3RF1  | 3  | 9.6  | 2.9  | 6.7  | -3.9  |
| BUB3    | 1  | 14.3 | 7.9  | 6.4  | 1.5   |
| FAM69A  | 1  | 12.9 | 8.8  | 4.1  | 4.7   |
| ATP5G3  | 6  | 13.8 | 3.6  | 10.2 | -6.6  |
| SORBS2  | 0  | 6.4  | 2.4  | 4.0  | -1.6  |
| TCEB1   | 1  | 40.7 | 36.3 | 4.4  | 31.9  |
| CXADR   | 0  | 9.1  | 2.4  | 6.7  | -4.2  |
| BTG3    | 0  | 10.1 | 2.9  | 7.2  | -4.4  |
| RABGEF1 | 1  | 7.6  | 4.2  | 3.5  | 0.7   |
| MRPL39  | 7  | 15.1 | 1.8  | 13.2 | -11.4 |
| ATP5J   | 0  | 7.8  | 3.0  | 4.8  | -1.8  |
| GABPA   | 1  | 18.7 | 15.9 | 2.8  | 13.1  |
| TSEN2   | 0  | 10.2 | 4.0  | 6.2  | -2.1  |
| XPC     | 0  | 7.5  | 3.6  | 3.8  | -0.2  |
| CCDC174 | 0  | 6.1  | 2.7  | 3.5  | -0.8  |
| FLCN    | 0  | 6.9  | 3.3  | 3.6  | -0.3  |
| DPH3    | 1  | 15.8 | 9.4  | 6.4  | 3.0   |
| OXNAD1  | 0  | 12.8 | 5.6  | 7.2  | -1.7  |
| CXXC1   | 0  | 11.5 | 4.6  | 6.8  | -2.2  |
| SKA1    | 5  | 10.5 | 3.1  | 7.5  | -4.4  |
| PPP4R1  | 1  | 11.8 | 7.6  | 4.2  | 3.4   |
| PIEZO2  | 0  | 7.2  | 3.2  | 4.0  | -0.7  |
| MPPE1   | 0  | 6.3  | 3.0  | 3.3  | -0.2  |
| EME1    | 5  | 12.4 | 3.5  | 8.9  | -5.4  |
| ANKRD40 | 7  | 9.7  | 0.8  | 8.9  | -8.1  |
| VOPP1   | 0  | 14.8 | 5.5  | 9.4  | -3.9  |
| APOOL   | 0  | 8.2  | 2.9  | 5.3  | -2.4  |
| FBXL18  | 11 | 29.9 | 2.0  | 27.9 | -26.0 |
| KLF10   | 3  | 6.9  | 2.1  | 4.9  | -2.8  |
| AZIN1   | 1  | 27.1 | 21.7 | 5.4  | 16.4  |

|          |    |      |      |      |       |
|----------|----|------|------|------|-------|
| ATP6V1C1 | 1  | 34.3 | 31.0 | 3.3  | 27.8  |
| TMEM55A  | 0  | 8.3  | 3.6  | 4.7  | -1.2  |
| OTUD6B   | 1  | 20.2 | 16.3 | 3.9  | 12.4  |
| CDK19    | 1  | 10.6 | 6.3  | 4.3  | 2.0   |
| GTF3C6   | 7  | 9.0  | 1.0  | 8.1  | -7.1  |
| AGPAT5   | 1  | 15.6 | 9.4  | 6.2  | 3.3   |
| MMS19    | 0  | 13.3 | 6.7  | 6.6  | 0.1   |
| PI4K2A   | 3  | 25.4 | 8.9  | 16.6 | -7.7  |
| ZFYVE27  | 2  | 18.7 | 7.7  | 11.0 | -3.3  |
| TRMT44   | 8  | 21.7 | 4.1  | 17.6 | -13.5 |
| SLC25A28 | 0  | 9.4  | 4.4  | 4.9  | -0.5  |
| HSPA13   | 1  | 24.5 | 20.4 | 4.1  | 16.3  |
| USP25    | 1  | 23.2 | 18.3 | 4.8  | 13.5  |
| GRAMD3   | 3  | 9.4  | 3.4  | 6.0  | -2.6  |
| ZCCHC10  | 0  | 11.0 | 3.2  | 7.8  | -4.6  |
| C16orf87 | 1  | 17.5 | 11.3 | 6.2  | 5.1   |
| MOV10    | 0  | 5.6  | 2.3  | 3.3  | -1.1  |
| RHOC     | 3  | 16.2 | 9.3  | 6.8  | 2.5   |
| DBI      | 0  | 9.1  | 2.3  | 6.8  | -4.5  |
| SLC16A1  | 1  | 29.1 | 25.0 | 4.1  | 20.9  |
| HEATR3   | 0  | 16.8 | 7.0  | 9.8  | -2.9  |
| NIFK     | 1  | 91.0 | 81.1 | 9.9  | 71.3  |
| OXA1L    | 0  | 9.3  | 3.3  | 5.9  | -2.6  |
| SLC7A7   | 0  | 6.1  | 2.0  | 4.1  | -2.1  |
| LARP1    | 0  | 12.5 | 5.3  | 7.2  | -1.9  |
| CNOT8    | 1  | 13.0 | 9.1  | 3.8  | 5.3   |
| SETD9    | 0  | 6.2  | 1.9  | 4.3  | -2.5  |
| MIER3    | 1  | 32.9 | 28.5 | 4.5  | 24.0  |
| NUP205   | 7  | 24.8 | 3.1  | 21.6 | -18.5 |
| C9orf85  | 10 | 8.5  | 0.9  | 7.5  | -6.6  |
| PIK3AP1  | 4  | 11.4 | 4.4  | 7.0  | -2.6  |
| RBM45    | 1  | 30.9 | 22.9 | 8.0  | 15.0  |
| PDIA4    | 0  | 7.1  | 3.5  | 3.6  | -0.2  |
| TMEM237  | 7  | 15.2 | 1.5  | 13.7 | -12.2 |
| FZD7     | 0  | 6.6  | 2.7  | 3.9  | -1.3  |
| RNF20    | 1  | 20.0 | 16.6 | 3.4  | 13.2  |
| MED7     | 0  | 12.4 | 3.7  | 8.7  | -4.9  |
| RRAGA    | 0  | 8.9  | 4.3  | 4.6  | -0.3  |
| RMND1    | 1  | 12.2 | 8.1  | 4.1  | 4.0   |
| VBP1     | 1  | 62.8 | 56.5 | 6.3  | 50.1  |
| VPS37A   | 0  | 5.9  | 1.9  | 3.9  | -2.0  |
| CARNMT1  | 1  | 11.6 | 8.2  | 3.4  | 4.8   |
| MCU      | 7  | 10.0 | 0.7  | 9.3  | -8.6  |
| ELMSAN1  | 0  | 6.6  | 3.2  | 3.4  | -0.1  |
| FAM161B  | 0  | 9.0  | 3.9  | 5.1  | -1.2  |
| GNAQ     | 1  | 7.9  | 5.2  | 2.7  | 2.4   |
| ADK      | 0  | 11.3 | 3.3  | 8.0  | -4.7  |
| DCK      | 1  | 21.2 | 15.2 | 6.1  | 9.1   |
| DPY19L4  | 1  | 45.4 | 38.8 | 6.7  | 32.1  |
| NDUF6F6  | 0  | 7.4  | 2.0  | 5.3  | -3.3  |
| DRAM2    | 1  | 19.1 | 15.9 | 3.2  | 12.8  |
| N6AMT1   | 2  | 16.5 | 5.7  | 10.8 | -5.2  |
| RWDD2B   | 0  | 7.0  | 3.0  | 4.0  | -1.1  |
| USP16    | 1  | 51.6 | 45.6 | 6.1  | 39.5  |

|           |    |      |      |      |       |
|-----------|----|------|------|------|-------|
| CCT8      | 1  | 71.6 | 65.7 | 5.9  | 59.7  |
| BACH1     | 1  | 16.7 | 14.3 | 2.4  | 11.9  |
| TSPAN7    | 0  | 8.6  | 3.1  | 5.5  | -2.4  |
| SCAF4     | 0  | 10.5 | 4.0  | 6.5  | -2.5  |
| RPGR      | 1  | 22.9 | 17.6 | 5.3  | 12.3  |
| PCGF6     | 1  | 19.9 | 12.6 | 7.4  | 5.2   |
| ANKRD9    | 2  | 45.0 | 24.6 | 20.4 | 4.1   |
| SFR1      | 0  | 9.5  | 3.0  | 6.5  | -3.5  |
| SFXN2     | 0  | 15.4 | 6.1  | 9.3  | -3.2  |
| C14orf2   | 1  | 22.9 | 16.7 | 6.2  | 10.5  |
| SH3RF2    | 3  | 8.0  | 2.4  | 5.6  | -3.2  |
| UQCRB     | 1  | 44.1 | 40.0 | 4.1  | 35.9  |
| MTERF3    | 1  | 12.4 | 7.9  | 4.5  | 3.4   |
| PTDSS1    | 13 | 10.4 | 1.5  | 8.9  | -7.4  |
| RPL30     | 13 | 9.4  | 0.8  | 8.6  | -7.8  |
| SUPV3L1   | 6  | 14.8 | 2.4  | 12.4 | -10.0 |
| FAM122B   | 0  | 9.9  | 2.3  | 7.6  | -5.3  |
| EEF1A1    | 1  | 13.5 | 8.2  | 5.2  | 3.0   |
| HKDC1     | 0  | 12.7 | 5.7  | 7.0  | -1.4  |
| HK1       | 0  | 8.9  | 2.7  | 6.2  | -3.4  |
| TYSND1    | 2  | 27.1 | 13.7 | 13.4 | 0.3   |
| PHF6      | 1  | 36.6 | 31.9 | 4.7  | 27.2  |
| CD109     | 1  | 12.6 | 6.6  | 6.0  | 0.7   |
| UBE2L6    | 3  | 7.5  | 2.7  | 4.8  | -2.1  |
| ZDHC5     | 0  | 7.8  | 3.5  | 4.3  | -0.8  |
| MED19     | 2  | 16.3 | 6.1  | 10.2 | -4.1  |
| ZFAND3    | 0  | 13.3 | 6.8  | 6.5  | 0.2   |
| NPTN      | 1  | 14.8 | 11.2 | 3.6  | 7.6   |
| RAB11FIP1 | 0  | 7.8  | 2.8  | 5.0  | -2.2  |
| UTP14A    | 0  | 8.4  | 3.5  | 5.0  | -1.5  |
| AIFM1     | 0  | 11.8 | 3.8  | 8.0  | -4.2  |
| MAPK13    | 0  | 7.5  | 3.1  | 4.5  | -1.4  |
| TBC1D31   | 13 | 9.6  | 0.9  | 8.7  | -7.8  |
| WDYHV1    | 0  | 6.7  | 2.0  | 4.7  | -2.6  |
| ATAD2     | 7  | 38.7 | 6.4  | 32.3 | -26.0 |
| FBXO32    | 3  | 13.6 | 7.2  | 6.5  | 0.7   |
| NSMCE2    | 0  | 7.3  | 2.4  | 5.0  | -2.6  |
| ZNF689    | 11 | 29.9 | 4.5  | 25.4 | -20.9 |
| PRR14     | 11 | 15.7 | 3.2  | 12.5 | -9.4  |
| FBRS      | 11 | 19.8 | 5.5  | 14.2 | -8.7  |
| FRRS1     | 4  | 12.3 | 3.4  | 8.9  | -5.6  |
| PHKG2     | 11 | 23.7 | 5.4  | 18.2 | -12.8 |
| MFSD14A   | 1  | 25.3 | 22.3 | 3.0  | 19.2  |
| MALSU1    | 0  | 9.0  | 3.0  | 6.0  | -3.0  |
| VPS8      | 1  | 24.4 | 20.7 | 3.7  | 17.0  |
| GALK2     | 0  | 9.4  | 2.6  | 6.9  | -4.3  |
| BUB1B     | 7  | 48.6 | 7.7  | 40.8 | -33.1 |
| PDE6D     | 3  | 8.7  | 2.5  | 6.2  | -3.8  |
| EIF4A2    | 1  | 83.4 | 80.0 | 3.5  | 76.5  |
| BRPF1     | 2  | 19.6 | 8.2  | 11.4 | -3.3  |
| RPUSD3    | 2  | 18.8 | 6.5  | 12.4 | -5.9  |
| TATDN2    | 0  | 13.5 | 5.8  | 7.7  | -2.0  |
| SEC13     | 0  | 9.1  | 4.7  | 4.4  | 0.2   |
| EXOG      | 0  | 5.7  | 1.9  | 3.8  | -1.9  |

|          |    |      |      |      |       |
|----------|----|------|------|------|-------|
| NTAN1    | 0  | 9.6  | 2.4  | 7.3  | -4.9  |
| ZFYVE9   | 0  | 12.7 | 5.0  | 7.7  | -2.7  |
| SMG1     | 1  | 31.0 | 27.6 | 3.4  | 24.3  |
| FCHO2    | 1  | 20.9 | 17.6 | 3.3  | 14.3  |
| RBPMS    | 0  | 5.1  | 2.2  | 2.9  | -0.7  |
| NRG1     | 3  | 10.5 | 4.4  | 6.1  | -1.7  |
| C1orf27  | 1  | 32.8 | 28.1 | 4.7  | 23.5  |
| CPT2     | 2  | 36.2 | 18.9 | 17.3 | 1.6   |
| NECAP2   | 0  | 18.4 | 6.7  | 11.7 | -4.9  |
| LRP8     | 0  | 8.8  | 2.5  | 6.3  | -3.8  |
| PAXIP1   | 0  | 9.3  | 2.7  | 6.6  | -4.0  |
| SSBP3    | 0  | 7.4  | 3.8  | 3.6  | 0.1   |
| CLDN12   | 1  | 15.6 | 12.7 | 3.0  | 9.7   |
| MMP14    | 3  | 9.0  | 2.8  | 6.3  | -3.5  |
| GATAD1   | 0  | 5.8  | 2.2  | 3.6  | -1.4  |
| DHRS4    | 2  | 15.2 | 6.3  | 8.9  | -2.6  |
| DDX19B   | 2  | 20.9 | 8.9  | 12.0 | -3.1  |
| ST3GAL2  | 0  | 11.1 | 5.1  | 6.0  | -0.9  |
| FUK      | 2  | 42.5 | 22.8 | 19.7 | 3.1   |
| DHRS1    | 2  | 16.3 | 6.1  | 10.2 | -4.1  |
| ARSE     | 4  | 6.8  | 1.9  | 4.9  | -3.0  |
| RNF111   | 1  | 14.6 | 11.2 | 3.4  | 7.8   |
| CCNB2    | 5  | 15.6 | 8.5  | 7.1  | 1.4   |
| MYO1E    | 0  | 10.0 | 2.7  | 7.3  | -4.6  |
| APPL1    | 1  | 40.8 | 35.5 | 5.2  | 30.3  |
| TSC22D3  | 0  | 5.6  | 2.9  | 2.8  | 0.1   |
| DSCR3    | 0  | 6.0  | 2.9  | 3.1  | -0.3  |
| DYRK1A   | 0  | 9.4  | 3.8  | 5.6  | -1.8  |
| ETS2     | 0  | 6.6  | 2.9  | 3.7  | -0.9  |
| SLC35B2  | 11 | 22.6 | 1.4  | 21.2 | -19.8 |
| TMEM164  | 0  | 10.3 | 4.0  | 6.3  | -2.2  |
| C2CD2    | 0  | 9.1  | 4.2  | 4.9  | -0.7  |
| TAB3     | 1  | 8.2  | 5.1  | 3.1  | 1.9   |
| SLC38A10 | 0  | 16.4 | 6.4  | 10.0 | -3.6  |
| ZNF618   | 0  | 15.4 | 7.1  | 8.4  | -1.3  |
| C9orf91  | 0  | 10.1 | 5.3  | 4.8  | 0.6   |
| BRAF     | 1  | 13.2 | 8.3  | 4.9  | 3.4   |
| PSMG3    | 2  | 19.8 | 8.0  | 11.8 | -3.8  |
| WDR19    | 1  | 19.7 | 15.9 | 3.8  | 12.0  |
| SLC37A3  | 1  | 8.8  | 5.8  | 3.0  | 2.8   |
| AP3S2    | 0  | 9.7  | 4.4  | 5.3  | -1.0  |
| FMNL2    | 1  | 13.3 | 10.1 | 3.3  | 6.8   |
| SPPL3    | 0  | 7.6  | 3.7  | 3.8  | -0.1  |
| RAB28    | 1  | 9.7  | 5.5  | 4.2  | 1.3   |
| FAM213B  | 2  | 23.7 | 7.9  | 15.8 | -7.9  |
| TNFRSF14 | 2  | 13.5 | 3.9  | 9.6  | -5.8  |
| PANK4    | 2  | 21.2 | 8.5  | 12.7 | -4.2  |
| C12orf43 | 4  | 38.6 | 8.5  | 30.1 | -21.6 |
| PEX10    | 2  | 32.8 | 16.4 | 16.5 | -0.1  |
| RER1     | 0  | 8.9  | 4.1  | 4.8  | -0.7  |
| SKI      | 0  | 13.5 | 6.5  | 7.0  | -0.5  |
| WIPI2    | 2  | 15.5 | 5.0  | 10.5 | -5.5  |
| LDLRAP1  | 0  | 15.3 | 6.1  | 9.2  | -3.1  |
| AGAP1    | 0  | 8.2  | 3.9  | 4.3  | -0.3  |

|           |    |      |      |      |       |
|-----------|----|------|------|------|-------|
| PAFAH2    | 0  | 6.2  | 2.9  | 3.3  | -0.4  |
| BRE       | 0  | 12.4 | 4.6  | 7.8  | -3.2  |
| MRPL17    | 6  | 15.3 | 5.6  | 9.7  | -4.1  |
| UBXN11    | 3  | 14.9 | 4.4  | 10.5 | -6.2  |
| NCK1      | 1  | 33.5 | 29.5 | 4.0  | 25.4  |
| TPRG1L    | 2  | 20.9 | 8.6  | 12.4 | -3.8  |
| AAED1     | 7  | 12.4 | 1.0  | 11.4 | -10.3 |
| CNNM4     | 2  | 13.0 | 4.3  | 8.7  | -4.4  |
| EYA3      | 0  | 8.1  | 3.8  | 4.2  | -0.4  |
| FANCC     | 10 | 10.9 | 1.3  | 9.7  | -8.4  |
| MRAS      | 0  | 9.3  | 4.5  | 4.9  | -0.4  |
| WASF2     | 3  | 12.7 | 3.4  | 9.2  | -5.8  |
| ABHD3     | 4  | 11.6 | 4.6  | 7.0  | -2.3  |
| FAIM      | 1  | 15.6 | 10.6 | 5.0  | 5.6   |
| RNF207    | 0  | 9.0  | 4.0  | 5.1  | -1.1  |
| CUL4B     | 1  | 26.9 | 21.8 | 5.1  | 16.7  |
| HIST1H2BI | 0  | 6.5  | 3.7  | 2.8  | 0.9   |
| CDC25C    | 5  | 14.5 | 3.5  | 10.9 | -7.4  |
| MITD1     | 1  | 32.0 | 28.1 | 3.9  | 24.3  |
| EIF5B     | 1  | 69.8 | 61.5 | 8.3  | 53.2  |
| CNOT11    | 1  | 10.3 | 5.0  | 5.3  | -0.3  |
| TSPAN33   | 4  | 11.0 | 3.8  | 7.2  | -3.4  |
| AHCYL2    | 0  | 5.5  | 2.4  | 3.1  | -0.7  |
| B4GALT5   | 0  | 5.2  | 2.3  | 2.9  | -0.7  |
| SPATA2    | 2  | 44.7 | 24.1 | 20.6 | 3.6   |
| FAM86C1   | 2  | 17.3 | 7.0  | 10.3 | -3.4  |
| TSR2      | 0  | 7.7  | 4.2  | 3.4  | 0.8   |
| ZC3H18    | 2  | 17.4 | 6.2  | 11.2 | -5.0  |
| ZFAND2B   | 0  | 11.9 | 4.7  | 7.2  | -2.5  |
| GDPD5     | 0  | 6.8  | 3.5  | 3.2  | 0.3   |
| TMED4     | 0  | 12.1 | 5.2  | 6.8  | -1.6  |
| PPP1R15B  | 1  | 9.3  | 4.9  | 4.4  | 0.5   |
| COPG2     | 0  | 6.9  | 3.2  | 3.8  | -0.6  |
| EMSY      | 0  | 8.2  | 2.9  | 5.3  | -2.3  |
| GPAT4     | 6  | 11.8 | 3.6  | 8.2  | -4.6  |
| TAGLN2    | 3  | 8.5  | 3.2  | 5.3  | -2.0  |
| ELK4      | 1  | 11.3 | 7.2  | 4.1  | 3.0   |
| DUSP23    | 3  | 21.8 | 8.2  | 13.5 | -5.3  |
| RNF166    | 0  | 13.6 | 6.0  | 7.6  | -1.6  |
| NBL1      | 0  | 9.7  | 4.1  | 5.6  | -1.6  |
| F11R      | 4  | 16.5 | 8.4  | 8.1  | 0.3   |
| USF1      | 9  | 17.9 | 2.8  | 15.1 | -12.3 |
| SPATA2L   | 2  | 31.1 | 14.2 | 16.9 | -2.7  |
| NIT1      | 9  | 14.3 | 2.1  | 12.2 | -10.1 |
| DEDD      | 9  | 11.0 | 2.7  | 8.2  | -5.5  |
| ZNF276    | 0  | 10.9 | 5.0  | 5.8  | -0.8  |
| CDA       | 0  | 8.9  | 3.8  | 5.2  | -1.4  |
| PINK1     | 0  | 16.7 | 7.1  | 9.6  | -2.5  |
| B4GALT3   | 9  | 11.6 | 2.9  | 8.6  | -5.7  |
| DMTN      | 2  | 17.8 | 6.4  | 11.4 | -5.0  |
| FAM160B2  | 0  | 10.5 | 5.6  | 4.9  | 0.8   |
| NDUFS2    | 9  | 10.2 | 2.3  | 8.0  | -5.7  |
| APOA2     | 4  | 23.1 | 14.2 | 8.8  | 5.4   |
| TOMM40L   | 4  | 41.1 | 12.0 | 29.1 | -17.2 |

|          |    |      |      |      |       |
|----------|----|------|------|------|-------|
| CCAR2    | 0  | 7.8  | 3.9  | 3.9  | 0.1   |
| CDC42SE2 | 1  | 10.6 | 6.0  | 4.5  | 1.5   |
| EPB41    | 4  | 14.0 | 3.7  | 10.3 | -6.6  |
| MIS18A   | 7  | 10.8 | 1.5  | 9.3  | -7.8  |
| ALG8     | 1  | 12.9 | 6.0  | 6.9  | -0.8  |
| FBXW5    | 10 | 29.6 | 6.4  | 23.2 | -16.8 |
| C21orf59 | 0  | 8.0  | 3.6  | 4.4  | -0.9  |
| PAXBP1   | 1  | 58.6 | 54.2 | 4.4  | 49.8  |
| IFNAR2   | 0  | 8.9  | 3.8  | 5.1  | -1.3  |
| MRPL10   | 2  | 17.2 | 6.1  | 11.1 | -5.0  |
| IFNGR2   | 3  | 12.7 | 3.9  | 8.7  | -4.8  |
| GART     | 0  | 10.3 | 3.1  | 7.2  | -4.1  |
| SON      | 1  | 55.3 | 51.5 | 3.8  | 47.7  |
| DONSON   | 7  | 20.3 | 2.5  | 17.8 | -15.3 |
| LAD1     | 0  | 17.0 | 6.0  | 11.0 | -5.0  |
| CSRP1    | 3  | 13.2 | 7.7  | 5.5  | 2.2   |
| ATP5G1   | 0  | 11.4 | 5.1  | 6.3  | -1.2  |
| RCAN1    | 0  | 6.2  | 2.3  | 3.9  | -1.7  |
| UBE2Z    | 0  | 12.6 | 5.6  | 7.0  | -1.5  |
| SNF8     | 5  | 9.1  | 2.4  | 6.7  | -4.3  |
| CCDC24   | 2  | 24.0 | 10.7 | 13.2 | -2.5  |
| RUNX1    | 3  | 15.9 | 8.5  | 7.4  | 1.1   |
| IGF2BP1  | 0  | 11.8 | 3.8  | 8.0  | -4.1  |
| CBR1     | 0  | 16.0 | 6.8  | 9.2  | -2.4  |
| CBR3     | 3  | 10.5 | 3.3  | 7.2  | -3.9  |
| MORC3    | 1  | 29.8 | 25.6 | 4.2  | 21.4  |
| CHAF1B   | 0  | 14.1 | 5.2  | 8.8  | -3.6  |
| HLCS     | 0  | 8.1  | 4.0  | 4.1  | -0.1  |
| ARHGAP27 | 2  | 22.5 | 9.1  | 13.3 | -4.2  |
| ADPGK    | 0  | 8.6  | 4.2  | 4.3  | -0.1  |
| PTMS     | 0  | 7.2  | 2.3  | 4.9  | -2.6  |
| ADIPOR1  | 0  | 9.7  | 4.2  | 5.5  | -1.3  |
| CYB5R1   | 9  | 17.0 | 1.4  | 15.6 | -14.2 |
| PSMD4    | 9  | 14.6 | 4.8  | 9.9  | -5.1  |
| ATP13A2  | 3  | 11.9 | 4.3  | 7.7  | -3.4  |
| PSMB4    | 9  | 15.2 | 3.9  | 11.3 | -7.4  |
| HK2      | 0  | 9.7  | 4.7  | 5.1  | -0.4  |
| C1R      | 3  | 14.7 | 5.8  | 8.9  | -3.1  |
| ALDH4A1  | 4  | 17.8 | 7.1  | 10.7 | -3.6  |
| THEM4    | 9  | 8.5  | 2.2  | 6.3  | -4.1  |
| UBR1     | 1  | 17.8 | 15.1 | 2.7  | 12.3  |
| AMFR     | 6  | 9.6  | 2.2  | 7.4  | -5.2  |
| MED8     | 0  | 11.8 | 5.5  | 6.3  | -0.8  |
| RSPRY1   | 1  | 12.8 | 9.3  | 3.5  | 5.8   |
| GPBP1L1  | 1  | 56.6 | 51.7 | 4.9  | 46.7  |
| NAE1     | 1  | 71.1 | 62.3 | 8.8  | 53.4  |
| TMEM69   | 6  | 13.3 | 2.0  | 11.3 | -9.2  |
| EFCAB14  | 1  | 21.3 | 17.0 | 4.2  | 12.8  |
| SPON2    | 0  | 10.6 | 4.7  | 5.9  | -1.3  |
| CHCHD6   | 2  | 18.7 | 7.6  | 11.0 | -3.4  |
| CTBP1    | 0  | 10.7 | 4.8  | 5.9  | -1.2  |
| ATP6VOD1 | 0  | 12.4 | 5.0  | 7.4  | -2.4  |
| RGS12    | 1  | 10.9 | 5.4  | 5.5  | -0.2  |
| PSKH1    | 2  | 27.7 | 12.0 | 15.7 | -3.7  |

|           |    |      |      |      |       |
|-----------|----|------|------|------|-------|
| ZYX       | 3  | 20.1 | 13.1 | 7.0  | 6.1   |
| ABR       | 0  | 7.2  | 2.0  | 5.2  | -3.2  |
| CCDC117   | 0  | 11.5 | 4.0  | 7.5  | -3.4  |
| CCDC107   | 2  | 18.6 | 5.8  | 12.8 | -7.0  |
| ZNF235    | 1  | 14.9 | 11.4 | 3.5  | 7.9   |
| GNE       | 0  | 7.2  | 3.3  | 3.9  | -0.6  |
| ARHGAP35  | 0  | 10.3 | 5.1  | 5.2  | -0.2  |
| CALM3     | 0  | 6.8  | 2.9  | 3.9  | -0.9  |
| DFFA      | 0  | 14.6 | 6.2  | 8.3  | -2.1  |
| CCDC28B   | 2  | 18.1 | 6.2  | 11.9 | -5.7  |
| TMEM234   | 0  | 19.6 | 7.6  | 12.0 | -4.4  |
| BSDC1     | 0  | 13.1 | 6.1  | 7.0  | -1.0  |
| ATAD3B    | 2  | 15.2 | 5.3  | 9.9  | -4.6  |
| SSU72     | 0  | 12.6 | 5.4  | 7.2  | -1.8  |
| UBE2J2    | 0  | 16.3 | 6.8  | 9.6  | -2.8  |
| ZNF362    | 0  | 9.5  | 5.5  | 4.0  | 1.5   |
| NR2F6     | 4  | 25.8 | 7.6  | 18.1 | -10.5 |
| CCDC58    | 1  | 39.1 | 31.9 | 7.1  | 24.8  |
| VMA21     | 0  | 8.0  | 3.5  | 4.5  | -1.0  |
| WDR4      | 2  | 16.9 | 5.5  | 11.5 | -6.0  |
| NDUFV3    | 0  | 6.4  | 2.8  | 3.6  | -0.8  |
| PKNOX1    | 0  | 8.3  | 3.5  | 4.8  | -1.3  |
| CBS       | 2  | 17.6 | 6.3  | 11.3 | -5.0  |
| RRP1B     | 0  | 10.4 | 4.4  | 6.1  | -1.7  |
| PDXK      | 3  | 7.3  | 2.1  | 5.1  | -3.0  |
| G6PD      | 0  | 15.0 | 7.1  | 8.0  | -0.9  |
| CSTB      | 0  | 9.7  | 4.5  | 5.2  | -0.8  |
| RRP1      | 0  | 14.1 | 6.0  | 8.1  | -2.1  |
| AGPAT3    | 0  | 11.1 | 4.6  | 6.5  | -1.9  |
| TRAPPC10  | 1  | 14.2 | 9.2  | 5.0  | 4.2   |
| C21orf2   | 2  | 19.0 | 7.1  | 11.9 | -4.8  |
| FAM207A   | 2  | 23.3 | 10.2 | 13.2 | -3.0  |
| RALGDS    | 10 | 11.6 | 1.6  | 10.0 | -8.5  |
| SPATC1L   | 0  | 10.5 | 4.6  | 5.9  | -1.3  |
| LSS       | 0  | 9.6  | 3.6  | 6.0  | -2.5  |
| VAV2      | 10 | 19.9 | 2.9  | 17.0 | -14.1 |
| MCM3AP    | 0  | 7.0  | 3.5  | 3.5  | -0.1  |
| C21orf58  | 0  | 13.8 | 4.9  | 8.9  | -3.9  |
| PCNT      | 0  | 7.2  | 2.6  | 4.7  | -2.1  |
| DIP2A     | 8  | 9.0  | 1.1  | 7.9  | -6.8  |
| PRMT2     | 3  | 12.2 | 4.7  | 7.5  | -2.8  |
| CACFD1    | 4  | 20.8 | 6.7  | 14.1 | -7.4  |
| SLC2A6    | 10 | 14.3 | 1.5  | 12.8 | -11.4 |
| C9orf116  | 2  | 32.8 | 14.4 | 18.4 | -4.0  |
| GPSM1     | 10 | 18.7 | 1.3  | 17.4 | -16.1 |
| C19orf47  | 0  | 10.4 | 4.5  | 5.9  | -1.4  |
| TOR2A     | 2  | 26.2 | 11.3 | 15.0 | -3.7  |
| ST6GALNAC | 10 | 16.1 | 1.3  | 14.8 | -13.5 |
| SHKBP1    | 0  | 7.9  | 2.4  | 5.5  | -3.1  |
| RDH13     | 2  | 20.5 | 8.8  | 11.7 | -2.8  |
| ZER1      | 10 | 18.7 | 2.6  | 16.1 | -13.4 |
| ZDHC12    | 10 | 20.0 | 3.5  | 16.6 | -13.1 |
| PKN3      | 10 | 12.2 | 1.2  | 11.0 | -9.8  |
| TAOK1     | 1  | 37.8 | 32.3 | 5.5  | 26.8  |



|          |    |      |      |      |       |
|----------|----|------|------|------|-------|
| MED27    | 10 | 26.8 | 7.5  | 19.4 | -11.9 |
| DEDD2    | 2  | 15.0 | 5.6  | 9.4  | -3.7  |
| SIK3     | 0  | 10.2 | 5.3  | 5.0  | 0.3   |
| TLCD1    | 4  | 17.2 | 6.1  | 11.1 | -4.9  |
| PCSK7    | 0  | 8.6  | 4.0  | 4.6  | -0.7  |
| SAFB     | 8  | 11.2 | 2.4  | 8.7  | -6.3  |
| CHTOP    | 9  | 10.9 | 4.1  | 6.8  | -2.7  |
| ZBTB7B   | 9  | 20.1 | 3.8  | 16.3 | -12.5 |
| FLAD1    | 9  | 21.8 | 6.4  | 15.4 | -9.0  |
| SHC1     | 3  | 8.6  | 2.3  | 6.3  | -4.0  |
| VPS11    | 2  | 18.2 | 7.8  | 10.4 | -2.6  |
| NLRX1    | 2  | 33.3 | 17.0 | 16.3 | 0.7   |
| ADAR     | 9  | 13.6 | 3.0  | 10.6 | -7.6  |
| IL6R     | 4  | 13.0 | 3.1  | 9.8  | -6.7  |
| UBE2Q1   | 6  | 33.5 | 12.3 | 21.2 | -8.9  |
| CRTC2    | 9  | 8.9  | 1.2  | 7.6  | -6.4  |
| ANO10    | 3  | 11.8 | 5.3  | 6.5  | -1.3  |
| FDPS     | 9  | 11.9 | 1.2  | 10.7 | -9.5  |
| RUSC1    | 9  | 13.2 | 2.9  | 10.3 | -7.4  |
| FAM189B  | 9  | 19.8 | 4.6  | 15.2 | -10.6 |
| PMF1     | 0  | 16.9 | 3.9  | 12.9 | -9.0  |
| SLC25A44 | 9  | 10.9 | 2.7  | 8.2  | -5.5  |
| LMNA     | 3  | 13.4 | 7.0  | 6.5  | 0.5   |
| NBEAL2   | 4  | 15.8 | 4.4  | 11.4 | -7.0  |
| CCDC12   | 0  | 8.6  | 3.9  | 4.7  | -0.8  |
| UBQLN4   | 9  | 22.1 | 3.9  | 18.2 | -14.3 |
| PPP1R35  | 2  | 17.5 | 7.2  | 10.3 | -3.1  |
| GPATCH4  | 0  | 14.0 | 3.0  | 11.0 | -8.1  |
| FGFR4    | 4  | 19.3 | 10.9 | 8.4  | 2.5   |
| NACC1    | 8  | 16.5 | 3.8  | 12.7 | -8.9  |
| IER2     | 2  | 13.4 | 4.8  | 8.6  | -3.8  |
| ZNF394   | 0  | 7.1  | 3.1  | 4.0  | -0.9  |
| CPSF4    | 2  | 13.7 | 5.4  | 8.3  | -2.9  |
| LY6E     | 0  | 6.1  | 2.9  | 3.2  | -0.4  |
| VPS28    | 13 | 15.3 | 1.9  | 13.3 | -11.4 |
| TONSL    | 13 | 22.7 | 2.6  | 20.0 | -17.4 |
| MUM1     | 8  | 9.9  | 2.8  | 7.1  | -4.2  |
| RECQL4   | 5  | 15.5 | 7.0  | 8.5  | -1.6  |
| LRRC14   | 13 | 21.6 | 3.5  | 18.1 | -14.6 |
| PPP1R16A | 13 | 15.0 | 1.9  | 13.2 | -11.3 |
| ORAI2    | 3  | 15.3 | 6.2  | 9.1  | -2.9  |
| ALKBH4   | 2  | 35.9 | 19.4 | 16.5 | 2.9   |
| C5orf45  | 0  | 14.2 | 7.3  | 6.9  | 0.4   |
| SQSTM1   | 0  | 14.2 | 6.6  | 7.6  | -1.1  |
| MGAT4B   | 0  | 10.4 | 4.9  | 5.5  | -0.6  |
| RPL8     | 13 | 8.9  | 1.6  | 7.3  | -5.7  |
| MAML1    | 0  | 7.8  | 3.7  | 4.0  | -0.3  |
| LRWD1    | 2  | 25.5 | 11.5 | 14.0 | -2.5  |
| NAPEPLD  | 0  | 5.0  | 1.4  | 3.6  | -2.2  |
| PSMC2    | 1  | 21.0 | 17.4 | 3.5  | 13.9  |
| MFSD12   | 8  | 10.7 | 2.0  | 8.7  | -6.8  |
| YDJC     | 2  | 29.7 | 14.9 | 14.8 | 0.1   |
| DVL3     | 2  | 17.6 | 5.3  | 12.3 | -7.0  |
| AP2M1    | 3  | 9.0  | 2.7  | 6.3  | -3.6  |

|           |    |      |      |      |       |
|-----------|----|------|------|------|-------|
| ABCF3     | 0  | 11.7 | 4.8  | 6.8  | -2.0  |
| PCYT1A    | 0  | 7.7  | 3.3  | 4.3  | -1.0  |
| DMKN      | 0  | 8.6  | 3.1  | 5.4  | -2.3  |
| U2AF1L4   | 0  | 6.2  | 2.7  | 3.5  | -0.8  |
| PGAP3     | 2  | 30.6 | 13.0 | 17.6 | -4.6  |
| FDXR      | 0  | 9.7  | 4.0  | 5.7  | -1.7  |
| SAP30BP   | 0  | 6.9  | 2.8  | 4.1  | -1.3  |
| ACOX1     | 4  | 15.6 | 7.6  | 8.0  | -0.5  |
| PRPSAP1   | 5  | 7.5  | 1.5  | 6.0  | -4.5  |
| SRSF2     | 1  | 38.5 | 29.2 | 9.3  | 19.9  |
| TMEM143   | 2  | 17.1 | 6.8  | 10.3 | -3.5  |
| ALDH16A1  | 0  | 10.1 | 4.1  | 5.9  | -1.8  |
| ITGA5     | 3  | 17.4 | 10.2 | 7.2  | 3.0   |
| ZNF385A   | 2  | 12.8 | 4.2  | 8.5  | -4.3  |
| MPP3      | 9  | 7.4  | 0.8  | 6.6  | -5.8  |
| LSM12     | 0  | 7.8  | 2.8  | 5.0  | -2.2  |
| EMC10     | 0  | 9.5  | 4.3  | 5.2  | -1.0  |
| JOSD2     | 0  | 9.6  | 4.3  | 5.3  | -1.0  |
| DBF4B     | 5  | 15.6 | 3.6  | 12.0 | -8.3  |
| PLCD3     | 3  | 7.9  | 2.6  | 5.3  | -2.6  |
| FMNL3     | 3  | 11.6 | 3.3  | 8.4  | -5.1  |
| RACGAP1   | 5  | 25.7 | 12.6 | 13.2 | -0.6  |
| LARP4     | 1  | 47.8 | 40.8 | 7.0  | 33.8  |
| RAVER1    | 8  | 22.8 | 8.4  | 14.4 | -6.0  |
| SPC24     | 5  | 16.6 | 4.4  | 12.2 | -7.9  |
| LEMD2     | 3  | 9.2  | 2.6  | 6.6  | -4.0  |
| ZNF653    | 8  | 25.2 | 5.3  | 19.8 | -14.5 |
| MED11     | 4  | 20.0 | 5.9  | 14.1 | -8.3  |
| CXCL16    | 4  | 25.9 | 13.0 | 12.9 | 0.1   |
| RNASEK-C1 | 6  | 19.0 | 6.0  | 13.1 | -7.1  |
| SEN3      | 6  | 18.0 | 3.4  | 14.6 | -11.3 |
| EIF4A1    | 1  | 15.8 | 8.4  | 7.3  | 1.1   |
| RPL26     | 1  | 25.0 | 20.5 | 4.5  | 16.0  |
| POLR3K    | 12 | 21.2 | 2.8  | 18.4 | -15.5 |
| SNRNP25   | 5  | 10.1 | 2.0  | 8.1  | -6.1  |
| WDR90     | 12 | 9.7  | 1.6  | 8.1  | -6.4  |
| JMJD8     | 0  | 11.0 | 4.5  | 6.5  | -1.9  |
| SPSB3     | 12 | 12.2 | 1.3  | 10.9 | -9.7  |
| C16orf59  | 12 | 22.3 | 3.0  | 19.3 | -16.3 |
| CCNF      | 5  | 20.5 | 4.0  | 16.4 | -12.4 |
| TBC1D24   | 0  | 8.7  | 4.3  | 4.4  | -0.2  |
| AMDHD2    | 12 | 13.8 | 1.7  | 12.1 | -10.4 |
| PAQR4     | 12 | 14.4 | 2.3  | 12.0 | -9.7  |
| FLYWCH2   | 0  | 8.9  | 4.3  | 4.6  | -0.2  |
| ZG16B     | 2  | 16.4 | 4.1  | 12.2 | -8.1  |
| ZNF75A    | 1  | 7.2  | 4.4  | 2.8  | 1.6   |
| ADCY9     | 0  | 9.2  | 3.9  | 5.4  | -1.5  |
| CLPB      | 0  | 14.7 | 6.0  | 8.7  | -2.8  |
| CYB561A3  | 0  | 14.5 | 5.3  | 9.2  | -3.9  |
| ASRGL1    | 0  | 14.3 | 4.1  | 10.2 | -6.0  |
| UBXN1     | 0  | 12.5 | 5.3  | 7.2  | -1.9  |
| TTC9C     | 0  | 10.2 | 4.1  | 6.1  | -2.0  |
| TAF6L     | 2  | 16.2 | 6.0  | 10.2 | -4.2  |
| NXF1      | 0  | 11.7 | 5.6  | 6.1  | -0.5  |

|          |   |      |      |      |       |
|----------|---|------|------|------|-------|
| STX5     | 2 | 19.2 | 7.1  | 12.1 | -5.0  |
| RPL29    | 8 | 16.8 | 2.4  | 14.4 | -12.0 |
| SYVN1    | 0 | 13.5 | 5.5  | 8.0  | -2.6  |
| ZFPL1    | 0 | 7.3  | 3.5  | 3.8  | -0.3  |
| RPS6KA4  | 0 | 18.6 | 6.0  | 12.6 | -6.7  |
| LRP5     | 4 | 10.0 | 2.6  | 7.3  | -4.7  |
| TPCN2    | 0 | 6.0  | 2.7  | 3.2  | -0.5  |
| CMPK1    | 1 | 83.8 | 79.7 | 4.1  | 75.6  |
| COA7     | 0 | 15.8 | 6.2  | 9.6  | -3.3  |
| C1orf123 | 0 | 8.4  | 4.3  | 4.1  | 0.2   |
| MAGOH    | 1 | 38.2 | 30.3 | 7.9  | 22.4  |
| USP24    | 1 | 37.8 | 32.7 | 5.1  | 27.6  |
| PLPP3    | 0 | 7.6  | 3.4  | 4.2  | -0.7  |
| NOL9     | 0 | 9.6  | 4.8  | 4.8  | 0.0   |
| KLHL21   | 0 | 15.0 | 5.4  | 9.6  | -4.2  |
| GMEB1    | 2 | 15.6 | 5.4  | 10.2 | -4.8  |
| SEPN1    | 0 | 13.3 | 5.6  | 7.7  | -2.0  |
| AK4      | 4 | 8.2  | 2.2  | 5.9  | -3.7  |
| JAK1     | 1 | 17.3 | 11.6 | 5.7  | 5.9   |
| LZIC     | 1 | 12.4 | 5.9  | 6.5  | -0.6  |
| FBLIM1   | 0 | 7.0  | 3.4  | 3.6  | -0.3  |
| DHRS3    | 4 | 11.5 | 3.6  | 7.9  | -4.3  |
| SDC3     | 3 | 20.8 | 9.7  | 11.1 | -1.4  |
| PEF1     | 2 | 15.3 | 5.1  | 10.2 | -5.1  |
| SYNC     | 0 | 11.3 | 3.1  | 8.1  | -5.0  |
| RBBP4    | 1 | 9.7  | 5.9  | 3.9  | 2.0   |
| KIAA1522 | 0 | 16.3 | 5.7  | 10.5 | -4.8  |
| TMC04    | 2 | 22.1 | 9.0  | 13.1 | -4.1  |
| CAMK2N1  | 0 | 8.3  | 3.7  | 4.6  | -1.0  |
| MXRA8    | 0 | 7.3  | 2.7  | 4.6  | -1.9  |
| FAAP20   | 2 | 18.6 | 6.4  | 12.1 | -5.7  |
| OMA1     | 1 | 23.0 | 17.4 | 5.6  | 11.7  |
| MYSM1    | 1 | 32.4 | 28.9 | 3.5  | 25.4  |
| TM2D1    | 1 | 22.9 | 18.6 | 4.4  | 14.2  |
| USP1     | 7 | 59.6 | 8.8  | 50.8 | -41.9 |
| FUBP1    | 1 | 28.1 | 24.9 | 3.2  | 21.7  |
| DNAJB4   | 1 | 25.9 | 21.6 | 4.3  | 17.2  |
| TYW3     | 1 | 33.5 | 26.9 | 6.6  | 20.4  |
| SNX7     | 1 | 10.3 | 6.1  | 4.2  | 1.9   |
| C1orf52  | 0 | 7.9  | 2.5  | 5.5  | -3.0  |
| GBP2     | 0 | 9.1  | 4.2  | 4.9  | -0.6  |
| ZNF326   | 1 | 52.1 | 46.3 | 5.8  | 40.4  |
| EXTL2    | 1 | 23.6 | 19.6 | 4.1  | 15.5  |
| SLC30A7  | 1 | 12.5 | 8.5  | 4.0  | 4.4   |
| ZNF281   | 1 | 17.2 | 13.8 | 3.4  | 10.4  |
| ARPC5    | 3 | 13.5 | 6.1  | 7.4  | -1.3  |
| ZNF496   | 0 | 12.7 | 6.0  | 6.7  | -0.7  |
| IGSF8    | 9 | 18.9 | 2.0  | 16.9 | -14.9 |
| PEA15    | 3 | 25.6 | 17.3 | 8.4  | 8.9   |
| PEX19    | 9 | 12.9 | 2.9  | 10.0 | -7.1  |
| NCSTN    | 9 | 11.3 | 1.2  | 10.1 | -8.9  |
| FLVCR1   | 0 | 15.5 | 4.3  | 11.2 | -6.9  |
| ATF3     | 0 | 6.7  | 2.7  | 4.0  | -1.3  |
| RBM15    | 0 | 8.8  | 3.2  | 5.7  | -2.5  |

|          |   |      |      |      |       |
|----------|---|------|------|------|-------|
| IER5     | 0 | 15.2 | 4.9  | 10.3 | -5.3  |
| BPNT1    | 0 | 13.0 | 4.1  | 8.9  | -4.8  |
| C1orf115 | 4 | 22.7 | 12.1 | 10.5 | 1.6   |
| BROX     | 1 | 15.4 | 11.5 | 3.9  | 7.6   |
| ACP6     | 0 | 12.8 | 5.2  | 7.6  | -2.4  |
| TFB2M    | 1 | 15.8 | 10.5 | 5.3  | 5.2   |
| CNST     | 0 | 6.4  | 1.9  | 4.5  | -2.6  |
| PPP1R21  | 0 | 10.3 | 3.3  | 7.0  | -3.7  |
| PKDCC    | 4 | 14.0 | 4.9  | 9.2  | -4.3  |
| B3GALNT2 | 1 | 11.2 | 7.4  | 3.8  | 3.6   |
| MAPKAPK2 | 3 | 30.6 | 18.8 | 11.8 | 7.0   |
| CAPN2    | 3 | 21.0 | 13.9 | 7.0  | 6.9   |
| MRPL55   | 0 | 9.9  | 3.7  | 6.2  | -2.5  |
| WDR26    | 1 | 12.7 | 9.4  | 3.3  | 6.1   |
| PEX13    | 1 | 16.3 | 11.8 | 4.5  | 7.3   |
| KIAA1841 | 1 | 13.8 | 9.8  | 4.0  | 5.7   |
| MEMO1    | 0 | 7.8  | 3.0  | 4.8  | -1.8  |
| DPY30    | 1 | 14.8 | 10.0 | 4.8  | 5.2   |
| C2orf47  | 1 | 18.9 | 8.8  | 10.1 | -1.3  |
| PQLC3    | 0 | 8.4  | 3.9  | 4.4  | -0.5  |
| ARL5A    | 1 | 26.6 | 22.8 | 3.8  | 19.1  |
| CFAP36   | 1 | 20.9 | 15.2 | 5.7  | 9.5   |
| NUP35    | 1 | 45.7 | 34.4 | 11.3 | 23.1  |
| CCDC138  | 1 | 27.3 | 17.8 | 9.5  | 8.3   |
| C2orf44  | 0 | 9.8  | 2.9  | 7.0  | -4.1  |
| SMC6     | 1 | 36.7 | 30.7 | 6.0  | 24.7  |
| H3F3A    | 0 | 7.3  | 3.3  | 4.0  | -0.7  |
| ADCK3    | 4 | 20.1 | 5.2  | 14.9 | -9.8  |
| SGCB     | 1 | 10.0 | 5.8  | 4.3  | 1.5   |
| SMARCAD1 | 1 | 38.0 | 34.0 | 4.0  | 30.0  |
| PDLIM5   | 0 | 8.2  | 3.6  | 4.6  | -1.1  |
| RPRD2    | 9 | 14.5 | 5.6  | 8.9  | -3.3  |
| CTSS     | 0 | 11.4 | 4.9  | 6.5  | -1.7  |
| PACRGL   | 1 | 13.0 | 7.2  | 5.8  | 1.5   |
| LYSD1    | 9 | 19.8 | 3.6  | 16.2 | -12.5 |
| SCNM1    | 9 | 13.4 | 5.5  | 7.9  | -2.4  |
| VPS72    | 9 | 10.7 | 2.7  | 8.0  | -5.3  |
| ERCC3    | 0 | 8.6  | 3.4  | 5.2  | -1.9  |
| RNF149   | 0 | 7.4  | 2.5  | 4.9  | -2.4  |
| IWS1     | 1 | 20.7 | 17.5 | 3.2  | 14.2  |
| BOLA3    | 0 | 10.6 | 3.8  | 6.9  | -3.1  |
| CDC42EP3 | 3 | 26.5 | 13.8 | 12.7 | 1.1   |
| S100A11  | 0 | 5.1  | 2.4  | 2.7  | -0.4  |
| DHX57    | 1 | 34.9 | 27.3 | 7.6  | 19.7  |
| CCNYL1   | 1 | 12.7 | 7.1  | 5.5  | 1.6   |
| FZD5     | 4 | 16.2 | 7.9  | 8.3  | -0.4  |
| DCAF16   | 0 | 11.4 | 4.0  | 7.5  | -3.5  |
| GNPDA2   | 1 | 16.5 | 11.8 | 4.6  | 7.2   |
| PAQR3    | 1 | 19.8 | 15.8 | 4.0  | 11.8  |
| ANTXR2   | 0 | 9.6  | 4.3  | 5.2  | -0.9  |
| MRPS18C  | 6 | 65.9 | 13.1 | 52.7 | -39.6 |
| CGGBP1   | 1 | 29.4 | 26.0 | 3.4  | 22.5  |
| FAM175A  | 1 | 17.5 | 12.9 | 4.6  | 8.3   |
| PMVK     | 9 | 20.4 | 3.1  | 17.3 | -14.2 |

|          |   |       |       |      |       |
|----------|---|-------|-------|------|-------|
| PBXIP1   | 0 | 15.3  | 7.3   | 8.0  | -0.7  |
| CLDN1    | 4 | 8.7   | 2.7   | 6.0  | -3.3  |
| PYGO2    | 9 | 18.4  | 4.9   | 13.5 | -8.6  |
| HIPK1    | 1 | 14.0  | 9.5   | 4.5  | 5.0   |
| COL6A3   | 3 | 13.5  | 6.9   | 6.6  | 0.2   |
| Clorf106 | 4 | 15.5  | 6.6   | 8.9  | -2.3  |
| YY1AP1   | 9 | 11.4  | 4.3   | 7.1  | -2.8  |
| EOGT     | 1 | 14.7  | 11.5  | 3.2  | 8.4   |
| APOA1BP  | 9 | 19.5  | 3.8   | 15.7 | -11.9 |
| POGLUT1  | 0 | 9.1   | 3.4   | 5.7  | -2.3  |
| ATP1A1   | 4 | 10.4  | 3.3   | 7.1  | -3.8  |
| LRRC58   | 1 | 42.7  | 36.6  | 6.1  | 30.5  |
| FSTL1    | 3 | 21.4  | 8.9   | 12.5 | -3.5  |
| ELF3     | 4 | 21.4  | 9.7   | 11.7 | -2.0  |
| TMEM183A | 0 | 10.3  | 4.1   | 6.2  | -2.1  |
| IGFBP7   | 0 | 11.1  | 2.3   | 8.8  | -6.6  |
| KRTCAP2  | 9 | 8.9   | 2.3   | 6.6  | -4.2  |
| ARPC2    | 1 | 15.6  | 7.9   | 7.7  | 0.2   |
| CCT3     | 5 | 16.9  | 4.8   | 12.0 | -7.2  |
| SSR2     | 9 | 12.4  | 2.7   | 9.7  | -7.0  |
| RNF25    | 6 | 14.0  | 5.0   | 9.1  | -4.1  |
| STK36    | 0 | 7.4   | 2.9   | 4.5  | -1.6  |
| KIAA1524 | 7 | 38.4  | 7.0   | 31.4 | -24.4 |
| CWC22    | 1 | 45.4  | 37.6  | 7.8  | 29.9  |
| AZI2     | 1 | 63.6  | 56.0  | 7.7  | 48.3  |
| TGFBR2   | 0 | 7.8   | 3.5   | 4.3  | -0.8  |
| ANKZF1   | 0 | 6.2   | 2.9   | 3.3  | -0.4  |
| HDAC11   | 0 | 11.1  | 5.1   | 6.0  | -0.9  |
| GLB1L    | 0 | 7.7   | 3.5   | 4.2  | -0.7  |
| STT3B    | 1 | 113.3 | 107.1 | 6.3  | 100.8 |
| CHCHD4   | 0 | 16.7  | 7.0   | 9.8  | -2.8  |
| SGOL2    | 7 | 36.8  | 8.0   | 28.8 | -20.7 |
| CLASP2   | 1 | 44.8  | 37.7  | 7.1  | 30.6  |
| SUCLG1   | 0 | 11.8  | 4.1   | 7.6  | -3.5  |
| NUAK2    | 3 | 11.2  | 3.9   | 7.3  | -3.3  |
| PRKCI    | 1 | 70.0  | 60.0  | 10.0 | 50.1  |
| IFI16    | 3 | 17.0  | 8.7   | 8.3  | 0.3   |
| EIF5A2   | 0 | 6.0   | 1.6   | 4.4  | -2.8  |
| RPL22L1  | 1 | 13.1  | 6.8   | 6.2  | 0.6   |
| FABP1    | 4 | 25.6  | 15.8  | 9.8  | 6.1   |
| RYBP     | 1 | 20.2  | 15.9  | 4.3  | 11.6  |
| PPP4R2   | 1 | 84.3  | 77.0  | 7.3  | 69.7  |
| GTPBP8   | 1 | 7.0   | 3.6   | 3.4  | 0.2   |
| C3orf17  | 1 | 61.9  | 56.6  | 5.3  | 51.3  |
| SPICE1   | 1 | 12.5  | 9.6   | 2.9  | 6.8   |
| WDFY3    | 1 | 15.5  | 10.6  | 4.9  | 5.7   |
| COX18    | 2 | 26.9  | 12.6  | 14.3 | -1.7  |
| ALB      | 4 | 23.5  | 13.9  | 9.6  | 4.3   |
| THOC7    | 1 | 21.0  | 15.5  | 5.5  | 10.1  |
| ATXN7    | 1 | 12.3  | 8.2   | 4.2  | 4.0   |
| PSMD6    | 1 | 19.4  | 14.5  | 4.8  | 9.7   |
| GMPS     | 7 | 14.9  | 1.7   | 13.2 | -11.5 |
| TIPARP   | 1 | 14.4  | 8.8   | 5.5  | 3.3   |
| CCNL1    | 1 | 98.5  | 94.8  | 3.8  | 91.0  |

|          |    |       |       |      |       |
|----------|----|-------|-------|------|-------|
| SLMAP    | 1  | 41.9  | 38.7  | 3.1  | 35.6  |
| RPL9     | 0  | 9.0   | 3.2   | 5.8  | -2.7  |
| SMIM14   | 0  | 7.7   | 2.8   | 4.9  | -2.1  |
| RPP14    | 0  | 8.7   | 3.5   | 5.3  | -1.8  |
| ABHD6    | 2  | 23.8  | 10.0  | 13.8 | -3.8  |
| RBM47    | 4  | 14.4  | 5.4   | 9.1  | -3.7  |
| APBB2    | 3  | 11.9  | 4.6   | 7.3  | -2.7  |
| IL17RC   | 0  | 14.1  | 6.3   | 7.8  | -1.5  |
| CRELD1   | 0  | 10.2  | 5.6   | 4.6  | 1.0   |
| PCOLCE2  | 1  | 10.3  | 5.9   | 4.4  | 1.5   |
| U2SURP   | 1  | 108.0 | 102.8 | 5.3  | 97.5  |
| MTMR14   | 2  | 16.3  | 5.0   | 11.2 | -6.2  |
| TTC14    | 1  | 19.4  | 16.8  | 2.5  | 14.3  |
| MTHFD2L  | 0  | 6.8   | 2.7   | 4.0  | -1.3  |
| CXCL1    | 0  | 6.7   | 3.3   | 3.4  | 0.0   |
| RCHY1    | 1  | 14.5  | 9.8   | 4.7  | 5.1   |
| GYG1     | 0  | 9.3   | 3.9   | 5.4  | -1.4  |
| HPS3     | 1  | 13.1  | 7.1   | 6.0  | 1.1   |
| TOPBP1   | 1  | 94.9  | 84.2  | 10.7 | 73.5  |
| RYK      | 1  | 47.6  | 43.9  | 3.7  | 40.2  |
| ZNF513   | 2  | 14.7  | 4.8   | 9.9  | -5.1  |
| SLC4A1AP | 1  | 20.8  | 17.6  | 3.2  | 14.4  |
| KIAA1143 | 1  | 14.6  | 11.7  | 3.0  | 8.7   |
| KIF15    | 7  | 32.2  | 5.4   | 26.7 | -21.3 |
| WDR43    | 1  | 106.7 | 93.7  | 12.9 | 80.8  |
| ZDHHC3   | 0  | 8.3   | 4.0   | 4.3  | -0.4  |
| LZTFL1   | 1  | 10.0  | 7.2   | 2.9  | 4.3   |
| FYCO1    | 0  | 11.5  | 5.0   | 6.5  | -1.5  |
| ELP6     | 0  | 15.2  | 6.1   | 9.1  | -3.0  |
| DTX3L    | 0  | 11.7  | 4.5   | 7.1  | -2.6  |
| ZNF148   | 1  | 37.5  | 33.4  | 4.0  | 29.4  |
| SMIM12   | 2  | 17.5  | 6.1   | 11.4 | -5.2  |
| TPRA1    | 10 | 14.0  | 1.4   | 12.6 | -11.2 |
| YEATS2   | 0  | 6.8   | 3.0   | 3.9  | -0.9  |
| ZC3H12A  | 0  | 13.9  | 5.5   | 8.4  | -2.9  |
| MEAF6    | 0  | 7.6   | 2.9   | 4.7  | -1.8  |
| SNIP1    | 2  | 18.7  | 6.2   | 12.5 | -6.3  |
| POLR2H   | 0  | 14.5  | 5.2   | 9.2  | -4.0  |
| TMEM41A  | 4  | 14.1  | 3.6   | 10.5 | -7.0  |
| RPN1     | 0  | 17.4  | 7.2   | 10.2 | -3.1  |
| SENP2    | 1  | 16.3  | 12.4  | 3.8  | 8.6   |
| IFT122   | 0  | 6.9   | 3.4   | 3.5  | -0.1  |
| RFC4     | 7  | 27.3  | 4.5   | 22.8 | -18.2 |
| RPL39L   | 0  | 5.6   | 2.4   | 3.3  | -0.9  |
| BAP1     | 0  | 13.2  | 6.2   | 6.9  | -0.7  |
| TKT      | 3  | 11.4  | 3.3   | 8.1  | -4.8  |
| PRKCD    | 2  | 18.8  | 6.8   | 12.0 | -5.1  |
| RFT1     | 2  | 17.6  | 6.3   | 11.3 | -5.0  |
| SFMBT1   | 0  | 10.1  | 4.3   | 5.8  | -1.6  |
| GNL3     | 1  | 63.5  | 59.8  | 3.7  | 56.1  |
| PBRM1    | 1  | 22.9  | 17.5  | 5.4  | 12.1  |
| FAM208A  | 1  | 65.0  | 60.1  | 4.9  | 55.3  |
| ARHGEF3  | 0  | 5.0   | 1.9   | 3.1  | -1.2  |
| SLBP     | 7  | 18.7  | 3.1   | 15.5 | -12.4 |

|          |   |      |      |      |       |
|----------|---|------|------|------|-------|
| LRPAP1   | 0 | 8.7  | 4.3  | 4.4  | -0.1  |
| UBXN7    | 1 | 18.4 | 13.9 | 4.4  | 9.5   |
| RNF168   | 1 | 11.1 | 6.5  | 4.6  | 1.8   |
| PIGX     | 0 | 7.2  | 3.3  | 3.9  | -0.6  |
| MFI2     | 0 | 9.8  | 4.3  | 5.5  | -1.2  |
| S100P    | 4 | 20.4 | 8.8  | 11.6 | -2.9  |
| EXO5     | 0 | 10.5 | 4.7  | 5.8  | -1.1  |
| C1orf50  | 0 | 15.1 | 6.5  | 8.6  | -2.0  |
| ZNF691   | 2 | 21.6 | 10.1 | 11.5 | -1.4  |
| AIMP1    | 1 | 63.9 | 57.6 | 6.2  | 51.4  |
| SGMS2    | 0 | 7.5  | 2.9  | 4.6  | -1.7  |
| METAP1   | 1 | 27.3 | 22.7 | 4.6  | 18.1  |
| DNAJB14  | 1 | 21.5 | 18.9 | 2.6  | 16.2  |
| H2AFZ    | 5 | 17.3 | 3.9  | 13.3 | -9.4  |
| SLC9B2   | 4 | 13.4 | 2.9  | 10.5 | -7.6  |
| BDH2     | 0 | 9.2  | 4.0  | 5.2  | -1.3  |
| PGRMC2   | 1 | 13.4 | 9.1  | 4.3  | 4.8   |
| CDC25A   | 0 | 22.2 | 8.4  | 13.8 | -5.3  |
| PLXNB1   | 4 | 15.6 | 7.3  | 8.3  | -1.1  |
| CCDC51   | 2 | 24.9 | 10.2 | 14.7 | -4.6  |
| SHISA5   | 0 | 10.7 | 4.8  | 5.8  | -1.0  |
| SPRY1    | 0 | 11.5 | 4.9  | 6.6  | -1.7  |
| APEH     | 0 | 11.8 | 5.4  | 6.4  | -1.1  |
| RNF123   | 6 | 13.7 | 4.2  | 9.5  | -5.3  |
| HSPA4L   | 1 | 7.9  | 4.3  | 3.5  | 0.8   |
| MFSD8    | 1 | 15.8 | 11.4 | 4.4  | 7.1   |
| MON1A    | 2 | 31.1 | 15.5 | 15.6 | -0.1  |
| TEX264   | 0 | 13.6 | 6.0  | 7.6  | -1.7  |
| DUSP7    | 0 | 12.8 | 5.2  | 7.7  | -2.5  |
| POC1A    | 2 | 23.8 | 7.3  | 16.5 | -9.1  |
| PPM1M    | 0 | 14.4 | 6.0  | 8.4  | -2.5  |
| WDR82    | 0 | 9.4  | 5.2  | 4.2  | 1.0   |
| C4orf3   | 0 | 7.4  | 3.1  | 4.3  | -1.2  |
| HMGB2    | 5 | 26.6 | 11.4 | 15.3 | -3.9  |
| SAP30    | 0 | 9.0  | 2.7  | 6.2  | -3.5  |
| MAD2L1   | 7 | 45.6 | 7.4  | 38.1 | -30.7 |
| ANXA5    | 0 | 4.4  | 2.0  | 2.4  | -0.5  |
| FBXO8    | 1 | 6.9  | 3.9  | 3.0  | 0.9   |
| HPGD     | 0 | 5.8  | 2.1  | 3.7  | -1.6  |
| NAA15    | 1 | 58.9 | 50.1 | 8.8  | 41.4  |
| ARFIP1   | 1 | 27.6 | 24.6 | 3.0  | 21.6  |
| ICE1     | 1 | 25.3 | 20.8 | 4.5  | 16.3  |
| ANAPC10  | 7 | 10.4 | 1.1  | 9.3  | -8.2  |
| ABCE1    | 1 | 84.5 | 75.4 | 9.1  | 66.2  |
| OTUD4    | 1 | 34.1 | 29.9 | 4.3  | 25.6  |
| LSM6     | 7 | 12.7 | 1.3  | 11.4 | -10.2 |
| TMEM184C | 1 | 10.3 | 7.1  | 3.1  | 4.0   |
| ITGA2    | 0 | 9.9  | 4.7  | 5.2  | -0.6  |
| MOCS2    | 0 | 6.9  | 2.9  | 4.0  | -1.0  |
| EDIL3    | 3 | 21.5 | 9.9  | 11.6 | -1.7  |
| TMEM161B | 1 | 22.4 | 19.0 | 3.3  | 15.7  |
| NDUFAF2  | 0 | 12.1 | 5.3  | 6.8  | -1.4  |
| NIPBL    | 1 | 50.9 | 44.7 | 6.2  | 38.4  |
| SLC25A46 | 1 | 26.4 | 22.4 | 3.9  | 18.5  |

|         |   |       |      |      |       |
|---------|---|-------|------|------|-------|
| STARD4  | 1 | 17.0  | 13.9 | 3.1  | 10.8  |
| PGGT1B  | 1 | 39.4  | 32.8 | 6.7  | 26.1  |
| CMBL    | 0 | 9.2   | 3.8  | 5.4  | -1.6  |
| PRRC1   | 1 | 22.5  | 19.4 | 3.1  | 16.3  |
| F2RL1   | 3 | 8.7   | 3.2  | 5.5  | -2.3  |
| AGGF1   | 1 | 23.6  | 19.8 | 3.8  | 16.0  |
| WDR41   | 1 | 16.6  | 11.4 | 5.2  | 6.2   |
| NDUFS4  | 1 | 9.6   | 5.0  | 4.5  | 0.5   |
| SPINK1  | 4 | 11.3  | 5.7  | 5.6  | 0.1   |
| GRPEL2  | 1 | 17.6  | 10.6 | 6.9  | 3.7   |
| RHOBTB3 | 1 | 19.5  | 14.5 | 5.0  | 9.4   |
| GPX8    | 3 | 21.6  | 6.5  | 15.1 | -8.5  |
| SERINC5 | 4 | 9.2   | 2.5  | 6.7  | -4.3  |
| CASP3   | 1 | 16.3  | 12.9 | 3.4  | 9.4   |
| PRIMPOL | 7 | 13.9  | 1.5  | 12.4 | -10.8 |
| ERAP1   | 0 | 6.0   | 1.7  | 4.3  | -2.6  |
| ERAP2   | 1 | 7.7   | 4.7  | 3.0  | 1.7   |
| CFAP97  | 1 | 15.6  | 13.2 | 2.5  | 10.7  |
| PAPD4   | 1 | 50.6  | 46.9 | 3.7  | 43.2  |
| ANKRA2  | 1 | 10.5  | 7.0  | 3.5  | 3.6   |
| UBLCP1  | 1 | 51.3  | 45.2 | 6.1  | 39.1  |
| UTP15   | 1 | 37.2  | 32.4 | 4.7  | 27.7  |
| NSA2    | 1 | 64.5  | 58.9 | 5.6  | 53.2  |
| GFM2    | 1 | 22.1  | 18.5 | 3.6  | 15.0  |
| 8-Sep   | 0 | 6.0   | 2.8  | 3.3  | -0.5  |
| SHROOM1 | 4 | 18.5  | 7.4  | 11.1 | -3.8  |
| UQCRQ   | 0 | 8.9   | 3.7  | 5.2  | -1.5  |
| SLC35A1 | 1 | 13.5  | 9.8  | 3.7  | 6.0   |
| CITED2  | 7 | 7.7   | 0.6  | 7.0  | -6.4  |
| DCBLD1  | 3 | 11.4  | 3.8  | 7.6  | -3.7  |
| SFXN1   | 0 | 11.7  | 3.8  | 7.9  | -4.1  |
| PDSS2   | 4 | 15.0  | 4.8  | 10.2 | -5.5  |
| STXBP5  | 1 | 9.2   | 5.9  | 3.3  | 2.5   |
| DAGLB   | 0 | 15.1  | 5.3  | 9.7  | -4.4  |
| STK17A  | 0 | 11.7  | 2.4  | 9.3  | -7.0  |
| TRA2A   | 1 | 66.6  | 61.1 | 5.5  | 55.6  |
| GALNT10 | 3 | 15.9  | 9.2  | 6.6  | 2.6   |
| SAP30L  | 0 | 10.7  | 3.3  | 7.3  | -4.0  |
| RPS14   | 0 | 14.0  | 4.5  | 9.4  | -4.9  |
| COG5    | 1 | 8.3   | 5.9  | 2.3  | 3.6   |
| SLU7    | 1 | 101.3 | 97.0 | 4.3  | 92.8  |
| RP9     | 2 | 12.8  | 5.2  | 7.6  | -2.4  |
| PTTG1   | 5 | 22.3  | 12.2 | 10.1 | 2.1   |
| CAMLG   | 1 | 13.8  | 8.0  | 5.8  | 2.1   |
| ZNF12   | 1 | 9.9   | 7.0  | 2.9  | 4.1   |
| SLC29A4 | 4 | 13.2  | 4.0  | 9.2  | -5.2  |
| STEAP1  | 0 | 6.9   | 2.6  | 4.3  | -1.7  |
| CDCA7L  | 3 | 8.1   | 2.2  | 5.9  | -3.6  |
| MIOS    | 7 | 16.5  | 1.8  | 14.7 | -12.9 |
| FABP5   | 0 | 6.2   | 1.9  | 4.3  | -2.5  |
| COL1A2  | 0 | 9.5   | 3.0  | 6.5  | -3.5  |
| CHMP4C  | 4 | 11.6  | 4.9  | 6.7  | -1.8  |
| BRI3    | 0 | 9.6   | 4.6  | 5.0  | -0.4  |
| LMTK2   | 4 | 19.9  | 7.8  | 12.0 | -4.2  |



|           |    |      |      |      |       |
|-----------|----|------|------|------|-------|
| CTSB      | 3  | 10.6 | 3.8  | 6.8  | -3.1  |
| DLC1      | 0  | 8.9  | 3.5  | 5.4  | -1.9  |
| PEX2      | 6  | 14.5 | 2.3  | 12.2 | -9.9  |
| RAD21     | 1  | 75.8 | 70.5 | 5.2  | 65.3  |
| MED30     | 0  | 8.0  | 2.7  | 5.3  | -2.7  |
| TNFRSF11F | 0  | 6.3  | 2.7  | 3.7  | -1.0  |
| PHKG1     | 2  | 17.1 | 6.7  | 10.5 | -3.8  |
| SPIDR     | 1  | 13.0 | 8.9  | 4.1  | 4.8   |
| ORC5      | 1  | 18.4 | 13.7 | 4.6  | 9.1   |
| DNAAF5    | 0  | 11.4 | 4.4  | 7.0  | -2.5  |
| OSGIN2    | 1  | 12.1 | 8.6  | 3.4  | 5.2   |
| SUN1      | 0  | 8.2  | 3.3  | 4.9  | -1.6  |
| OXR1      | 1  | 18.1 | 15.7 | 2.4  | 13.3  |
| TMEM184A  | 4  | 20.1 | 7.7  | 12.5 | -4.8  |
| MICALL2   | 0  | 20.0 | 7.0  | 13.0 | -5.9  |
| INTS1     | 2  | 14.0 | 4.8  | 9.2  | -4.4  |
| CDK5      | 0  | 6.5  | 3.0  | 3.5  | -0.5  |
| SLC4A2    | 3  | 9.5  | 2.8  | 6.7  | -3.9  |
| FASTK     | 0  | 12.8 | 4.7  | 8.1  | -3.4  |
| TMUB1     | 2  | 16.5 | 5.6  | 10.9 | -5.4  |
| C7orf55   | 0  | 12.5 | 4.6  | 7.8  | -3.2  |
| PHAX      | 1  | 75.0 | 66.8 | 8.2  | 58.5  |
| ALDH7A1   | 5  | 9.3  | 2.4  | 6.9  | -4.6  |
| FOXK1     | 2  | 36.6 | 18.0 | 18.5 | -0.5  |
| COX6C     | 1  | 14.8 | 11.0 | 3.8  | 7.1   |
| YWHAZ     | 1  | 15.9 | 8.7  | 7.1  | 1.6   |
| FZD6      | 1  | 11.9 | 7.1  | 4.8  | 2.3   |
| SLC25A32  | 1  | 18.2 | 14.7 | 3.5  | 11.2  |
| DCAF13    | 1  | 46.0 | 41.2 | 4.8  | 36.4  |
| INTS8     | 1  | 56.8 | 52.7 | 4.1  | 48.6  |
| KIAA1429  | 1  | 54.1 | 48.4 | 5.7  | 42.6  |
| GEM       | 3  | 7.2  | 2.3  | 4.9  | -2.6  |
| PDP1      | 3  | 16.8 | 6.1  | 10.7 | -4.5  |
| TMEM67    | 1  | 14.9 | 11.1 | 3.9  | 7.2   |
| KIAA0196  | 1  | 14.4 | 11.3 | 3.1  | 8.2   |
| RPP25L    | 2  | 24.3 | 11.0 | 13.2 | -2.2  |
| FAM219A   | 0  | 14.2 | 5.9  | 8.2  | -2.3  |
| SNAPC3    | 0  | 8.5  | 3.0  | 5.5  | -2.4  |
| NUDT2     | 0  | 10.7 | 4.4  | 6.2  | -1.8  |
| TMEM65    | 1  | 5.4  | 2.8  | 2.6  | 0.2   |
| PSIP1     | 1  | 26.5 | 21.4 | 5.0  | 16.4  |
| UBAP1     | 0  | 10.5 | 4.2  | 6.3  | -2.0  |
| ABCA1     | 1  | 7.9  | 4.5  | 3.4  | 1.1   |
| NFIL3     | 0  | 5.8  | 2.1  | 3.6  | -1.5  |
| METTL2B   | 0  | 9.7  | 3.7  | 6.0  | -2.3  |
| FXN       | 10 | 17.5 | 1.7  | 15.8 | -14.1 |
| ALDH1A1   | 4  | 12.5 | 5.4  | 7.2  | -1.8  |
| KDM1B     | 0  | 7.4  | 2.3  | 5.1  | -2.8  |
| HGSNAT    | 0  | 8.3  | 4.4  | 3.9  | 0.5   |
| C9orf64   | 0  | 8.5  | 2.5  | 5.9  | -3.4  |
| HNRNPK    | 1  | 52.6 | 47.4 | 5.2  | 42.2  |
| ANKS6     | 0  | 7.6  | 3.2  | 4.3  | -1.1  |
| ZHX1      | 1  | 15.1 | 11.2 | 4.0  | 7.2   |
| DYNLT3    | 1  | 8.5  | 5.7  | 2.8  | 2.9   |

|          |    |      |      |      |       |
|----------|----|------|------|------|-------|
| MID1IP1  | 4  | 12.9 | 4.7  | 8.3  | -3.6  |
| PIGA     | 1  | 17.4 | 14.0 | 3.3  | 10.7  |
| STRBP    | 1  | 21.5 | 15.5 | 6.0  | 9.5   |
| GAPVD1   | 1  | 13.3 | 7.9  | 5.4  | 2.5   |
| CARD19   | 10 | 18.6 | 1.6  | 17.0 | -15.4 |
| ZNF367   | 7  | 13.2 | 2.0  | 11.2 | -9.2  |
| NDUFB6   | 6  | 10.1 | 1.7  | 8.4  | -6.6  |
| NOL6     | 2  | 18.8 | 7.4  | 11.3 | -3.9  |
| VCP      | 0  | 7.2  | 3.4  | 3.7  | -0.3  |
| PIGO     | 2  | 16.8 | 6.4  | 10.4 | -4.1  |
| STOML2   | 2  | 18.0 | 6.1  | 12.0 | -5.9  |
| MELK     | 5  | 19.1 | 5.8  | 13.3 | -7.5  |
| ARHGAP12 | 1  | 27.1 | 24.4 | 2.6  | 21.8  |
| CLDN2    | 3  | 11.5 | 3.5  | 8.0  | -4.5  |
| SPTSSA   | 1  | 14.6 | 11.7 | 2.9  | 8.8   |
| 8-Mar    | 0  | 12.0 | 5.6  | 6.4  | -0.8  |
| CFL2     | 7  | 16.8 | 2.3  | 14.5 | -12.3 |
| SUGT1    | 1  | 49.0 | 41.5 | 7.5  | 33.9  |
| GTF2A1   | 1  | 26.1 | 21.1 | 5.0  | 16.1  |
| ZCCHC24  | 3  | 11.3 | 3.7  | 7.6  | -3.9  |
| INPPL1   | 0  | 7.0  | 3.1  | 3.9  | -0.7  |
| CRYL1    | 2  | 22.9 | 7.0  | 15.9 | -8.9  |
| REEP3    | 1  | 39.0 | 29.3 | 9.7  | 19.6  |
| SKA3     | 7  | 20.5 | 4.9  | 15.6 | -10.6 |
| MICU2    | 1  | 21.1 | 17.8 | 3.3  | 14.5  |
| DDIAS    | 7  | 18.7 | 3.3  | 15.5 | -12.2 |
| PCF11    | 1  | 27.9 | 23.8 | 4.0  | 19.8  |
| LRR1     | 7  | 14.8 | 2.7  | 12.1 | -9.5  |
| RPL36AL  | 1  | 47.3 | 43.3 | 4.0  | 39.3  |
| DNAAF2   | 0  | 14.5 | 5.3  | 9.1  | -3.8  |
| C10orf10 | 0  | 9.2  | 4.4  | 4.8  | -0.5  |
| KLHDC2   | 1  | 17.9 | 9.8  | 8.1  | 1.8   |
| NEMF     | 1  | 59.9 | 53.5 | 6.4  | 47.1  |
| RPUSD4   | 0  | 15.2 | 6.4  | 8.8  | -2.5  |
| ARF6     | 0  | 6.7  | 2.2  | 4.5  | -2.4  |
| TTC8     | 1  | 12.8 | 9.3  | 3.5  | 5.8   |
| NUDT5    | 1  | 16.7 | 11.4 | 5.2  | 6.2   |
| BEND7    | 0  | 8.8  | 2.1  | 6.7  | -4.6  |
| ATP5C1   | 1  | 16.5 | 10.1 | 6.4  | 3.7   |
| PRPF18   | 1  | 19.3 | 15.9 | 3.4  | 12.5  |
| VDAC2    | 0  | 11.7 | 5.3  | 6.4  | -1.0  |
| COMTD1   | 2  | 32.2 | 17.0 | 15.2 | 1.9   |
| PDZD8    | 1  | 11.8 | 8.3  | 3.5  | 4.7   |
| ZNF503   | 0  | 10.9 | 5.9  | 5.0  | 1.0   |
| FAM175B  | 1  | 23.0 | 17.5 | 5.5  | 12.0  |
| QSOX2    | 10 | 12.4 | 1.8  | 10.6 | -8.8  |
| FAM204A  | 1  | 22.1 | 16.9 | 5.2  | 11.7  |
| NSD1     | 0  | 10.1 | 3.0  | 7.1  | -4.2  |
| PRDX3    | 1  | 31.4 | 25.8 | 5.7  | 20.1  |
| ENOX2    | 0  | 6.7  | 2.8  | 3.8  | -1.0  |
| GHITM    | 0  | 6.3  | 1.9  | 4.3  | -2.4  |
| SNAPC4   | 2  | 51.0 | 27.7 | 23.3 | 4.3   |
| PMPCA    | 10 | 15.4 | 2.7  | 12.7 | -9.9  |
| SDCCAG3  | 10 | 13.1 | 2.7  | 10.4 | -7.7  |

|          |    |      |      |      |       |
|----------|----|------|------|------|-------|
| TSC1     | 0  | 7.9  | 3.5  | 4.4  | -0.8  |
| HPRT1    | 7  | 17.3 | 2.0  | 15.3 | -13.3 |
| BORCS5   | 2  | 21.2 | 8.9  | 12.3 | -3.4  |
| ZMYND19  | 10 | 27.2 | 6.7  | 20.5 | -13.9 |
| DDX21    | 1  | 85.8 | 77.8 | 8.0  | 69.7  |
| BMS1     | 1  | 27.3 | 20.8 | 6.5  | 14.3  |
| STK32C   | 0  | 10.0 | 4.6  | 5.4  | -0.7  |
| FUNDC2   | 0  | 7.4  | 3.6  | 3.8  | -0.2  |
| TMEM55B  | 0  | 6.6  | 2.7  | 3.8  | -1.1  |
| METTL17  | 0  | 8.6  | 3.1  | 5.6  | -2.5  |
| NDRG2    | 4  | 26.7 | 13.9 | 12.8 | 1.0   |
| ARHGEF40 | 0  | 7.4  | 3.4  | 4.0  | -0.6  |
| NSMF     | 10 | 11.1 | 1.8  | 9.2  | -7.4  |
| ZNF219   | 2  | 14.5 | 4.5  | 10.0 | -5.5  |
| CASP7    | 0  | 5.2  | 2.4  | 2.9  | -0.5  |
| METTL3   | 0  | 10.2 | 3.9  | 6.3  | -2.4  |
| TRUB1    | 1  | 17.6 | 12.0 | 5.6  | 6.5   |
| ZFYVE1   | 0  | 18.0 | 7.8  | 10.2 | -2.4  |
| UBTD1    | 3  | 24.6 | 7.1  | 17.5 | -10.3 |
| E2F7     | 3  | 13.0 | 4.2  | 8.8  | -4.5  |
| ISCA2    | 0  | 7.5  | 3.3  | 4.3  | -1.0  |
| PACSIN3  | 0  | 10.0 | 4.2  | 5.9  | -1.7  |
| TTC7B    | 0  | 11.5 | 4.2  | 7.3  | -3.1  |
| SLC39A13 | 3  | 22.7 | 8.0  | 14.8 | -6.8  |
| PSMC3    | 5  | 13.6 | 3.3  | 10.3 | -7.0  |
| CPSF2    | 1  | 72.7 | 64.6 | 8.1  | 56.5  |
| MOAP1    | 0  | 10.2 | 4.5  | 5.8  | -1.3  |
| IFI27L1  | 0  | 10.5 | 4.6  | 5.9  | -1.2  |
| IFI27    | 0  | 13.2 | 5.3  | 8.0  | -2.7  |
| CLMN     | 3  | 6.5  | 2.3  | 4.1  | -1.8  |
| PTER     | 0  | 7.4  | 2.0  | 5.4  | -3.4  |
| HACD1    | 7  | 9.1  | 0.8  | 8.4  | -7.6  |
| ARL5B    | 1  | 21.0 | 16.9 | 4.1  | 12.8  |
| SMCO4    | 0  | 7.6  | 2.7  | 4.9  | -2.1  |
| TAF1D    | 1  | 72.6 | 66.8 | 5.8  | 60.9  |
| ABTB2    | 2  | 22.7 | 8.9  | 13.8 | -4.9  |
| R3HCC1L  | 1  | 15.6 | 9.7  | 5.9  | 3.9   |
| HTRA1    | 3  | 10.6 | 3.7  | 6.9  | -3.3  |
| LIPC     | 4  | 17.5 | 10.5 | 7.0  | 3.5   |
| CEP57    | 1  | 43.4 | 38.3 | 5.1  | 33.1  |
| SPRED1   | 1  | 9.0  | 5.4  | 3.6  | 1.8   |
| GPR176   | 3  | 19.3 | 11.5 | 7.8  | 3.7   |
| GPT2     | 0  | 14.1 | 5.5  | 8.6  | -3.2  |
| RAB8B    | 1  | 8.9  | 5.2  | 3.6  | 1.6   |
| IKBIP    | 1  | 19.1 | 15.1 | 4.0  | 11.1  |
| RPUSD2   | 2  | 31.7 | 14.7 | 17.0 | -2.4  |
| HIF1AN   | 0  | 9.0  | 5.0  | 4.0  | 0.9   |
| NDUFB8   | 0  | 15.4 | 6.0  | 9.4  | -3.4  |
| ZFYVE19  | 4  | 13.1 | 3.3  | 9.8  | -6.5  |
| FBN1     | 3  | 12.4 | 3.6  | 8.8  | -5.1  |
| BRD7     | 1  | 11.1 | 6.3  | 4.8  | 1.5   |
| CKB      | 0  | 6.8  | 2.7  | 4.1  | -1.4  |
| TRMT61A  | 2  | 40.4 | 22.5 | 17.9 | 4.6   |
| BTRC     | 0  | 9.6  | 5.1  | 4.5  | 0.5   |

|          |   |      |      |      |       |
|----------|---|------|------|------|-------|
| POLL     | 2 | 16.4 | 5.8  | 10.7 | -4.9  |
| BAG5     | 1 | 13.2 | 8.4  | 4.8  | 3.6   |
| DPCD     | 0 | 11.6 | 5.8  | 5.8  | 0.0   |
| LARP6    | 3 | 12.5 | 6.2  | 6.3  | 0.0   |
| API5     | 1 | 43.2 | 39.1 | 4.0  | 35.1  |
| HPS6     | 2 | 42.2 | 20.5 | 21.7 | -1.2  |
| NOLC1    | 1 | 20.7 | 11.7 | 9.1  | 2.6   |
| ALKBH3   | 0 | 5.3  | 2.3  | 3.0  | -0.6  |
| COPS2    | 1 | 62.0 | 57.9 | 4.1  | 53.7  |
| SGPL1    | 0 | 9.6  | 3.9  | 5.8  | -1.9  |
| FRS2     | 1 | 17.1 | 12.6 | 4.5  | 8.2   |
| CCT2     | 1 | 37.8 | 29.6 | 8.2  | 21.4  |
| PCBD1    | 5 | 16.3 | 5.3  | 11.0 | -5.6  |
| ARIH1    | 1 | 75.5 | 61.8 | 13.6 | 48.2  |
| COX11    | 1 | 14.6 | 10.2 | 4.4  | 5.9   |
| ZNF202   | 0 | 12.9 | 6.1  | 6.8  | -0.7  |
| CUL5     | 1 | 23.0 | 18.8 | 4.2  | 14.6  |
| WBP1L    | 0 | 21.3 | 8.6  | 12.8 | -4.2  |
| BORCS7   | 1 | 13.1 | 7.1  | 6.0  | 1.0   |
| C2       | 4 | 11.4 | 4.4  | 7.0  | -2.6  |
| ANAPC16  | 1 | 10.6 | 5.8  | 4.8  | 0.9   |
| SMPD1    | 3 | 14.0 | 5.5  | 8.5  | -3.0  |
| APBB1    | 0 | 9.6  | 4.4  | 5.2  | -0.8  |
| TRIM44   | 0 | 11.1 | 3.3  | 7.7  | -4.4  |
| ILK      | 3 | 14.7 | 5.7  | 9.0  | -3.3  |
| TAF10    | 6 | 7.8  | 1.6  | 6.2  | -4.5  |
| TPP1     | 0 | 8.7  | 4.3  | 4.4  | -0.1  |
| CYB5A    | 0 | 8.7  | 3.6  | 5.1  | -1.5  |
| USP54    | 0 | 6.5  | 2.8  | 3.6  | -0.8  |
| C11orf74 | 0 | 6.4  | 2.3  | 4.1  | -1.8  |
| ATP9B    | 4 | 12.3 | 4.0  | 8.3  | -4.4  |
| PPFIBP2  | 4 | 8.7  | 2.4  | 6.4  | -4.0  |
| KIAA0355 | 0 | 9.7  | 4.4  | 5.3  | -0.9  |
| SERPINB8 | 3 | 10.7 | 3.5  | 7.2  | -3.7  |
| IDH3A    | 1 | 46.1 | 36.9 | 9.2  | 27.7  |
| XRRA1    | 0 | 9.1  | 3.7  | 5.4  | -1.7  |
| RPL27A   | 0 | 10.3 | 3.6  | 6.7  | -3.1  |
| ST5      | 0 | 9.2  | 2.8  | 6.4  | -3.6  |
| CENPN    | 7 | 30.0 | 5.4  | 24.6 | -19.1 |
| AKIP1    | 3 | 12.0 | 3.1  | 8.8  | -5.7  |
| ATMIN    | 1 | 12.4 | 5.9  | 6.5  | -0.6  |
| TMEM41B  | 1 | 16.6 | 13.2 | 3.4  | 9.8   |
| LEO1     | 1 | 22.4 | 16.9 | 5.5  | 11.4  |
| ZNF143   | 1 | 52.3 | 44.5 | 7.7  | 36.8  |
| TMX3     | 1 | 29.0 | 25.1 | 3.9  | 21.2  |
| WEE1     | 7 | 14.7 | 1.9  | 12.8 | -10.9 |
| MAPK7    | 0 | 7.8  | 3.5  | 4.3  | -0.8  |
| NDST2    | 2 | 17.2 | 6.4  | 10.8 | -4.3  |
| MCM7     | 5 | 17.7 | 5.6  | 12.1 | -6.5  |
| ZNF3     | 0 | 11.1 | 5.1  | 5.9  | -0.8  |
| ZSCAN21  | 2 | 16.2 | 5.6  | 10.7 | -5.1  |
| TK2      | 0 | 10.8 | 4.4  | 6.4  | -2.0  |
| TMED3    | 0 | 5.2  | 2.5  | 2.6  | -0.1  |
| SEC11C   | 1 | 9.4  | 4.7  | 4.7  | 0.0   |

|          |   |       |       |      |       |
|----------|---|-------|-------|------|-------|
| TMEM135  | 1 | 25.8  | 18.3  | 7.5  | 10.8  |
| NDEL1    | 1 | 12.6  | 8.0   | 4.7  | 3.3   |
| CENPV    | 0 | 9.7   | 3.0   | 6.7  | -3.7  |
| FAM96B   | 2 | 14.8  | 5.8   | 9.0  | -3.1  |
| HSP90B1  | 1 | 113.1 | 108.6 | 4.5  | 104.1 |
| BLCAP    | 2 | 13.9  | 4.8   | 9.1  | -4.4  |
| ATF7IP2  | 0 | 8.0   | 2.4   | 5.6  | -3.2  |
| NGFRAP1  | 0 | 4.7   | 2.0   | 2.7  | -0.7  |
| COG1     | 0 | 12.3  | 5.0   | 7.3  | -2.3  |
| PLEKHA7  | 0 | 6.8   | 2.6   | 4.2  | -1.5  |
| B2M      | 3 | 15.8  | 6.7   | 9.1  | -2.4  |
| ZNF592   | 0 | 10.6  | 4.8   | 5.8  | -1.0  |
| CASC4    | 1 | 44.8  | 40.8  | 4.0  | 36.8  |
| NNMT     | 3 | 27.0  | 19.0  | 7.9  | 11.1  |
| AP1G1    | 1 | 11.7  | 7.4   | 4.4  | 3.0   |
| C16orf45 | 0 | 8.3   | 3.4   | 5.0  | -1.6  |
| KIAA0430 | 0 | 9.9   | 5.1   | 4.8  | 0.2   |
| SAAL1    | 7 | 18.5  | 2.9   | 15.6 | -12.6 |
| PIIB     | 0 | 10.8  | 4.8   | 6.0  | -1.3  |
| FAM96A   | 1 | 16.0  | 9.6   | 6.4  | 3.1   |
| FAM111A  | 7 | 16.0  | 1.9   | 14.1 | -12.3 |
| KIAA0101 | 5 | 21.8  | 11.7  | 10.1 | 1.7   |
| PEX11A   | 4 | 14.7  | 5.3   | 9.5  | -4.2  |
| TMEM170A | 0 | 14.5  | 7.0   | 7.5  | -0.5  |
| ANPEP    | 4 | 11.1  | 5.0   | 6.0  | -1.0  |
| NAV2     | 3 | 10.4  | 3.2   | 7.3  | -4.1  |
| DCTN5    | 0 | 8.0   | 3.0   | 5.0  | -1.9  |
| TERF2IP  | 0 | 11.6  | 5.7   | 5.9  | -0.2  |
| PLK1     | 5 | 22.4  | 13.3  | 9.1  | 4.2   |
| CLPX     | 1 | 42.7  | 38.7  | 4.0  | 34.7  |
| NEMP1    | 7 | 17.0  | 2.5   | 14.5 | -11.9 |
| NAB2     | 0 | 11.9  | 5.5   | 6.4  | -0.9  |
| VPS39    | 0 | 8.0   | 4.1   | 3.9  | 0.2   |
| STAT6    | 0 | 7.4   | 3.2   | 4.3  | -1.1  |
| PATL1    | 0 | 6.5   | 2.3   | 4.2  | -2.0  |
| XRCC6BP1 | 7 | 10.3  | 1.2   | 9.1  | -7.9  |
| STX3     | 0 | 6.1   | 2.5   | 3.6  | -1.0  |
| MRPL16   | 2 | 21.8  | 7.9   | 13.9 | -6.0  |
| PIP4K2C  | 4 | 12.6  | 3.4   | 9.2  | -5.8  |
| MTMR10   | 1 | 8.2   | 5.4   | 2.8  | 2.6   |
| YWHAB    | 1 | 20.0  | 12.5  | 7.5  | 5.1   |
| GREM1    | 3 | 12.7  | 4.9   | 7.8  | -3.0  |
| TSC22D4  | 0 | 21.6  | 7.8   | 13.8 | -5.9  |
| DIS3L    | 1 | 22.2  | 15.4  | 6.8  | 8.7   |
| CCNDBP1  | 0 | 6.0   | 2.8   | 3.2  | -0.3  |
| SMAD3    | 3 | 20.2  | 12.5  | 7.7  | 4.8   |
| RCCD1    | 0 | 10.1  | 4.1   | 6.0  | -1.9  |
| AKTIP    | 1 | 9.5   | 5.3   | 4.2  | 1.0   |
| MAPRE2   | 0 | 6.9   | 2.7   | 4.2  | -1.5  |
| MARS     | 6 | 29.8  | 9.0   | 20.8 | -11.8 |
| MBD6     | 0 | 12.5  | 5.3   | 7.1  | -1.8  |
| CNPY4    | 0 | 11.4  | 6.2   | 5.2  | 1.0   |
| PDIA3    | 1 | 10.0  | 5.8   | 4.2  | 1.5   |
| NUDT21   | 0 | 10.5  | 3.6   | 6.9  | -3.2  |

|          |    |      |      |      |       |
|----------|----|------|------|------|-------|
| PBX3     | 3  | 11.5 | 4.0  | 7.5  | -3.5  |
| PHB      | 5  | 23.3 | 9.7  | 13.6 | -3.9  |
| SNRPD1   | 6  | 62.9 | 12.2 | 50.7 | -38.5 |
| TMEM92   | 0  | 6.8  | 2.9  | 3.9  | -1.0  |
| FAM102A  | 3  | 15.3 | 4.7  | 10.6 | -5.8  |
| ACSF2    | 0  | 6.1  | 2.2  | 4.0  | -1.8  |
| GOLGA2   | 0  | 9.3  | 3.7  | 5.6  | -1.9  |
| TRUB2    | 10 | 12.2 | 1.6  | 10.6 | -9.0  |
| COQ4     | 10 | 27.8 | 7.5  | 20.4 | -12.9 |
| SLC27A4  | 2  | 24.8 | 10.5 | 14.4 | -3.9  |
| URM1     | 10 | 13.8 | 4.0  | 9.8  | -5.8  |
| CERCAM   | 0  | 10.0 | 4.7  | 5.4  | -0.7  |
| DOLPP1   | 10 | 22.2 | 2.6  | 19.7 | -17.1 |
| ENDOG    | 2  | 61.2 | 34.8 | 26.4 | 8.3   |
| UGT1A6   | 0  | 16.2 | 6.9  | 9.3  | -2.4  |
| C15orf39 | 4  | 19.3 | 5.7  | 13.5 | -7.8  |
| SP2      | 2  | 19.7 | 6.4  | 13.3 | -6.9  |
| COQ7     | 0  | 7.7  | 2.6  | 5.1  | -2.5  |
| GPRC5B   | 0  | 10.4 | 4.0  | 6.3  | -2.3  |
| CRK      | 1  | 39.3 | 36.0 | 3.3  | 32.7  |
| FBX022   | 6  | 16.8 | 2.4  | 14.4 | -12.0 |
| TBC1D2B  | 3  | 10.7 | 5.3  | 5.4  | -0.1  |
| HDHD2    | 0  | 5.1  | 1.8  | 3.3  | -1.4  |
| RNF214   | 0  | 11.7 | 5.9  | 5.8  | 0.1   |
| CDK12    | 1  | 17.5 | 11.0 | 6.5  | 4.6   |
| DUS2     | 2  | 19.9 | 7.3  | 12.6 | -5.3  |
| POP5     | 0  | 13.8 | 4.5  | 9.3  | -4.8  |
| ENGASE   | 2  | 11.9 | 4.1  | 7.8  | -3.7  |
| ATP5L    | 6  | 21.8 | 8.5  | 13.3 | -4.8  |
| TBC1D16  | 0  | 14.2 | 6.2  | 7.9  | -1.7  |
| ENTHD2   | 2  | 17.6 | 6.0  | 11.7 | -5.7  |
| MYO5B    | 0  | 9.5  | 4.0  | 5.5  | -1.5  |
| ACAA2    | 4  | 8.4  | 2.1  | 6.3  | -4.2  |
| STIM1    | 3  | 12.2 | 3.7  | 8.4  | -4.7  |
| RRM1     | 5  | 35.9 | 9.1  | 26.8 | -17.7 |
| TRIM68   | 0  | 14.3 | 5.3  | 9.0  | -3.7  |
| FN3K     | 2  | 16.9 | 5.6  | 11.3 | -5.6  |
| IRGQ     | 0  | 9.5  | 4.8  | 4.7  | 0.0   |
| ZNF226   | 0  | 6.1  | 2.9  | 3.3  | -0.4  |
| PPP2R3B  | 0  | 9.7  | 4.3  | 5.3  | -1.0  |
| ZNF668   | 11 | 33.1 | 3.8  | 29.3 | -25.5 |
| ZNF646   | 11 | 37.6 | 5.4  | 32.2 | -26.7 |
| VKORC1   | 11 | 20.1 | 3.4  | 16.8 | -13.4 |
| SMG8     | 0  | 11.9 | 4.1  | 7.8  | -3.7  |
| TPM4     | 1  | 40.0 | 35.9 | 4.1  | 31.8  |
| RAB8A    | 7  | 17.8 | 2.0  | 15.7 | -13.7 |
| GPX4     | 8  | 8.8  | 1.3  | 7.6  | -6.3  |
| MIDN     | 8  | 16.9 | 2.7  | 14.1 | -11.4 |
| GATAD2A  | 8  | 16.9 | 3.0  | 14.0 | -11.0 |
| MVD      | 2  | 13.5 | 4.3  | 9.3  | -5.0  |
| CDT1     | 5  | 19.0 | 6.7  | 12.3 | -5.6  |
| TRAPPC2L | 6  | 16.5 | 6.8  | 9.7  | -2.9  |
| ANKRD11  | 0  | 7.9  | 3.1  | 4.8  | -1.8  |
| SPATA33  | 0  | 12.9 | 5.5  | 7.4  | -1.8  |

|           |   |      |      |      |       |
|-----------|---|------|------|------|-------|
| SGK494    | 0 | 6.3  | 2.9  | 3.3  | -0.4  |
| RPL13     | 8 | 19.1 | 2.8  | 16.3 | -13.6 |
| ZNF641    | 0 | 5.8  | 2.9  | 2.8  | 0.1   |
| CACNB3    | 3 | 11.9 | 5.2  | 6.7  | -1.6  |
| DHRS13    | 4 | 24.9 | 6.4  | 18.4 | -12.0 |
| TP53I13   | 0 | 10.8 | 4.0  | 6.9  | -2.9  |
| KMT2D     | 0 | 12.4 | 6.8  | 5.6  | 1.2   |
| TUBA1A    | 3 | 10.1 | 4.0  | 6.1  | -2.2  |
| TUBA1C    | 5 | 23.0 | 13.4 | 9.6  | 3.8   |
| SERTAD3   | 0 | 9.2  | 4.9  | 4.3  | 0.6   |
| NCKAP5L   | 2 | 20.1 | 6.7  | 13.4 | -6.7  |
| RAB4B     | 2 | 17.8 | 6.5  | 11.3 | -4.8  |
| PROSER3   | 0 | 10.9 | 5.4  | 5.4  | 0.0   |
| CYP2S1    | 2 | 9.0  | 3.0  | 6.0  | -3.1  |
| AXL       | 3 | 32.9 | 23.9 | 9.0  | 14.8  |
| LENG8     | 0 | 8.4  | 4.2  | 4.2  | 0.0   |
| ZNF526    | 2 | 28.8 | 13.7 | 15.1 | -1.4  |
| TRAPPC9   | 2 | 16.4 | 5.4  | 11.0 | -5.6  |
| ZNF146    | 1 | 86.0 | 81.7 | 4.3  | 77.4  |
| SPINT2    | 0 | 7.3  | 3.1  | 4.2  | -1.0  |
| C19orf33  | 0 | 5.5  | 2.1  | 3.4  | -1.3  |
| YIF1B     | 3 | 14.9 | 7.7  | 7.1  | 0.6   |
| DAPK3     | 8 | 18.3 | 4.0  | 14.2 | -10.2 |
| EEF2      | 6 | 11.7 | 2.1  | 9.6  | -7.5  |
| CHAF1A    | 5 | 17.8 | 7.2  | 10.6 | -3.3  |
| UBXN6     | 8 | 19.0 | 4.1  | 14.9 | -10.8 |
| CTB-50L17 | 8 | 21.0 | 6.0  | 15.0 | -8.9  |
| SEMA6B    | 0 | 6.8  | 2.9  | 3.9  | -1.0  |
| ZNF444    | 4 | 30.8 | 8.6  | 22.2 | -13.6 |
| NXN       | 0 | 10.2 | 3.9  | 6.3  | -2.4  |
| FAM57A    | 0 | 10.6 | 4.3  | 6.3  | -2.1  |
| GLOD4     | 1 | 24.9 | 16.3 | 8.6  | 7.7   |
| MFSD3     | 2 | 30.3 | 13.9 | 16.4 | -2.5  |
| KIFC2     | 0 | 6.4  | 2.9  | 3.5  | -0.7  |
| SLC43A2   | 4 | 14.6 | 3.9  | 10.7 | -6.8  |
| WDR81     | 2 | 18.4 | 5.9  | 12.5 | -6.7  |
| SRR       | 0 | 6.9  | 2.1  | 4.8  | -2.6  |
| TSR1      | 1 | 35.0 | 24.0 | 11.0 | 13.1  |
| CYB5D2    | 0 | 13.5 | 6.5  | 7.0  | -0.5  |
| C19orf48  | 5 | 16.7 | 4.8  | 11.9 | -7.1  |
| ZNF83     | 1 | 10.1 | 5.7  | 4.4  | 1.4   |
| KRT80     | 3 | 23.5 | 15.5 | 7.9  | 7.6   |
| OTUB1     | 2 | 21.8 | 9.1  | 12.8 | -3.7  |
| CD320     | 8 | 15.7 | 3.0  | 12.6 | -9.6  |
| SPRYD3    | 2 | 13.1 | 4.7  | 8.4  | -3.7  |
| IGFBP6    | 3 | 11.3 | 4.3  | 7.1  | -2.8  |
| ZNF558    | 1 | 6.5  | 3.8  | 2.7  | 1.1   |
| NDUFV1    | 0 | 11.8 | 5.8  | 6.1  | -0.3  |
| CDK2AP2   | 0 | 9.0  | 5.1  | 3.9  | 1.1   |
| NUDT8     | 2 | 16.3 | 6.3  | 10.0 | -3.7  |
| PRDX2     | 0 | 8.2  | 3.3  | 4.9  | -1.5  |
| ZNF232    | 0 | 15.4 | 6.0  | 9.5  | -3.5  |
| MIS12     | 1 | 21.1 | 16.3 | 4.8  | 11.5  |
| HID1      | 0 | 12.4 | 4.9  | 7.5  | -2.6  |

|           |    |      |      |      |       |
|-----------|----|------|------|------|-------|
| ICT1      | 2  | 17.0 | 4.9  | 12.1 | -7.2  |
| ATP5H     | 0  | 11.2 | 4.6  | 6.6  | -2.0  |
| SRP68     | 0  | 9.3  | 3.6  | 5.7  | -2.1  |
| TK1       | 5  | 28.1 | 18.7 | 9.4  | 9.3   |
| TMEM68    | 1  | 12.8 | 10.1 | 2.6  | 7.5   |
| TMEM99    | 2  | 13.2 | 3.8  | 9.3  | -5.5  |
| GHDC      | 2  | 27.2 | 10.9 | 16.3 | -5.5  |
| FAM234A   | 0  | 8.6  | 4.2  | 4.4  | -0.1  |
| ZNF598    | 12 | 16.9 | 4.7  | 12.2 | -7.6  |
| MLST8     | 12 | 17.2 | 2.9  | 14.3 | -11.5 |
| E4F1      | 12 | 33.1 | 6.1  | 27.0 | -20.9 |
| ECI1      | 12 | 19.9 | 1.9  | 18.1 | -16.2 |
| KCTD5     | 12 | 15.4 | 3.1  | 12.4 | -9.3  |
| SRRM2     | 1  | 12.6 | 9.2  | 3.3  | 5.9   |
| SDHAF2    | 2  | 18.0 | 7.5  | 10.6 | -3.1  |
| DDB1      | 0  | 15.4 | 6.6  | 8.8  | -2.3  |
| VPS37C    | 2  | 19.9 | 8.5  | 11.3 | -2.8  |
| FTH1      | 0  | 10.6 | 4.6  | 6.1  | -1.5  |
| BSCL2     | 0  | 11.8 | 4.6  | 7.2  | -2.6  |
| POLR2G    | 0  | 16.3 | 6.4  | 9.9  | -3.6  |
| SLC3A2    | 6  | 9.7  | 2.2  | 7.5  | -5.4  |
| C11orf84  | 0  | 20.3 | 8.3  | 12.0 | -3.7  |
| ATG16L2   | 0  | 8.1  | 4.0  | 4.1  | 0.0   |
| C2CD3     | 0  | 9.9  | 3.9  | 6.0  | -2.2  |
| RPSA      | 8  | 14.9 | 1.8  | 13.1 | -11.4 |
| CTNNB1    | 1  | 14.3 | 10.4 | 3.9  | 6.4   |
| FADD      | 8  | 11.4 | 1.4  | 10.0 | -8.5  |
| LTBP3     | 0  | 9.7  | 4.5  | 5.2  | -0.7  |
| SAC3D1    | 2  | 29.6 | 12.9 | 16.7 | -3.8  |
| SF1       | 0  | 11.1 | 5.6  | 5.5  | 0.1   |
| MAP4K2    | 2  | 17.4 | 7.3  | 10.0 | -2.7  |
| SCARA3    | 0  | 7.7  | 3.3  | 4.4  | -1.1  |
| PBK       | 7  | 43.0 | 8.5  | 34.5 | -25.9 |
| COPS6     | 0  | 8.7  | 3.5  | 5.2  | -1.7  |
| PAFAH1B2  | 1  | 17.4 | 12.7 | 4.7  | 8.1   |
| ANKS3     | 11 | 10.9 | 0.9  | 10.1 | -9.2  |
| NUDT16L1  | 12 | 31.9 | 2.6  | 29.3 | -26.7 |
| KIAA1586  | 1  | 22.0 | 15.7 | 6.4  | 9.3   |
| RAB4A     | 0  | 9.6  | 3.4  | 6.2  | -2.7  |
| SETD5     | 1  | 36.7 | 31.4 | 5.3  | 26.2  |
| VASN      | 0  | 12.1 | 5.7  | 6.5  | -0.8  |
| RNF187    | 2  | 14.1 | 4.6  | 9.5  | -4.9  |
| HOOK3     | 1  | 19.1 | 14.1 | 5.0  | 9.0   |
| MAPK1IP1I | 1  | 16.4 | 10.6 | 5.7  | 4.9   |
| DDIT4     | 0  | 6.5  | 3.4  | 3.1  | 0.3   |
| RBPJ      | 1  | 28.8 | 22.3 | 6.6  | 15.7  |
| LMBRD1    | 0  | 8.8  | 3.0  | 5.8  | -2.8  |
| ZCCHC4    | 0  | 7.6  | 2.4  | 5.2  | -2.9  |
| TTC39C    | 0  | 7.2  | 3.3  | 3.8  | -0.5  |
| GLYCTK    | 4  | 34.1 | 21.3 | 12.8 | 8.6   |
| UBTD2     | 1  | 12.1 | 7.5  | 4.6  | 2.9   |
| POLR2J3   | 2  | 18.3 | 7.2  | 11.1 | -3.9  |
| NKIRAS2   | 0  | 16.1 | 6.3  | 9.9  | -3.6  |
| DNAJC7    | 1  | 69.3 | 64.0 | 5.3  | 58.7  |



|          |    |      |      |      |      |
|----------|----|------|------|------|------|
| IRF2BP2  | 0  | 9.3  | 4.5  | 4.8  | -0.3 |
| NT5DC2   | 1  | 6.6  | 3.9  | 2.7  | 1.3  |
| SMIM4    | 0  | 9.1  | 4.1  | 5.0  | -0.8 |
| COA6     | 0  | 13.7 | 4.7  | 9.0  | -4.3 |
| BMI1     | 1  | 67.0 | 60.0 | 7.0  | 53.0 |
| THAP11   | 2  | 30.5 | 14.7 | 15.8 | -1.1 |
| MMADHC   | 1  | 27.4 | 24.6 | 2.8  | 21.7 |
| PDHB     | 1  | 12.7 | 8.8  | 3.9  | 5.0  |
| PXK      | 0  | 7.4  | 2.6  | 4.8  | -2.2 |
| PCMTD1   | 1  | 14.4 | 11.3 | 3.1  | 8.1  |
| KCTD6    | 0  | 10.0 | 2.7  | 7.4  | -4.7 |
| ACOX2    | 4  | 23.7 | 14.2 | 9.5  | 4.7  |
| IRF2     | 0  | 4.8  | 1.7  | 3.1  | -1.4 |
| ARF4     | 1  | 8.4  | 4.9  | 3.5  | 1.5  |
| 2-Sep    | 1  | 14.4 | 8.1  | 6.3  | 1.7  |
| FILIP1L  | 0  | 8.5  | 2.2  | 6.3  | -4.0 |
| DTYMK    | 5  | 23.9 | 13.4 | 10.4 | 3.0  |
| TAP1     | 3  | 22.8 | 8.9  | 13.9 | -4.9 |
| ING5     | 0  | 10.9 | 4.7  | 6.2  | -1.5 |
| ATG4B    | 0  | 9.8  | 4.5  | 5.3  | -0.8 |
| MLKL     | 0  | 9.0  | 3.2  | 5.8  | -2.5 |
| RFWD3    | 0  | 13.1 | 5.6  | 7.5  | -1.9 |
| COG7     | 12 | 12.4 | 1.6  | 10.8 | -9.2 |
| CDC40    | 1  | 25.1 | 21.0 | 4.1  | 16.9 |
| STIP1    | 5  | 18.3 | 4.8  | 13.6 | -8.8 |
| RAB31    | 1  | 7.4  | 4.0  | 3.4  | 0.6  |
| REEP4    | 2  | 12.4 | 3.9  | 8.5  | -4.6 |
| BMP1     | 3  | 19.8 | 9.4  | 10.4 | -1.0 |
| ATXN2L   | 11 | 8.7  | 1.2  | 7.5  | -6.4 |
| POLR3D   | 0  | 11.0 | 5.4  | 5.6  | -0.1 |
| FEN1     | 5  | 27.1 | 16.2 | 11.0 | 5.2  |
| MTCL1    | 3  | 15.1 | 7.3  | 7.7  | -0.4 |
| FNTA     | 1  | 15.3 | 11.0 | 4.2  | 6.8  |
| SERINC2  | 0  | 20.0 | 7.3  | 12.7 | -5.4 |
| TRAPPC11 | 1  | 15.7 | 12.8 | 2.9  | 10.0 |
| ING2     | 0  | 7.8  | 2.4  | 5.4  | -3.0 |
| CDKN2AIP | 1  | 11.8 | 8.0  | 3.8  | 4.3  |
| SNRNP48  | 1  | 22.9 | 18.9 | 3.9  | 15.0 |
| TMEM223  | 2  | 39.3 | 20.7 | 18.5 | 2.2  |
| SLC20A2  | 0  | 7.8  | 3.3  | 4.5  | -1.2 |
| TMUB2    | 0  | 17.6 | 6.4  | 11.2 | -4.8 |
| STAT3    | 3  | 13.6 | 5.5  | 8.0  | -2.5 |
| ZSWIM1   | 2  | 29.0 | 12.7 | 16.2 | -3.5 |
| ADAM9    | 1  | 20.5 | 14.8 | 5.7  | 9.1  |
| NDUFS5   | 8  | 12.5 | 1.5  | 11.0 | -9.5 |
| TMEM208  | 2  | 21.4 | 10.3 | 11.1 | -0.9 |
| AHCYL1   | 1  | 12.4 | 7.5  | 4.8  | 2.7  |
| DNAJC21  | 1  | 52.1 | 44.0 | 8.1  | 35.9 |
| PKIG     | 0  | 12.1 | 5.4  | 6.8  | -1.4 |
| SEMA4C   | 0  | 18.8 | 8.9  | 9.9  | -1.0 |
| CNNM3    | 0  | 9.4  | 3.5  | 5.9  | -2.5 |
| GSTM4    | 0  | 9.5  | 4.1  | 5.3  | -1.2 |
| TCTN2    | 0  | 11.8 | 5.1  | 6.7  | -1.6 |
| PPIP5K1  | 0  | 9.8  | 4.0  | 5.9  | -1.9 |

|          |    |       |       |      |       |
|----------|----|-------|-------|------|-------|
| TSPAN5   | 3  | 14.4  | 6.1   | 8.2  | -2.1  |
| ZBTB5    | 0  | 11.4  | 5.0   | 6.4  | -1.4  |
| CHTF8    | 2  | 16.0  | 5.7   | 10.3 | -4.6  |
| ADAL     | 1  | 8.7   | 4.9   | 3.8  | 1.1   |
| LCMT2    | 2  | 18.1  | 7.5   | 10.6 | -3.1  |
| SNTB2    | 0  | 8.2   | 4.0   | 4.2  | -0.2  |
| ZNF507   | 1  | 35.5  | 31.1  | 4.4  | 26.8  |
| STX18    | 0  | 6.6   | 2.2   | 4.3  | -2.1  |
| GFM1     | 1  | 34.3  | 29.8  | 4.5  | 25.3  |
| DDX19A   | 0  | 13.1  | 6.7   | 6.4  | 0.2   |
| ATOX8    | 0  | 8.1   | 3.5   | 4.6  | -1.1  |
| ANKRD49  | 1  | 14.1  | 9.3   | 4.8  | 4.4   |
| USP39    | 0  | 15.2  | 4.4   | 10.8 | -6.5  |
| TNIP2    | 0  | 10.5  | 4.1   | 6.5  | -2.4  |
| C2orf68  | 0  | 11.5  | 4.9   | 6.6  | -1.6  |
| TMEM150A | 4  | 20.2  | 6.8   | 13.4 | -6.6  |
| RNF181   | 2  | 12.6  | 4.0   | 8.5  | -4.5  |
| VAMP5    | 0  | 12.8  | 4.7   | 8.1  | -3.3  |
| LRRC28   | 4  | 15.9  | 5.9   | 10.0 | -4.1  |
| MAT2A    | 1  | 13.1  | 9.2   | 3.9  | 5.3   |
| ZNF608   | 0  | 11.9  | 3.4   | 8.5  | -5.2  |
| SLC35G2  | 0  | 6.4   | 2.8   | 3.6  | -0.9  |
| LETM1    | 8  | 15.8  | 2.4   | 13.4 | -11.0 |
| TMEM129  | 2  | 19.3  | 7.2   | 12.1 | -5.0  |
| PPIC     | 0  | 6.4   | 3.0   | 3.3  | -0.3  |
| CEP120   | 1  | 30.9  | 26.3  | 4.6  | 21.7  |
| MFF      | 1  | 11.3  | 7.3   | 4.0  | 3.4   |
| LGALS9   | 9  | 15.7  | 1.1   | 14.7 | -13.6 |
| PXDC1    | 3  | 17.9  | 9.9   | 7.9  | 2.0   |
| E2F6     | 0  | 11.7  | 3.7   | 7.9  | -4.2  |
| FEM1B    | 1  | 25.0  | 21.6  | 3.5  | 18.1  |
| COMMD8   | 1  | 29.0  | 21.4  | 7.6  | 13.8  |
| ATP5I    | 0  | 11.4  | 4.5   | 6.8  | -2.3  |
| UQCRCF1  | 2  | 15.6  | 5.4   | 10.2 | -4.8  |
| MAP2K1   | 0  | 7.6   | 3.3   | 4.4  | -1.1  |
| HNRNP1   | 1  | 123.9 | 118.7 | 5.2  | 113.5 |
| IRS1     | 0  | 7.1   | 2.9   | 4.2  | -1.4  |
| MECP2    | 0  | 9.2   | 4.2   | 5.0  | -0.8  |
| UPF3A    | 1  | 12.6  | 9.1   | 3.4  | 5.7   |
| DHRX     | 2  | 11.7  | 3.3   | 8.5  | -5.2  |
| ASMTL    | 0  | 9.6   | 4.8   | 4.7  | 0.1   |
| SLC25A6  | 0  | 7.7   | 3.1   | 4.7  | -1.6  |
| CHST14   | 0  | 9.8   | 5.1   | 4.7  | 0.4   |
| CSNK1G1  | 0  | 6.4   | 2.6   | 3.8  | -1.2  |
| ATF5     | 2  | 11.7  | 4.0   | 7.7  | -3.6  |
| UBE2V2   | 1  | 77.9  | 73.2  | 4.6  | 68.6  |
| ZBTB43   | 1  | 12.8  | 9.2   | 3.6  | 5.6   |
| PCSK9    | 4  | 19.0  | 8.9   | 10.1 | -1.2  |
| XPO6     | 6  | 11.4  | 3.1   | 8.3  | -5.2  |
| APEX2    | 0  | 12.5  | 5.7   | 6.8  | -1.1  |
| NSMCE1   | 0  | 7.5   | 3.2   | 4.4  | -1.2  |
| CCDC126  | 0  | 5.8   | 2.3   | 3.4  | -1.1  |
| CD2BP2   | 11 | 24.7  | 5.6   | 19.1 | -13.5 |
| RGS14    | 0  | 17.0  | 5.4   | 11.6 | -6.2  |

|          |    |      |      |      |       |
|----------|----|------|------|------|-------|
| TBC1D10B | 11 | 25.0 | 4.5  | 20.5 | -16.1 |
| LMAN2    | 0  | 14.4 | 5.4  | 9.1  | -3.7  |
| RAB24    | 2  | 17.2 | 6.7  | 10.5 | -3.8  |
| PRELID1  | 0  | 19.0 | 7.5  | 11.5 | -4.0  |
| THBS3    | 0  | 7.6  | 3.8  | 3.8  | 0.0   |
| SLC50A1  | 9  | 16.8 | 3.0  | 13.8 | -10.8 |
| EFNA1    | 4  | 11.5 | 3.5  | 8.0  | -4.5  |
| ZRSR2    | 0  | 8.9  | 3.4  | 5.5  | -2.2  |
| NMD3     | 1  | 34.0 | 31.5 | 2.4  | 29.1  |
| B3GALNT1 | 0  | 4.8  | 1.7  | 3.1  | -1.4  |
| GPRIN1   | 2  | 28.1 | 12.9 | 15.2 | -2.2  |
| MRPL1    | 1  | 42.2 | 32.3 | 9.8  | 22.5  |
| PGM2     | 1  | 20.9 | 14.9 | 6.0  | 8.9   |
| SLC33A1  | 0  | 10.4 | 3.4  | 7.0  | -3.7  |
| SNUPN    | 0  | 11.2 | 3.9  | 7.3  | -3.4  |
| CRADD    | 2  | 16.5 | 6.3  | 10.2 | -3.8  |
| SIN3A    | 0  | 8.1  | 3.0  | 5.1  | -2.1  |
| ARL13B   | 1  | 19.1 | 16.1 | 3.0  | 13.1  |
| PTK2     | 1  | 40.6 | 37.0 | 3.6  | 33.4  |
| PTPN9    | 0  | 6.5  | 3.2  | 3.3  | -0.2  |
| CXCL8    | 0  | 6.3  | 2.9  | 3.4  | -0.5  |
| SDC2     | 0  | 5.3  | 2.6  | 2.7  | 0.0   |
| MMGT1    | 0  | 12.4 | 3.2  | 9.2  | -6.0  |
| TM2D2    | 0  | 7.1  | 3.0  | 4.1  | -1.1  |
| PLEKHA2  | 0  | 8.6  | 2.4  | 6.1  | -3.7  |
| CLIC4    | 1  | 25.5 | 19.5 | 6.0  | 13.4  |
| PCBP1    | 2  | 13.9 | 4.0  | 9.9  | -5.9  |
| HINT1    | 6  | 18.1 | 5.5  | 12.6 | -7.1  |
| INO80E   | 11 | 18.4 | 4.2  | 14.2 | -10.0 |
| NFU1     | 1  | 47.7 | 37.7 | 10.0 | 27.7  |
| ANTXR1   | 3  | 15.5 | 5.3  | 10.2 | -5.0  |
| CKAP2L   | 7  | 32.5 | 4.8  | 27.7 | -22.9 |
| C15orf40 | 0  | 8.6  | 2.6  | 6.0  | -3.5  |
| FAM103A1 | 4  | 10.8 | 3.0  | 7.9  | -4.9  |
| BOLA2B   | 2  | 26.0 | 11.2 | 14.8 | -3.6  |
| LUZP1    | 3  | 14.2 | 7.1  | 7.1  | 0.0   |
| HEXDC    | 0  | 11.5 | 4.4  | 7.1  | -2.6  |
| BUB1     | 5  | 41.0 | 7.6  | 33.3 | -25.7 |
| SPNS1    | 11 | 20.7 | 2.1  | 18.6 | -16.6 |
| LRRC45   | 2  | 27.7 | 12.2 | 15.6 | -3.4  |
| CHRNA5   | 0  | 8.5  | 2.5  | 5.9  | -3.4  |
| STRA13   | 5  | 19.8 | 4.7  | 15.1 | -10.3 |
| AGPAT2   | 10 | 14.9 | 2.1  | 12.7 | -10.6 |
| ASPSR1   | 0  | 10.9 | 4.5  | 6.4  | -1.9  |
| FASN     | 4  | 14.4 | 4.3  | 10.1 | -5.8  |
| CNBP     | 1  | 45.2 | 42.2 | 3.0  | 39.2  |
| MT1E     | 3  | 12.3 | 5.6  | 6.7  | -1.1  |
| DUS1L    | 2  | 16.6 | 5.6  | 11.1 | -5.5  |
| GPS1     | 2  | 17.5 | 5.9  | 11.6 | -5.7  |
| RFNG     | 0  | 7.8  | 3.7  | 4.1  | -0.5  |
| DCXR     | 5  | 16.5 | 3.1  | 13.5 | -10.4 |
| ZNF32    | 0  | 11.7 | 5.4  | 6.3  | -0.9  |
| RAC3     | 2  | 13.4 | 5.3  | 8.1  | -2.8  |
| LIMS1    | 1  | 13.8 | 7.9  | 6.0  | 1.9   |

|           |    |       |       |      |       |
|-----------|----|-------|-------|------|-------|
| TAPT1     | 1  | 8.9   | 5.6   | 3.3  | 2.2   |
| UGP2      | 1  | 88.6  | 83.6  | 5.0  | 78.5  |
| HNRNPF    | 0  | 7.9   | 2.9   | 5.1  | -2.2  |
| BTD       | 0  | 8.2   | 3.8   | 4.4  | -0.6  |
| CSGALNACT | 1  | 16.6  | 9.2   | 7.4  | 1.8   |
| ROBO1     | 0  | 12.4  | 3.6   | 8.8  | -5.2  |
| AVEN      | 0  | 5.7   | 2.6   | 3.2  | -0.6  |
| TRIM56    | 3  | 11.5  | 4.4   | 7.0  | -2.6  |
| SYAP1     | 1  | 36.4  | 28.1  | 8.3  | 19.8  |
| TPST1     | 0  | 7.0   | 3.7   | 3.3  | 0.4   |
| TM4SF4    | 4  | 14.3  | 5.0   | 9.3  | -4.2  |
| TOR1AIP2  | 1  | 13.6  | 9.9   | 3.7  | 6.1   |
| TM4SF1    | 0  | 10.0  | 4.9   | 5.0  | -0.1  |
| GUSB      | 0  | 10.2  | 3.8   | 6.4  | -2.6  |
| BRD3      | 0  | 10.4  | 4.8   | 5.6  | -0.7  |
| KLF13     | 4  | 11.0  | 2.7   | 8.3  | -5.6  |
| ZNF768    | 11 | 24.7  | 4.7   | 20.1 | -15.4 |
| TMEM42    | 2  | 26.8  | 7.4   | 19.4 | -11.9 |
| MAP3K2    | 1  | 16.0  | 13.0  | 3.1  | 9.9   |
| PUSL1     | 2  | 33.9  | 17.8  | 16.0 | 1.8   |
| SF3B5     | 2  | 13.7  | 4.9   | 8.8  | -3.9  |
| IFFO2     | 3  | 9.9   | 4.3   | 5.6  | -1.3  |
| NLGN2     | 0  | 10.1  | 5.5   | 4.7  | 0.8   |
| CHD3      | 1  | 12.6  | 8.8   | 3.8  | 5.1   |
| ALCAM     | 1  | 13.1  | 7.8   | 5.3  | 2.5   |
| YWHAG     | 0  | 6.2   | 2.3   | 3.9  | -1.6  |
| UBE2E3    | 3  | 8.8   | 3.4   | 5.4  | -2.0  |
| CNTROB    | 0  | 8.8   | 3.4   | 5.4  | -2.0  |
| TRAPPC1   | 6  | 23.7  | 7.3   | 16.4 | -9.1  |
| SIMC1     | 0  | 11.3  | 4.1   | 7.2  | -3.1  |
| TMEM192   | 0  | 7.5   | 2.4   | 5.1  | -2.8  |
| SERPINA6  | 4  | 26.1  | 16.5  | 9.6  | 6.9   |
| NIPA1     | 4  | 10.0  | 2.5   | 7.4  | -4.9  |
| UBE2E1    | 1  | 22.0  | 19.1  | 2.9  | 16.2  |
| HNRNPA3   | 1  | 112.4 | 102.5 | 10.0 | 92.5  |
| SIK2      | 0  | 7.5   | 3.8   | 3.7  | 0.0   |
| CHRN1     | 0  | 8.4   | 4.5   | 3.9  | 0.5   |
| PWWP2A    | 1  | 10.7  | 7.3   | 3.4  | 3.8   |
| USP47     | 1  | 72.5  | 64.9  | 7.6  | 57.3  |
| PDCD6IP   | 1  | 74.4  | 69.0  | 5.4  | 63.6  |
| ZNF212    | 2  | 25.0  | 11.4  | 13.6 | -2.2  |
| ZNF282    | 2  | 11.8  | 3.7   | 8.1  | -4.4  |
| GLB1      | 0  | 9.2   | 3.6   | 5.6  | -2.0  |
| C14orf142 | 1  | 12.4  | 7.4   | 5.0  | 2.3   |
| CRTAP     | 3  | 10.2  | 3.4   | 6.8  | -3.3  |
| ELP5      | 4  | 10.7  | 2.2   | 8.5  | -6.3  |
| CMTM8     | 4  | 26.0  | 12.8  | 13.3 | -0.5  |
| GABARAP   | 0  | 9.1   | 5.0   | 4.1  | 1.0   |
| STX8      | 0  | 7.7   | 3.6   | 4.0  | -0.4  |
| CDK1      | 5  | 53.9  | 9.0   | 44.8 | -35.8 |
| UBB       | 0  | 6.0   | 3.2   | 2.8  | 0.4   |
| NFRKB     | 2  | 26.1  | 11.9  | 14.2 | -2.3  |
| B3GNT2    | 1  | 8.8   | 5.2   | 3.7  | 1.5   |
| TMED10    | 0  | 8.9   | 3.3   | 5.6  | -2.3  |

|           |    |       |       |      |       |
|-----------|----|-------|-------|------|-------|
| SETMAR    | 0  | 7.8   | 3.4   | 4.3  | -0.9  |
| SMAD1     | 1  | 7.0   | 3.9   | 3.1  | 0.8   |
| SLC30A1   | 1  | 7.8   | 4.2   | 3.6  | 0.5   |
| GPRC5C    | 4  | 12.4  | 3.7   | 8.7  | -5.0  |
| TMEM182   | 1  | 17.1  | 11.6  | 5.6  | 6.0   |
| KRT8      | 0  | 9.6   | 5.2   | 4.3  | 0.9   |
| ADORA2B   | 3  | 14.7  | 5.4   | 9.4  | -4.0  |
| MGMT      | 2  | 22.4  | 9.9   | 12.5 | -2.6  |
| METTL7B   | 4  | 36.9  | 22.4  | 14.5 | 7.9   |
| HARS      | 0  | 10.6  | 4.1   | 6.5  | -2.3  |
| NFXL1     | 1  | 20.2  | 15.4  | 4.8  | 10.5  |
| DENND5B   | 1  | 12.6  | 7.8   | 4.8  | 2.9   |
| DNAJC18   | 1  | 15.8  | 9.9   | 5.9  | 4.0   |
| C14orf169 | 2  | 35.1  | 18.3  | 16.8 | 1.5   |
| SPATA24   | 2  | 21.9  | 10.1  | 11.8 | -1.7  |
| RALGAPB   | 1  | 32.3  | 28.1  | 4.2  | 23.9  |
| PYM1      | 4  | 19.3  | 5.3   | 13.9 | -8.6  |
| NPAS2     | 0  | 7.3   | 3.3   | 4.0  | -0.6  |
| NUDT9     | 1  | 11.6  | 8.7   | 2.9  | 5.8   |
| PA2G4     | 5  | 20.6  | 3.7   | 16.9 | -13.2 |
| ELOVL6    | 1  | 8.4   | 5.0   | 3.4  | 1.6   |
| PFKFB3    | 0  | 7.4   | 3.0   | 4.3  | -1.3  |
| ARL6IP1   | 1  | 34.0  | 29.0  | 5.0  | 24.1  |
| SMAGP     | 2  | 12.3  | 3.7   | 8.6  | -4.9  |
| CDH2      | 3  | 13.5  | 7.3   | 6.2  | 1.1   |
| STAT2     | 0  | 9.3   | 4.7   | 4.7  | 0.0   |
| NUDCD2    | 6  | 33.7  | 10.4  | 23.3 | -12.9 |
| IRF2BP1   | 2  | 33.7  | 16.3  | 17.4 | -1.1  |
| HSPA4     | 1  | 63.8  | 58.2  | 5.7  | 52.5  |
| COMM5     | 13 | 19.1  | 3.8   | 15.2 | -11.4 |
| ARMC10    | 0  | 8.4   | 3.0   | 5.3  | -2.3  |
| RNF34     | 0  | 12.5  | 3.8   | 8.7  | -4.8  |
| ACYP2     | 0  | 12.5  | 5.2   | 7.3  | -2.1  |
| TRABD     | 2  | 20.7  | 9.9   | 10.8 | -0.9  |
| ATF7      | 0  | 7.1   | 2.8   | 4.3  | -1.4  |
| SOCS6     | 0  | 5.4   | 2.1   | 3.4  | -1.3  |
| POLH      | 0  | 9.2   | 2.6   | 6.6  | -4.0  |
| KIF5B     | 1  | 131.4 | 122.8 | 8.6  | 114.3 |
| AKAP13    | 0  | 9.7   | 3.2   | 6.5  | -3.3  |
| CDCA4     | 5  | 16.3  | 3.5   | 12.8 | -9.3  |
| CHCHD7    | 1  | 11.6  | 7.3   | 4.2  | 3.1   |
| FOXN2     | 1  | 25.7  | 18.9  | 6.8  | 12.2  |
| USP32     | 1  | 17.8  | 14.7  | 3.1  | 11.6  |
| PPM1D     | 0  | 8.4   | 3.1   | 5.3  | -2.2  |
| KBTD2     | 1  | 17.4  | 14.3  | 3.1  | 11.3  |
| MINA      | 1  | 13.9  | 10.6  | 3.4  | 7.2   |
| TRIAP1    | 0  | 12.7  | 4.4   | 8.3  | -4.0  |
| LSM3      | 0  | 10.7  | 4.4   | 6.3  | -1.9  |
| KIAA0232  | 1  | 10.6  | 7.2   | 3.4  | 3.8   |
| MTSS1     | 4  | 10.0  | 3.3   | 6.6  | -3.3  |
| TMEM43    | 0  | 7.1   | 3.6   | 3.5  | 0.0   |
| RNF139    | 1  | 7.5   | 4.2   | 3.2  | 1.0   |
| RPS9      | 2  | 22.0  | 9.3   | 12.7 | -3.4  |
| TSEN34    | 2  | 14.2  | 4.6   | 9.7  | -5.1  |

|           |    |      |      |      |       |
|-----------|----|------|------|------|-------|
| GSTA4     | 0  | 12.7 | 4.5  | 8.2  | -3.7  |
| MSANTD4   | 1  | 22.2 | 18.8 | 3.4  | 15.4  |
| NDUFA3    | 0  | 6.5  | 2.9  | 3.6  | -0.7  |
| NUDT6     | 3  | 9.2  | 2.4  | 6.8  | -4.4  |
| TANC2     | 3  | 11.0 | 4.0  | 7.0  | -2.9  |
| DNAJC24   | 1  | 16.9 | 14.2 | 2.7  | 11.5  |
| PRKCDBP   | 3  | 8.7  | 3.5  | 5.2  | -1.7  |
| TSNARE1   | 0  | 8.0  | 3.7  | 4.3  | -0.6  |
| FEZ2      | 1  | 14.4 | 8.0  | 6.4  | 1.5   |
| C11orf24  | 0  | 6.6  | 3.2  | 3.4  | -0.2  |
| CCBL1     | 2  | 11.9 | 3.6  | 8.2  | -4.6  |
| TRMT61B   | 1  | 23.0 | 17.2 | 5.9  | 11.3  |
| MFN1      | 1  | 71.0 | 66.2 | 4.8  | 61.5  |
| ATP6VOE2  | 0  | 10.8 | 4.1  | 6.7  | -2.7  |
| JAGN1     | 4  | 13.9 | 3.5  | 10.4 | -6.9  |
| TADA3     | 0  | 11.6 | 4.7  | 6.9  | -2.2  |
| SOCS5     | 1  | 18.0 | 13.3 | 4.7  | 8.6   |
| C1GALT1C1 | 1  | 9.6  | 5.3  | 4.3  | 1.1   |
| C9orf16   | 2  | 20.4 | 7.0  | 13.4 | -6.5  |
| MORN4     | 0  | 11.7 | 5.4  | 6.2  | -0.8  |
| ZNF672    | 2  | 22.7 | 9.2  | 13.5 | -4.3  |
| ZNF692    | 2  | 13.0 | 4.0  | 9.0  | -5.0  |
| NAIF1     | 0  | 10.8 | 5.5  | 5.3  | 0.2   |
| TMEM126A  | 7  | 14.9 | 1.5  | 13.5 | -12.0 |
| TMEM126B  | 1  | 20.7 | 15.8 | 4.9  | 10.8  |
| TRIM8     | 3  | 12.9 | 5.1  | 7.9  | -2.8  |
| SCAND1    | 2  | 25.9 | 11.9 | 14.0 | -2.0  |
| JUNB      | 0  | 10.0 | 3.7  | 6.2  | -2.5  |
| C10orf35  | 0  | 10.5 | 4.8  | 5.8  | -1.0  |
| TMEM37    | 4  | 14.9 | 6.5  | 8.4  | -1.9  |
| UGT2B7    | 4  | 9.0  | 3.2  | 5.7  | -2.5  |
| SHCBP1    | 5  | 10.8 | 1.5  | 9.2  | -7.7  |
| FAM98B    | 6  | 64.7 | 7.6  | 57.1 | -49.5 |
| GAA       | 0  | 12.8 | 5.2  | 7.6  | -2.4  |
| CANT1     | 9  | 17.4 | 0.9  | 16.5 | -15.6 |
| ZDHHC16   | 0  | 14.4 | 7.1  | 7.3  | -0.2  |
| CHST11    | 3  | 11.0 | 4.3  | 6.7  | -2.5  |
| EXOSC1    | 0  | 12.3 | 5.8  | 6.5  | -0.6  |
| PGAM1     | 0  | 11.3 | 4.9  | 6.4  | -1.4  |
| CHD7      | 1  | 14.0 | 7.7  | 6.4  | 1.3   |
| ESCO2     | 7  | 29.7 | 5.0  | 24.6 | -19.6 |
| KRT19     | 0  | 5.6  | 2.4  | 3.2  | -0.8  |
| MRPL36    | 10 | 9.1  | 0.8  | 8.3  | -7.5  |
| ZNF581    | 0  | 13.6 | 6.1  | 7.4  | -1.3  |
| KRT20     | 0  | 13.1 | 5.4  | 7.6  | -2.2  |
| ZNF524    | 2  | 39.6 | 19.0 | 20.6 | -1.6  |
| POLR1C    | 0  | 12.7 | 4.9  | 7.9  | -3.0  |
| ASXL1     | 1  | 16.1 | 9.1  | 7.0  | 2.1   |
| ZNF562    | 0  | 8.8  | 3.5  | 5.3  | -1.7  |
| ZNF318    | 0  | 7.4  | 3.6  | 3.8  | -0.2  |
| ZNF561    | 1  | 14.3 | 10.2 | 4.1  | 6.1   |
| WIPF2     | 0  | 19.1 | 8.4  | 10.8 | -2.4  |
| RSL1D1    | 1  | 75.7 | 70.1 | 5.6  | 64.5  |
| LRRC8D    | 1  | 10.5 | 6.4  | 4.1  | 2.2   |

|           |   |      |      |      |       |
|-----------|---|------|------|------|-------|
| PPID      | 1 | 31.1 | 26.1 | 5.0  | 21.1  |
| ETFDH     | 1 | 10.1 | 5.3  | 4.8  | 0.5   |
| TBCA      | 1 | 18.6 | 11.7 | 6.9  | 4.8   |
| BCL2L1    | 0 | 11.5 | 4.2  | 7.3  | -3.1  |
| FGG       | 4 | 16.6 | 9.5  | 7.1  | 2.4   |
| FGA       | 4 | 21.0 | 13.6 | 7.4  | 6.2   |
| FGB       | 4 | 12.7 | 6.0  | 6.7  | -0.7  |
| PLRG1     | 1 | 45.2 | 40.4 | 4.7  | 35.7  |
| RAB4B-EGF | 0 | 5.6  | 2.5  | 3.1  | -0.6  |
| ZNF584    | 2 | 21.9 | 8.8  | 13.1 | -4.3  |
| CLSTN1    | 3 | 12.8 | 5.3  | 7.5  | -2.2  |
| CXXC5     | 0 | 5.1  | 2.2  | 2.9  | -0.7  |
| ZNF274    | 0 | 7.8  | 3.1  | 4.7  | -1.6  |
| SLC25A33  | 2 | 26.9 | 10.2 | 16.7 | -6.5  |
| ENC1      | 3 | 7.6  | 2.5  | 5.1  | -2.6  |
| SPSB1     | 3 | 10.9 | 3.7  | 7.2  | -3.6  |
| BPTF      | 1 | 60.2 | 55.5 | 4.7  | 50.8  |
| ATF7IP    | 1 | 17.3 | 12.7 | 4.6  | 8.0   |
| RGS19     | 0 | 9.0  | 3.6  | 5.4  | -1.8  |
| TCEA2     | 0 | 9.7  | 4.4  | 5.2  | -0.8  |
| HDAC3     | 0 | 9.6  | 4.3  | 5.3  | -1.0  |
| GPHN      | 1 | 10.3 | 5.1  | 5.2  | -0.1  |
| TMEM51    | 2 | 16.8 | 4.6  | 12.2 | -7.7  |
| CAMTA1    | 0 | 7.3  | 2.7  | 4.5  | -1.8  |
| LGALS4    | 4 | 15.2 | 5.5  | 9.7  | -4.3  |
| PAH       | 4 | 19.8 | 11.6 | 8.2  | 3.4   |
| SPATA5L1  | 4 | 12.6 | 2.7  | 9.9  | -7.2  |
| GATM      | 4 | 10.2 | 4.0  | 6.2  | -2.1  |
| RHNO1     | 5 | 17.7 | 5.1  | 12.5 | -7.4  |
| CTPS1     | 5 | 21.8 | 3.6  | 18.2 | -14.7 |
| METTL18   | 1 | 8.9  | 5.3  | 3.6  | 1.7   |
| FBXL14    | 2 | 15.6 | 5.1  | 10.5 | -5.4  |
| EXOSC10   | 7 | 12.7 | 1.5  | 11.2 | -9.7  |
| MLLT3     | 0 | 5.4  | 1.6  | 3.8  | -2.1  |
| RRM2      | 5 | 27.7 | 18.7 | 8.9  | 9.8   |
| TRAPPC12  | 0 | 7.4  | 3.1  | 4.3  | -1.2  |
| RPS21     | 0 | 14.3 | 4.7  | 9.7  | -5.0  |
| RNMTL1    | 2 | 23.7 | 7.2  | 16.5 | -9.3  |
| PTEN      | 1 | 17.8 | 13.8 | 4.0  | 9.8   |
| RPS7      | 0 | 11.8 | 3.6  | 8.2  | -4.6  |
| RNASEH1   | 0 | 7.7  | 3.3  | 4.4  | -1.0  |
| PRNP      | 0 | 10.9 | 2.3  | 8.6  | -6.3  |
| TLN2      | 0 | 8.1  | 4.3  | 3.8  | 0.6   |
| TVP23B    | 1 | 11.9 | 8.8  | 3.1  | 5.7   |
| ZNF217    | 1 | 17.4 | 15.1 | 2.3  | 12.8  |
| ATPAF2    | 0 | 10.2 | 3.9  | 6.3  | -2.4  |
| PPIH      | 5 | 15.3 | 3.6  | 11.6 | -8.0  |
| C20orf196 | 2 | 12.5 | 4.4  | 8.2  | -3.8  |
| JMJD1C    | 1 | 39.3 | 34.5 | 4.8  | 29.6  |
| SYNPO     | 3 | 11.6 | 4.8  | 6.8  | -2.0  |
| THOP1     | 8 | 21.7 | 5.5  | 16.2 | -10.7 |
| LAMB2     | 1 | 9.4  | 5.4  | 4.0  | 1.4   |
| USP19     | 0 | 12.6 | 6.2  | 6.4  | -0.1  |
| QARS      | 0 | 10.2 | 4.4  | 5.9  | -1.5  |

|         |   |      |      |      |       |
|---------|---|------|------|------|-------|
| ORMDL3  | 0 | 12.2 | 5.2  | 7.0  | -1.9  |
| KLF11   | 3 | 8.6  | 2.7  | 5.9  | -3.3  |
| SMN1    | 2 | 14.6 | 4.4  | 10.1 | -5.7  |
| EIF2AK3 | 1 | 17.0 | 13.8 | 3.1  | 10.7  |
| MOB3A   | 8 | 17.1 | 3.0  | 14.1 | -11.1 |
| KRCC1   | 1 | 7.2  | 3.7  | 3.5  | 0.2   |
| NME6    | 0 | 11.6 | 5.2  | 6.4  | -1.2  |
| CYCS    | 1 | 43.9 | 35.3 | 8.6  | 26.7  |
| SNTB1   | 4 | 13.2 | 4.8  | 8.4  | -3.6  |
| MTBP    | 1 | 18.5 | 13.3 | 5.2  | 8.1   |
| TEFM    | 1 | 14.4 | 10.3 | 4.0  | 6.3   |
| MRPL13  | 1 | 31.8 | 24.4 | 7.5  | 16.9  |
| MALT1   | 1 | 11.6 | 8.1  | 3.5  | 4.6   |
| ISG20   | 4 | 11.2 | 2.9  | 8.3  | -5.4  |
| CEBPB   | 2 | 15.0 | 5.6  | 9.4  | -3.7  |
| PAIP1   | 1 | 19.3 | 16.0 | 3.2  | 12.8  |
| ZNF131  | 1 | 41.9 | 36.7 | 5.2  | 31.4  |
| DPAGT1  | 0 | 11.3 | 4.5  | 6.8  | -2.3  |
| BSG     | 8 | 15.6 | 5.8  | 9.8  | -4.0  |
| HINFP   | 0 | 15.3 | 6.5  | 8.8  | -2.2  |
| SPTLC3  | 4 | 7.2  | 2.5  | 4.7  | -2.1  |
| COPRS   | 0 | 13.2 | 5.9  | 7.3  | -1.3  |
| TP53RK  | 0 | 14.7 | 6.8  | 7.9  | -1.1  |
| BPGM    | 0 | 7.5  | 1.9  | 5.6  | -3.7  |
| POP7    | 2 | 24.7 | 8.5  | 16.2 | -7.8  |
| ALG14   | 0 | 6.6  | 2.3  | 4.3  | -2.1  |
| SUCLG2  | 0 | 8.9  | 3.6  | 5.3  | -1.6  |
| GNB2    | 3 | 12.5 | 4.3  | 8.2  | -3.9  |
| FAM195A | 4 | 27.4 | 10.3 | 17.1 | -6.7  |
| C2CD2L  | 2 | 22.0 | 9.8  | 12.2 | -2.4  |
| GNG12   | 3 | 23.4 | 10.0 | 13.4 | -3.3  |
| CLP1    | 0 | 14.2 | 5.3  | 8.9  | -3.6  |
| MYEOV2  | 2 | 10.5 | 3.5  | 7.0  | -3.5  |
| GTPBP2  | 0 | 11.2 | 5.1  | 6.1  | -1.0  |
| FGGY    | 0 | 7.9  | 3.1  | 4.8  | -1.6  |
| TCEAL1  | 0 | 8.1  | 3.0  | 5.1  | -2.1  |
| ZNF24   | 1 | 31.1 | 27.8 | 3.3  | 24.5  |
| AFF1    | 0 | 9.7  | 3.6  | 6.1  | -2.4  |
| FIBP    | 0 | 9.6  | 3.9  | 5.7  | -1.8  |
| BANP    | 2 | 28.6 | 13.4 | 15.2 | -1.8  |
| PPP1CA  | 0 | 15.0 | 7.7  | 7.4  | 0.3   |
| HCFC1   | 0 | 17.4 | 5.8  | 11.6 | -5.8  |
| CHCHD1  | 0 | 13.6 | 4.8  | 8.7  | -3.9  |
| MRPL52  | 6 | 9.8  | 2.0  | 7.8  | -5.9  |
| RND1    | 4 | 8.5  | 2.4  | 6.1  | -3.7  |
| RAD9A   | 0 | 10.6 | 6.0  | 4.6  | 1.4   |
| EFEMP2  | 0 | 8.4  | 4.0  | 4.4  | -0.5  |
| FAM21C  | 0 | 6.5  | 3.2  | 3.3  | -0.1  |
| TMEM134 | 0 | 10.4 | 5.1  | 5.3  | -0.2  |
| CORO1B  | 0 | 9.8  | 5.2  | 4.6  | 0.5   |
| FUT10   | 0 | 8.5  | 2.9  | 5.6  | -2.7  |
| LRRC20  | 0 | 15.9 | 5.7  | 10.2 | -4.5  |
| MUS81   | 0 | 8.8  | 3.1  | 5.7  | -2.6  |
| CFL1    | 3 | 13.2 | 4.0  | 9.2  | -5.2  |



|          |    |      |      |      |       |
|----------|----|------|------|------|-------|
| TMCC1    | 1  | 11.1 | 5.4  | 5.8  | -0.4  |
| NAA16    | 1  | 16.1 | 12.0 | 4.1  | 8.0   |
| FAM192A  | 6  | 10.9 | 1.8  | 9.1  | -7.3  |
| RAB43    | 2  | 29.1 | 10.0 | 19.0 | -9.0  |
| CBWD1    | 0  | 7.7  | 2.8  | 4.9  | -2.1  |
| DCP2     | 1  | 10.9 | 6.3  | 4.7  | 1.6   |
| SNX32    | 6  | 31.8 | 8.2  | 23.6 | -15.3 |
| RPL38    | 0  | 9.2  | 3.3  | 5.9  | -2.6  |
| RARG     | 0  | 8.8  | 4.1  | 4.7  | -0.6  |
| SSH3     | 0  | 8.8  | 4.0  | 4.8  | -0.7  |
| CES2     | 2  | 13.7 | 5.6  | 8.1  | -2.5  |
| PDP2     | 0  | 11.2 | 5.3  | 5.9  | -0.6  |
| SP3      | 1  | 80.6 | 76.2 | 4.4  | 71.8  |
| DMXL1    | 1  | 32.0 | 25.2 | 6.8  | 18.4  |
| METAP1D  | 0  | 7.6  | 2.9  | 4.7  | -1.9  |
| ZNF621   | 1  | 10.5 | 6.2  | 4.2  | 2.0   |
| EGFL7    | 0  | 8.4  | 3.4  | 5.0  | -1.6  |
| NADSYN1  | 0  | 8.8  | 3.5  | 5.3  | -1.7  |
| DHCR7    | 4  | 11.6 | 2.8  | 8.8  | -6.0  |
| RNASEH2C | 2  | 17.3 | 6.6  | 10.7 | -4.1  |
| MYEOV    | 3  | 7.6  | 2.4  | 5.2  | -2.8  |
| ANKRD13D | 0  | 10.0 | 5.9  | 4.2  | 1.7   |
| MYD88    | 0  | 11.6 | 5.4  | 6.3  | -0.9  |
| OXSRI    | 1  | 12.5 | 9.4  | 3.1  | 6.4   |
| PHF8     | 0  | 9.2  | 4.8  | 4.4  | 0.4   |
| LCLAT1   | 0  | 6.1  | 2.2  | 4.0  | -1.8  |
| KAT5     | 0  | 9.5  | 4.4  | 5.1  | -0.7  |
| DCAKD    | 2  | 19.9 | 7.9  | 12.0 | -4.1  |
| TADA2B   | 8  | 13.1 | 2.2  | 10.8 | -8.6  |
| ADRBK1   | 0  | 7.4  | 3.7  | 3.8  | -0.1  |
| RELA     | 0  | 11.5 | 4.8  | 6.8  | -2.0  |
| HECTD4   | 0  | 7.5  | 3.2  | 4.3  | -1.1  |
| FAM222B  | 0  | 16.6 | 6.2  | 10.4 | -4.3  |
| COQ2     | 0  | 9.1  | 3.5  | 5.6  | -2.1  |
| TRMT112  | 0  | 10.1 | 4.5  | 5.6  | -1.2  |
| KDM2A    | 0  | 10.1 | 6.2  | 4.0  | 2.2   |
| ADCK5    | 13 | 30.3 | 2.6  | 27.7 | -25.1 |
| MRPL57   | 2  | 23.5 | 9.8  | 13.7 | -3.8  |
| NOC3L    | 1  | 36.6 | 28.1 | 8.5  | 19.7  |
| ESRRA    | 2  | 26.4 | 10.9 | 15.5 | -4.6  |
| RHOD     | 0  | 10.8 | 4.3  | 6.6  | -2.3  |
| COMMD1   | 0  | 10.0 | 4.0  | 6.0  | -2.0  |
| RAPH1    | 0  | 5.7  | 1.9  | 3.8  | -1.9  |
| MTX1     | 9  | 20.6 | 6.3  | 14.4 | -8.1  |
| PARP14   | 1  | 11.8 | 5.5  | 6.3  | -0.8  |
| CKS1B    | 5  | 29.0 | 18.7 | 10.2 | 8.5   |
| AHSA2    | 1  | 20.1 | 16.7 | 3.4  | 13.3  |
| ABLIM3   | 3  | 11.4 | 5.0  | 6.5  | -1.5  |
| VANGL1   | 3  | 10.1 | 3.4  | 6.7  | -3.3  |
| GLRX     | 0  | 7.6  | 3.3  | 4.3  | -1.0  |
| IQCB1    | 1  | 23.2 | 18.9 | 4.3  | 14.6  |
| GOLGB1   | 1  | 25.2 | 21.7 | 3.6  | 18.1  |
| GPR137   | 0  | 9.4  | 4.2  | 5.3  | -1.1  |
| SNCG     | 9  | 10.5 | 1.1  | 9.3  | -8.2  |

|           |    |      |      |      |       |
|-----------|----|------|------|------|-------|
| MZT2A     | 2  | 13.6 | 4.6  | 9.0  | -4.5  |
| TNKS      | 0  | 9.0  | 4.8  | 4.1  | 0.7   |
| MAP3K11   | 2  | 28.7 | 10.4 | 18.3 | -7.8  |
| TRIB1     | 4  | 9.3  | 3.1  | 6.3  | -3.2  |
| DAG1      | 0  | 8.7  | 4.4  | 4.3  | 0.1   |
| ARV1      | 0  | 7.6  | 2.5  | 5.1  | -2.5  |
| NAA20     | 1  | 25.3 | 19.0 | 6.3  | 12.8  |
| MINOS1    | 6  | 24.5 | 10.3 | 14.2 | -3.9  |
| EHBP1L1   | 3  | 15.8 | 5.0  | 10.8 | -5.8  |
| RNF26     | 11 | 23.3 | 1.8  | 21.5 | -19.8 |
| PPP1R14B  | 0  | 15.2 | 5.8  | 9.4  | -3.6  |
| SSSCA1    | 0  | 17.8 | 7.1  | 10.7 | -3.6  |
| SMARCC1   | 0  | 12.7 | 4.7  | 8.0  | -3.2  |
| PTPRM     | 3  | 7.8  | 2.6  | 5.3  | -2.7  |
| FKBP2     | 0  | 12.0 | 4.9  | 7.2  | -2.3  |
| VEGFB     | 0  | 6.7  | 3.4  | 3.3  | 0.1   |
| PEAK1     | 0  | 9.8  | 4.1  | 5.6  | -1.5  |
| TNFRSF10I | 0  | 8.5  | 4.3  | 4.1  | 0.2   |
| MST1      | 4  | 16.7 | 6.4  | 10.3 | -3.9  |
| GMPPB     | 2  | 20.5 | 7.9  | 12.6 | -4.7  |
| ZNF622    | 2  | 14.4 | 5.2  | 9.2  | -4.0  |
| SNX33     | 0  | 15.0 | 5.6  | 9.4  | -3.8  |
| NABP1     | 3  | 18.5 | 6.2  | 12.3 | -6.1  |
| CHD2      | 1  | 47.3 | 43.8 | 3.5  | 40.3  |
| CCDC106   | 0  | 11.9 | 5.6  | 6.2  | -0.6  |
| CEP83     | 1  | 36.9 | 28.3 | 8.7  | 19.6  |
| NUDT4     | 0  | 10.1 | 2.8  | 7.3  | -4.5  |
| PC        | 4  | 7.9  | 2.0  | 5.9  | -3.9  |
| SLC19A1   | 3  | 8.9  | 3.0  | 5.8  | -2.8  |
| RCE1      | 0  | 14.8 | 6.1  | 8.6  | -2.5  |
| UQCRH     | 0  | 6.0  | 3.2  | 2.8  | 0.4   |
| EIF1AX    | 1  | 69.9 | 56.3 | 13.6 | 42.6  |
| PSMD1     | 1  | 43.9 | 37.6 | 6.2  | 31.4  |
| MUC13     | 4  | 16.5 | 7.2  | 9.3  | -2.0  |
| HEG1      | 3  | 12.9 | 6.9  | 6.0  | 0.9   |
| C11orf80  | 0  | 9.4  | 3.5  | 5.9  | -2.4  |
| TOMM20    | 1  | 78.6 | 66.2 | 12.4 | 53.8  |
| AGFG1     | 1  | 19.8 | 15.5 | 4.3  | 11.1  |
| STAT5B    | 0  | 6.4  | 2.8  | 3.5  | -0.7  |
| CNP       | 0  | 13.5 | 5.2  | 8.3  | -3.0  |
| JUP       | 0  | 12.3 | 5.1  | 7.2  | -2.1  |
| EIF1      | 0  | 8.8  | 3.9  | 4.9  | -0.9  |
| ENDOV     | 0  | 5.7  | 2.8  | 2.9  | -0.1  |
| RNF213    | 3  | 11.3 | 3.2  | 8.1  | -5.0  |
| PLK3      | 2  | 16.7 | 6.0  | 10.7 | -4.7  |
| NET1      | 1  | 8.5  | 4.8  | 3.7  | 1.1   |
| DPY19L1   | 1  | 14.3 | 9.6  | 4.7  | 5.0   |
| ZNF791    | 0  | 5.7  | 1.7  | 4.0  | -2.3  |
| PHC3      | 1  | 16.3 | 12.4 | 3.9  | 8.5   |
| CBX2      | 0  | 13.7 | 4.9  | 8.8  | -3.9  |
| SPTBN2    | 0  | 9.4  | 4.1  | 5.3  | -1.1  |
| GOLIM4    | 1  | 18.1 | 14.0 | 4.1  | 9.9   |
| RBM4B     | 0  | 10.1 | 5.7  | 4.4  | 1.3   |
| USMG5     | 0  | 8.9  | 3.1  | 5.7  | -2.6  |

|          |    |      |      |      |       |
|----------|----|------|------|------|-------|
| 3-Mar    | 0  | 5.7  | 2.5  | 3.1  | -0.6  |
| RBM4     | 0  | 9.9  | 5.1  | 4.7  | 0.4   |
| XXYLT1   | 11 | 13.4 | 1.0  | 12.4 | -11.4 |
| UBXN2A   | 0  | 7.4  | 2.3  | 5.1  | -2.7  |
| CCS      | 0  | 12.2 | 7.0  | 5.2  | 1.8   |
| FBX045   | 1  | 11.9 | 5.9  | 6.0  | -0.1  |
| GNG5     | 0  | 8.6  | 3.3  | 5.3  | -2.0  |
| SLC25A30 | 1  | 9.2  | 5.7  | 3.5  | 2.3   |
| CTSF     | 0  | 10.4 | 5.5  | 4.9  | 0.6   |
| MSRB3    | 0  | 10.0 | 2.7  | 7.3  | -4.6  |
| LEMD3    | 1  | 14.5 | 7.9  | 6.6  | 1.3   |
| C16orf91 | 12 | 26.7 | 6.4  | 20.3 | -13.9 |
| FAM174A  | 0  | 11.5 | 4.9  | 6.6  | -1.7  |
| ZDHHC24  | 2  | 29.1 | 13.7 | 15.5 | -1.8  |
| TRMT10C  | 1  | 44.0 | 39.1 | 4.9  | 34.3  |
| CTU2     | 2  | 24.7 | 10.9 | 13.8 | -2.8  |
| MGA      | 1  | 27.9 | 23.0 | 4.9  | 18.1  |
| PIGG     | 0  | 8.0  | 3.9  | 4.0  | -0.1  |
| PRPF8    | 0  | 12.2 | 4.6  | 7.6  | -3.0  |
| ADCY6    | 0  | 9.2  | 3.9  | 5.3  | -1.5  |
| PITPNA   | 0  | 8.2  | 3.2  | 5.0  | -1.8  |
| DDX23    | 0  | 11.1 | 4.3  | 6.8  | -2.5  |
| ZNHIT2   | 2  | 54.3 | 31.6 | 22.7 | 8.9   |
| ZBTB4    | 0  | 13.6 | 6.4  | 7.2  | -0.9  |
| ZHX3     | 0  | 9.9  | 5.0  | 4.9  | 0.1   |
| PHLDA3   | 3  | 8.1  | 2.4  | 5.7  | -3.2  |
| EXO1     | 7  | 25.0 | 5.3  | 19.7 | -14.3 |
| RALGAPA1 | 1  | 14.3 | 11.2 | 3.1  | 8.1   |
| ATP2A2   | 0  | 12.8 | 4.3  | 8.5  | -4.2  |
| ZWILCH   | 7  | 78.2 | 9.5  | 68.7 | -59.1 |
| RPL4     | 1  | 11.2 | 7.0  | 4.1  | 2.9   |
| SNAPC5   | 1  | 11.1 | 6.1  | 5.1  | 1.0   |
| C12orf76 | 0  | 9.6  | 5.0  | 4.6  | 0.4   |
| BBS1     | 0  | 12.2 | 6.6  | 5.6  | 1.0   |
| DENND4A  | 1  | 14.5 | 8.9  | 5.6  | 3.3   |
| PELI3    | 0  | 12.6 | 5.9  | 6.7  | -0.8  |
| MRPL11   | 5  | 18.2 | 3.6  | 14.6 | -11.0 |
| GOLT1A   | 4  | 29.7 | 12.3 | 17.5 | -5.2  |
| AKIRIN1  | 0  | 10.9 | 3.8  | 7.0  | -3.2  |
| MSL2     | 1  | 11.5 | 7.2  | 4.3  | 3.0   |
| ANGEL2   | 1  | 13.3 | 9.5  | 3.8  | 5.7   |
| IQCK     | 0  | 6.5  | 2.7  | 3.8  | -1.1  |
| ZNF266   | 0  | 5.7  | 2.0  | 3.7  | -1.7  |
| SLC29A2  | 0  | 12.7 | 4.8  | 7.9  | -3.1  |
| B4GAT1   | 0  | 15.3 | 6.5  | 8.8  | -2.2  |
| TMEM167A | 1  | 62.8 | 55.0 | 7.9  | 47.1  |
| SH3PXD2B | 0  | 6.8  | 3.8  | 3.1  | 0.7   |
| KIAA1551 | 1  | 19.4 | 13.4 | 6.0  | 7.3   |
| LARP7    | 1  | 47.0 | 42.6 | 4.5  | 38.1  |
| NR1D2    | 1  | 17.5 | 12.9 | 4.6  | 8.3   |
| BRMS1    | 0  | 14.9 | 6.8  | 8.1  | -1.3  |
| RPL15    | 2  | 16.0 | 5.0  | 11.0 | -6.0  |
| HRAS     | 0  | 11.8 | 4.7  | 7.1  | -2.3  |
| SRP72    | 1  | 82.7 | 77.7 | 5.0  | 72.7  |

|          |    |      |      |      |       |
|----------|----|------|------|------|-------|
| RIN1     | 3  | 18.0 | 5.2  | 12.8 | -7.6  |
| THAP6    | 1  | 17.8 | 13.6 | 4.2  | 9.4   |
| PDZK1    | 4  | 19.4 | 11.7 | 7.8  | 3.9   |
| DENND6A  | 1  | 11.5 | 7.1  | 4.4  | 2.6   |
| PDE12    | 0  | 10.8 | 4.9  | 5.9  | -1.0  |
| GLMN     | 1  | 36.0 | 26.7 | 9.2  | 17.5  |
| YIF1A    | 0  | 8.7  | 4.3  | 4.4  | 0.0   |
| NDUFA11  | 8  | 22.0 | 8.9  | 13.1 | -4.2  |
| RSRC1    | 1  | 28.5 | 25.6 | 2.9  | 22.6  |
| RAB1B    | 0  | 15.3 | 7.8  | 7.5  | 0.4   |
| PTDSS2   | 2  | 11.7 | 3.5  | 8.2  | -4.8  |
| C19orf70 | 8  | 16.0 | 4.2  | 11.8 | -7.5  |
| SEZ6L2   | 11 | 10.6 | 1.4  | 9.2  | -7.8  |
| ASPHD1   | 11 | 14.8 | 1.3  | 13.5 | -12.2 |
| KCTD13   | 11 | 16.0 | 2.7  | 13.3 | -10.5 |
| DHX36    | 1  | 94.2 | 85.0 | 9.2  | 75.8  |
| FBXW8    | 0  | 10.9 | 4.7  | 6.3  | -1.6  |
| KLC2     | 0  | 9.3  | 4.4  | 4.9  | -0.5  |
| CTBP2    | 0  | 6.1  | 2.2  | 3.9  | -1.8  |
| ZDHHC14  | 2  | 15.6 | 4.7  | 11.0 | -6.3  |
| ATR      | 1  | 30.3 | 26.0 | 4.3  | 21.7  |
| UBE2C    | 5  | 25.7 | 16.1 | 9.6  | 6.5   |
| GK5      | 1  | 13.2 | 9.5  | 3.7  | 5.8   |
| MRPS22   | 1  | 24.5 | 19.8 | 4.8  | 15.0  |
| PACS1    | 3  | 11.6 | 4.1  | 7.5  | -3.4  |
| MARCKSL1 | 0  | 10.9 | 4.2  | 6.7  | -2.5  |
| SH3BP5L  | 8  | 15.3 | 2.5  | 12.8 | -10.3 |
| PSMD2    | 3  | 9.7  | 3.6  | 6.1  | -2.6  |
| FAM131A  | 2  | 18.3 | 7.3  | 11.0 | -3.7  |
| CSRP2    | 0  | 10.4 | 3.4  | 7.0  | -3.6  |
| PARL     | 0  | 13.0 | 5.3  | 7.7  | -2.4  |
| DDIT3    | 0  | 6.5  | 3.0  | 3.6  | -0.6  |
| PCCA     | 1  | 8.5  | 5.2  | 3.2  | 2.0   |
| DCTN2    | 0  | 7.6  | 3.0  | 4.6  | -1.6  |
| ZNF408   | 2  | 43.5 | 21.7 | 21.8 | -0.1  |
| CTDSP2   | 0  | 10.7 | 5.9  | 4.9  | 1.0   |
| CKAP5    | 1  | 97.3 | 84.4 | 12.9 | 71.5  |
| ARHGAP1  | 0  | 17.5 | 6.5  | 11.0 | -4.5  |
| MED16    | 8  | 13.1 | 3.9  | 9.2  | -5.3  |
| ATG13    | 0  | 7.5  | 3.3  | 4.2  | -0.8  |
| TP53I11  | 0  | 6.6  | 3.1  | 3.5  | -0.4  |
| APITD1   | 0  | 7.4  | 3.0  | 4.4  | -1.4  |
| DOLK     | 10 | 29.2 | 5.9  | 23.3 | -17.4 |
| CCNE2    | 7  | 13.4 | 1.7  | 11.7 | -10.0 |
| PHYKPL   | 0  | 10.3 | 3.8  | 6.6  | -2.8  |
| LSM1     | 1  | 11.4 | 7.6  | 3.8  | 3.8   |
| BANF1    | 5  | 11.1 | 2.9  | 8.1  | -5.2  |
| TMEM9B   | 1  | 6.2  | 3.0  | 3.2  | -0.2  |
| PTPN2    | 1  | 30.7 | 26.1 | 4.6  | 21.4  |
| EIF1AD   | 0  | 10.5 | 4.6  | 5.9  | -1.3  |
| SMAD2    | 0  | 13.0 | 2.6  | 10.3 | -7.7  |
| EIF3F    | 8  | 13.5 | 1.7  | 11.8 | -10.1 |
| CLTB     | 0  | 12.1 | 4.1  | 8.0  | -3.9  |
| CCDC14   | 1  | 54.8 | 49.4 | 5.3  | 44.1  |

|           |    |      |      |      |       |
|-----------|----|------|------|------|-------|
| SART1     | 0  | 9.0  | 3.8  | 5.1  | -1.3  |
| PPP2R2D   | 0  | 12.4 | 6.0  | 6.4  | -0.4  |
| MCTP1     | 0  | 6.6  | 2.1  | 4.5  | -2.5  |
| POLD4     | 3  | 17.3 | 6.6  | 10.6 | -4.0  |
| CLCF1     | 3  | 11.7 | 5.1  | 6.6  | -1.5  |
| DRAP1     | 3  | 18.0 | 9.4  | 8.5  | 0.9   |
| C11orf68  | 3  | 19.1 | 7.6  | 11.5 | -3.9  |
| PAAF1     | 2  | 12.0 | 4.4  | 7.6  | -3.2  |
| MRPL48    | 1  | 14.5 | 7.4  | 7.1  | 0.3   |
| RAB6A     | 1  | 22.1 | 18.9 | 3.2  | 15.7  |
| FOSL1     | 3  | 29.0 | 19.1 | 9.9  | 9.1   |
| SUGCT     | 0  | 7.5  | 3.4  | 4.1  | -0.8  |
| CCDC85B   | 2  | 20.9 | 7.3  | 13.6 | -6.3  |
| TMEM70    | 0  | 11.4 | 3.2  | 8.2  | -5.0  |
| RPS6KB2   | 0  | 12.3 | 6.2  | 6.1  | 0.1   |
| RMI2      | 0  | 8.9  | 3.2  | 5.7  | -2.5  |
| TOM1L2    | 3  | 14.4 | 4.5  | 9.9  | -5.4  |
| LINC00116 | 2  | 11.6 | 3.5  | 8.1  | -4.6  |
| B3GNTL1   | 0  | 8.9  | 3.3  | 5.5  | -2.2  |
| MLXIP     | 0  | 9.6  | 4.7  | 4.9  | -0.2  |
| NR2F1     | 0  | 5.3  | 2.6  | 2.8  | -0.2  |
| AURKAIP1  | 2  | 20.5 | 8.2  | 12.3 | -4.0  |
| TOMM5     | 0  | 11.6 | 4.0  | 7.6  | -3.6  |
| SLC35E3   | 6  | 14.5 | 3.1  | 11.4 | -8.3  |
| RUVBL1    | 0  | 12.4 | 4.9  | 7.5  | -2.7  |
| SFN       | 0  | 10.6 | 3.8  | 6.8  | -3.1  |
| MSRA      | 2  | 16.1 | 5.6  | 10.5 | -4.9  |
| CTDNEP1   | 0  | 8.1  | 3.4  | 4.7  | -1.3  |
| ETV4      | 4  | 14.7 | 5.2  | 9.5  | -4.3  |
| SWI5      | 10 | 9.6  | 1.1  | 8.5  | -7.4  |
| BAIAP2    | 0  | 6.2  | 2.3  | 3.9  | -1.6  |
| PLEKHF2   | 1  | 8.0  | 4.3  | 3.8  | 0.5   |
| A2M       | 4  | 12.0 | 4.2  | 7.7  | -3.5  |
| ARL4D     | 0  | 7.4  | 2.9  | 4.5  | -1.6  |
| UBE20     | 0  | 9.4  | 4.8  | 4.7  | 0.1   |
| ORAI3     | 11 | 25.3 | 3.0  | 22.3 | -19.3 |
| UNC119B   | 0  | 17.4 | 6.6  | 10.8 | -4.2  |
| TUBB6     | 0  | 7.3  | 3.2  | 4.1  | -0.9  |
| LYSMD3    | 1  | 24.8 | 21.2 | 3.6  | 17.7  |
| B3GALT6   | 2  | 33.6 | 17.3 | 16.2 | 1.1   |
| NUPR1     | 0  | 7.6  | 3.8  | 3.8  | 0.0   |
| TPRN      | 2  | 14.4 | 4.6  | 9.7  | -5.1  |
| SLC35A4   | 0  | 10.1 | 4.5  | 5.6  | -1.1  |
| IP6K1     | 0  | 10.7 | 6.1  | 4.6  | 1.4   |
| SSNA1     | 10 | 23.6 | 7.8  | 15.8 | -8.0  |
| CSTF3     | 1  | 23.8 | 17.6 | 6.2  | 11.4  |
| YES1      | 1  | 29.2 | 26.4 | 2.8  | 23.6  |
| CHMP6     | 0  | 10.2 | 3.8  | 6.3  | -2.5  |
| DLEU1     | 0  | 9.6  | 3.3  | 6.3  | -3.0  |
| TMEM39A   | 0  | 9.6  | 5.1  | 4.6  | 0.5   |
| TCP11L1   | 0  | 6.9  | 2.7  | 4.2  | -1.5  |
| GPX2      | 4  | 24.3 | 13.2 | 11.0 | 2.2   |
| CCDC57    | 0  | 7.0  | 3.4  | 3.6  | -0.2  |
| SPHK1     | 0  | 7.6  | 2.9  | 4.7  | -1.8  |

|          |    |      |      |      |       |
|----------|----|------|------|------|-------|
| BNIP3    | 0  | 6.2  | 2.7  | 3.5  | -0.7  |
| SMIM19   | 0  | 6.6  | 2.3  | 4.3  | -2.0  |
| RTTN     | 0  | 7.7  | 3.3  | 4.5  | -1.2  |
| ANAPC2   | 10 | 23.8 | 6.0  | 17.8 | -11.7 |
| ZBTB80S  | 1  | 48.7 | 41.4 | 7.4  | 34.0  |
| COX8A    | 2  | 18.8 | 7.2  | 11.6 | -4.3  |
| ZSCAN2   | 4  | 18.9 | 4.6  | 14.3 | -9.7  |
| CDC26    | 0  | 10.1 | 3.2  | 6.9  | -3.7  |
| CRLF3    | 7  | 16.4 | 2.0  | 14.4 | -12.4 |
| RNPEP    | 0  | 8.9  | 3.6  | 5.3  | -1.7  |
| EID2     | 0  | 10.1 | 4.0  | 6.0  | -2.0  |
| KCMF1    | 0  | 6.9  | 1.9  | 5.0  | -3.2  |
| SPRYD4   | 2  | 23.9 | 11.1 | 12.7 | -1.6  |
| CLK2     | 9  | 8.2  | 1.3  | 6.9  | -5.6  |
| LPCAT4   | 0  | 8.3  | 3.6  | 4.7  | -1.1  |
| WDR25    | 0  | 10.0 | 4.5  | 5.5  | -1.1  |
| SGF29    | 11 | 18.9 | 1.5  | 17.3 | -15.8 |
| PLA2G16  | 0  | 6.9  | 3.0  | 4.0  | -1.0  |
| PHLDB3   | 2  | 13.3 | 4.4  | 8.9  | -4.5  |
| B3GNT5   | 0  | 7.1  | 2.9  | 4.2  | -1.3  |
| LMNB2    | 5  | 18.6 | 6.1  | 12.5 | -6.5  |
| RMDN1    | 1  | 19.0 | 15.9 | 3.1  | 12.8  |
| MEX3C    | 1  | 10.7 | 6.7  | 4.0  | 2.7   |
| MYO1D    | 0  | 7.2  | 3.1  | 4.0  | -0.9  |
| ACSF3    | 0  | 10.9 | 5.2  | 5.7  | -0.5  |
| BOK      | 0  | 13.2 | 5.2  | 8.0  | -2.7  |
| C8orf59  | 1  | 22.8 | 19.5 | 3.3  | 16.2  |
| RUFY1    | 0  | 6.5  | 2.5  | 4.0  | -1.5  |
| BASP1    | 0  | 8.5  | 2.9  | 5.6  | -2.7  |
| VSIG10   | 4  | 13.3 | 3.8  | 9.5  | -5.8  |
| METRNL   | 0  | 9.5  | 3.8  | 5.7  | -1.9  |
| FAM91A1  | 1  | 26.6 | 23.4 | 3.3  | 20.1  |
| WSB2     | 0  | 9.8  | 4.3  | 5.4  | -1.1  |
| TYMS     | 5  | 22.0 | 13.3 | 8.8  | 4.5   |
| PXMP2    | 2  | 15.6 | 5.0  | 10.6 | -5.5  |
| PNMA1    | 0  | 8.8  | 4.2  | 4.6  | -0.4  |
| C8orf4   | 0  | 7.0  | 2.2  | 4.9  | -2.7  |
| ANKLE2   | 1  | 14.8 | 9.6  | 5.3  | 4.3   |
| THAP4    | 0  | 13.6 | 5.7  | 7.9  | -2.2  |
| NFATC2IP | 11 | 10.0 | 1.3  | 8.7  | -7.5  |
| FAM89B   | 2  | 30.1 | 11.8 | 18.3 | -6.4  |
| SHMT1    | 0  | 12.8 | 3.7  | 9.1  | -5.4  |
| DPP7     | 0  | 11.5 | 4.3  | 7.2  | -2.9  |
| SEC24C   | 0  | 10.9 | 5.8  | 5.1  | 0.7   |
| SMCR8    | 0  | 10.4 | 4.3  | 6.0  | -1.7  |
| MTHFR    | 2  | 19.1 | 6.6  | 12.6 | -6.0  |
| DEAF1    | 0  | 8.4  | 3.6  | 4.8  | -1.2  |
| MTX3     | 1  | 32.2 | 28.4 | 3.9  | 24.5  |
| TMEM80   | 0  | 12.1 | 5.2  | 6.8  | -1.6  |
| FBXO46   | 2  | 13.6 | 4.9  | 8.7  | -3.8  |
| ZDHHC13  | 1  | 9.7  | 6.3  | 3.4  | 2.9   |
| SLC38A9  | 1  | 10.3 | 7.4  | 3.0  | 4.4   |
| WDR73    | 0  | 11.2 | 4.3  | 6.8  | -2.5  |
| POLE     | 5  | 14.8 | 3.8  | 11.0 | -7.2  |

|          |    |      |      |      |       |
|----------|----|------|------|------|-------|
| RHOG     | 3  | 16.8 | 5.5  | 11.3 | -5.8  |
| EPS8L2   | 0  | 9.9  | 3.8  | 6.1  | -2.3  |
| ANO6     | 1  | 18.7 | 15.1 | 3.5  | 11.6  |
| FAM210A  | 0  | 6.8  | 2.4  | 4.3  | -1.9  |
| TALDO1   | 0  | 8.7  | 3.8  | 4.9  | -1.1  |
| ULK1     | 0  | 8.2  | 4.3  | 3.9  | 0.4   |
| RPS6KA3  | 1  | 31.8 | 27.5 | 4.3  | 23.2  |
| PUS1     | 2  | 26.4 | 8.9  | 17.6 | -8.7  |
| CHD9     | 1  | 17.0 | 13.4 | 3.6  | 9.9   |
| PDDC1    | 0  | 10.9 | 4.2  | 6.7  | -2.5  |
| MAN1B1   | 10 | 15.3 | 2.4  | 12.9 | -10.5 |
| TOP3A    | 0  | 9.7  | 4.6  | 5.1  | -0.5  |
| CASKIN2  | 2  | 18.5 | 5.8  | 12.7 | -6.9  |
| ZBTB38   | 1  | 23.7 | 17.6 | 6.1  | 11.6  |
| CCDC71   | 2  | 27.8 | 13.5 | 14.3 | -0.9  |
| TIMM22   | 2  | 29.2 | 12.8 | 16.3 | -3.5  |
| PPFIA3   | 0  | 10.6 | 4.6  | 6.0  | -1.4  |
| MAGEF1   | 0  | 13.3 | 5.7  | 7.5  | -1.8  |
| PAWR     | 1  | 21.9 | 16.2 | 5.7  | 10.4  |
| TGIF1    | 0  | 4.8  | 2.0  | 2.8  | -0.8  |
| MIEF2    | 2  | 18.2 | 6.4  | 11.7 | -5.3  |
| NR2C2    | 0  | 13.4 | 4.7  | 8.7  | -3.9  |
| PTRF     | 3  | 19.5 | 12.8 | 6.7  | 6.1   |
| ARIH2    | 0  | 12.7 | 6.0  | 6.7  | -0.7  |
| ZBTB33   | 1  | 20.2 | 17.3 | 2.8  | 14.5  |
| SLC25A22 | 2  | 15.6 | 6.0  | 9.6  | -3.7  |
| RABEP2   | 2  | 21.4 | 7.8  | 13.6 | -5.9  |
| ATOX1    | 0  | 8.1  | 3.7  | 4.4  | -0.7  |
| TBL1XR1  | 1  | 69.8 | 64.3 | 5.5  | 58.8  |
| C18orf32 | 0  | 11.0 | 4.8  | 6.2  | -1.5  |
| PIDD1    | 2  | 19.1 | 7.2  | 11.9 | -4.6  |
| RPLP2    | 0  | 7.0  | 2.3  | 4.6  | -2.3  |
| JUN      | 3  | 14.7 | 7.8  | 6.9  | 0.9   |
| CSTF2T   | 0  | 6.5  | 3.0  | 3.4  | -0.4  |
| GBA      | 9  | 9.9  | 1.1  | 8.8  | -7.7  |
| ACAD9    | 0  | 10.8 | 4.0  | 6.7  | -2.7  |
| IL17RA   | 2  | 15.9 | 4.7  | 11.2 | -6.5  |
| PNPLA2   | 0  | 13.1 | 4.9  | 8.1  | -3.2  |
| AGTRAP   | 0  | 14.4 | 6.2  | 8.2  | -2.0  |
| THAP5    | 1  | 28.2 | 25.4 | 2.9  | 22.5  |
| CRACR2B  | 2  | 16.2 | 6.5  | 9.7  | -3.2  |
| CD151    | 3  | 17.9 | 9.0  | 8.9  | 0.0   |
| POLR2L   | 0  | 9.2  | 3.4  | 5.7  | -2.3  |
| FAM20C   | 0  | 7.2  | 2.8  | 4.3  | -1.5  |
| PVRL3    | 1  | 17.4 | 13.2 | 4.2  | 9.0   |
| TMEM94   | 0  | 7.4  | 3.8  | 3.5  | 0.3   |
| FLII     | 6  | 12.5 | 3.5  | 9.1  | -5.6  |
| SOX12    | 0  | 14.0 | 6.4  | 7.6  | -1.3  |
| HNRNPA0  | 8  | 18.7 | 2.3  | 16.4 | -14.2 |
| CHID1    | 0  | 10.2 | 4.6  | 5.6  | -1.0  |
| SVBP     | 6  | 12.9 | 2.8  | 10.1 | -7.3  |
| AP3S1    | 1  | 71.0 | 59.0 | 12.0 | 47.0  |
| GRB2     | 0  | 12.7 | 5.5  | 7.2  | -1.7  |
| UBE2N    | 1  | 42.6 | 30.6 | 11.9 | 18.7  |

|          |    |      |      |      |       |
|----------|----|------|------|------|-------|
| ARL6IP6  | 6  | 24.0 | 4.0  | 20.0 | -16.0 |
| BET1L    | 0  | 10.9 | 4.5  | 6.4  | -1.9  |
| RPS27    | 9  | 7.5  | 1.4  | 6.1  | -4.8  |
| RIC8A    | 3  | 14.1 | 4.7  | 9.4  | -4.7  |
| IMP3     | 4  | 24.6 | 6.5  | 18.1 | -11.6 |
| ASB8     | 1  | 9.7  | 4.5  | 5.1  | -0.6  |
| DMAP1    | 0  | 9.6  | 4.7  | 4.9  | -0.3  |
| IMPDH2   | 0  | 11.6 | 5.2  | 6.4  | -1.2  |
| NDUFAF3  | 0  | 9.4  | 4.4  | 5.0  | -0.7  |
| C2orf69  | 1  | 27.4 | 21.6 | 5.8  | 15.9  |
| STAP2    | 4  | 17.0 | 4.4  | 12.6 | -8.1  |
| BOLA1    | 9  | 26.7 | 3.6  | 23.1 | -19.5 |
| PDE4DIP  | 0  | 7.1  | 2.7  | 4.4  | -1.7  |
| DDX10    | 1  | 14.3 | 8.6  | 5.6  | 3.0   |
| NDUFV2   | 0  | 7.9  | 3.1  | 4.8  | -1.8  |
| DALRD3   | 0  | 9.0  | 4.4  | 4.6  | -0.1  |
| LCORL    | 1  | 8.8  | 5.4  | 3.4  | 2.0   |
| SH2B1    | 11 | 12.3 | 1.6  | 10.7 | -9.1  |
| KDELC2   | 1  | 11.3 | 6.7  | 4.5  | 2.2   |
| PLEC     | 3  | 19.7 | 10.5 | 9.2  | 1.3   |
| GALNT11  | 0  | 6.1  | 2.7  | 3.4  | -0.6  |
| WDR6     | 0  | 8.7  | 4.7  | 4.0  | 0.6   |
| GEN1     | 1  | 21.5 | 16.9 | 4.7  | 12.2  |
| TMEM11   | 2  | 17.9 | 7.0  | 10.8 | -3.8  |
| ZFAND2A  | 0  | 9.6  | 3.3  | 6.4  | -3.1  |
| FAM220A  | 0  | 6.9  | 1.8  | 5.1  | -3.3  |
| DNAJC22  | 4  | 22.7 | 13.9 | 8.8  | 5.0   |
| NT5DC1   | 1  | 9.3  | 5.4  | 3.9  | 1.5   |
| GLDC     | 4  | 20.7 | 8.2  | 12.6 | -4.4  |
| COX14    | 2  | 16.9 | 5.9  | 10.9 | -5.0  |
| P4HTM    | 3  | 11.2 | 3.9  | 7.4  | -3.5  |
| CTXN1    | 2  | 23.3 | 8.4  | 14.8 | -6.4  |
| SLC25A20 | 4  | 24.5 | 10.0 | 14.5 | -4.4  |
| CTNNBIP1 | 0  | 10.2 | 5.5  | 4.7  | 0.8   |
| GTPBP6   | 2  | 11.4 | 4.0  | 7.4  | -3.4  |
| ERN1     | 0  | 15.6 | 5.6  | 9.9  | -4.3  |
| PARP10   | 3  | 21.1 | 7.1  | 14.0 | -6.8  |
| SUZ12    | 1  | 57.4 | 48.5 | 8.9  | 39.6  |
| GRINA    | 13 | 10.2 | 1.3  | 8.9  | -7.6  |
| COX5A    | 4  | 18.5 | 6.5  | 12.0 | -5.6  |
| FAM219B  | 0  | 8.8  | 4.2  | 4.5  | -0.3  |
| ZHX2     | 4  | 13.8 | 4.7  | 9.1  | -4.4  |
| MPI      | 0  | 15.4 | 5.6  | 9.8  | -4.2  |
| OPLAH    | 2  | 22.6 | 9.0  | 13.6 | -4.6  |
| TMEM139  | 2  | 12.0 | 3.7  | 8.3  | -4.6  |
| MSC      | 0  | 8.1  | 2.7  | 5.4  | -2.7  |
| EXOSC4   | 13 | 24.1 | 3.7  | 20.4 | -16.7 |
| DPY19L3  | 1  | 21.4 | 17.9 | 3.4  | 14.5  |
| TAF7     | 1  | 7.2  | 4.2  | 3.0  | 1.2   |
| PFAS     | 0  | 14.0 | 5.8  | 8.2  | -2.4  |
| HYI      | 3  | 16.2 | 7.5  | 8.7  | -1.2  |
| C17orf62 | 0  | 7.7  | 3.8  | 3.9  | -0.1  |
| GAK      | 8  | 15.0 | 2.6  | 12.4 | -9.7  |
| ZBTB7A   | 8  | 37.8 | 5.7  | 32.1 | -26.4 |



|           |    |      |      |      |       |
|-----------|----|------|------|------|-------|
| TUFM      | 0  | 12.1 | 4.5  | 7.6  | -3.1  |
| RMI1      | 7  | 25.6 | 5.5  | 20.1 | -14.6 |
| CTC1      | 0  | 11.4 | 4.2  | 7.2  | -3.1  |
| FBXO34    | 0  | 7.4  | 3.2  | 4.1  | -0.9  |
| SEPW1     | 0  | 5.5  | 3.0  | 2.4  | 0.6   |
| EIF3K     | 0  | 8.8  | 4.0  | 4.8  | -0.7  |
| MRFAP1L1  | 1  | 17.2 | 13.6 | 3.5  | 10.1  |
| SNX18     | 0  | 7.9  | 3.5  | 4.4  | -0.9  |
| AURKB     | 5  | 23.5 | 11.6 | 12.0 | -0.4  |
| MRFAP1    | 0  | 8.5  | 3.2  | 5.2  | -2.0  |
| C3orf38   | 1  | 13.2 | 10.1 | 3.1  | 7.0   |
| TMEM107   | 0  | 12.2 | 5.4  | 6.8  | -1.5  |
| RRS1      | 0  | 12.2 | 4.1  | 8.1  | -4.1  |
| RCC2      | 0  | 10.7 | 4.7  | 6.0  | -1.3  |
| DPM3      | 0  | 14.0 | 4.6  | 9.5  | -4.9  |
| CYC1      | 13 | 20.1 | 3.7  | 16.5 | -12.8 |
| FARSA     | 8  | 24.8 | 9.2  | 15.6 | -6.4  |
| SPTY2D1   | 1  | 15.9 | 12.5 | 3.4  | 9.1   |
| SAMD4B    | 0  | 8.5  | 4.8  | 3.7  | 1.1   |
| EDC3      | 0  | 9.5  | 3.2  | 6.3  | -3.1  |
| TCAIM     | 1  | 11.2 | 6.0  | 5.2  | 0.8   |
| FUCA1     | 0  | 7.7  | 3.3  | 4.4  | -1.1  |
| ZNF664    | 1  | 27.6 | 23.6 | 4.0  | 19.7  |
| CALR      | 0  | 10.3 | 4.6  | 5.7  | -1.0  |
| MAGED1    | 0  | 6.9  | 3.5  | 3.4  | 0.0   |
| LDLRAD3   | 0  | 8.1  | 3.5  | 4.6  | -1.2  |
| RAD23A    | 8  | 14.3 | 4.7  | 9.6  | -4.8  |
| GADD45GIP | 8  | 29.2 | 10.9 | 18.3 | -7.4  |
| PTPN11    | 1  | 59.4 | 54.8 | 4.5  | 50.3  |
| CLK3      | 2  | 12.9 | 4.0  | 8.9  | -4.9  |
| GATA2     | 2  | 17.1 | 6.8  | 10.3 | -3.5  |
| ARID3B    | 0  | 15.4 | 6.7  | 8.7  | -2.0  |
| PACS2     | 0  | 9.6  | 5.1  | 4.5  | 0.7   |
| ELMOD2    | 1  | 14.5 | 11.2 | 3.3  | 7.9   |
| VWA1      | 4  | 12.3 | 3.2  | 9.2  | -6.0  |
| GEMIN4    | 2  | 19.8 | 6.5  | 13.4 | -6.9  |
| FJX1      | 0  | 15.0 | 5.9  | 9.1  | -3.2  |
| ZBTB18    | 3  | 15.8 | 8.2  | 7.6  | 0.6   |
| SHARPIN   | 13 | 12.8 | 2.8  | 9.9  | -7.1  |
| GCC1      | 0  | 8.2  | 3.8  | 4.4  | -0.5  |
| CDC42EP4  | 2  | 17.9 | 4.4  | 13.5 | -9.1  |
| MAF1      | 13 | 12.2 | 3.7  | 8.5  | -4.9  |
| PCED1B    | 0  | 7.2  | 2.4  | 4.8  | -2.3  |
| APOBEC3B  | 0  | 8.3  | 3.0  | 5.3  | -2.3  |
| MYADM     | 0  | 6.5  | 3.0  | 3.5  | -0.5  |
| MROH1     | 13 | 23.2 | 2.5  | 20.7 | -18.2 |
| SERTAD2   | 7  | 8.9  | 1.0  | 7.9  | -6.9  |
| CITED4    | 2  | 22.7 | 9.0  | 13.7 | -4.7  |
| PDXDC1    | 0  | 11.8 | 3.2  | 8.6  | -5.4  |
| R3HDM2    | 1  | 11.1 | 6.3  | 4.8  | 1.4   |
| SEPHS2    | 4  | 20.5 | 8.3  | 12.1 | -3.8  |
| C14orf119 | 6  | 10.4 | 2.1  | 8.3  | -6.1  |
| FIZ1      | 2  | 30.3 | 12.3 | 18.1 | -5.8  |
| PUF60     | 13 | 15.2 | 4.2  | 11.0 | -6.8  |

|           |    |      |      |      |       |
|-----------|----|------|------|------|-------|
| DCTPP1    | 5  | 16.0 | 3.1  | 12.9 | -9.8  |
| PSTK      | 0  | 8.2  | 3.9  | 4.3  | -0.4  |
| SOCS4     | 1  | 24.9 | 21.6 | 3.3  | 18.3  |
| ZADH2     | 0  | 7.4  | 3.5  | 3.9  | -0.5  |
| ZNF48     | 11 | 24.3 | 2.7  | 21.6 | -18.9 |
| TMEM86B   | 4  | 14.0 | 3.6  | 10.3 | -6.7  |
| TRNAU1AP  | 0  | 10.5 | 5.1  | 5.4  | -0.4  |
| EXOC3     | 0  | 9.7  | 4.3  | 5.3  | -1.0  |
| MED14     | 1  | 17.3 | 12.4 | 4.9  | 7.5   |
| FAHD1     | 12 | 7.8  | 1.2  | 6.6  | -5.3  |
| RCC1      | 0  | 15.1 | 6.0  | 9.0  | -3.0  |
| F2        | 4  | 25.1 | 15.3 | 9.8  | 5.5   |
| PRKRA     | 1  | 13.5 | 9.2  | 4.3  | 4.8   |
| FGD6      | 1  | 8.5  | 5.6  | 2.9  | 2.8   |
| OAZ2      | 0  | 6.8  | 3.8  | 3.0  | 0.8   |
| CCDC43    | 1  | 21.6 | 16.7 | 4.9  | 11.8  |
| FZD2      | 3  | 16.4 | 7.9  | 8.6  | -0.7  |
| ZNF609    | 0  | 11.9 | 5.9  | 6.0  | -0.1  |
| PAK2      | 1  | 16.3 | 10.9 | 5.4  | 5.5   |
| CCDC66    | 1  | 24.1 | 20.2 | 3.9  | 16.3  |
| MCFD2     | 1  | 19.3 | 16.6 | 2.7  | 13.9  |
| HMHA1     | 2  | 20.1 | 7.8  | 12.3 | -4.6  |
| FAM73A    | 1  | 20.6 | 17.9 | 2.8  | 15.1  |
| NRIP1     | 1  | 10.3 | 8.0  | 2.3  | 5.7   |
| HIST1H2AC | 0  | 7.2  | 4.1  | 3.1  | 1.0   |
| PCGF5     | 7  | 10.9 | 1.0  | 9.8  | -8.8  |
| YOD1      | 1  | 19.8 | 16.1 | 3.7  | 12.5  |
| TMEM64    | 1  | 12.3 | 8.4  | 4.0  | 4.4   |
| GPR157    | 0  | 7.0  | 3.3  | 3.6  | -0.3  |
| SLC36A4   | 0  | 5.7  | 2.1  | 3.6  | -1.5  |
| ZDHHC20   | 1  | 40.5 | 36.1 | 4.4  | 31.7  |
| ARSJ      | 3  | 10.3 | 4.7  | 5.6  | -0.9  |
| PPA1      | 5  | 17.7 | 3.4  | 14.3 | -10.9 |
| PSMG4     | 2  | 18.0 | 6.5  | 11.5 | -5.1  |
| SSR4      | 0  | 12.3 | 5.7  | 6.6  | -0.9  |
| CUEDC1    | 3  | 10.0 | 4.5  | 5.5  | -1.0  |
| SCRIB     | 13 | 16.1 | 3.4  | 12.6 | -9.2  |
| KCTD2     | 2  | 16.6 | 6.0  | 10.6 | -4.5  |
| D2HGDH    | 0  | 7.6  | 3.2  | 4.4  | -1.2  |
| CMTR2     | 1  | 12.8 | 9.5  | 3.3  | 6.2   |
| FAM83H    | 4  | 31.8 | 8.5  | 23.3 | -14.8 |
| ST20      | 0  | 8.4  | 3.0  | 5.4  | -2.4  |
| PITPNB    | 1  | 15.6 | 9.9  | 5.6  | 4.3   |
| TCEAL8    | 0  | 5.9  | 2.4  | 3.5  | -1.1  |
| LRRC57    | 0  | 6.5  | 2.3  | 4.2  | -2.0  |
| MRPL14    | 2  | 12.9 | 4.2  | 8.7  | -4.4  |
| NQO1      | 1  | 8.7  | 5.4  | 3.3  | 2.1   |
| AEN       | 2  | 17.2 | 6.0  | 11.2 | -5.2  |
| FKRP      | 0  | 15.5 | 7.4  | 8.0  | -0.6  |
| TRAPPC5   | 8  | 19.0 | 6.0  | 13.1 | -7.1  |
| RPH3AL    | 0  | 12.8 | 4.6  | 8.2  | -3.6  |
| METTL23   | 0  | 9.7  | 4.3  | 5.5  | -1.2  |
| SLC26A11  | 0  | 11.0 | 4.1  | 6.9  | -2.8  |
| HIGD1A    | 1  | 16.7 | 12.7 | 4.0  | 8.7   |

|         |    |      |      |      |       |
|---------|----|------|------|------|-------|
| EHMT1   | 10 | 13.5 | 2.6  | 10.9 | -8.2  |
| F2R     | 3  | 11.7 | 4.5  | 7.2  | -2.7  |
| ZNF707  | 13 | 16.7 | 2.9  | 13.8 | -11.0 |
| NPM1    | 1  | 73.3 | 65.4 | 8.0  | 57.4  |
| PJA1    | 0  | 9.3  | 4.7  | 4.6  | 0.1   |
| DHTKD1  | 0  | 8.5  | 2.1  | 6.5  | -4.4  |
| ZNF746  | 2  | 13.0 | 4.8  | 8.2  | -3.3  |
| POLR2A  | 0  | 10.4 | 5.4  | 5.0  | 0.4   |
| FRAT2   | 4  | 28.8 | 11.0 | 17.9 | -6.9  |
| ZNF322  | 1  | 16.4 | 13.3 | 3.0  | 10.3  |
| LRRC75A | 0  | 10.7 | 4.8  | 6.0  | -1.2  |
| OGFOD3  | 0  | 11.6 | 4.8  | 6.8  | -2.0  |
| TMEM45A | 0  | 6.2  | 2.2  | 3.9  | -1.7  |
| RAP2B   | 0  | 9.5  | 3.8  | 5.7  | -1.9  |
| ZBTB2   | 1  | 9.9  | 6.6  | 3.3  | 3.4   |
| ACBD4   | 2  | 20.7 | 7.9  | 12.9 | -5.0  |
| SGSH    | 0  | 9.3  | 3.6  | 5.6  | -2.0  |
| SETD2   | 1  | 41.8 | 38.7 | 3.2  | 35.5  |
| MEX3D   | 8  | 26.9 | 6.6  | 20.2 | -13.6 |
| MRPS23  | 0  | 11.6 | 4.1  | 7.6  | -3.5  |
| ZFP41   | 13 | 14.6 | 2.2  | 12.5 | -10.3 |
| PHLDA2  | 3  | 23.4 | 6.9  | 16.5 | -9.6  |
| HKR1    | 0  | 7.5  | 3.3  | 4.2  | -0.9  |
| YIPF6   | 1  | 21.4 | 16.1 | 5.3  | 10.8  |
| C3orf58 | 1  | 8.1  | 5.0  | 3.1  | 1.9   |
| C5orf30 | 0  | 8.2  | 2.4  | 5.9  | -3.5  |
| SIAH2   | 0  | 9.6  | 3.9  | 5.7  | -1.8  |
| COPG1   | 0  | 7.9  | 4.1  | 3.8  | 0.3   |
| LSM10   | 2  | 22.2 | 9.0  | 13.3 | -4.3  |
| RELL1   | 0  | 7.1  | 3.2  | 3.9  | -0.7  |
| SLC35C1 | 2  | 19.6 | 5.7  | 13.9 | -8.2  |
| RNF41   | 0  | 11.0 | 5.5  | 5.4  | 0.1   |
| ZNF101  | 0  | 10.5 | 4.5  | 6.0  | -1.5  |
| C5orf24 | 1  | 46.0 | 40.9 | 5.1  | 35.9  |
| ADO     | 3  | 10.1 | 2.9  | 7.2  | -4.3  |
| COA4    | 2  | 20.0 | 8.3  | 11.8 | -3.5  |
| PRKAG1  | 0  | 6.7  | 2.4  | 4.3  | -1.9  |
| GINS3   | 0  | 12.1 | 4.3  | 7.8  | -3.4  |
| MRPS11  | 4  | 11.4 | 2.6  | 8.8  | -6.2  |
| SNRPE   | 1  | 72.6 | 58.9 | 13.7 | 45.2  |
| CHST15  | 3  | 10.0 | 3.6  | 6.4  | -2.9  |
| IDH2    | 4  | 7.1  | 2.1  | 5.0  | -3.0  |
| TMEM259 | 8  | 13.1 | 5.0  | 8.1  | -3.1  |
| WRB     | 0  | 8.2  | 2.4  | 5.8  | -3.5  |
| TNRC18  | 0  | 12.9 | 6.3  | 6.6  | -0.3  |
| DEXI    | 12 | 14.2 | 1.5  | 12.7 | -11.1 |
| NOP10   | 0  | 10.1 | 3.5  | 6.6  | -3.0  |
| FAM89A  | 2  | 12.2 | 3.9  | 8.3  | -4.4  |
| TDRKH   | 9  | 9.3  | 2.3  | 7.0  | -4.8  |
| IST1    | 0  | 10.2 | 5.7  | 4.5  | 1.3   |
| ERCC6L2 | 1  | 32.6 | 28.6 | 3.9  | 24.7  |
| MRPL41  | 10 | 32.6 | 5.9  | 26.7 | -20.9 |
| CREB3L2 | 0  | 6.9  | 3.2  | 3.7  | -0.5  |
| TSEN54  | 0  | 13.5 | 4.7  | 8.8  | -4.1  |

|          |    |      |      |      |       |
|----------|----|------|------|------|-------|
| UBA7     | 3  | 16.8 | 5.0  | 11.8 | -6.7  |
| MRPS16   | 0  | 13.4 | 6.2  | 7.3  | -1.1  |
| RAD51B   | 0  | 6.2  | 2.0  | 4.2  | -2.2  |
| ARL6IP4  | 0  | 9.3  | 4.0  | 5.3  | -1.3  |
| EXT1     | 3  | 17.0 | 11.0 | 6.0  | 5.0   |
| SHMT2    | 0  | 12.2 | 4.5  | 7.7  | -3.2  |
| MOB2     | 8  | 24.8 | 3.6  | 21.2 | -17.6 |
| ATP6AP2  | 1  | 30.3 | 25.0 | 5.3  | 19.6  |
| CYB5D1   | 0  | 12.3 | 5.2  | 7.1  | -1.9  |
| BACE2    | 3  | 12.8 | 6.1  | 6.8  | -0.7  |
| UBE2E2   | 1  | 9.0  | 4.4  | 4.6  | -0.2  |
| AP1S2    | 1  | 17.8 | 9.5  | 8.3  | 1.3   |
| C8orf33  | 13 | 11.7 | 2.4  | 9.4  | -7.0  |
| FBXL6    | 13 | 21.6 | 2.2  | 19.4 | -17.2 |
| C1S      | 3  | 13.1 | 4.0  | 9.0  | -5.0  |
| YBEY     | 0  | 9.6  | 3.8  | 5.9  | -2.1  |
| CLN8     | 0  | 9.1  | 3.8  | 5.3  | -1.6  |
| PLCXD1   | 4  | 9.5  | 2.7  | 6.8  | -4.1  |
| TRAPPC6B | 1  | 24.3 | 21.4 | 2.9  | 18.5  |
| NPLOC4   | 0  | 9.5  | 3.0  | 6.6  | -3.6  |
| CAPN12   | 3  | 8.2  | 2.6  | 5.7  | -3.1  |
| EXOC7    | 0  | 9.9  | 4.9  | 5.0  | 0.0   |
| KPNA2    | 5  | 31.4 | 19.6 | 11.8 | 7.7   |
| GLRX5    | 0  | 11.3 | 4.6  | 6.8  | -2.2  |
| FAM104B  | 0  | 9.5  | 3.7  | 5.7  | -2.0  |
| MXRA7    | 3  | 14.4 | 6.5  | 7.9  | -1.3  |
| LIMK2    | 4  | 15.4 | 2.8  | 12.5 | -9.7  |
| MFSD5    | 2  | 14.5 | 4.7  | 9.8  | -5.1  |
| ADI1     | 0  | 8.0  | 2.9  | 5.1  | -2.3  |
| RWDD4    | 1  | 9.0  | 5.2  | 3.8  | 1.4   |
| TRAK1    | 0  | 8.5  | 4.5  | 4.0  | 0.5   |
| PLCB1    | 1  | 13.5 | 7.9  | 5.6  | 2.2   |
| SKA2     | 7  | 46.9 | 6.4  | 40.5 | -34.1 |
| TTC3     | 1  | 55.4 | 51.9 | 3.5  | 48.4  |
| TSKU     | 0  | 10.3 | 4.6  | 5.7  | -1.1  |
| CMC4     | 2  | 17.8 | 6.0  | 11.8 | -5.9  |
| ANXA2    | 3  | 13.2 | 7.1  | 6.1  | 1.0   |
| NGRN     | 4  | 11.5 | 3.1  | 8.5  | -5.4  |
| RPS17    | 0  | 6.9  | 2.8  | 4.1  | -1.2  |
| CRIP2    | 0  | 8.3  | 3.7  | 4.6  | -0.9  |
| DDX28    | 2  | 49.0 | 28.0 | 21.1 | 6.9   |
| ACBD3    | 1  | 32.2 | 28.9 | 3.4  | 25.5  |
| C16orf72 | 1  | 9.9  | 6.8  | 3.1  | 3.6   |
| ALG12    | 0  | 10.2 | 4.6  | 5.6  | -1.0  |
| COL18A1  | 3  | 9.5  | 4.2  | 5.3  | -1.1  |
| RBM10    | 2  | 20.9 | 8.9  | 12.0 | -3.2  |
| RPL35A   | 0  | 8.8  | 3.7  | 5.1  | -1.4  |
| ZNF721   | 1  | 12.5 | 6.6  | 5.8  | 0.8   |
| C11orf54 | 1  | 11.4 | 6.5  | 4.9  | 1.6   |
| CEP63    | 1  | 27.5 | 21.1 | 6.4  | 14.6  |
| SRPRA    | 0  | 9.7  | 4.6  | 5.2  | -0.6  |
| EWSR1    | 1  | 11.0 | 6.0  | 5.0  | 0.9   |
| HMG4     | 0  | 7.9  | 2.3  | 5.6  | -3.3  |
| SPATA13  | 4  | 8.6  | 2.3  | 6.3  | -4.0  |

|          |    |      |      |      |       |
|----------|----|------|------|------|-------|
| GJC1     | 0  | 7.7  | 2.7  | 5.1  | -2.4  |
| CNOT10   | 1  | 36.2 | 29.2 | 7.0  | 22.2  |
| MTA1     | 0  | 10.2 | 4.4  | 5.8  | -1.3  |
| CADM1    | 3  | 12.2 | 3.6  | 8.6  | -5.1  |
| PYCR1    | 0  | 5.5  | 2.1  | 3.4  | -1.2  |
| NAA38    | 0  | 7.8  | 3.0  | 4.8  | -1.8  |
| AP2A2    | 6  | 9.3  | 1.9  | 7.4  | -5.4  |
| SLC25A10 | 12 | 22.0 | 1.1  | 20.9 | -19.9 |
| LYSMD4   | 4  | 14.8 | 5.3  | 9.5  | -4.2  |
| AFMID    | 4  | 20.2 | 7.3  | 12.9 | -5.6  |
| GAS6     | 3  | 16.9 | 8.8  | 8.0  | 0.8   |
| GPC6     | 0  | 6.7  | 2.9  | 3.8  | -0.9  |
| CEP57L1  | 7  | 14.9 | 2.6  | 12.3 | -9.7  |
| RABIF    | 2  | 14.1 | 4.9  | 9.3  | -4.4  |
| SMDT1    | 0  | 8.7  | 4.1  | 4.6  | -0.5  |
| RUVBL2   | 0  | 16.0 | 6.4  | 9.5  | -3.1  |
| PTTG1IP  | 3  | 12.3 | 5.1  | 7.3  | -2.2  |
| DDX41    | 6  | 17.5 | 5.5  | 12.0 | -6.5  |
| DAZAP2   | 0  | 8.7  | 3.6  | 5.2  | -1.6  |
| 15-Sep   | 1  | 48.2 | 45.3 | 3.0  | 42.3  |
| ZNF623   | 13 | 7.8  | 1.0  | 6.9  | -5.9  |
| CCDC125  | 4  | 8.8  | 2.3  | 6.6  | -4.3  |
| BCOR     | 0  | 7.3  | 2.8  | 4.4  | -1.6  |
| FHL3     | 3  | 18.1 | 6.7  | 11.4 | -4.7  |
| CCDC159  | 0  | 8.8  | 4.2  | 4.6  | -0.4  |
| RIPK4    | 0  | 18.7 | 6.3  | 12.4 | -6.0  |
| NPIPA1   | 0  | 11.8 | 4.9  | 6.9  | -2.1  |
| SF3A3    | 6  | 51.5 | 6.6  | 44.9 | -38.3 |
| GTF2H2C  | 0  | 10.7 | 3.4  | 7.3  | -3.8  |
| EP400    | 0  | 12.4 | 4.9  | 7.5  | -2.6  |
| COA5     | 1  | 14.0 | 7.9  | 6.1  | 1.8   |
| UTP11L   | 1  | 15.1 | 10.9 | 4.2  | 6.6   |
| PSMG1    | 7  | 20.0 | 2.7  | 17.3 | -14.6 |
| PRR14L   | 1  | 8.5  | 4.9  | 3.6  | 1.4   |
| SETD3    | 0  | 7.8  | 3.6  | 4.2  | -0.6  |
| ZNRF3    | 0  | 11.8 | 5.5  | 6.3  | -0.8  |
| TANGO2   | 0  | 6.4  | 2.9  | 3.6  | -0.7  |
| SFXN4    | 0  | 17.8 | 6.9  | 10.9 | -3.9  |
| MRPL54   | 8  | 17.8 | 5.6  | 12.1 | -6.5  |
| HMCES    | 0  | 9.3  | 4.0  | 5.3  | -1.2  |
| DGCR6    | 2  | 20.8 | 9.0  | 11.8 | -2.7  |
| ZNF530   | 2  | 18.0 | 7.7  | 10.3 | -2.6  |
| NDUFB1   | 0  | 9.0  | 3.7  | 5.2  | -1.5  |
| TRMT12   | 2  | 13.2 | 4.5  | 8.7  | -4.2  |
| ALYREF   | 5  | 20.2 | 9.6  | 10.6 | -1.0  |
| UPP1     | 0  | 11.2 | 4.9  | 6.2  | -1.3  |
| TRIM52   | 1  | 13.9 | 9.5  | 4.3  | 5.2   |
| CMTM4    | 0  | 7.7  | 3.6  | 4.1  | -0.5  |
| TMEM50A  | 1  | 20.4 | 16.1 | 4.2  | 11.9  |
| TBK1     | 1  | 49.4 | 45.4 | 4.0  | 41.4  |
| CBX6     | 0  | 9.5  | 4.6  | 4.9  | -0.3  |
| TBL3     | 12 | 12.7 | 1.9  | 10.8 | -8.8  |
| TRAIIP   | 2  | 16.7 | 5.4  | 11.2 | -5.8  |
| CHEK2    | 0  | 14.4 | 5.0  | 9.4  | -4.4  |

|          |    |      |      |      |       |
|----------|----|------|------|------|-------|
| RBM12B   | 1  | 24.5 | 19.7 | 4.8  | 14.9  |
| LIN9     | 7  | 26.8 | 4.8  | 22.0 | -17.2 |
| NUDT14   | 2  | 17.5 | 7.7  | 9.8  | -2.2  |
| KIRREL   | 3  | 30.4 | 22.0 | 8.4  | 13.6  |
| IQGAP3   | 3  | 16.0 | 5.1  | 10.9 | -5.7  |
| TOB2     | 2  | 19.2 | 7.6  | 11.6 | -4.0  |
| TTC32    | 1  | 13.2 | 8.9  | 4.3  | 4.5   |
| KMT5A    | 0  | 7.2  | 3.1  | 4.1  | -1.0  |
| SMTN     | 0  | 12.3 | 4.9  | 7.4  | -2.4  |
| COA3     | 4  | 22.4 | 5.8  | 16.6 | -10.7 |
| PTP4A2   | 1  | 73.5 | 64.8 | 8.7  | 56.1  |
| ACTG1    | 3  | 13.0 | 6.2  | 6.8  | -0.6  |
| DENND5A  | 0  | 10.2 | 2.8  | 7.5  | -4.7  |
| DIABLO   | 0  | 8.2  | 3.8  | 4.4  | -0.7  |
| VPS33B   | 0  | 8.5  | 3.3  | 5.1  | -1.8  |
| UQCR10   | 5  | 14.6 | 3.6  | 11.0 | -7.4  |
| EIF3C    | 2  | 31.7 | 15.1 | 16.7 | -1.6  |
| NIPSNAP1 | 4  | 14.5 | 4.9  | 9.7  | -4.8  |
| LRTOMT   | 0  | 7.5  | 3.7  | 3.8  | -0.1  |
| NR2C2AP  | 8  | 16.1 | 2.5  | 13.6 | -11.1 |
| CRELD2   | 0  | 10.5 | 4.7  | 5.8  | -1.2  |
| SCFD2    | 2  | 12.5 | 4.6  | 7.9  | -3.3  |
| UBE2F    | 0  | 8.0  | 3.0  | 5.0  | -2.0  |
| PPP1R2   | 1  | 34.6 | 29.9 | 4.7  | 25.2  |
| TSPYL2   | 0  | 10.9 | 4.9  | 6.0  | -1.1  |
| PGP      | 12 | 34.0 | 5.2  | 28.8 | -23.7 |
| C22orf46 | 0  | 6.7  | 3.3  | 3.4  | -0.2  |
| SNRNP35  | 0  | 8.2  | 3.3  | 4.9  | -1.6  |
| IRAK1    | 0  | 11.6 | 4.9  | 6.7  | -1.9  |
| CMSS1    | 7  | 11.1 | 1.1  | 9.9  | -8.8  |
| OAF      | 2  | 12.8 | 3.6  | 9.3  | -5.7  |
| TM2D3    | 0  | 9.4  | 3.4  | 6.0  | -2.6  |
| TSSC4    | 8  | 10.2 | 1.4  | 8.9  | -7.5  |
| EFNA5    | 3  | 7.0  | 2.7  | 4.2  | -1.5  |
| CSF1     | 3  | 17.5 | 7.4  | 10.0 | -2.6  |
| PLA2G6   | 0  | 9.1  | 4.0  | 5.0  | -1.0  |
| SS18L1   | 1  | 13.4 | 7.4  | 6.0  | 1.4   |
| TOP1MT   | 13 | 13.2 | 2.4  | 10.8 | -8.4  |
| COPB2    | 1  | 62.8 | 59.5 | 3.3  | 56.2  |
| THAP7    | 2  | 22.1 | 10.0 | 12.1 | -2.1  |
| KNTC1    | 1  | 66.1 | 51.4 | 14.6 | 36.8  |
| WDR27    | 1  | 9.0  | 5.4  | 3.6  | 1.8   |
| TXNRD2   | 0  | 10.5 | 4.0  | 6.4  | -2.4  |
| PROS1    | 4  | 10.9 | 4.5  | 6.4  | -1.9  |
| HDDC3    | 0  | 12.0 | 4.5  | 7.4  | -2.9  |
| DUSP8    | 8  | 11.3 | 1.6  | 9.7  | -8.0  |
| SOCS3    | 3  | 12.8 | 4.7  | 8.1  | -3.5  |
| XPOT     | 1  | 81.1 | 75.7 | 5.4  | 70.2  |
| TMEM173  | 3  | 9.3  | 2.9  | 6.4  | -3.6  |
| SNN      | 2  | 14.1 | 4.0  | 10.1 | -6.1  |
| MED12    | 0  | 7.4  | 3.6  | 3.8  | -0.2  |
| 9-Sep    | 0  | 10.9 | 4.7  | 6.2  | -1.4  |
| CDCA2    | 7  | 12.4 | 2.5  | 9.9  | -7.3  |
| ZBTB40   | 0  | 15.7 | 7.6  | 8.1  | -0.6  |

|           |    |      |      |      |       |
|-----------|----|------|------|------|-------|
| EIF4ENIF1 | 0  | 7.2  | 3.0  | 4.2  | -1.2  |
| ATL3      | 0  | 10.7 | 4.5  | 6.2  | -1.7  |
| NDUFA12   | 1  | 17.4 | 10.8 | 6.7  | 4.1   |
| UBE2G2    | 0  | 6.8  | 2.5  | 4.2  | -1.7  |
| APOO      | 0  | 9.0  | 3.5  | 5.5  | -2.0  |
| TMED9     | 0  | 8.9  | 4.6  | 4.2  | 0.4   |
| TMEM186   | 12 | 21.0 | 2.8  | 18.2 | -15.4 |
| RBM33     | 0  | 12.5 | 5.3  | 7.2  | -1.8  |
| BTBD6     | 0  | 15.0 | 5.0  | 10.0 | -5.0  |
| H1FX      | 2  | 12.9 | 4.7  | 8.1  | -3.4  |
| SUMO3     | 0  | 9.7  | 3.7  | 6.1  | -2.4  |
| IMMP2L    | 0  | 10.8 | 4.1  | 6.8  | -2.7  |
| FMNL1     | 3  | 8.4  | 3.7  | 4.7  | -1.0  |
| PTRHD1    | 6  | 15.3 | 3.4  | 11.9 | -8.5  |
| ZFP90     | 0  | 5.9  | 2.6  | 3.3  | -0.7  |
| NOC4L     | 2  | 31.3 | 14.5 | 16.8 | -2.3  |
| NDUFA6    | 7  | 9.3  | 1.0  | 8.3  | -7.2  |
| SIVA1     | 0  | 7.4  | 2.7  | 4.7  | -2.0  |
| BRI3BP    | 4  | 23.8 | 9.2  | 14.6 | -5.4  |
| DGAT1     | 13 | 11.9 | 1.0  | 10.9 | -9.8  |
| AP3M1     | 1  | 23.3 | 17.7 | 5.6  | 12.1  |
| MAFF      | 0  | 11.6 | 4.7  | 6.9  | -2.1  |
| BRF1      | 2  | 14.9 | 4.8  | 10.0 | -5.2  |
| SEMA4B    | 0  | 13.5 | 6.3  | 7.3  | -1.0  |
| CIB1      | 4  | 18.6 | 4.5  | 14.1 | -9.6  |
| NELFA     | 2  | 25.1 | 9.2  | 15.9 | -6.7  |
| INTS5     | 2  | 51.5 | 28.5 | 23.0 | 5.6   |
| RPS27L    | 1  | 25.0 | 21.9 | 3.1  | 18.7  |
| MANEAL    | 2  | 16.2 | 6.2  | 10.0 | -3.8  |
| FAF1      | 0  | 9.8  | 3.7  | 6.1  | -2.4  |
| NSMCE3    | 0  | 8.8  | 3.9  | 4.9  | -1.0  |
| HSF1      | 13 | 9.1  | 3.0  | 6.1  | -3.0  |
| C6orf120  | 1  | 9.0  | 6.1  | 2.9  | 3.3   |
| LRRC37B   | 0  | 6.1  | 2.2  | 3.9  | -1.6  |
| DDX51     | 2  | 18.9 | 6.6  | 12.3 | -5.7  |
| NOMO2     | 11 | 19.1 | 1.4  | 17.7 | -16.3 |
| SIGIRR    | 2  | 12.2 | 3.8  | 8.4  | -4.6  |
| NRBP2     | 0  | 12.0 | 5.0  | 7.0  | -2.0  |
| IFITM2    | 3  | 11.3 | 5.1  | 6.2  | -1.1  |
| TNFAIP2   | 3  | 13.0 | 5.4  | 7.6  | -2.2  |
| WBP5      | 1  | 9.0  | 6.3  | 2.7  | 3.5   |
| RAB11B    | 8  | 14.7 | 4.3  | 10.5 | -6.2  |
| PRMT3     | 1  | 23.1 | 16.2 | 6.9  | 9.3   |
| PRPF39    | 1  | 61.4 | 55.1 | 6.3  | 48.8  |
| ZNF74     | 2  | 18.8 | 7.6  | 11.2 | -3.6  |
| UBALD2    | 0  | 7.9  | 2.2  | 5.7  | -3.5  |
| CCDC137   | 0  | 14.0 | 4.8  | 9.3  | -4.5  |
| ARL15     | 0  | 5.2  | 2.1  | 3.2  | -1.1  |
| CDK10     | 0  | 5.3  | 2.1  | 3.3  | -1.2  |
| TCN2      | 0  | 12.3 | 5.3  | 7.0  | -1.8  |
| GAS2L1    | 3  | 17.1 | 4.6  | 12.5 | -7.9  |
| ATP6VOA2  | 0  | 11.2 | 5.2  | 5.9  | -0.7  |
| C14orf80  | 2  | 21.1 | 7.9  | 13.2 | -5.3  |
| HGS       | 6  | 11.8 | 2.5  | 9.3  | -6.8  |

|           |    |      |      |      |       |
|-----------|----|------|------|------|-------|
| TNFAIP8L1 | 4  | 27.1 | 5.7  | 21.5 | -15.8 |
| RAD51D    | 0  | 10.1 | 4.2  | 5.9  | -1.8  |
| SP140L    | 3  | 7.3  | 2.3  | 5.0  | -2.7  |
| MRPL30    | 1  | 22.7 | 13.9 | 8.8  | 5.1   |
| SMYD3     | 0  | 6.7  | 2.8  | 3.9  | -1.1  |
| METTL7A   | 4  | 19.1 | 11.0 | 8.1  | 2.9   |
| TMEM179B  | 2  | 11.0 | 4.0  | 7.0  | -3.0  |
| PARPBP    | 7  | 28.8 | 4.4  | 24.4 | -20.1 |
| FAAP100   | 2  | 15.0 | 5.0  | 10.0 | -5.0  |
| BRCC3     | 1  | 18.3 | 13.5 | 4.8  | 8.7   |
| NR2F2     | 1  | 7.4  | 3.9  | 3.4  | 0.5   |
| AHNAK2    | 3  | 17.6 | 10.3 | 7.3  | 3.0   |
| SP1       | 0  | 14.1 | 6.0  | 8.0  | -2.0  |
| MRPL40    | 0  | 11.7 | 4.3  | 7.4  | -3.0  |
| PCGF3     | 0  | 11.3 | 5.2  | 6.1  | -0.9  |
| P4HB      | 6  | 14.2 | 4.1  | 10.2 | -6.1  |
| PSMD13    | 0  | 10.4 | 4.3  | 6.1  | -1.7  |
| PBX1      | 0  | 5.6  | 2.6  | 3.1  | -0.5  |
| ZFP36L1   | 3  | 14.0 | 6.5  | 7.5  | -1.0  |
| UBE2L3    | 0  | 11.5 | 4.3  | 7.2  | -2.9  |
| BRWD1     | 0  | 5.4  | 1.9  | 3.5  | -1.7  |
| EP400NL   | 0  | 10.0 | 4.3  | 5.8  | -1.5  |
| MYBL1     | 7  | 18.1 | 2.1  | 16.0 | -13.9 |
| C16orf52  | 0  | 7.4  | 3.0  | 4.4  | -1.4  |
| DRG1      | 6  | 18.1 | 3.1  | 14.9 | -11.8 |
| ANKFY1    | 0  | 10.1 | 4.4  | 5.6  | -1.2  |
| YTHDF3    | 1  | 31.8 | 28.4 | 3.3  | 25.1  |
| ZNF696    | 2  | 31.4 | 15.8 | 15.7 | 0.1   |
| CXorf38   | 0  | 10.3 | 4.1  | 6.2  | -2.2  |
| ADAMTSL5  | 0  | 8.3  | 3.3  | 5.0  | -1.7  |
| MORF4L1   | 1  | 50.8 | 47.3 | 3.4  | 43.9  |
| WDR53     | 0  | 9.9  | 3.1  | 6.8  | -3.7  |
| DMWD      | 0  | 13.4 | 6.2  | 7.2  | -1.0  |
| SLC52A2   | 13 | 10.7 | 2.3  | 8.4  | -6.1  |
| PIGP      | 0  | 6.5  | 2.3  | 4.2  | -1.9  |
| PCYT2     | 4  | 19.5 | 6.9  | 12.6 | -5.7  |
| BCAP31    | 0  | 12.0 | 5.9  | 6.1  | -0.1  |
| ARL17A    | 0  | 7.9  | 3.3  | 4.6  | -1.2  |
| GNB1L     | 2  | 23.2 | 10.6 | 12.6 | -2.0  |
| DNAH14    | 1  | 21.1 | 12.8 | 8.3  | 4.4   |
| NP1PB4    | 1  | 10.6 | 7.9  | 2.7  | 5.2   |
| TRIM69    | 0  | 8.9  | 4.2  | 4.7  | -0.5  |
| ATP6VOC   | 12 | 15.8 | 1.6  | 14.1 | -12.5 |
| IFITM1    | 0  | 5.7  | 2.5  | 3.2  | -0.7  |
| LAMP1     | 0  | 8.0  | 4.0  | 4.0  | 0.0   |
| KLHDC8B   | 0  | 7.4  | 4.1  | 3.2  | 0.9   |
| SETD4     | 0  | 5.9  | 2.8  | 3.1  | -0.4  |
| PTCH1     | 1  | 13.5 | 8.2  | 5.3  | 2.9   |
| RNPC3     | 1  | 16.3 | 13.2 | 3.1  | 10.1  |
| ZNF267    | 0  | 5.3  | 1.7  | 3.6  | -1.9  |
| BICD2     | 10 | 12.2 | 2.3  | 9.8  | -7.5  |
| TMLHE     | 0  | 7.6  | 3.8  | 3.8  | 0.0   |
| RASA3     | 3  | 12.8 | 6.1  | 6.7  | -0.7  |
| LRCH3     | 6  | 21.1 | 3.9  | 17.3 | -13.4 |



|          |    |      |      |      |       |
|----------|----|------|------|------|-------|
| NDUFA13  | 0  | 9.1  | 3.9  | 5.2  | -1.3  |
| AIDA     | 1  | 50.7 | 42.7 | 8.0  | 34.6  |
| C15orf41 | 0  | 6.6  | 2.6  | 4.0  | -1.5  |
| CYP2R1   | 0  | 6.8  | 2.2  | 4.6  | -2.4  |
| ANKRD46  | 0  | 11.9 | 4.2  | 7.7  | -3.5  |
| PIP5K1C  | 8  | 33.6 | 6.1  | 27.5 | -21.4 |
| C2orf76  | 0  | 7.3  | 2.8  | 4.5  | -1.7  |
| POLR3C   | 9  | 12.7 | 4.5  | 8.2  | -3.7  |
| WWOX     | 0  | 12.5 | 4.2  | 8.3  | -4.1  |
| CCDC84   | 0  | 9.0  | 4.0  | 5.0  | -1.0  |
| BCL9L    | 3  | 12.7 | 5.5  | 7.2  | -1.6  |
| POLR1D   | 0  | 12.9 | 5.0  | 7.9  | -2.9  |
| KIF18B   | 5  | 19.5 | 8.3  | 11.1 | -2.8  |
| ZNRF1    | 0  | 12.9 | 5.7  | 7.2  | -1.5  |
| SAPCD2   | 0  | 9.6  | 3.2  | 6.4  | -3.2  |
| BLOC1S4  | 2  | 22.6 | 9.5  | 13.1 | -3.6  |
| ZNF749   | 2  | 12.9 | 5.2  | 7.7  | -2.5  |
| MKL2     | 1  | 12.9 | 8.3  | 4.6  | 3.8   |
| TOR3A    | 9  | 17.3 | 1.9  | 15.4 | -13.4 |
| PPP1CC   | 1  | 81.0 | 73.7 | 7.3  | 66.4  |
| PRELID2  | 0  | 12.1 | 4.5  | 7.5  | -3.0  |
| BACE1    | 0  | 11.7 | 6.0  | 5.7  | 0.4   |
| RXRA     | 10 | 16.2 | 1.9  | 14.3 | -12.4 |
| KRT10    | 0  | 13.9 | 5.3  | 8.6  | -3.3  |
| NKRF     | 0  | 8.6  | 3.0  | 5.6  | -2.6  |
| KPNA4    | 1  | 63.2 | 49.8 | 13.4 | 36.4  |
| RPS23    | 1  | 15.0 | 8.9  | 6.1  | 2.9   |
| BTN3A2   | 0  | 13.3 | 5.8  | 7.5  | -1.7  |
| INSIG1   | 0  | 5.6  | 2.2  | 3.4  | -1.1  |
| TMEM222  | 2  | 25.6 | 10.2 | 15.4 | -5.2  |
| 10-Sep   | 1  | 71.4 | 63.1 | 8.3  | 54.7  |
| SMYD4    | 0  | 13.3 | 5.6  | 7.7  | -2.2  |
| GPATCH8  | 0  | 14.4 | 6.2  | 8.2  | -2.0  |
| NF2      | 3  | 21.9 | 10.0 | 11.9 | -1.8  |
| C6orf1   | 3  | 19.3 | 8.5  | 10.8 | -2.3  |
| UBE2H    | 3  | 17.3 | 8.3  | 9.0  | -0.7  |
| KATNA1   | 6  | 16.3 | 1.1  | 15.2 | -14.0 |
| ARAP1    | 0  | 6.2  | 3.2  | 3.0  | 0.3   |
| ZFP91    | 1  | 10.7 | 6.5  | 4.2  | 2.2   |
| C17orf58 | 0  | 11.3 | 4.2  | 7.0  | -2.8  |
| LYRM7    | 1  | 21.6 | 14.1 | 7.5  | 6.6   |
| BCR      | 0  | 7.5  | 3.5  | 4.0  | -0.4  |
| HYAL3    | 2  | 17.9 | 7.7  | 10.2 | -2.6  |
| ZNF397   | 0  | 7.3  | 3.3  | 4.0  | -0.7  |
| TPCN1    | 0  | 10.2 | 4.5  | 5.6  | -1.1  |
| HEXIM1   | 0  | 8.4  | 3.4  | 5.1  | -1.7  |
| POFUT2   | 0  | 12.7 | 6.5  | 6.2  | 0.3   |
| ERCC6L   | 7  | 27.4 | 5.6  | 21.7 | -16.1 |
| RTN4RL2  | 0  | 9.8  | 3.9  | 5.9  | -2.0  |
| ZDHHC17  | 1  | 43.4 | 38.6 | 4.7  | 33.9  |
| ZNF395   | 0  | 8.3  | 3.5  | 4.8  | -1.3  |
| PPARA    | 2  | 13.2 | 3.9  | 9.2  | -5.3  |
| PTRH1    | 2  | 41.2 | 22.7 | 18.4 | 4.3   |
| TMEM216  | 0  | 12.4 | 5.1  | 7.3  | -2.2  |

|           |    |       |       |      |       |
|-----------|----|-------|-------|------|-------|
| RPS19BP1  | 2  | 20.8  | 8.9   | 11.9 | -3.0  |
| TEAD1     | 1  | 31.8  | 21.9  | 9.8  | 12.1  |
| ENTPD5    | 4  | 21.6  | 11.9  | 9.7  | 2.2   |
| MITF      | 0  | 9.7   | 2.1   | 7.6  | -5.5  |
| NAP1L1    | 1  | 107.1 | 100.4 | 6.7  | 93.8  |
| CMC1      | 0  | 12.5  | 5.4   | 7.0  | -1.6  |
| AKR1C1    | 4  | 14.3  | 5.1   | 9.2  | -4.1  |
| SPATA21   | 0  | 18.2  | 7.5   | 10.7 | -3.2  |
| RNF220    | 2  | 12.6  | 4.1   | 8.5  | -4.4  |
| SHTN1     | 1  | 11.9  | 6.6   | 5.3  | 1.3   |
| RP11-195F | 2  | 17.9  | 6.3   | 11.6 | -5.3  |
| TSPYL4    | 0  | 8.6   | 4.3   | 4.3  | 0.0   |
| MT1X      | 3  | 9.5   | 2.8   | 6.7  | -3.9  |
| SESTD1    | 1  | 16.4  | 11.7  | 4.7  | 7.0   |
| FNBP1     | 0  | 6.8   | 2.4   | 4.4  | -2.0  |
| BCAM      | 0  | 7.4   | 3.5   | 3.9  | -0.4  |
| RSBN1L    | 1  | 16.0  | 11.6  | 4.4  | 7.3   |
| TAF9B     | 1  | 30.0  | 21.0  | 9.0  | 12.0  |
| CHP1      | 4  | 15.0  | 6.2   | 8.8  | -2.6  |
| COL4A1    | 3  | 16.6  | 10.6  | 5.9  | 4.7   |
| PTMA      | 0  | 9.8   | 4.0   | 5.9  | -1.9  |
| HSPA14    | 7  | 16.3  | 2.5   | 13.8 | -11.2 |
| SIRT7     | 2  | 27.4  | 11.4  | 16.0 | -4.6  |
| IFT140    | 0  | 9.4   | 4.5   | 4.8  | -0.3  |
| USP7      | 1  | 67.2  | 60.4  | 6.8  | 53.6  |
| ZNF286A   | 1  | 14.6  | 9.5   | 5.1  | 4.5   |
| ISG15     | 0  | 9.5   | 4.0   | 5.5  | -1.4  |
| DHRS4L2   | 2  | 18.0  | 7.3   | 10.8 | -3.5  |
| SAMD11    | 0  | 9.0   | 3.5   | 5.5  | -2.0  |
| SPRY4     | 2  | 18.4  | 5.3   | 13.1 | -7.7  |
| TMEM203   | 10 | 33.5  | 7.7   | 25.8 | -18.0 |
| TCEA1     | 1  | 48.5  | 45.4  | 3.1  | 42.3  |
| NHEJ1     | 0  | 10.1  | 4.6   | 5.5  | -0.8  |
| FANCA     | 7  | 15.6  | 1.8   | 13.8 | -12.0 |
| SECISBP2  | 1  | 13.7  | 10.0  | 3.7  | 6.3   |
| MCRS1     | 2  | 20.6  | 6.5   | 14.1 | -7.6  |
| HIST1H1C  | 0  | 8.7   | 4.3   | 4.4  | -0.2  |
| EIF4EBP1  | 0  | 9.5   | 3.8   | 5.8  | -2.0  |
| ARHGAP11F | 7  | 13.9  | 1.9   | 12.1 | -10.2 |
| CYHR1     | 13 | 18.9  | 3.6   | 15.3 | -11.7 |
| KLHL17    | 2  | 20.5  | 8.8   | 11.7 | -2.9  |
| MORN2     | 0  | 9.6   | 4.2   | 5.4  | -1.3  |
| S100A3    | 3  | 10.5  | 3.8   | 6.7  | -2.9  |
| UBQLN2    | 0  | 6.7   | 3.1   | 3.6  | -0.6  |
| ARL4C     | 3  | 12.4  | 6.1   | 6.2  | -0.1  |
| MAPK12    | 0  | 8.1   | 3.5   | 4.5  | -1.0  |
| COL4A5    | 0  | 5.9   | 2.5   | 3.5  | -1.0  |
| AGRN      | 3  | 16.1  | 7.6   | 8.5  | -0.9  |
| LAMTOR4   | 2  | 20.3  | 10.2  | 10.1 | 0.1   |
| PRKAR1B   | 2  | 12.3  | 4.1   | 8.2  | -4.1  |
| TUBB4B    | 5  | 20.3  | 7.4   | 12.9 | -5.6  |
| COMMD6    | 1  | 9.0   | 5.3   | 3.8  | 1.5   |
| HES4      | 2  | 28.9  | 15.8  | 13.1 | 2.7   |
| CENPP     | 0  | 8.6   | 3.0   | 5.6  | -2.6  |

|           |    |       |       |      |       |
|-----------|----|-------|-------|------|-------|
| PLSCR1    | 3  | 10.7  | 3.6   | 7.1  | -3.5  |
| ZNF559    | 1  | 15.6  | 11.7  | 3.8  | 7.9   |
| GTF2F2    | 1  | 15.6  | 8.7   | 6.9  | 1.9   |
| FAM92A1   | 1  | 13.5  | 6.7   | 6.8  | -0.1  |
| FOCAD     | 0  | 6.2   | 2.1   | 4.1  | -2.0  |
| CHM       | 1  | 17.8  | 14.5  | 3.3  | 11.1  |
| IER5L     | 2  | 24.9  | 10.9  | 14.0 | -3.2  |
| H2AFX     | 5  | 18.6  | 5.0   | 13.6 | -8.7  |
| SERPINA5  | 4  | 11.8  | 5.8   | 6.0  | -0.3  |
| C19orf54  | 0  | 12.2  | 5.6   | 6.6  | -1.0  |
| FAM83G    | 2  | 16.9  | 5.3   | 11.6 | -6.3  |
| SRSF10    | 1  | 130.0 | 124.2 | 5.8  | 118.4 |
| C15orf52  | 3  | 24.2  | 16.3  | 7.9  | 8.4   |
| NBR1      | 0  | 8.2   | 2.8   | 5.5  | -2.7  |
| RALGAPA2  | 4  | 11.4  | 3.0   | 8.4  | -5.4  |
| NDOR1     | 10 | 27.0  | 3.8   | 23.2 | -19.4 |
| CLN3      | 4  | 14.4  | 3.9   | 10.5 | -6.5  |
| FAM72B    | 0  | 10.5  | 4.0   | 6.5  | -2.5  |
| SUMO2     | 6  | 30.8  | 10.2  | 20.5 | -10.3 |
| S100A16   | 0  | 9.2   | 4.0   | 5.2  | -1.2  |
| PTAR1     | 1  | 22.6  | 19.7  | 2.9  | 16.7  |
| PARVB     | 0  | 11.5  | 4.4   | 7.2  | -2.8  |
| UROS      | 0  | 16.9  | 6.2   | 10.7 | -4.6  |
| ZDHHC9    | 4  | 13.3  | 4.1   | 9.2  | -5.1  |
| ZBED6CL   | 0  | 8.9   | 3.8   | 5.1  | -1.3  |
| SMIM15    | 1  | 75.9  | 71.1  | 4.9  | 66.2  |
| TMEM120B  | 2  | 20.5  | 9.2   | 11.4 | -2.2  |
| RBM34     | 1  | 60.5  | 56.0  | 4.6  | 51.4  |
| ZNF548    | 0  | 5.8   | 2.4   | 3.5  | -1.1  |
| TMEM201   | 2  | 31.0  | 14.1  | 16.9 | -2.8  |
| NHLRC3    | 0  | 7.1   | 1.7   | 5.4  | -3.7  |
| RPL14     | 6  | 79.9  | 15.8  | 64.1 | -48.3 |
| MSL1      | 1  | 9.3   | 5.6   | 3.7  | 1.9   |
| TRMT2B    | 2  | 16.2  | 4.6   | 11.6 | -7.1  |
| FAM120AOS | 10 | 11.4  | 1.4   | 9.9  | -8.5  |
| NOC2L     | 2  | 18.9  | 8.0   | 10.9 | -3.0  |
| NELFB     | 10 | 26.1  | 8.0   | 18.0 | -10.0 |
| KCTD21    | 0  | 12.9  | 5.3   | 7.5  | -2.2  |
| NDUFA4    | 6  | 32.4  | 15.6  | 16.8 | -1.2  |
| ALKBH2    | 2  | 13.4  | 4.8   | 8.6  | -3.8  |
| RNFT1     | 1  | 18.8  | 15.6  | 3.2  | 12.3  |
| FAM111B   | 7  | 14.2  | 2.6   | 11.6 | -9.0  |
| H1FO      | 0  | 7.7   | 3.4   | 4.3  | -0.9  |
| GAGE2A    | 0  | 5.8   | 2.8   | 3.0  | -0.2  |
| LITAF     | 0  | 8.4   | 4.0   | 4.4  | -0.4  |
| TMEM120A  | 0  | 10.2  | 4.1   | 6.1  | -2.0  |
| ARID2     | 1  | 26.5  | 21.4  | 5.1  | 16.3  |
| SF3B3     | 6  | 13.4  | 2.7   | 10.8 | -8.1  |
| BLOC1S3   | 2  | 16.5  | 6.1   | 10.4 | -4.2  |
| CLDN4     | 0  | 12.3  | 4.6   | 7.8  | -3.2  |
| HN1       | 5  | 22.9  | 13.7  | 9.2  | 4.5   |
| S100A13   | 3  | 9.4   | 2.7   | 6.7  | -4.0  |
| ZNF33A    | 1  | 8.5   | 6.2   | 2.3  | 3.9   |
| MAOA      | 4  | 10.9  | 3.9   | 7.0  | -3.1  |

|           |    |      |      |      |       |
|-----------|----|------|------|------|-------|
| TSPYL1    | 0  | 4.5  | 1.9  | 2.6  | -0.7  |
| PNRC2     | 1  | 85.7 | 75.2 | 10.6 | 64.6  |
| RRP7A     | 0  | 11.6 | 4.4  | 7.1  | -2.7  |
| LIN54     | 1  | 18.4 | 14.4 | 4.0  | 10.4  |
| FAM53B    | 2  | 46.1 | 25.7 | 20.4 | 5.4   |
| SLC35E2B  | 0  | 17.5 | 8.7  | 8.8  | -0.1  |
| C8orf76   | 0  | 9.7  | 2.8  | 6.8  | -4.0  |
| HMGB1     | 1  | 43.1 | 38.3 | 4.9  | 33.4  |
| BLOC1S2   | 1  | 21.6 | 17.3 | 4.3  | 13.0  |
| IL1RAP    | 0  | 7.7  | 2.8  | 4.9  | -2.1  |
| TDRD7     | 0  | 6.9  | 2.5  | 4.4  | -2.0  |
| CCDC189   | 11 | 26.3 | 2.6  | 23.6 | -21.0 |
| KIAA0895I | 0  | 13.1 | 6.7  | 6.3  | 0.4   |
| SPATS2L   | 0  | 9.6  | 4.2  | 5.4  | -1.2  |
| WDSUB1    | 0  | 8.2  | 3.8  | 4.3  | -0.5  |
| S100A4    | 0  | 6.0  | 2.4  | 3.6  | -1.1  |
| PLEKHG4   | 0  | 8.4  | 4.1  | 4.4  | -0.3  |
| ACADSB    | 1  | 17.8 | 11.1 | 6.7  | 4.4   |
| STK40     | 0  | 11.5 | 4.7  | 6.8  | -2.1  |
| TMEM63A   | 2  | 14.4 | 3.8  | 10.6 | -6.9  |
| MPHOSPH8  | 1  | 22.8 | 20.3 | 2.5  | 17.8  |
| ZNF766    | 1  | 9.0  | 5.9  | 3.1  | 2.8   |
| FAM217B   | 1  | 23.9 | 17.7 | 6.1  | 11.6  |
| TUBB      | 5  | 17.9 | 6.8  | 11.1 | -4.3  |
| LCOR      | 1  | 13.3 | 9.2  | 4.1  | 5.1   |
| SUPT5H    | 0  | 9.3  | 5.3  | 4.0  | 1.3   |
| XPNPEP3   | 0  | 5.4  | 2.2  | 3.2  | -0.9  |
| PPIA      | 0  | 12.2 | 4.5  | 7.7  | -3.3  |
| SUPT3H    | 0  | 7.9  | 3.3  | 4.6  | -1.3  |
| NIF3L1    | 0  | 13.0 | 4.2  | 8.8  | -4.6  |
| IARS      | 1  | 58.8 | 52.2 | 6.6  | 45.6  |
| MFSD14C   | 2  | 24.2 | 11.0 | 13.2 | -2.3  |
| POM121    | 2  | 27.0 | 10.4 | 16.6 | -6.2  |
| ZBTB44    | 1  | 13.5 | 9.0  | 4.5  | 4.6   |
| CD55      | 0  | 7.9  | 2.3  | 5.5  | -3.2  |
| WDR5      | 10 | 24.4 | 6.6  | 17.8 | -11.2 |
| LONP1     | 8  | 12.5 | 2.2  | 10.4 | -8.2  |
| TRRAP     | 0  | 12.4 | 6.5  | 5.9  | 0.6   |
| ASB13     | 2  | 24.7 | 10.0 | 14.8 | -4.8  |
| ZNF140    | 0  | 6.6  | 2.7  | 3.9  | -1.2  |
| PTPN1     | 0  | 10.0 | 4.1  | 5.9  | -1.8  |
| EVL       | 0  | 9.4  | 3.7  | 5.7  | -2.0  |
| EPHB4     | 2  | 14.1 | 4.5  | 9.6  | -5.0  |
| ZNF124    | 0  | 14.4 | 4.6  | 9.8  | -5.2  |
| XRCC6     | 7  | 18.2 | 1.9  | 16.3 | -14.5 |
| PPP1R26   | 2  | 16.7 | 5.6  | 11.2 | -5.6  |
| TSC22D2   | 1  | 10.4 | 4.5  | 5.9  | -1.4  |
| YRDC      | 2  | 19.6 | 7.9  | 11.8 | -3.9  |
| ZNF777    | 2  | 35.6 | 19.5 | 16.1 | 3.4   |
| PIK3R4    | 1  | 23.0 | 16.1 | 6.9  | 9.1   |
| TRAPPC2   | 1  | 10.1 | 5.6  | 4.5  | 1.1   |
| MYL6B     | 0  | 10.3 | 5.3  | 5.0  | 0.3   |
| SIAH1     | 0  | 8.4  | 2.8  | 5.6  | -2.8  |
| C20orf96  | 0  | 10.2 | 5.5  | 4.7  | 0.8   |

|          |    |       |       |      |       |
|----------|----|-------|-------|------|-------|
| IPO4     | 2  | 19.7  | 5.7   | 14.0 | -8.3  |
| NCOR2    | 3  | 11.1  | 5.2   | 6.0  | -0.8  |
| SULT1A1  | 4  | 17.4  | 6.4   | 11.0 | -4.6  |
| PRPF40A  | 1  | 134.9 | 122.1 | 12.8 | 109.3 |
| GDAP2    | 1  | 11.7  | 6.7   | 5.0  | 1.7   |
| TCEAL3   | 3  | 11.4  | 4.9   | 6.5  | -1.6  |
| ANAPC7   | 1  | 29.2  | 18.4  | 10.8 | 7.6   |
| AFAP1    | 3  | 13.9  | 7.0   | 6.9  | 0.2   |
| NACA     | 1  | 96.0  | 89.9  | 6.1  | 83.8  |
| MYO18A   | 0  | 6.4   | 2.4   | 4.0  | -1.6  |
| MAN2A2   | 0  | 11.2  | 4.4   | 6.8  | -2.4  |
| FAM72A   | 0  | 9.7   | 3.6   | 6.1  | -2.6  |
| CACNA1H  | 0  | 11.2  | 4.0   | 7.2  | -3.3  |
| SULF2    | 0  | 4.2   | 1.6   | 2.6  | -1.0  |
| PLXNB2   | 3  | 16.3  | 6.0   | 10.3 | -4.3  |
| XRCC2    | 7  | 16.6  | 2.6   | 14.0 | -11.4 |
| MYO6     | 4  | 9.9   | 3.1   | 6.8  | -3.7  |
| MKL1     | 3  | 20.7  | 9.8   | 10.9 | -1.0  |
| HDAC2    | 1  | 98.7  | 93.1  | 5.5  | 87.6  |
| SDHAF3   | 1  | 16.2  | 9.2   | 7.0  | 2.2   |
| ZKSCAN5  | 0  | 6.6   | 3.1   | 3.5  | -0.4  |
| TRAPPC4  | 0  | 10.7  | 4.9   | 5.8  | -0.9  |
| TECPR2   | 0  | 12.0  | 6.1   | 6.0  | 0.1   |
| ZFP62    | 1  | 13.4  | 9.1   | 4.3  | 4.7   |
| ERI2     | 1  | 12.2  | 9.0   | 3.2  | 5.9   |
| TOMM7    | 6  | 17.0  | 8.0   | 9.1  | -1.1  |
| ZNF33B   | 1  | 9.8   | 6.3   | 3.5  | 2.8   |
| ZNF512B  | 11 | 14.8  | 1.0   | 13.7 | -12.7 |
| AMZ2     | 1  | 11.5  | 5.0   | 6.5  | -1.5  |
| NF1      | 1  | 45.4  | 40.7  | 4.7  | 36.0  |
| VKORC1L1 | 0  | 7.1   | 2.6   | 4.4  | -1.8  |
| DAPK1    | 0  | 6.3   | 2.5   | 3.8  | -1.2  |
| COL27A1  | 4  | 9.4   | 2.2   | 7.1  | -4.9  |
| GM2A     | 0  | 9.6   | 4.4   | 5.2  | -0.7  |
| S100A2   | 3  | 16.1  | 9.7   | 6.4  | 3.3   |
| CD47     | 3  | 11.9  | 5.5   | 6.4  | -0.9  |
| TLE1     | 0  | 8.9   | 3.0   | 5.9  | -2.9  |
| STRN3    | 1  | 35.8  | 30.5  | 5.4  | 25.1  |
| C6orf106 | 0  | 11.8  | 4.9   | 6.9  | -2.0  |
| ADA      | 3  | 7.6   | 2.2   | 5.5  | -3.3  |
| ARID5A   | 2  | 17.1  | 6.6   | 10.4 | -3.8  |
| PPTC7    | 1  | 20.3  | 15.1  | 5.2  | 9.9   |
| LAMB3    | 3  | 7.0   | 2.1   | 5.0  | -2.9  |
| ARHGEF12 | 1  | 25.4  | 21.2  | 4.1  | 17.1  |
| PDLIM7   | 3  | 19.7  | 12.7  | 7.0  | 5.7   |
| FLNA     | 3  | 6.6   | 2.6   | 4.0  | -1.4  |
| FAM3C    | 1  | 14.1  | 8.8   | 5.3  | 3.5   |
| NOP9     | 0  | 10.7  | 4.6   | 6.1  | -1.5  |
| SLC39A10 | 1  | 14.0  | 11.7  | 2.3  | 9.5   |
| CASP4    | 0  | 7.3   | 3.0   | 4.2  | -1.2  |
| AP2A1    | 3  | 19.8  | 6.0   | 13.8 | -7.8  |
| ZNF585A  | 0  | 6.2   | 2.8   | 3.4  | -0.5  |
| FUT11    | 0  | 11.9  | 6.0   | 5.9  | 0.1   |
| ANXA4    | 4  | 14.2  | 6.3   | 8.0  | -1.7  |

|          |    |      |      |      |       |
|----------|----|------|------|------|-------|
| LAGE3    | 0  | 16.2 | 6.3  | 9.9  | -3.6  |
| WDR45    | 0  | 7.9  | 4.1  | 3.8  | 0.4   |
| METTL9   | 1  | 15.6 | 12.6 | 3.0  | 9.6   |
| SERTAD1  | 2  | 18.6 | 8.5  | 10.1 | -1.6  |
| CXorf40B | 2  | 20.2 | 6.5  | 13.7 | -7.2  |
| ZSCAN25  | 0  | 9.0  | 4.6  | 4.4  | 0.2   |
| ANXA6    | 3  | 8.6  | 3.2  | 5.4  | -2.2  |
| GMFB     | 1  | 71.4 | 65.5 | 6.0  | 59.5  |
| ZMYM1    | 1  | 18.3 | 13.3 | 5.0  | 8.2   |
| ZSCAN26  | 0  | 10.6 | 2.7  | 7.8  | -5.1  |
| MAFG     | 9  | 12.1 | 1.2  | 10.9 | -9.7  |
| ARRDC1   | 10 | 23.5 | 3.4  | 20.1 | -16.7 |
| KIAA1671 | 2  | 19.7 | 5.0  | 14.7 | -9.7  |
| IGF2R    | 0  | 8.5  | 3.0  | 5.6  | -2.6  |
| DYNC1H1  | 1  | 31.3 | 23.3 | 8.0  | 15.3  |
| PCBP2    | 0  | 8.7  | 4.1  | 4.6  | -0.6  |
| ZGPAT    | 2  | 19.0 | 7.6  | 11.5 | -3.9  |
| SLC25A29 | 0  | 12.7 | 5.5  | 7.2  | -1.7  |
| SRC      | 4  | 10.9 | 3.6  | 7.4  | -3.8  |
| PCNXL3   | 2  | 16.4 | 6.3  | 10.0 | -3.7  |
| ACSL5    | 0  | 7.7  | 3.3  | 4.4  | -1.0  |
| ABCB8    | 2  | 17.4 | 5.8  | 11.7 | -5.9  |
| SND1     | 0  | 4.7  | 2.1  | 2.6  | -0.5  |
| PSMD12   | 1  | 48.6 | 42.1 | 6.5  | 35.6  |
| MAGEA6   | 0  | 7.4  | 3.3  | 4.1  | -0.7  |
| NOL4L    | 0  | 6.3  | 2.8  | 3.5  | -0.8  |
| ENTPD4   | 1  | 13.5 | 7.7  | 5.8  | 1.9   |
| C1D      | 1  | 20.5 | 17.6 | 2.9  | 14.6  |
| TBC1D9B  | 0  | 7.6  | 2.8  | 4.7  | -1.9  |
| SERPINA1 | 4  | 18.6 | 9.9  | 8.7  | 1.2   |
| KANK2    | 3  | 20.3 | 10.9 | 9.4  | 1.5   |
| C6orf141 | 0  | 6.7  | 2.8  | 3.9  | -1.1  |
| GTF2E2   | 6  | 8.5  | 1.1  | 7.5  | -6.4  |
| RAD54B   | 1  | 21.0 | 14.6 | 6.4  | 8.3   |
| SYNGAP1  | 0  | 8.9  | 4.3  | 4.6  | -0.3  |
| FITM2    | 2  | 15.9 | 6.1  | 9.8  | -3.8  |
| BLM      | 1  | 32.6 | 22.4 | 10.2 | 12.2  |
| ZNF720   | 0  | 10.0 | 3.7  | 6.4  | -2.7  |
| DDI2     | 0  | 14.9 | 4.4  | 10.5 | -6.1  |
| SVIL     | 3  | 13.3 | 5.8  | 7.5  | -1.7  |
| TRIM33   | 1  | 58.0 | 52.6 | 5.4  | 47.2  |
| LRP10    | 0  | 12.0 | 5.5  | 6.6  | -1.1  |
| ZNF655   | 0  | 7.6  | 2.0  | 5.6  | -3.6  |
| MRPL21   | 0  | 8.9  | 3.7  | 5.1  | -1.4  |
| UAP1L1   | 0  | 5.6  | 2.5  | 3.1  | -0.5  |
| SLC22A5  | 0  | 6.9  | 3.0  | 3.9  | -0.8  |
| ADARB1   | 0  | 8.6  | 2.6  | 6.0  | -3.4  |
| HTT      | 6  | 11.7 | 2.2  | 9.5  | -7.3  |
| SHPK     | 2  | 29.9 | 13.3 | 16.6 | -3.3  |
| IPP      | 0  | 6.1  | 3.1  | 3.0  | 0.2   |
| GSTK1    | 0  | 14.8 | 5.9  | 8.9  | -3.0  |
| HNRNPAB  | 0  | 13.1 | 5.0  | 8.1  | -3.1  |
| PDGFA    | 0  | 5.5  | 2.6  | 2.9  | -0.3  |
| RPF2     | 1  | 38.1 | 28.0 | 10.2 | 17.8  |

|           |    |      |      |      |       |
|-----------|----|------|------|------|-------|
| MIB2      | 2  | 23.2 | 7.8  | 15.3 | -7.5  |
| MYO5A     | 1  | 18.6 | 12.8 | 5.8  | 7.0   |
| ATG7      | 3  | 11.6 | 3.2  | 8.4  | -5.2  |
| SIPA1L1   | 0  | 8.5  | 4.0  | 4.5  | -0.4  |
| RAB40C    | 12 | 24.3 | 3.6  | 20.7 | -17.1 |
| PIGN      | 1  | 9.1  | 4.8  | 4.2  | 0.6   |
| HHLA3     | 0  | 13.6 | 5.4  | 8.3  | -2.9  |
| TOPORS    | 1  | 14.5 | 12.0 | 2.5  | 9.5   |
| ENTPD6    | 0  | 11.1 | 4.2  | 6.9  | -2.7  |
| ZNF841    | 1  | 7.6  | 4.7  | 2.9  | 1.8   |
| CXorf40A  | 2  | 25.8 | 9.6  | 16.2 | -6.6  |
| CDC42SE1  | 9  | 13.6 | 2.7  | 10.9 | -8.2  |
| DPP4      | 4  | 7.5  | 2.6  | 4.9  | -2.3  |
| SPTAN1    | 3  | 6.7  | 2.1  | 4.7  | -2.6  |
| NMB       | 2  | 11.6 | 3.5  | 8.1  | -4.6  |
| PARVA     | 3  | 18.0 | 9.7  | 8.3  | 1.5   |
| FAM114A1  | 3  | 14.8 | 7.0  | 7.9  | -0.9  |
| RPE       | 1  | 34.3 | 28.8 | 5.5  | 23.4  |
| PHF2      | 10 | 18.7 | 2.7  | 16.0 | -13.3 |
| RPS26     | 2  | 16.6 | 5.3  | 11.2 | -5.9  |
| PSAP      | 3  | 10.8 | 3.8  | 7.0  | -3.2  |
| S100A10   | 0  | 8.6  | 3.8  | 4.8  | -1.0  |
| RPL37A    | 6  | 14.9 | 4.3  | 10.6 | -6.3  |
| MCMBP     | 7  | 15.0 | 1.5  | 13.5 | -12.1 |
| TAF13     | 1  | 28.8 | 25.4 | 3.5  | 21.9  |
| ZNF780A   | 4  | 6.7  | 1.7  | 4.9  | -3.2  |
| ATAD3A    | 2  | 23.2 | 10.5 | 12.7 | -2.2  |
| FAM118B   | 0  | 11.7 | 5.4  | 6.3  | -0.8  |
| SLC9A8    | 2  | 23.0 | 9.8  | 13.2 | -3.3  |
| OCLN      | 4  | 12.5 | 4.4  | 8.1  | -3.7  |
| GPA1      | 13 | 15.9 | 2.2  | 13.7 | -11.5 |
| MYO1C     | 3  | 7.6  | 2.4  | 5.2  | -2.8  |
| NKIRAS1   | 1  | 12.5 | 8.1  | 4.4  | 3.6   |
| KIF13B    | 4  | 15.6 | 4.6  | 10.9 | -6.3  |
| ADH5      | 4  | 8.4  | 2.1  | 6.3  | -4.2  |
| HIST1H2BK | 0  | 7.1  | 3.7  | 3.4  | 0.3   |
| TEAD4     | 0  | 11.6 | 4.3  | 7.3  | -3.0  |
| SPG7      | 0  | 8.1  | 4.1  | 4.0  | 0.0   |
| ERO1A     | 1  | 15.1 | 12.0 | 3.0  | 9.0   |
| S100A6    | 3  | 11.5 | 5.9  | 5.5  | 0.4   |
| RPL12     | 10 | 14.1 | 1.7  | 12.4 | -10.6 |
| ZNF121    | 1  | 13.5 | 9.0  | 4.5  | 4.5   |
| MPZL1     | 0  | 7.1  | 2.8  | 4.3  | -1.5  |
| VPS13A    | 1  | 23.1 | 20.1 | 3.0  | 17.1  |
| MBP       | 0  | 10.7 | 4.5  | 6.2  | -1.7  |
| AKAP17A   | 0  | 7.6  | 3.3  | 4.3  | -1.1  |
| ELOVL2    | 0  | 8.1  | 2.4  | 5.8  | -3.4  |
| C1orf122  | 2  | 21.9 | 9.4  | 12.5 | -3.1  |
| NOL8      | 1  | 53.8 | 47.9 | 5.9  | 42.0  |
| IRAK4     | 1  | 9.8  | 6.7  | 3.1  | 3.6   |
| MRPL42    | 1  | 62.1 | 55.7 | 6.4  | 49.3  |
| ENTPD7    | 0  | 8.3  | 4.1  | 4.2  | -0.1  |
| ZNF335    | 2  | 32.3 | 16.4 | 15.9 | 0.5   |
| RPS4X     | 6  | 12.6 | 2.2  | 10.5 | -8.3  |

|          |   |      |      |      |       |
|----------|---|------|------|------|-------|
| ZNF84    | 1 | 26.5 | 23.5 | 3.0  | 20.5  |
| MAK16    | 1 | 14.8 | 8.9  | 5.9  | 2.9   |
| SIRPA    | 0 | 7.6  | 3.0  | 4.7  | -1.7  |
| GRK6     | 0 | 12.8 | 5.4  | 7.4  | -2.0  |
| PRIM1    | 5 | 16.5 | 4.3  | 12.1 | -7.8  |
| 5-Mar    | 1 | 13.4 | 8.1  | 5.4  | 2.7   |
| AKR1B10  | 4 | 16.3 | 4.5  | 11.8 | -7.4  |
| ZBTB14   | 0 | 8.4  | 3.1  | 5.3  | -2.2  |
| CD2AP    | 1 | 30.2 | 26.4 | 3.8  | 22.6  |
| SFI1     | 0 | 6.4  | 2.5  | 3.8  | -1.3  |
| ZNF248   | 1 | 12.6 | 9.3  | 3.4  | 5.9   |
| HIBCH    | 1 | 29.2 | 22.4 | 6.8  | 15.6  |
| ZNF544   | 0 | 5.4  | 2.4  | 3.0  | -0.6  |
| SOWAHC   | 0 | 10.1 | 3.1  | 7.1  | -4.0  |
| ZNF770   | 1 | 39.1 | 34.9 | 4.2  | 30.7  |
| HMG5     | 0 | 6.4  | 2.3  | 4.2  | -1.9  |
| MIER1    | 1 | 36.8 | 33.4 | 3.3  | 30.1  |
| MAN1A2   | 1 | 30.8 | 27.4 | 3.4  | 24.0  |
| SVIP     | 1 | 11.8 | 6.0  | 5.8  | 0.3   |
| ZNF251   | 0 | 8.6  | 4.1  | 4.4  | -0.3  |
| DDR1     | 0 | 10.8 | 3.5  | 7.3  | -3.8  |
| TFDP1    | 0 | 8.1  | 3.4  | 4.7  | -1.3  |
| HSD17B11 | 1 | 20.1 | 16.5 | 3.6  | 12.9  |
| SZT2     | 2 | 27.4 | 10.4 | 16.9 | -6.5  |
| SULT1C2  | 0 | 10.7 | 4.4  | 6.3  | -1.8  |
| QRICH1   | 1 | 39.9 | 29.1 | 10.8 | 18.3  |
| DDX42    | 1 | 86.9 | 82.4 | 4.5  | 77.9  |
| RPL23A   | 1 | 12.9 | 8.0  | 4.9  | 3.2   |
| SLC29A3  | 4 | 20.8 | 8.6  | 12.2 | -3.6  |
| STYX     | 1 | 19.6 | 14.6 | 5.0  | 9.6   |
| UBL5     | 8 | 16.5 | 6.2  | 10.3 | -4.1  |
| HELZ     | 1 | 12.9 | 9.2  | 3.7  | 5.5   |
| TMEM116  | 0 | 6.6  | 2.5  | 4.0  | -1.5  |
| UCKL1    | 2 | 17.9 | 6.3  | 11.7 | -5.4  |
| SDAD1    | 1 | 68.9 | 59.3 | 9.5  | 49.8  |
| ZKSCAN8  | 1 | 20.5 | 14.8 | 5.7  | 9.1   |
| FAM109A  | 4 | 26.6 | 7.9  | 18.7 | -10.8 |
| PIM3     | 2 | 21.4 | 10.4 | 11.0 | -0.5  |
| ASNA1    | 8 | 17.7 | 5.0  | 12.8 | -7.8  |
| ASPH     | 0 | 9.7  | 2.9  | 6.8  | -3.9  |
| SPRED2   | 0 | 10.8 | 4.9  | 5.8  | -0.9  |
| WWP2     | 2 | 15.1 | 6.1  | 9.0  | -2.9  |
| GFPT1    | 1 | 23.6 | 18.9 | 4.7  | 14.1  |
| UVRAG    | 0 | 8.4  | 2.9  | 5.4  | -2.5  |
| ITSN2    | 1 | 20.6 | 17.7 | 2.9  | 14.8  |
| MGEA5    | 1 | 58.1 | 52.8 | 5.2  | 47.6  |
| TCAF1    | 1 | 9.8  | 6.0  | 3.7  | 2.3   |
| TXNRD1   | 1 | 12.3 | 7.6  | 4.6  | 3.0   |
| ZNF480   | 0 | 5.8  | 2.2  | 3.6  | -1.4  |
| ZNF587   | 0 | 10.0 | 5.5  | 4.5  | 1.0   |
| TPM2     | 0 | 8.6  | 4.0  | 4.6  | -0.6  |
| YTHDF2   | 1 | 9.3  | 6.3  | 3.0  | 3.3   |
| TMA16    | 1 | 25.2 | 20.6 | 4.6  | 16.0  |
| MAFK     | 0 | 10.4 | 4.2  | 6.2  | -2.0  |



|           |   |      |      |      |       |
|-----------|---|------|------|------|-------|
| GPN1      | 0 | 6.9  | 2.7  | 4.2  | -1.4  |
| ZNF28     | 0 | 6.1  | 2.7  | 3.3  | -0.6  |
| ZNF511    | 0 | 14.5 | 5.8  | 8.6  | -2.8  |
| WDHD1     | 7 | 36.6 | 5.8  | 30.8 | -24.9 |
| ZNF789    | 0 | 4.7  | 2.0  | 2.7  | -0.6  |
| CTNND1    | 0 | 7.6  | 3.3  | 4.3  | -1.0  |
| DDX39B    | 6 | 17.5 | 7.5  | 9.9  | -2.4  |
| NUDT16    | 2 | 17.6 | 6.1  | 11.5 | -5.5  |
| TLK1      | 1 | 26.4 | 23.3 | 3.0  | 20.3  |
| LRBA      | 1 | 10.9 | 7.4  | 3.5  | 3.9   |
| BAZ1A     | 1 | 32.5 | 27.4 | 5.2  | 22.2  |
| COPS8     | 1 | 14.0 | 7.3  | 6.7  | 0.6   |
| MDM4      | 1 | 12.7 | 8.4  | 4.3  | 4.1   |
| KLHL9     | 0 | 8.3  | 2.7  | 5.6  | -2.8  |
| NCOA6     | 0 | 9.5  | 4.7  | 4.8  | -0.1  |
| STK39     | 0 | 5.7  | 2.3  | 3.5  | -1.2  |
| C6orf89   | 0 | 20.5 | 8.6  | 11.9 | -3.3  |
| CALM1     | 1 | 15.5 | 11.3 | 4.2  | 7.1   |
| TTC37     | 1 | 73.1 | 68.6 | 4.6  | 64.0  |
| PAPSS2    | 0 | 5.8  | 2.2  | 3.5  | -1.3  |
| SLC9A6    | 0 | 7.8  | 3.6  | 4.3  | -0.7  |
| FAN1      | 1 | 12.3 | 8.7  | 3.7  | 5.0   |
| MT-ND6    | 0 | 5.3  | 2.3  | 3.0  | -0.8  |
| IPO9      | 6 | 15.8 | 2.6  | 13.2 | -10.6 |
| MT-CO2    | 0 | 9.0  | 3.3  | 5.7  | -2.4  |
| GLMP      | 0 | 12.9 | 5.0  | 7.9  | -2.9  |
| ANKRD13B  | 2 | 14.4 | 6.2  | 8.2  | -2.0  |
| ECI2      | 0 | 7.8  | 3.0  | 4.8  | -1.9  |
| UNC13B    | 2 | 14.5 | 4.1  | 10.4 | -6.3  |
| MT-CYB    | 0 | 6.6  | 3.3  | 3.3  | 0.1   |
| LDB1      | 0 | 14.4 | 7.2  | 7.3  | -0.1  |
| CTR9      | 1 | 53.1 | 47.7 | 5.4  | 42.2  |
| MSRB1     | 4 | 15.2 | 6.9  | 8.2  | -1.3  |
| ZNF652    | 1 | 12.8 | 7.2  | 5.6  | 1.6   |
| SMURF1    | 0 | 9.0  | 3.9  | 5.1  | -1.2  |
| GPATCH3   | 2 | 28.5 | 13.0 | 15.6 | -2.6  |
| CDC42BPB  | 0 | 9.8  | 4.6  | 5.1  | -0.5  |
| RPL10A    | 0 | 15.4 | 7.1  | 8.3  | -1.2  |
| EPS8L3    | 4 | 24.9 | 15.2 | 9.7  | 5.4   |
| MT-ND2    | 0 | 7.1  | 3.2  | 3.8  | -0.6  |
| ZNF830    | 0 | 7.9  | 2.6  | 5.3  | -2.8  |
| MT-ND5    | 0 | 7.9  | 3.9  | 4.0  | -0.1  |
| CNOT7     | 1 | 33.0 | 24.7 | 8.3  | 16.4  |
| TMEM184B  | 3 | 15.6 | 5.3  | 10.3 | -5.0  |
| MTOR      | 0 | 9.4  | 4.6  | 4.9  | -0.3  |
| SCAMP5    | 2 | 15.5 | 5.4  | 10.1 | -4.7  |
| MT-CO1    | 0 | 5.6  | 2.5  | 3.1  | -0.6  |
| PNP       | 0 | 10.9 | 3.8  | 7.1  | -3.3  |
| GK        | 4 | 12.8 | 4.7  | 8.1  | -3.4  |
| FOXJ3     | 0 | 8.3  | 3.1  | 5.2  | -2.1  |
| ZNF358    | 8 | 26.4 | 4.2  | 22.2 | -18.0 |
| SFT2D1    | 1 | 8.3  | 4.1  | 4.1  | 0.0   |
| CHAMP1    | 0 | 8.0  | 3.9  | 4.1  | -0.2  |
| ARHGAP11A | 7 | 48.5 | 7.5  | 41.0 | -33.5 |

|          |    |      |      |      |       |
|----------|----|------|------|------|-------|
| HMG2     | 5  | 10.9 | 1.9  | 8.9  | -7.0  |
| SELM     | 0  | 6.4  | 2.4  | 4.0  | -1.6  |
| UBE2J1   | 1  | 11.8 | 8.4  | 3.4  | 4.9   |
| OPA1     | 1  | 88.9 | 81.0 | 7.9  | 73.2  |
| DENND4B  | 9  | 13.0 | 4.4  | 8.6  | -4.3  |
| ZNF277   | 1  | 22.1 | 18.5 | 3.5  | 15.0  |
| MT-ND3   | 0  | 7.2  | 2.9  | 4.3  | -1.4  |
| KTI12    | 2  | 24.1 | 11.5 | 12.5 | -1.0  |
| SELT     | 1  | 10.8 | 7.6  | 3.2  | 4.4   |
| CES1     | 4  | 10.9 | 3.3  | 7.6  | -4.3  |
| RUSC2    | 3  | 15.0 | 5.0  | 10.0 | -5.0  |
| OSTC     | 1  | 17.9 | 13.4 | 4.4  | 9.0   |
| R3HDM4   | 8  | 20.7 | 6.8  | 14.0 | -7.2  |
| TSEN15   | 7  | 10.6 | 1.2  | 9.4  | -8.2  |
| LTN1     | 1  | 30.3 | 26.7 | 3.6  | 23.1  |
| RUNDC1   | 2  | 24.3 | 9.0  | 15.3 | -6.3  |
| GRK5     | 0  | 9.4  | 4.3  | 5.0  | -0.7  |
| TYW1     | 6  | 31.7 | 7.4  | 24.3 | -17.0 |
| DCAF12   | 0  | 11.9 | 4.9  | 7.1  | -2.2  |
| MT-ND4   | 6  | 11.4 | 3.7  | 7.7  | -4.0  |
| SMC5     | 1  | 24.9 | 21.2 | 3.7  | 17.5  |
| MT-ND1   | 0  | 6.2  | 2.9  | 3.3  | -0.4  |
| PRMT6    | 0  | 6.8  | 3.1  | 3.7  | -0.6  |
| SHISA4   | 3  | 19.9 | 8.7  | 11.2 | -2.4  |
| CAPZA2   | 1  | 76.0 | 71.0 | 5.0  | 66.1  |
| MT-ATP6  | 6  | 9.6  | 3.1  | 6.5  | -3.4  |
| TOP1     | 1  | 39.7 | 35.6 | 4.1  | 31.5  |
| PRC1     | 5  | 27.6 | 13.7 | 13.8 | -0.1  |
| MAP3K3   | 0  | 10.2 | 4.9  | 5.4  | -0.5  |
| SREBF2   | 0  | 9.6  | 4.9  | 4.8  | 0.1   |
| C1orf174 | 0  | 12.6 | 5.0  | 7.6  | -2.6  |
| C9orf114 | 10 | 17.3 | 2.5  | 14.9 | -12.4 |
| RPL39    | 0  | 8.1  | 4.2  | 3.8  | 0.4   |
| KIAA0753 | 1  | 11.3 | 7.6  | 3.7  | 4.0   |
| DCLRE1A  | 1  | 21.8 | 14.5 | 7.3  | 7.2   |
| ATG9A    | 0  | 7.1  | 3.6  | 3.4  | 0.2   |
| APRT     | 2  | 18.3 | 7.5  | 10.8 | -3.2  |
| CCDC167  | 2  | 15.3 | 5.0  | 10.3 | -5.3  |
| MT-CO3   | 0  | 7.1  | 2.5  | 4.6  | -2.1  |
| NAGA     | 0  | 14.9 | 6.2  | 8.6  | -2.4  |
| SMG5     | 9  | 20.8 | 4.0  | 16.8 | -12.8 |
| KIF1BP   | 7  | 14.6 | 1.3  | 13.3 | -12.1 |
| TGM2     | 0  | 10.0 | 4.2  | 5.8  | -1.5  |
| ARMCX6   | 0  | 6.9  | 4.0  | 2.9  | 1.1   |
| PJA2     | 1  | 46.7 | 42.5 | 4.2  | 38.2  |
| SGMS1    | 0  | 5.5  | 2.3  | 3.2  | -0.9  |
| INF2     | 2  | 14.2 | 3.9  | 10.3 | -6.4  |
| EFCAB2   | 1  | 5.9  | 3.3  | 2.6  | 0.7   |
| COX20    | 6  | 21.0 | 4.2  | 16.8 | -12.6 |
| CHML     | 1  | 18.7 | 13.6 | 5.1  | 8.5   |
| TATDN3   | 0  | 6.4  | 2.1  | 4.3  | -2.2  |
| C1orf53  | 0  | 8.9  | 3.6  | 5.3  | -1.7  |
| CENPW    | 5  | 24.3 | 9.0  | 15.4 | -6.4  |
| FAM229B  | 3  | 10.9 | 3.9  | 6.9  | -3.0  |

|           |    |      |      |      |       |
|-----------|----|------|------|------|-------|
| METTL10   | 7  | 25.3 | 3.1  | 22.2 | -19.1 |
| GDI1      | 3  | 20.0 | 10.6 | 9.4  | 1.3   |
| PCMTD2    | 1  | 37.8 | 33.7 | 4.2  | 29.5  |
| LIME1     | 2  | 18.1 | 7.0  | 11.0 | -4.0  |
| FAM127B   | 3  | 8.1  | 2.0  | 6.1  | -4.1  |
| SYS1      | 2  | 19.5 | 6.4  | 13.1 | -6.7  |
| TRAF3IP1  | 1  | 6.8  | 3.5  | 3.3  | 0.2   |
| GIGYF2    | 1  | 28.1 | 23.8 | 4.3  | 19.5  |
| C2orf72   | 4  | 36.1 | 22.6 | 13.4 | 9.2   |
| RUFY2     | 6  | 57.3 | 8.6  | 48.7 | -40.1 |
| PHACTR4   | 0  | 8.0  | 3.7  | 4.2  | -0.5  |
| AGAP6     | 0  | 9.1  | 4.1  | 5.0  | -1.0  |
| TIMM23B   | 0  | 11.3 | 4.8  | 6.5  | -1.7  |
| ZDHHC18   | 0  | 10.5 | 4.6  | 5.8  | -1.2  |
| TMEM57    | 0  | 6.8  | 2.9  | 3.8  | -0.9  |
| DAXX      | 0  | 9.6  | 4.3  | 5.3  | -1.0  |
| BMPR2     | 1  | 19.2 | 13.5 | 5.7  | 7.8   |
| TCEA3     | 0  | 6.2  | 2.5  | 3.6  | -1.1  |
| PFDN6     | 0  | 10.6 | 4.3  | 6.3  | -2.0  |
| RING1     | 2  | 21.8 | 7.9  | 13.9 | -6.0  |
| HSD17B8   | 2  | 32.5 | 16.9 | 15.6 | 1.3   |
| RXRB      | 8  | 22.2 | 2.6  | 19.6 | -17.0 |
| OXLD1     | 2  | 18.7 | 7.8  | 11.0 | -3.2  |
| BRD2      | 1  | 7.9  | 4.4  | 3.5  | 0.9   |
| HLA-DMA   | 0  | 10.5 | 4.8  | 5.7  | -0.9  |
| COL5A2    | 0  | 6.2  | 2.4  | 3.8  | -1.4  |
| PSMB8     | 3  | 22.4 | 11.2 | 11.3 | -0.1  |
| TAP2      | 0  | 11.3 | 4.2  | 7.1  | -2.9  |
| LINC01420 | 1  | 9.8  | 5.3  | 4.5  | 0.8   |
| PBX2      | 0  | 12.1 | 6.1  | 6.0  | 0.1   |
| RNF5      | 2  | 18.0 | 5.8  | 12.2 | -6.4  |
| AGPAT1    | 11 | 18.9 | 1.5  | 17.4 | -15.9 |
| FKBPL     | 2  | 41.0 | 21.2 | 19.9 | 1.3   |
| MRPL38    | 6  | 12.2 | 2.5  | 9.7  | -7.2  |
| STK19     | 0  | 13.4 | 6.3  | 7.0  | -0.7  |
| DXO       | 0  | 15.3 | 6.5  | 8.8  | -2.4  |
| SKIV2L    | 0  | 9.6  | 4.6  | 5.0  | -0.5  |
| NELFE     | 2  | 20.1 | 6.4  | 13.7 | -7.3  |
| ZBTB12    | 2  | 15.4 | 5.7  | 9.7  | -4.0  |
| SDHD      | 1  | 15.8 | 11.3 | 4.5  | 6.8   |
| EHMT2     | 2  | 19.1 | 7.6  | 11.5 | -3.9  |
| NEU1      | 4  | 13.5 | 3.9  | 9.6  | -5.6  |
| C6orf48   | 0  | 11.2 | 5.4  | 5.7  | -0.3  |
| HSPA1B    | 0  | 9.5  | 3.5  | 6.0  | -2.5  |
| HSPA1A    | 0  | 9.7  | 4.5  | 5.1  | -0.6  |
| LSM2      | 5  | 19.9 | 5.9  | 14.1 | -8.2  |
| VARS      | 0  | 12.5 | 4.8  | 7.8  | -3.0  |
| MBD5      | 0  | 6.3  | 2.7  | 3.6  | -0.8  |
| MSH5      | 0  | 6.0  | 2.6  | 3.5  | -0.9  |
| ABHD16A   | 11 | 18.9 | 1.6  | 17.3 | -15.6 |
| CSNK2B    | 11 | 16.6 | 1.8  | 14.8 | -13.1 |
| GPANK1    | 11 | 27.0 | 2.1  | 24.9 | -22.8 |
| C6orf47   | 2  | 26.8 | 10.9 | 15.9 | -5.0  |
| APOM      | 4  | 24.7 | 13.9 | 10.8 | 3.1   |

|          |    |       |      |      |       |
|----------|----|-------|------|------|-------|
| BAG6     | 0  | 11.0  | 4.7  | 6.3  | -1.6  |
| PRRC2A   | 0  | 18.8  | 7.1  | 11.7 | -4.6  |
| NFKBIL1  | 11 | 39.7  | 3.3  | 36.4 | -33.1 |
| MICB     | 0  | 10.0  | 4.0  | 6.0  | -2.0  |
| MICA     | 0  | 9.5   | 4.0  | 5.5  | -1.5  |
| HLA-C    | 3  | 11.3  | 4.7  | 6.6  | -1.9  |
| CCHCR1   | 0  | 17.2  | 6.0  | 11.2 | -5.2  |
| DHX16    | 0  | 12.7  | 5.2  | 7.5  | -2.4  |
| C6orf136 | 0  | 9.6   | 3.8  | 5.8  | -2.1  |
| MRPS18B  | 2  | 19.4  | 7.3  | 12.1 | -4.7  |
| PPP1R10  | 0  | 14.2  | 6.8  | 7.5  | -0.7  |
| ABCF1    | 0  | 9.8   | 4.3  | 5.4  | -1.1  |
| PRR3     | 0  | 13.6  | 7.0  | 6.6  | 0.4   |
| DDR1     | 3  | 8.2   | 2.5  | 5.7  | -3.2  |
| GNL1     | 0  | 8.0   | 4.2  | 3.8  | 0.4   |
| HLA-E    | 3  | 18.3  | 7.2  | 11.1 | -4.0  |
| TRIM39   | 11 | 21.0  | 1.9  | 19.1 | -17.3 |
| ZNF468   | 0  | 5.7   | 2.0  | 3.6  | -1.6  |
| PPP1R11  | 0  | 17.7  | 6.8  | 10.9 | -4.2  |
| GNB2L1   | 6  | 12.1  | 1.8  | 10.2 | -8.4  |
| TBC1D8   | 4  | 7.1   | 2.2  | 4.9  | -2.7  |
| HLA-F    | 3  | 12.0  | 3.8  | 8.2  | -4.4  |
| AKT1S1   | 2  | 19.1  | 7.7  | 11.4 | -3.7  |
| TRIM27   | 2  | 21.6  | 9.0  | 12.6 | -3.6  |
| MRPL53   | 6  | 9.6   | 1.5  | 8.1  | -6.7  |
| ATXN2    | 1  | 16.0  | 11.5 | 4.5  | 7.1   |
| DCTN1    | 0  | 10.3  | 4.8  | 5.5  | -0.7  |
| TCTN1    | 0  | 7.4   | 2.6  | 4.9  | -2.3  |
| FAM216A  | 0  | 12.2  | 3.5  | 8.6  | -5.1  |
| ZBTB48   | 0  | 10.8  | 5.1  | 5.7  | -0.6  |
| MZT1     | 7  | 23.3  | 3.5  | 19.8 | -16.3 |
| UQCC3    | 2  | 33.2  | 16.9 | 16.3 | 0.6   |
| C12orf73 | 0  | 15.6  | 5.8  | 9.8  | -4.1  |
| TRIM13   | 0  | 6.8   | 3.1  | 3.7  | -0.7  |
| SPIRE2   | 12 | 28.3  | 2.0  | 26.3 | -24.2 |
| SLC35B4  | 0  | 8.2   | 3.6  | 4.6  | -1.0  |
| TRIQQ    | 1  | 10.1  | 7.7  | 2.4  | 5.4   |
| SDHAF1   | 2  | 40.7  | 20.5 | 20.2 | 0.3   |
| PSENN    | 0  | 8.4   | 4.0  | 4.4  | -0.3  |
| C4orf46  | 7  | 14.0  | 2.2  | 11.8 | -9.5  |
| LGR4     | 1  | 10.3  | 5.8  | 4.5  | 1.3   |
| PSMB10   | 2  | 13.1  | 4.6  | 8.5  | -3.9  |
| E2F4     | 2  | 16.5  | 6.0  | 10.5 | -4.6  |
| PDE7A    | 1  | 7.6   | 4.5  | 3.1  | 1.4   |
| SNX2     | 1  | 105.0 | 92.8 | 12.2 | 80.6  |
| SARNP    | 1  | 30.9  | 25.3 | 5.6  | 19.7  |
| ADGRG1   | 3  | 8.4   | 3.6  | 4.9  | -1.3  |
| IPO7     | 1  | 105.4 | 97.9 | 7.4  | 90.5  |
| PRR13    | 0  | 12.6  | 3.9  | 8.7  | -4.7  |
| TECPR1   | 0  | 10.5  | 5.0  | 5.6  | -0.6  |
| MT1A     | 3  | 11.1  | 4.0  | 7.1  | -3.2  |
| CFI      | 4  | 10.8  | 4.2  | 6.6  | -2.4  |
| CNEP1R1  | 1  | 11.1  | 6.5  | 4.5  | 2.0   |
| KRT81    | 3  | 13.8  | 7.7  | 6.1  | 1.6   |

|          |    |      |      |      |       |
|----------|----|------|------|------|-------|
| CCDC85C  | 2  | 19.6 | 7.8  | 11.8 | -4.1  |
| RGL3     | 0  | 6.4  | 2.6  | 3.8  | -1.2  |
| NAP1L4   | 1  | 41.8 | 31.5 | 10.4 | 21.1  |
| TMSB4X   | 3  | 10.2 | 4.1  | 6.1  | -2.0  |
| TMEM256  | 0  | 12.4 | 4.7  | 7.7  | -3.0  |
| CPT1B    | 0  | 5.1  | 2.1  | 3.0  | -0.9  |
| HMG1     | 1  | 23.0 | 18.7 | 4.3  | 14.4  |
| LCMT1    | 6  | 8.5  | 1.4  | 7.1  | -5.6  |
| CDPF1    | 2  | 17.5 | 6.4  | 11.1 | -4.7  |
| LIN52    | 0  | 7.6  | 2.1  | 5.5  | -3.5  |
| LYRM5    | 1  | 12.1 | 9.1  | 3.0  | 6.0   |
| ITSN1    | 1  | 9.4  | 5.9  | 3.5  | 2.4   |
| ITPRIPL2 | 0  | 8.4  | 3.9  | 4.4  | -0.5  |
| DENND1C  | 4  | 21.7 | 9.1  | 12.6 | -3.6  |
| CRYZL1   | 6  | 22.5 | 3.1  | 19.4 | -16.4 |
| C5orf51  | 1  | 24.4 | 20.4 | 4.0  | 16.4  |
| ZNF316   | 0  | 11.2 | 5.5  | 5.7  | -0.2  |
| CEMP1    | 12 | 17.1 | 1.6  | 15.5 | -13.9 |
| RNPS1    | 0  | 8.7  | 2.8  | 5.9  | -3.2  |
| DNAJC19  | 0  | 14.2 | 3.9  | 10.2 | -6.3  |
| HN1L     | 5  | 12.9 | 5.3  | 7.6  | -2.2  |
| RAB12    | 0  | 6.5  | 2.3  | 4.2  | -1.9  |
| HLA-A    | 3  | 13.2 | 4.2  | 9.0  | -4.8  |
| HACD2    | 1  | 17.2 | 12.4 | 4.8  | 7.6   |
| ANKRD28  | 1  | 35.4 | 27.9 | 7.5  | 20.4  |
| METTL6   | 0  | 6.8  | 3.6  | 3.3  | 0.3   |
| GPX3     | 4  | 10.1 | 2.5  | 7.5  | -5.0  |
| C11orf31 | 2  | 10.1 | 3.4  | 6.7  | -3.3  |
| STK38L   | 1  | 21.1 | 17.8 | 3.3  | 14.6  |
| SACM1L   | 1  | 44.0 | 39.9 | 4.1  | 35.8  |
| TSN      | 1  | 39.4 | 32.5 | 6.9  | 25.6  |
| SLC48A1  | 0  | 12.2 | 4.3  | 7.8  | -3.5  |
| MT-ND4L  | 1  | 11.9 | 5.7  | 6.2  | -0.5  |
| ZNF580   | 2  | 15.3 | 5.2  | 10.1 | -4.8  |
| NUP62    | 0  | 14.4 | 6.9  | 7.5  | -0.6  |
| SFT2D2   | 9  | 9.2  | 1.4  | 7.8  | -6.4  |
| FGFR10P  | 1  | 20.3 | 14.4 | 5.9  | 8.5   |
| SCAF8    | 1  | 11.9 | 8.3  | 3.7  | 4.6   |
| TCTEX1D2 | 0  | 4.6  | 2.0  | 2.5  | -0.5  |
| CRIP1    | 0  | 5.1  | 2.1  | 3.0  | -0.9  |
| KLHL23   | 1  | 17.0 | 10.4 | 6.6  | 3.8   |
| FAM24B   | 0  | 9.2  | 4.0  | 5.2  | -1.2  |
| TRIM59   | 7  | 36.2 | 5.4  | 30.8 | -25.3 |
| MLLT11   | 3  | 6.6  | 2.1  | 4.6  | -2.5  |
| DNLZ     | 2  | 16.3 | 6.8  | 9.5  | -2.6  |
| SUPT4H1  | 0  | 6.8  | 2.6  | 4.3  | -1.7  |
| NRAS     | 1  | 53.6 | 46.9 | 6.7  | 40.3  |
| ANKRD39  | 2  | 26.0 | 12.1 | 13.9 | -1.8  |
| QTRT1    | 8  | 20.8 | 6.1  | 14.7 | -8.6  |
| CHUK     | 1  | 44.8 | 37.8 | 7.1  | 30.7  |
| MXD3     | 0  | 13.9 | 4.9  | 9.0  | -4.1  |
| COG8     | 2  | 28.6 | 13.8 | 14.8 | -1.0  |
| ARHGAP19 | 0  | 14.3 | 4.7  | 9.6  | -4.9  |
| HAUS7    | 0  | 10.4 | 4.7  | 5.6  | -0.9  |

|         |    |      |      |      |       |
|---------|----|------|------|------|-------|
| LCAT    | 0  | 12.2 | 6.3  | 5.9  | 0.5   |
| SIPA1   | 0  | 11.7 | 4.7  | 7.0  | -2.3  |
| SYNJ2BP | 0  | 9.6  | 2.9  | 6.7  | -3.8  |
| ARL2    | 0  | 7.0  | 3.2  | 3.8  | -0.6  |
| RBMXL1  | 1  | 13.1 | 9.3  | 3.8  | 5.5   |
| SRA1    | 6  | 9.8  | 1.3  | 8.5  | -7.1  |
| TMEM110 | 0  | 8.8  | 4.2  | 4.6  | -0.3  |
| DNAJC9  | 5  | 16.5 | 4.5  | 12.0 | -7.4  |
| C8orf82 | 2  | 41.6 | 22.0 | 19.6 | 2.4   |
| VDAC1   | 1  | 12.2 | 6.5  | 5.7  | 0.8   |
| ZBTB9   | 11 | 28.6 | 2.3  | 26.3 | -24.0 |
| TMX2    | 0  | 13.7 | 4.5  | 9.2  | -4.7  |
| HEXA    | 0  | 9.6  | 4.7  | 5.0  | -0.3  |
| NDUFS3  | 0  | 14.1 | 5.0  | 9.1  | -4.1  |
| LEPROT  | 1  | 33.0 | 26.3 | 6.7  | 19.6  |
| LBH     | 3  | 9.2  | 3.2  | 6.0  | -2.8  |
| PPP1CB  | 1  | 96.2 | 91.9 | 4.3  | 87.6  |
| NCKIPSD | 0  | 11.9 | 4.9  | 7.0  | -2.0  |
| ATF6B   | 0  | 8.7  | 4.2  | 4.5  | -0.2  |
| TREX1   | 0  | 10.9 | 4.6  | 6.3  | -1.7  |
| SLC35F6 | 0  | 16.7 | 6.5  | 10.2 | -3.7  |
| CLIC1   | 0  | 13.5 | 5.1  | 8.4  | -3.3  |
| DDAH2   | 0  | 6.3  | 3.2  | 3.2  | 0.0   |
| RPS29   | 0  | 10.4 | 3.5  | 7.0  | -3.5  |
| ZNF134  | 0  | 7.3  | 3.6  | 3.6  | 0.0   |
| GTF2H4  | 2  | 19.0 | 7.1  | 11.9 | -4.8  |
| DDX47   | 7  | 8.8  | 1.1  | 7.7  | -6.7  |
| EMP2    | 0  | 7.8  | 3.7  | 4.2  | -0.5  |
| UBD     | 4  | 14.6 | 6.1  | 8.5  | -2.4  |
| DNASE1  | 0  | 6.4  | 3.0  | 3.4  | -0.4  |
| MDP1    | 0  | 12.6 | 5.5  | 7.1  | -1.7  |
| CSNK1E  | 3  | 14.9 | 5.3  | 9.6  | -4.4  |
| IRF9    | 0  | 8.3  | 4.0  | 4.3  | -0.3  |
| GALT    | 4  | 18.1 | 5.3  | 12.8 | -7.6  |
| ITGA1   | 1  | 10.5 | 7.0  | 3.6  | 3.4   |
| NUDT19  | 0  | 8.7  | 3.4  | 5.3  | -1.9  |
| TAX1BP3 | 0  | 8.0  | 3.1  | 4.9  | -1.8  |
| AP1G2   | 0  | 6.7  | 2.4  | 4.3  | -1.8  |
| CARKD   | 0  | 11.4 | 4.9  | 6.5  | -1.6  |
| GANC    | 1  | 8.7  | 5.4  | 3.3  | 2.0   |
| TTLL3   | 0  | 7.2  | 4.0  | 3.3  | 0.7   |
| REPIN1  | 0  | 13.5 | 4.6  | 8.9  | -4.3  |
| MRPL23  | 8  | 17.1 | 3.1  | 14.0 | -10.9 |
| SMIM7   | 8  | 12.4 | 3.3  | 9.0  | -5.7  |
| TSPAN4  | 3  | 14.5 | 8.2  | 6.3  | 1.9   |
| CPNE1   | 0  | 11.3 | 4.1  | 7.1  | -3.0  |
| ARL16   | 0  | 10.3 | 4.6  | 5.7  | -1.0  |
| LYRM4   | 2  | 14.5 | 5.0  | 9.5  | -4.5  |
| MYCBP   | 6  | 27.0 | 6.0  | 21.0 | -15.0 |
| ALG3    | 4  | 17.7 | 4.6  | 13.2 | -8.6  |
| FIS1    | 2  | 15.9 | 6.2  | 9.7  | -3.5  |
| ANG     | 4  | 17.3 | 8.6  | 8.6  | 0.0   |
| HAUS3   | 7  | 25.9 | 3.6  | 22.4 | -18.8 |
| BBIP1   | 1  | 20.2 | 13.9 | 6.3  | 7.5   |

|           |    |       |      |      |       |
|-----------|----|-------|------|------|-------|
| AS3MT     | 4  | 9.2   | 2.2  | 6.9  | -4.7  |
| PPME1     | 0  | 9.9   | 4.5  | 5.4  | -0.9  |
| STARD10   | 4  | 13.5  | 6.1  | 7.4  | -1.3  |
| ZSWIM8    | 0  | 8.8   | 4.2  | 4.5  | -0.3  |
| IFRD2     | 0  | 19.0  | 7.8  | 11.3 | -3.5  |
| ZBED1     | 0  | 12.3  | 4.5  | 7.8  | -3.3  |
| TOMM6     | 0  | 15.5  | 5.2  | 10.3 | -5.1  |
| HNRNPUL2  | 0  | 9.4   | 3.9  | 5.5  | -1.6  |
| METTL12   | 2  | 20.6  | 8.2  | 12.3 | -4.1  |
| MTCP1     | 6  | 23.5  | 5.1  | 18.4 | -13.3 |
| ZSWIM7    | 0  | 9.9   | 4.9  | 4.9  | 0.0   |
| ARHGEF28  | 0  | 9.6   | 2.3  | 7.3  | -5.0  |
| C22orf29  | 0  | 12.4  | 5.1  | 7.2  | -2.1  |
| PHB2      | 0  | 11.6  | 5.1  | 6.5  | -1.4  |
| NEURL4    | 2  | 18.4  | 5.6  | 12.7 | -7.1  |
| UBXN2B    | 1  | 10.8  | 8.4  | 2.5  | 5.9   |
| MSMP      | 0  | 5.6   | 2.6  | 3.0  | -0.5  |
| PEX26     | 0  | 18.5  | 7.0  | 11.5 | -4.5  |
| FASTKD5   | 0  | 14.5  | 4.8  | 9.6  | -4.8  |
| GOLGA8B   | 1  | 10.0  | 5.5  | 4.5  | 1.0   |
| HOMEZ     | 0  | 10.7  | 3.8  | 6.9  | -3.1  |
| DDX3X     | 1  | 102.6 | 98.0 | 4.6  | 93.4  |
| VPS16     | 2  | 13.5  | 4.3  | 9.2  | -5.0  |
| MYL5      | 2  | 12.2  | 3.9  | 8.3  | -4.4  |
| NPEPL1    | 0  | 9.6   | 4.0  | 5.5  | -1.5  |
| RPL17-C18 | 6  | 27.5  | 7.2  | 20.3 | -13.1 |
| TMEM242   | 0  | 7.3   | 2.9  | 4.4  | -1.4  |
| TMEM167B  | 1  | 14.2  | 10.7 | 3.5  | 7.3   |
| TSTD1     | 0  | 15.3  | 5.5  | 9.9  | -4.4  |
| IFI30     | 4  | 21.9  | 10.9 | 11.0 | -0.2  |
| FNIP1     | 1  | 17.9  | 14.7 | 3.2  | 11.4  |
| CKLF      | 0  | 12.4  | 4.7  | 7.7  | -3.0  |
| PAM16     | 12 | 15.0  | 2.5  | 12.5 | -10.0 |
| CEBPZOS   | 1  | 14.0  | 10.2 | 3.9  | 6.3   |
| ZNF579    | 2  | 30.3  | 13.8 | 16.6 | -2.8  |
| RNASEK    | 0  | 10.1  | 4.8  | 5.3  | -0.6  |
| NBPF1     | 0  | 8.1   | 3.8  | 4.3  | -0.6  |
| VAMP2     | 0  | 12.5  | 6.3  | 6.1  | 0.2   |
| C6orf226  | 2  | 20.2  | 8.5  | 11.7 | -3.1  |
| PPP3R1    | 1  | 36.3  | 31.9 | 4.3  | 27.6  |
| FANCG     | 5  | 11.7  | 2.5  | 9.2  | -6.7  |
| AP4M1     | 0  | 7.8   | 3.9  | 3.9  | 0.1   |
| MAGEA3    | 0  | 7.1   | 3.4  | 3.7  | -0.3  |
| CEBPD     | 2  | 22.3  | 10.6 | 11.7 | -1.2  |
| PPP2R2A   | 0  | 7.1   | 2.4  | 4.7  | -2.4  |
| TRIM16    | 0  | 10.8  | 4.9  | 6.0  | -1.1  |
| SLC12A8   | 0  | 8.3   | 3.5  | 4.8  | -1.4  |
| FADS3     | 3  | 8.4   | 2.7  | 5.7  | -3.0  |
| CCNL2     | 0  | 10.2  | 4.0  | 6.3  | -2.3  |
| UBA52     | 8  | 12.5  | 3.6  | 8.9  | -5.3  |
| PPT2      | 0  | 11.3  | 5.6  | 5.7  | -0.1  |
| EXOSC6    | 2  | 37.8  | 20.3 | 17.5 | 2.8   |
| VPS52     | 0  | 11.4  | 4.4  | 7.0  | -2.5  |
| CPTP      | 2  | 35.4  | 15.7 | 19.6 | -3.9  |

|           |    |      |      |      |       |
|-----------|----|------|------|------|-------|
| ATXN1L    | 2  | 16.7 | 6.5  | 10.2 | -3.7  |
| SMIM13    | 1  | 9.4  | 5.2  | 4.2  | 1.0   |
| C17orf89  | 0  | 11.0 | 4.5  | 6.5  | -2.0  |
| PLEKHM1   | 3  | 19.6 | 5.2  | 14.5 | -9.3  |
| FAM195B   | 0  | 11.2 | 5.5  | 5.7  | -0.1  |
| SLC26A6   | 0  | 10.5 | 4.6  | 5.9  | -1.3  |
| NOL7      | 1  | 16.4 | 10.1 | 6.4  | 3.7   |
| PIGBOS1   | 0  | 7.3  | 2.9  | 4.4  | -1.5  |
| TMEM185B  | 2  | 16.7 | 4.8  | 11.9 | -7.1  |
| HSBP1L1   | 2  | 16.5 | 4.5  | 12.0 | -7.4  |
| WDR46     | 6  | 10.0 | 1.7  | 8.3  | -6.6  |
| PARG      | 1  | 17.9 | 14.1 | 3.8  | 10.3  |
| SCAMP4    | 8  | 17.0 | 3.0  | 13.9 | -10.9 |
| MT-ATP8   | 5  | 10.4 | 3.9  | 6.5  | -2.6  |
| C19orf24  | 2  | 22.9 | 8.7  | 14.2 | -5.5  |
| OST4      | 0  | 10.6 | 5.0  | 5.6  | -0.6  |
| DHFR      | 5  | 22.5 | 10.9 | 11.6 | -0.7  |
| RPL41     | 8  | 14.2 | 1.7  | 12.5 | -10.8 |
| ORM1      | 4  | 17.2 | 10.6 | 6.6  | 4.0   |
| ZNF688    | 11 | 8.3  | 0.8  | 7.5  | -6.7  |
| PET100    | 6  | 18.7 | 7.6  | 11.1 | -3.4  |
| ACBD6     | 3  | 10.1 | 3.0  | 7.0  | -4.0  |
| HSBP1     | 6  | 24.3 | 8.4  | 15.9 | -7.5  |
| RPS18     | 0  | 12.5 | 5.4  | 7.1  | -1.7  |
| TAPBP     | 3  | 21.5 | 9.8  | 11.7 | -1.8  |
| TMA7      | 0  | 7.7  | 2.7  | 5.0  | -2.3  |
| MCTS1     | 0  | 9.2  | 4.0  | 5.1  | -1.1  |
| LINC00493 | 0  | 10.2 | 4.1  | 6.1  | -2.0  |
| PET117    | 0  | 12.5 | 4.9  | 7.6  | -2.7  |
| GPX1      | 0  | 14.1 | 5.0  | 9.1  | -4.1  |
| RPS28     | 8  | 10.9 | 3.2  | 7.7  | -4.5  |
| TRIM26    | 2  | 23.5 | 7.0  | 16.5 | -9.5  |
| H2BFS     | 0  | 6.6  | 3.6  | 3.1  | 0.5   |
| FAM133B   | 1  | 43.1 | 37.4 | 5.7  | 31.7  |
| JRK       | 0  | 9.4  | 4.1  | 5.3  | -1.3  |
| HLA-B     | 3  | 20.4 | 12.5 | 7.9  | 4.7   |
| HNRNPUL2  | 0  | 9.7  | 3.9  | 5.8  | -1.8  |
| ZSCAN31   | 0  | 6.8  | 2.7  | 4.1  | -1.4  |
| C12orf75  | 5  | 10.8 | 2.3  | 8.5  | -6.3  |
| HGH1      | 13 | 20.1 | 3.6  | 16.5 | -12.9 |
| ZBTB22    | 2  | 25.1 | 8.1  | 17.0 | -8.9  |
| ZBED5     | 1  | 41.5 | 37.3 | 4.2  | 33.1  |
| CDKN2AIPN | 0  | 18.4 | 6.4  | 12.0 | -5.6  |
| RGL2      | 0  | 19.0 | 7.8  | 11.2 | -3.4  |
| KIFC1     | 5  | 25.7 | 14.4 | 11.3 | 3.1   |
| C2orf74   | 1  | 9.2  | 5.1  | 4.1  | 0.9   |
| FAM200B   | 3  | 12.3 | 4.0  | 8.4  | -4.4  |
| C9orf69   | 10 | 30.9 | 4.6  | 26.3 | -21.7 |
| TXNDC5    | 0  | 7.1  | 4.0  | 3.2  | 0.8   |
| RNF103    | 4  | 11.8 | 3.2  | 8.6  | -5.4  |
| RBM14     | 5  | 24.6 | 4.8  | 19.9 | -15.1 |
| ALKBH6    | 0  | 13.0 | 4.9  | 8.1  | -3.2  |
| GATS      | 0  | 7.7  | 4.0  | 3.7  | 0.2   |
| NME1      | 5  | 20.0 | 5.8  | 14.2 | -8.4  |



|           |   |      |      |      |       |
|-----------|---|------|------|------|-------|
| WBP1      | 0 | 17.1 | 7.6  | 9.4  | -1.8  |
| MRPS17    | 0 | 15.9 | 6.0  | 9.9  | -3.9  |
| GET4      | 2 | 22.7 | 9.1  | 13.6 | -4.6  |
| ADSL      | 5 | 18.3 | 4.0  | 14.3 | -10.2 |
| LY6G5B    | 8 | 14.3 | 1.7  | 12.6 | -10.8 |
| PSMB9     | 3 | 20.7 | 10.9 | 9.8  | 1.2   |
| PCDHGC3   | 0 | 8.9  | 4.3  | 4.6  | -0.3  |
| COX19     | 2 | 18.7 | 7.0  | 11.8 | -4.8  |
| ACAD11    | 0 | 13.1 | 4.1  | 9.0  | -4.9  |
| PPIL3     | 1 | 24.9 | 21.3 | 3.6  | 17.7  |
| ISY1      | 6 | 22.7 | 6.8  | 16.0 | -9.2  |
| TMEM189   | 0 | 6.5  | 3.3  | 3.2  | 0.1   |
| RDH14     | 1 | 11.3 | 7.5  | 3.8  | 3.7   |
| PLCXD2    | 0 | 7.1  | 2.7  | 4.4  | -1.7  |
| MIF       | 0 | 5.4  | 2.3  | 3.1  | -0.8  |
| NSUN6     | 1 | 13.1 | 10.0 | 3.1  | 7.0   |
| YAE1D1    | 1 | 22.7 | 18.3 | 4.4  | 13.9  |
| CRCP      | 0 | 11.2 | 4.7  | 6.5  | -1.8  |
| RPL36A    | 1 | 7.8  | 4.1  | 3.7  | 0.3   |
| PDXP      | 2 | 22.0 | 9.8  | 12.2 | -2.4  |
| RPP21     | 2 | 15.6 | 4.9  | 10.6 | -5.7  |
| ATP5J2    | 0 | 7.1  | 2.8  | 4.4  | -1.6  |
| AF011889. | 1 | 13.3 | 6.9  | 6.3  | 0.6   |
| ARPC4     | 0 | 9.5  | 4.1  | 5.3  | -1.2  |
| UGT1A1    | 4 | 15.6 | 4.2  | 11.3 | -7.1  |
| ARPC1A    | 2 | 11.0 | 3.4  | 7.6  | -4.3  |
| ATP50     | 0 | 8.7  | 3.7  | 5.0  | -1.3  |
| PISD      | 2 | 13.4 | 4.6  | 8.8  | -4.2  |
| PI4KA     | 0 | 6.9  | 3.3  | 3.6  | -0.4  |
| AKAP2     | 0 | 9.2  | 2.1  | 7.1  | -5.0  |
| AMACR     | 4 | 12.7 | 5.3  | 7.4  | -2.2  |
| MTFP1     | 2 | 15.4 | 4.8  | 10.6 | -5.7  |
| ARFGAP3   | 1 | 13.0 | 6.5  | 6.4  | 0.1   |
| C22orf39  | 0 | 12.5 | 4.5  | 8.0  | -3.5  |
| PEG10     | 7 | 8.2  | 0.7  | 7.5  | -6.8  |
| EIF6      | 5 | 13.0 | 2.7  | 10.3 | -7.6  |
| MRPL20    | 0 | 10.9 | 4.7  | 6.2  | -1.5  |
| ARPIN     | 0 | 8.9  | 4.4  | 4.5  | -0.2  |
| DECR2     | 4 | 18.5 | 6.8  | 11.8 | -5.0  |
| GNG10     | 1 | 34.5 | 27.0 | 7.5  | 19.5  |
| AP5Z1     | 2 | 18.9 | 7.2  | 11.7 | -4.5  |
| MRPL33    | 0 | 8.4  | 2.7  | 5.8  | -3.1  |
| MICAL3    | 3 | 13.2 | 5.1  | 8.2  | -3.1  |
| PRAF2     | 3 | 15.1 | 6.8  | 8.3  | -1.5  |
| C7orf73   | 0 | 6.4  | 2.3  | 4.1  | -1.9  |
| KCTD7     | 0 | 9.2  | 4.3  | 5.0  | -0.7  |
| EFNA4     | 2 | 21.2 | 7.9  | 13.2 | -5.3  |
| C4orf48   | 2 | 21.4 | 8.7  | 12.7 | -4.0  |
| NAT6      | 2 | 24.1 | 11.8 | 12.3 | -0.6  |
| IL10RB    | 0 | 13.6 | 5.9  | 7.7  | -1.8  |
| CFB       | 0 | 9.4  | 4.2  | 5.2  | -1.1  |
| WDR92     | 1 | 8.2  | 4.4  | 3.8  | 0.6   |
| NME2      | 2 | 15.5 | 5.8  | 9.7  | -4.0  |
| NP1PB5    | 1 | 11.1 | 8.5  | 2.6  | 5.8   |

|           |    |      |      |      |       |
|-----------|----|------|------|------|-------|
| TTC4      | 0  | 9.3  | 4.4  | 4.9  | -0.6  |
| ZMYM6NB   | 0  | 8.6  | 4.0  | 4.6  | -0.7  |
| MRPS6     | 0  | 12.9 | 4.5  | 8.4  | -3.8  |
| ZNF512    | 0  | 5.7  | 2.3  | 3.4  | -1.2  |
| GSTA1     | 4  | 9.1  | 2.8  | 6.4  | -3.6  |
| ACY1      | 4  | 24.0 | 9.1  | 14.9 | -5.9  |
| NFS1      | 2  | 23.0 | 9.1  | 13.8 | -4.7  |
| DDOST     | 0  | 11.3 | 5.6  | 5.7  | 0.0   |
| TMEM199   | 0  | 8.7  | 3.4  | 5.3  | -1.8  |
| DNAJC25-C | 1  | 19.0 | 11.6 | 7.3  | 4.3   |
| P2RY11    | 8  | 8.2  | 1.3  | 6.9  | -5.6  |
| TMEM141   | 4  | 20.5 | 6.2  | 14.3 | -8.2  |
| DBNDD2    | 0  | 8.3  | 3.1  | 5.3  | -2.2  |
| ETV5      | 0  | 7.3  | 3.6  | 3.7  | -0.2  |
| RBM12     | 0  | 18.3 | 6.3  | 11.9 | -5.6  |
| APOBEC3C  | 3  | 10.8 | 4.5  | 6.4  | -1.9  |
| UBE2V1    | 7  | 13.3 | 1.1  | 12.2 | -11.1 |
| N4BP2L2   | 1  | 58.1 | 55.2 | 2.9  | 52.3  |
| CEBPA     | 4  | 34.0 | 19.5 | 14.4 | 5.1   |
| H2AFJ     | 0  | 8.1  | 3.0  | 5.1  | -2.1  |
| PGAM5     | 0  | 21.4 | 7.0  | 14.4 | -7.4  |
| ZCCHC3    | 0  | 21.8 | 9.6  | 12.2 | -2.6  |
| TWF2      | 3  | 11.6 | 4.5  | 7.1  | -2.7  |
| MARS2     | 2  | 24.6 | 9.3  | 15.3 | -6.0  |
| BCKDHA    | 0  | 9.5  | 4.2  | 5.3  | -1.1  |
| CDK11B    | 2  | 15.2 | 5.5  | 9.7  | -4.2  |
| ABHD14A   | 0  | 11.2 | 4.5  | 6.7  | -2.2  |
| HAUS5     | 0  | 12.2 | 4.5  | 7.7  | -3.2  |
| PDCD6     | 0  | 6.6  | 3.2  | 3.4  | -0.1  |
| TMEM158   | 3  | 15.6 | 5.5  | 10.1 | -4.5  |
| C15orf38  | 2  | 18.9 | 7.4  | 11.5 | -4.1  |
| ARPC4-TTI | 0  | 7.6  | 4.1  | 3.5  | 0.7   |
| SMIM20    | 0  | 5.9  | 2.7  | 3.2  | -0.5  |
| CHCHD10   | 4  | 10.6 | 3.2  | 7.4  | -4.1  |
| GLI4      | 13 | 9.4  | 1.3  | 8.1  | -6.7  |
| IQCJ-SCH  | 0  | 7.5  | 1.8  | 5.7  | -4.0  |
| SEPP1     | 4  | 13.1 | 7.1  | 6.0  | 1.1   |
| APITD1-CC | 0  | 8.8  | 2.8  | 6.0  | -3.2  |
| CCDC71L   | 0  | 12.7 | 5.3  | 7.3  | -2.0  |
| TRNP1     | 4  | 15.1 | 3.8  | 11.4 | -7.6  |
| ALG11     | 1  | 12.6 | 8.0  | 4.7  | 3.3   |
| ATXN7L3B  | 2  | 20.7 | 7.0  | 13.7 | -6.7  |
| PRKDC     | 1  | 53.1 | 46.2 | 6.9  | 39.3  |
| ZNF260    | 1  | 22.8 | 19.7 | 3.1  | 16.6  |
| LYN       | 0  | 9.2  | 3.5  | 5.6  | -2.1  |
| PINX1     | 2  | 15.3 | 5.3  | 10.0 | -4.6  |
| AP5B1     | 2  | 30.2 | 13.9 | 16.3 | -2.4  |
| CHMP4A    | 0  | 5.4  | 2.3  | 3.1  | -0.8  |
| FPGT      | 1  | 13.6 | 9.4  | 4.2  | 5.2   |
| MEX3A     | 0  | 11.4 | 6.1  | 5.3  | 0.8   |
| EEF1G     | 8  | 17.2 | 1.9  | 15.4 | -13.5 |
| MPV17L2   | 8  | 25.6 | 6.4  | 19.2 | -12.7 |
| BORCS8    | 0  | 11.7 | 4.2  | 7.5  | -3.3  |
| DPP3      | 0  | 9.0  | 4.4  | 4.6  | -0.2  |

|           |    |      |      |      |       |
|-----------|----|------|------|------|-------|
| ANKHD1-E1 | 1  | 7.8  | 3.6  | 4.2  | -0.6  |
| BRK1      | 0  | 9.1  | 4.5  | 4.7  | -0.2  |
| PIGY      | 6  | 24.2 | 11.4 | 12.9 | -1.5  |
| CHMP1B    | 0  | 6.7  | 3.3  | 3.4  | 0.0   |
| RP11-80H  | 0  | 9.8  | 4.6  | 5.2  | -0.6  |
| EID1      | 1  | 31.5 | 27.4 | 4.1  | 23.3  |
| POLR2M    | 1  | 11.2 | 7.4  | 3.8  | 3.6   |
| RP11-234E | 6  | 41.6 | 13.1 | 28.6 | -15.5 |
| APOPT1    | 0  | 8.4  | 3.4  | 5.0  | -1.7  |
| TRAPPC2P1 | 0  | 9.4  | 4.0  | 5.4  | -1.4  |
| HMBS      | 2  | 22.5 | 10.2 | 12.3 | -2.1  |
| DND1      | 2  | 34.9 | 19.1 | 15.8 | 3.3   |
| RP11-73M  | 0  | 10.4 | 3.8  | 6.6  | -2.8  |
| APO03419. | 6  | 20.8 | 5.3  | 15.6 | -10.3 |
| POLG2     | 1  | 16.2 | 12.6 | 3.6  | 9.1   |
| SMIM10L1  | 0  | 9.3  | 4.0  | 5.3  | -1.3  |
| RP11-286N | 2  | 16.0 | 6.0  | 10.0 | -4.0  |
| RP11-111K | 0  | 9.7  | 3.9  | 5.8  | -1.9  |
| KIAA1147  | 0  | 6.4  | 2.6  | 3.8  | -1.2  |
| LSM14A    | 1  | 73.6 | 69.3 | 4.3  | 64.9  |
| GATC      | 0  | 14.6 | 6.0  | 8.5  | -2.5  |
| FNTB      | 0  | 7.4  | 3.3  | 4.1  | -0.7  |
| RP11-603J | 6  | 77.0 | 17.2 | 59.7 | -42.5 |
| CNPY2     | 1  | 13.3 | 6.2  | 7.0  | -0.8  |
| RP11-162F | 4  | 12.7 | 5.1  | 7.7  | -2.6  |
| CUX1      | 0  | 11.1 | 4.9  | 6.2  | -1.3  |
| TEN1      | 0  | 6.4  | 2.9  | 3.5  | -0.6  |
| CHURC1    | 6  | 35.7 | 7.0  | 28.6 | -21.6 |
| C17orf49  | 10 | 20.7 | 1.2  | 19.5 | -18.4 |
| RTEL1     | 2  | 14.0 | 4.6  | 9.4  | -4.7  |
| PDF       | 2  | 48.0 | 26.7 | 21.3 | 5.5   |
| BCL2L2-PA | 0  | 11.9 | 5.1  | 6.8  | -1.7  |
| SYNJ2BP-C | 6  | 48.7 | 16.9 | 31.8 | -15.0 |
| RNASE4    | 4  | 13.2 | 5.3  | 7.9  | -2.6  |
| CEP95     | 1  | 34.2 | 30.7 | 3.5  | 27.2  |
| TUBB3     | 0  | 6.9  | 3.0  | 3.9  | -1.0  |
| RP11-298I | 6  | 26.1 | 6.4  | 19.7 | -13.3 |
| CTD-2116N | 7  | 26.2 | 3.1  | 23.1 | -20.0 |
| TGIF2-C2C | 6  | 56.6 | 13.6 | 43.0 | -29.4 |
| THTPA     | 2  | 14.3 | 5.1  | 9.1  | -4.0  |
| MRPL46    | 4  | 21.3 | 6.7  | 14.6 | -7.8  |
| RP11-468E | 1  | 18.5 | 13.3 | 5.2  | 8.2   |
| RBM15B    | 2  | 31.6 | 14.7 | 16.9 | -2.2  |
| HOXB7     | 0  | 5.0  | 1.9  | 3.1  | -1.2  |
| RP11-103E | 1  | 11.6 | 6.5  | 5.1  | 1.4   |
| RP11-343C | 0  | 14.4 | 6.9  | 7.5  | -0.6  |
| CCPG1     | 1  | 26.5 | 22.9 | 3.6  | 19.4  |
| ZNF865    | 2  | 43.1 | 20.9 | 22.1 | -1.2  |
| BOP1      | 13 | 20.7 | 3.4  | 17.4 | -14.0 |
| RP11-345J | 2  | 29.1 | 12.4 | 16.8 | -4.4  |
| COR07     | 12 | 12.3 | 1.4  | 10.9 | -9.5  |
| OVCA2     | 2  | 24.5 | 10.9 | 13.6 | -2.7  |
| MRPL12    | 5  | 26.1 | 5.3  | 20.8 | -15.5 |
| FAM58A    | 0  | 14.7 | 6.6  | 8.1  | -1.5  |

|           |   |      |      |      |       |
|-----------|---|------|------|------|-------|
| GTF2I     | 1 | 17.5 | 12.3 | 5.2  | 7.1   |
| SRSF8     | 2 | 14.8 | 6.2  | 8.6  | -2.3  |
| IKBKE     | 2 | 16.8 | 4.4  | 12.3 | -7.9  |
| DYNLL2    | 0 | 10.0 | 3.9  | 6.1  | -2.3  |
| OTUD7B    | 9 | 10.9 | 3.2  | 7.7  | -4.6  |
| RBM8A     | 9 | 11.3 | 1.1  | 10.2 | -9.2  |
| TIMM23    | 5 | 11.2 | 2.1  | 9.1  | -7.0  |
| RNF115    | 9 | 7.5  | 2.0  | 5.5  | -3.5  |
| RPL17     | 0 | 8.2  | 3.4  | 4.7  | -1.3  |
| SEC22B    | 1 | 11.1 | 5.7  | 5.4  | 0.3   |
| TXNIP     | 0 | 5.8  | 2.4  | 3.3  | -0.9  |
| SRGAP2    | 3 | 17.9 | 8.0  | 9.9  | -1.9  |
| BAHCC1    | 0 | 11.5 | 4.6  | 6.9  | -2.3  |
| RP11-159I | 1 | 11.7 | 7.2  | 4.5  | 2.6   |
| STRADA    | 0 | 8.9  | 4.4  | 4.5  | 0.0   |
| NBPF15    | 9 | 10.1 | 1.2  | 8.9  | -7.7  |
| NCOA4     | 1 | 10.1 | 7.5  | 2.6  | 4.9   |
| MRPS21    | 9 | 7.2  | 0.9  | 6.4  | -5.5  |
| MYO15B    | 4 | 13.4 | 4.3  | 9.1  | -4.8  |
| AARSD1    | 0 | 11.4 | 4.3  | 7.1  | -2.7  |
| AC005943. | 6 | 12.2 | 4.1  | 8.1  | -4.0  |
| RP11-49K2 | 6 | 44.4 | 14.7 | 29.6 | -14.9 |
| FDX1L     | 8 | 23.6 | 6.4  | 17.2 | -10.8 |
| ZNF224    | 1 | 17.9 | 15.2 | 2.7  | 12.5  |
| LUZP6     | 6 | 69.1 | 21.9 | 47.2 | -25.3 |
| LIN37     | 0 | 8.2  | 3.7  | 4.5  | -0.8  |
| NDUFA7    | 8 | 20.9 | 6.5  | 14.4 | -8.0  |
| AC104534. | 6 | 31.7 | 8.0  | 23.7 | -15.7 |
| RP3-461F1 | 0 | 17.2 | 6.6  | 10.6 | -4.0  |
| CTC-429P9 | 1 | 24.7 | 18.2 | 6.5  | 11.8  |
| FBXO17    | 0 | 7.4  | 3.3  | 4.1  | -0.8  |
| IKBKG     | 0 | 13.2 | 6.5  | 6.8  | -0.3  |
| TMEM185A  | 0 | 6.3  | 3.3  | 3.0  | 0.3   |
| NBPF9     | 2 | 13.2 | 3.9  | 9.3  | -5.5  |
| EGLN2     | 2 | 10.9 | 3.6  | 7.3  | -3.6  |
| COMMD3-BM | 0 | 10.1 | 3.8  | 6.4  | -2.6  |
| C7orf55-1 | 6 | 24.8 | 8.9  | 15.9 | -7.0  |
| NCBP2-AS2 | 2 | 32.8 | 15.3 | 17.5 | -2.2  |
| TAF15     | 1 | 16.1 | 12.5 | 3.5  | 9.0   |
| HSPE1-MOF | 6 | 72.9 | 16.6 | 56.3 | -39.6 |
| RPS10-NU1 | 6 | 13.2 | 3.8  | 9.4  | -5.6  |
| SRXN1     | 0 | 10.0 | 4.6  | 5.5  | -0.9  |
| LIX1L     | 3 | 9.7  | 3.4  | 6.4  | -3.0  |
| NUDT3     | 0 | 8.5  | 3.9  | 4.5  | -0.6  |
| KMT2B     | 0 | 4.2  | 2.0  | 2.1  | -0.1  |
| POM121C   | 0 | 12.6 | 6.5  | 6.1  | 0.4   |
| CD24      | 0 | 8.2  | 3.0  | 5.2  | -2.2  |
| FAM47E-ST | 0 | 7.3  | 2.0  | 5.3  | -3.4  |
| ZNF595    | 0 | 8.7  | 2.9  | 5.8  | -2.9  |
| RP11-343C | 6 | 48.2 | 13.1 | 35.0 | -21.9 |
| DCP1A     | 0 | 10.7 | 4.5  | 6.2  | -1.6  |
| RP11-574K | 0 | 9.9  | 4.7  | 5.2  | -0.5  |
| RP11-500M | 6 | 55.1 | 14.3 | 40.8 | -26.5 |
| SNURF     | 6 | 12.4 | 3.4  | 9.0  | -5.6  |

|           |    |      |      |      |       |
|-----------|----|------|------|------|-------|
| CWC25     | 0  | 5.7  | 2.1  | 3.6  | -1.5  |
| ZNHIT3    | 0  | 10.7 | 4.1  | 6.7  | -2.6  |
| CYFIP1    | 0  | 6.8  | 3.2  | 3.5  | -0.3  |
| TAF9      | 1  | 47.2 | 41.0 | 6.2  | 34.8  |
| NOL12     | 2  | 21.7 | 8.3  | 13.4 | -5.2  |
| SOCS7     | 0  | 12.1 | 5.6  | 6.5  | -0.8  |
| WBSCR16   | 2  | 19.4 | 7.4  | 12.0 | -4.7  |
| MLLT6     | 0  | 7.5  | 3.7  | 3.9  | -0.2  |
| PPP4R3B   | 1  | 62.5 | 59.1 | 3.4  | 55.6  |
| SYNRG     | 0  | 8.1  | 4.0  | 4.1  | -0.2  |
| SGK223    | 2  | 19.6 | 6.8  | 12.8 | -6.0  |
| HNF1B     | 0  | 11.7 | 4.7  | 7.0  | -2.4  |
| AATF      | 5  | 11.2 | 2.7  | 8.5  | -5.8  |
| ARHGAP23  | 3  | 14.2 | 8.0  | 6.2  | 1.8   |
| TUBGCP5   | 1  | 16.7 | 12.8 | 4.0  | 8.8   |
| DUSP14    | 0  | 10.8 | 4.3  | 6.5  | -2.2  |
| UHRF1     | 5  | 17.6 | 6.9  | 10.7 | -3.8  |
| ORAI1     | 2  | 23.4 | 8.8  | 14.6 | -5.8  |
| TADA2A    | 0  | 10.8 | 4.3  | 6.5  | -2.1  |
| PIP4K2B   | 0  | 14.4 | 7.8  | 6.6  | 1.2   |
| PIGW      | 0  | 7.8  | 2.9  | 4.9  | -2.0  |
| PCGF2     | 0  | 5.7  | 2.9  | 2.8  | 0.1   |
| MARCKS    | 0  | 6.7  | 2.9  | 3.8  | -0.9  |
| AC009133. | 11 | 16.9 | 1.3  | 15.6 | -14.4 |
| PSMB3     | 5  | 21.5 | 4.7  | 16.8 | -12.1 |
| CISD3     | 0  | 21.2 | 7.0  | 14.1 | -7.1  |
| DDX52     | 1  | 20.3 | 15.9 | 4.4  | 11.5  |
| MYO19     | 5  | 10.4 | 2.0  | 8.4  | -6.5  |
| GGNBP2    | 1  | 69.5 | 66.4 | 3.1  | 63.4  |
| DHRS11    | 2  | 26.8 | 12.2 | 14.5 | -2.3  |
| ACACA     | 1  | 12.1 | 6.1  | 6.1  | 0.0   |
| C11orf98  | 0  | 16.8 | 5.8  | 11.0 | -5.2  |
| MRM1      | 2  | 40.0 | 21.7 | 18.3 | 3.5   |
| MRPL45    | 0  | 15.3 | 5.0  | 10.3 | -5.3  |
| AL109927. | 6  | 38.8 | 17.5 | 21.3 | -3.8  |
| AC006449. | 0  | 7.6  | 3.7  | 3.9  | -0.1  |
| AC008522. | 3  | 12.1 | 4.9  | 7.2  | -2.3  |
| AC009065. | 6  | 10.5 | 1.7  | 8.8  | -7.1  |
| AL589743. | 0  | 5.6  | 2.4  | 3.2  | -0.8  |
| AP000769. | 1  | 18.8 | 16.1 | 2.8  | 13.3  |
| AC008074. | 1  | 26.4 | 22.5 | 3.9  | 18.6  |
| AL513523. | 9  | 13.4 | 4.0  | 9.4  | -5.3  |
| AC004813. | 0  | 10.0 | 3.9  | 6.0  | -2.1  |
| AC110615. | 1  | 30.3 | 24.6 | 5.7  | 19.0  |
| PAGR1     | 11 | 32.0 | 5.0  | 27.1 | -22.1 |
| CTD-2574I | 6  | 16.5 | 4.0  | 12.5 | -8.5  |
| 2-Mar     | 8  | 13.4 | 2.1  | 11.3 | -9.3  |
| AKR1C3    | 0  | 17.0 | 6.8  | 10.2 | -3.4  |
| MATR3     | 1  | 68.4 | 63.1 | 5.3  | 57.7  |
| RABL6     | 0  | 7.9  | 2.4  | 5.5  | -3.1  |
| TMBIM4    | 1  | 8.8  | 5.6  | 3.2  | 2.3   |

Table S2 All the Differential expressed modules (DEMs) in different HCC development stages

| Module | HCC vs. normal | HCC vs. HCV | HCV vs. normal | HCC vs. HCC_cirrhosis |
|--------|----------------|-------------|----------------|-----------------------|
| 1      |                |             |                |                       |
| 2      | 1.00E-07       | <1E-7       | 1.00E-07       | 3.00E-04              |
| 3      | <1E-7          | <1E-7       | <1E-7          |                       |
| 4      | <1E-7          |             | 4.00E-05       |                       |
| 5      | <1E-7          | 1.00E-07    |                | 0.001                 |
| 6      | <1E-7          | <1E-7       | <1E-7          | 1.00E-05              |
| 7      | <1E-7          |             |                |                       |
| 8      | 0.002          | 8.00E-04    | 0.003          | 2.00E-04              |
| 9      | <1E-7          | <1E-7       | 1.00E-07       | 3.00E-07              |
| 10     | 2.00E-04       | 8.00E-07    | <1E-7          | 6.00E-05              |
| 11     |                | 6.00E-07    |                | 7.00E-04              |
| 12     |                | 8.00E-04    |                | 0.001                 |
| 13     | 4.00E-05       | 7.00E-04    | 1.00E-05       | 4.00E-05              |

Table S3 Switch genes identified during HCC development

|          |           |          |          |           |          |          |          |          |
|----------|-----------|----------|----------|-----------|----------|----------|----------|----------|
| FAM214B  | SIRT6     | BRF2     | ZBTB17   | WDR74     | PSEN2    | IL17RC   | C2CD2L   | PRKAR1B  |
| CRLF1    | TCF7      | SH2D4A   | KDM5B    | IPO8      | SOX13    | CRELD1   | RARG     | NDOR1    |
| ARSD     | KIAA0141  | KCNN4    | CDC20    | MICAL2    | COPS7B   | ELP6     | DLGAP1   | POM121   |
| ST7L     | REST      | NFKBIB   | NENF     | RBM17     | OSBPL10  | RPN1     | SNCG     | CACNA1H  |
| NADK     | KIF3C     | PPP6R1   | PHF3     | DHX34     | GNA12    | IFT122   | VEGFB    | ZNF512B  |
| SPAG9    | BCORL1    | DYRK1B   | TGIF2    | STT3A     | TMEM209  | PLXNB1   | PEAK1    | GM2A     |
| NFIX     | RAD54L    | MEGF8    | UBN1     | PSAT1     | RPL10    | ITGA2    | CHD2     | S100A2   |
| ST3GAL1  | MAST2     | DBP      | DCAF4    | HNF1A     | CHMP7    | ERAP1    | C11orf80 | C6orf106 |
| IFFO1    | SRRT      | DDX49    | TTL5     | TRAFD1    | GINS4    | PHKG1    | CBX2     | LAMB3    |
| PHF7     | CNOT3     | SUGP1    | SIL1     | ATP5G2    | VLDLR    | INTS1    | SPTBN2   | PDLIM7   |
| HFE      | EPB41L1   | CADM4    | SORBS3   | GDF11     | PTGES2   | DCAF13   | ZDHHC24  | RPE      |
| MKS1     | SLC8B1    | CDK6     | TRIM25   | TROAP     | TUT1     | GTF2A1   | SLC29A2  | PHF2     |
| POLA2    | RAB11FIP3 | WDR91    | MAPK8IP1 | B4GALNT1  | MTA2     | NSD1     | BRMS1    | TEAD4    |
| NUDCD3   | CERS4     | CASP2    | PEX16    | FBXL8     | PLCB3    | ENOX2    | HRAS     | ZBTB14   |
| B4GALT7  | EFNB1     | MOSPD3   | ZC3H13   | VPS45     | TAOK2    | SNAPC4   | PACS1    | TFDP1    |
| BRD9     | DTX2      | AP1S1    | VAPB     | HS6ST1    | DCUN1D2  | NSMF     | ZNF408   | WWP2     |
| RABEP1   | CDC45     | DNM1     | ARFGEF2  | ODF2      | NUBPL    | ZNF219   | ATG13    | MAFK     |
| BAK1     | CRAT      | RAPGEF1  | BCAS4    | ST6GALNAc | BICD1    | UBTD1    | TOM1L2   | GPATCH3  |
| ATP6VOA1 | ITPR3     | ABCA2    | BTN2A2   | USP20     | CENPJ    | RPUSD2   | SFN      | SREBF2   |
| PEX3     | SCD       | GIT1     | MED20    | DSCC1     | MGAT5    | TRMT61A  | LPCAT4   | ATG9A    |
| VCL      | TMED1     | RNF43    | KLHDC3   | TUBB2B    | SREK1IP1 | POLL     | WDR25    | APRT     |
| FBXO42   | MZF1      | DRG2     | C16orf70 | MDC1      | RMND5A   | FRS2     | SGF29    | GDI1     |
| PQLC2    | MYO9B     | B9D1     | ARMC7    | CREBZF    | MPPE1    | ATP9B    | POLE     | TRAF3IP1 |
| THAP3    | CEP170B   | CYTH1    | MBOAT7   | ITPKA     | NRG1     | PLK1     | SLC25A22 | BMPR2    |
| GEMIN8   | KLHL22    | RAB5C    | OPA3     | APH1B     | TNFRSF14 | DOLPP1   | PIDD1    | FKBPL    |
| RRP12    | GTPBP1    | MFS10    | RTN2     | PPCDC     | FANCC    | C15orf39 | POLR2L   | DXO      |
| FOXN3    | RHBDD3    | NCAPG    | EML2     | NABP2     | MRAS     | DUS2     | BET1L    | VAR5     |
| USE1     | TAB1      | DNAJC4   | ZNF133   | MAP3K12   | SPATA2L  | AXL      | ERN1     | MSH5     |
| RC3H2    | KCTD17    | SNX15    | NCLN     | RAB15     | DMTN     | TRAPPC9  | FARSA    | PRR3     |
| PTPRU    | TRMU      | TRIM3    | MMP24    | BAHD1     | CHAF1B   | CHAF1A   | SAMD4B   | GNL1     |
| TNK2     | SGK2      | CEP164   | EIF2S2   | PML       | HLCS     | SEMA6B   | CALR     | DCTN1    |
| POLD1    | HNF4A     | AMBRA1   | KDM5C    | UNC45A    | ATP13A2  | MLST8    | GATA2    | ADGRG1   |
| GPC1     | PFDN4     | MADD     | XRCC3    | DHX38     | RGS12    | SCARA3   | PHLDA2   | KRT81    |
| HIPK2    | ARFGAP1   | SLC35F2  | LRRC61   | OSGIN1    | ARHGAP35 | POLR2J3  | GINS3    | CPT1B    |
| ABCA7    | EEF1A2    | P3H3     | IDUA     | GAS8      | WDR4     | COG7     | PYCR1    | CEMP1    |
| SLC9A3R2 | C20orf27  | OGFOD2   | SLC35E1  | KSR1      | RRP1B    | SERINC2  | TRAIIP   | SLC48A1  |
| TMEM206  | ARFRP1    | STX2     | PKMYT1   | PELP1     | CACFD1   | ZSWIM1   | PGP      | MXD3     |
| STOML1   | POFUT1    | ING4     | RBM48    | WRAP53    | MED27    | ZNF507   | C22orf46 | PPME1    |
| DGCR2    | E2F1      | CDCA3    | CD68     | ARHGDI1   | FAM189B  | CD2BP2   | TSSC4    | ZSWIM8   |
| RNF126   | ACTR5     | USP5     | KIF1C    | TBCD      | ORAI2    | RGS14    | CSF1     | MYL5     |
| TCOF1    | SUV39H1   | SLC39A7  | ASH2L    | CEP131    | DVL3     | LUZP1    | THAP7    | C19orf24 |
| MBD3     | CCDC22    | CUL9     | GAMT     | ELAC1     | FDXR     | RAC3     | MED12    | RPS28    |
| SPEG     | UBL4A     | HMGXB3   | GTPBP3   | FKBP10    | TMEM143  | ZNF768   | DDX51    | JRK      |
| ZZEF1    | NDRG4     | BNIP1    | TUBGCP2  | PFKL      | EMC10    | CHD3     | GAS2L1   | KIFC1    |
| TTC38    | VAC14     | PFKFB4   | TAF4     | IFNAR1    | CCNF     | ZNF282   | RAD51D   | AP5Z1    |
| ACAT1    | SLC7A6    | COL7A1   | TMEM160  | URB1      | AMDHD2   | NFRKB    | ZNF696   | NAT6     |
| VPS9D1   | NPRL3     | PLXNA1   | MAP3K10  | GEMIN7    | PAQR4    | IRF2BP1  | PCYT2    | P2RY11   |
| WDR62    | USP10     | MAPKAPK3 | PPF1A1   | RNPEPL1   | CLPB     | POLH     | RASA3    | ATXN7L3B |
| MKRN2    | TSC2      | KANSL3   | STARD3   | RERE      | TAF6L    | NUDT6    | NF2      | IKBKE    |
| SLC46A1  | NARFL     | ABCB6    | LLGL1    | TARS2     | STX5     | ATP6VOE2 | UBE2H    | STRADA   |
| XAB2     | FAM173A   | HDLBP    | FAAP24   | ARNT      | ZFPL1    | ZNF692   | PPARA    | MYO19    |
| STXBP2   | FBXO31    | HPCAL1   | CC2D1A   | ATP8B2    | TGFBR2   | GAA      | IFT140   | MRM1     |
| MAP2K7   | KNOP1     | MIIP     | NUP210   | ADAM15    | ANKZF1   | BCL2L1   | ZNF286A  | RABL6    |

|  |       |      |       |         |        |     |      |  |
|--|-------|------|-------|---------|--------|-----|------|--|
|  | AAGAB | SMG7 | PRMT7 | C1orf35 | HDAC11 | FGG | AGRN |  |
|--|-------|------|-------|---------|--------|-----|------|--|



Table S4 Drug-ME correlation matrix for LIMORE

|              | ME5    | ME6    | ME1    | ME7    | ME3    | ME9   | ME4   | ME8    | ME10   | ME13   | ME12   | ME2    | ME11   |
|--------------|--------|--------|--------|--------|--------|-------|-------|--------|--------|--------|--------|--------|--------|
| AT-7519      | -0.073 | -0.295 | -0.154 | -0.234 | -0.042 | 0.194 | 0.325 | 0.081  | 0.083  | 0.073  | 0.055  | 0.165  | -0.022 |
| AZD7762      | -0.006 | -0.350 | -0.338 | -0.290 | -0.172 | 0.303 | 0.508 | 0.195  | 0.170  | 0.237  | 0.384  | 0.358  | 0.300  |
| Belinostat   | -0.030 | -0.311 | -0.189 | -0.206 | -0.044 | 0.218 | 0.317 | 0.094  | 0.098  | 0.180  | 0.124  | 0.145  | 0.075  |
| BEZ235       | -0.250 | -0.254 | -0.135 | -0.311 | -0.210 | 0.163 | 0.356 | 0.116  | 0.097  | 0.092  | 0.155  | 0.239  | 0.132  |
| BGJ398       | -0.114 | -0.230 | -0.225 | -0.281 | -0.040 | 0.306 | 0.297 | 0.014  | 0.030  | 0.312  | 0.313  | 0.213  | 0.166  |
| BI2536       | -0.029 | -0.244 | -0.375 | -0.325 | 0.089  | 0.198 | 0.340 | 0.244  | 0.076  | 0.092  | 0.310  | 0.266  | 0.220  |
| Bosutinib    | -0.143 | -0.116 | -0.216 | -0.249 | -0.149 | 0.205 | 0.334 | 0.149  | 0.185  | 0.188  | 0.350  | 0.229  | 0.159  |
| BX-912       | -0.039 | -0.003 | -0.093 | -0.113 | -0.249 | 0.124 | 0.400 | 0.081  | 0.023  | 0.066  | 0.118  | 0.156  | 0.025  |
| Carfilzomib  | -0.110 | -0.209 | -0.008 | -0.132 | -0.146 | 0.293 | 0.305 | -0.083 | -0.029 | 0.094  | 0.135  | 0.007  | -0.024 |
| CB-839       | -0.062 | -0.105 | -0.109 | -0.157 | -0.226 | 0.084 | 0.323 | -0.121 | 0.195  | 0.168  | 0.395  | 0.183  | 0.069  |
| Cisplatin    | -0.019 | -0.080 | -0.155 | -0.109 | -0.165 | 0.048 | 0.320 | 0.221  | 0.007  | -0.018 | 0.058  | 0.181  | -0.016 |
| Cobimetinib  | 0.013  | -0.092 | -0.327 | -0.229 | -0.141 | 0.522 | 0.254 | -0.036 | 0.118  | 0.348  | 0.471  | 0.354  | 0.411  |
| CP-466722    | -0.191 | -0.139 | -0.030 | -0.155 | -0.312 | 0.235 | 0.301 | -0.028 | 0.162  | 0.123  | 0.227  | 0.155  | 0.039  |
| Crizotinib   | -0.064 | -0.154 | -0.140 | -0.157 | -0.132 | 0.120 | 0.354 | 0.054  | 0.049  | 0.124  | 0.311  | 0.139  | 0.119  |
| Daporinad    | -0.061 | -0.286 | -0.293 | -0.230 | 0.128  | 0.181 | 0.329 | 0.216  | 0.001  | 0.143  | 0.033  | 0.145  | 0.101  |
| Dasatinib    | -0.097 | -0.193 | -0.203 | -0.247 | -0.375 | 0.298 | 0.541 | 0.049  | 0.243  | 0.232  | 0.373  | 0.287  | 0.213  |
| Dovitinib    | -0.130 | -0.278 | -0.137 | -0.253 | -0.113 | 0.207 | 0.385 | 0.067  | -0.046 | 0.120  | 0.296  | 0.114  | 0.150  |
| Doxorubicin  | -0.079 | -0.291 | -0.393 | -0.356 | 0.158  | 0.314 | 0.318 | 0.122  | 0.028  | 0.281  | 0.248  | 0.323  | 0.233  |
| Epirubicin   | -0.083 | -0.277 | -0.410 | -0.384 | 0.092  | 0.396 | 0.375 | 0.111  | 0.114  | 0.275  | 0.297  | 0.364  | 0.218  |
| Erastin      | -0.244 | -0.327 | -0.206 | -0.412 | -0.085 | 0.382 | 0.320 | -0.019 | 0.110  | 0.413  | 0.147  | 0.218  | 0.122  |
| Etoposide    | -0.082 | -0.154 | -0.210 | -0.208 | 0.025  | 0.159 | 0.313 | -0.014 | -0.017 | 0.168  | 0.165  | 0.149  | 0.112  |
| Foretinib    | 0.035  | -0.228 | -0.316 | -0.209 | -0.075 | 0.218 | 0.253 | 0.222  | 0.094  | 0.216  | 0.362  | 0.348  | 0.398  |
| Ganetespib   | 0.013  | -0.132 | -0.158 | -0.073 | 0.131  | 0.394 | 0.032 | -0.107 | 0.025  | 0.228  | 0.186  | 0.112  | 0.069  |
| GSK126       | -0.147 | -0.237 | -0.232 | -0.308 | 0.122  | 0.224 | 0.167 | -0.028 | 0.029  | 0.169  | 0.139  | 0.172  | 0.255  |
| Ibrutinib    | -0.084 | 0.036  | -0.130 | -0.123 | -0.150 | 0.198 | 0.168 | -0.042 | 0.082  | 0.222  | 0.324  | 0.176  | 0.225  |
| Ispinesib    | -0.136 | -0.061 | -0.168 | -0.221 | -0.310 | 0.111 | 0.356 | 0.205  | 0.253  | 0.012  | 0.268  | 0.291  | 0.144  |
| JNJ-26854165 | 0.008  | -0.110 | -0.296 | -0.282 | -0.033 | 0.311 | 0.341 | 0.083  | -0.024 | 0.209  | 0.206  | 0.284  | 0.163  |
| Methotrexate | 0.030  | 0.142  | -0.033 | 0.006  | 0.326  | 0.095 | ##### | -0.050 | -0.177 | -0.197 | -0.148 | -0.167 | -0.022 |
| Paclitaxel   | -0.160 | -0.177 | -0.155 | -0.307 | -0.178 | 0.183 | 0.387 | 0.041  | 0.030  | 0.200  | 0.195  | 0.162  | 0.098  |
| Palbociclib  | -0.206 | -0.292 | -0.163 | -0.307 | 0.059  | 0.240 | 0.246 | 0.130  | -0.104 | 0.133  | 0.011  | 0.068  | 0.141  |
| Panobinostat | -0.034 | -0.338 | -0.240 | -0.210 | 0.124  | 0.224 | 0.257 | 0.126  | 0.117  | 0.159  | 0.067  | 0.118  | 0.070  |
| PF-562271    | -0.065 | -0.264 | -0.179 | -0.235 | -0.140 | 0.122 | 0.434 | 0.041  | 0.012  | 0.015  | 0.180  | 0.221  | 0.042  |
| PI-103       | -0.086 | -0.275 | -0.300 | -0.348 | -0.202 | 0.418 | 0.529 | -0.036 | 0.139  | 0.408  | 0.509  | 0.336  | 0.272  |

|                |        |        |        |        |        |       |       |        |        |        |       |       |       |
|----------------|--------|--------|--------|--------|--------|-------|-------|--------|--------|--------|-------|-------|-------|
| Piperlongumine | -0.230 | -0.270 | -0.131 | -0.327 | -0.138 | 0.310 | 0.433 | -0.074 | -0.041 | 0.118  | 0.301 | 0.126 | 0.051 |
| Pirarubicin    | -0.124 | -0.184 | -0.293 | -0.337 | 0.080  | 0.254 | 0.295 | 0.086  | -0.034 | 0.098  | 0.158 | 0.219 | 0.137 |
| Ponatinib      | -0.191 | -0.266 | -0.268 | -0.372 | -0.126 | 0.373 | 0.385 | 0.073  | 0.084  | 0.261  | 0.264 | 0.287 | 0.199 |
| Ruxolitinib    | -0.125 | -0.016 | -0.142 | -0.215 | -0.275 | 0.040 | 0.393 | 0.028  | -0.046 | 0.136  | 0.233 | 0.191 | 0.241 |
| Simvastatin    | -0.094 | -0.057 | -0.033 | -0.144 | -0.554 | 0.167 | 0.479 | -0.067 | 0.184  | 0.219  | 0.430 | 0.198 | 0.166 |
| Sunitinib      | 0.065  | -0.166 | -0.248 | -0.174 | 0.086  | 0.225 | 0.185 | 0.077  | 0.089  | 0.307  | 0.209 | 0.212 | 0.106 |
| TAE684         | -0.052 | -0.166 | -0.062 | -0.141 | -0.299 | 0.167 | 0.435 | 0.017  | -0.070 | 0.120  | 0.307 | 0.126 | 0.152 |
| Tipifarnib     | -0.074 | -0.166 | -0.262 | -0.307 | -0.019 | 0.268 | 0.375 | 0.106  | 0.074  | 0.116  | 0.177 | 0.164 | 0.171 |
| Tivantinib     | -0.091 | -0.008 | -0.042 | -0.188 | -0.347 | 0.104 | 0.367 | 0.079  | 0.088  | 0.056  | 0.176 | 0.126 | 0.036 |
| Trametinib     | 0.053  | -0.063 | -0.105 | 0.029  | -0.160 | 0.232 | 0.084 | -0.196 | 0.084  | 0.260  | 0.360 | 0.185 | 0.296 |
| Vinblastine    | -0.146 | -0.087 | -0.058 | -0.235 | -0.322 | 0.051 | 0.434 | 0.086  | 0.102  | 0.050  | 0.136 | 0.125 | 0.003 |
| Vorasidenib    | -0.082 | -0.063 | -0.180 | -0.238 | -0.184 | 0.239 | 0.362 | 0.019  | 0.118  | 0.140  | 0.124 | 0.218 | 0.034 |
| YK-4-279       | -0.076 | -0.007 | -0.096 | -0.180 | -0.365 | 0.106 | 0.382 | 0.117  | 0.120  | 0.121  | 0.208 | 0.193 | 0.098 |
| YM155          | -0.067 | -0.131 | -0.128 | -0.209 | -0.222 | 0.265 | 0.422 | 0.048  | -0.036 | -0.030 | 0.329 | 0.192 | 0.148 |

Table S5 Drug-ME correlation matrix for LCCL

|                  | ME1    | ME2    | ME3    | ME4    | ME5    | ME6    | ME7    | ME8    | ME9    | ME10   | ME11   | ME12   | ME13   |
|------------------|--------|--------|--------|--------|--------|--------|--------|--------|--------|--------|--------|--------|--------|
| Doxorubicin      | -0.107 | -0.409 | 0.162  | -0.120 | -0.192 | -0.384 | -0.086 | -0.285 | 0.579  | 0.000  | -0.186 | -0.296 | -0.070 |
| Entinostat       | 0.054  | -0.052 | 0.205  | -0.391 | 0.067  | 0.101  | 0.186  | 0.199  | -0.028 | 0.032  | 0.328  | -0.031 | 0.072  |
| Alvespimycin     | -0.569 | -0.148 | 0.375  | -0.214 | -0.345 | -0.335 | -0.342 | 0.298  | -0.073 | 0.004  | 0.186  | 0.149  | 0.224  |
| Tanespimycin     | -0.345 | -0.390 | 0.500  | -0.429 | -0.400 | -0.359 | -0.235 | 0.073  | 0.108  | 0.088  | 0.044  | -0.257 | 0.031  |
| Bortezomib       | 0.003  | -0.219 | 0.029  | -0.059 | -0.110 | -0.052 | -0.015 | -0.070 | -0.078 | 0.014  | 0.158  | -0.245 | 0.072  |
| Selumetinib      | -0.097 | 0.009  | 0.182  | -0.120 | 0.163  | 0.035  | 0.161  | 0.294  | -0.047 | 0.000  | 0.218  | 0.015  | 0.059  |
| Trametinib       | 0.140  | 0.161  | 0.094  | -0.327 | 0.310  | 0.237  | 0.388  | -0.041 | 0.053  | -0.002 | 0.192  | 0.197  | 0.211  |
| Linsitinib       | -0.020 | -0.416 | 0.415  | -0.463 | -0.055 | -0.031 | 0.115  | -0.030 | -0.010 | -0.171 | 0.081  | -0.232 | -0.038 |
| Dasatinib        | 0.066  | 0.173  | -0.103 | -0.032 | 0.011  | 0.188  | 0.092  | 0.156  | 0.177  | -0.074 | 0.102  | 0.211  | 0.050  |
| Navitoclax       | 0.126  | 0.130  | 0.040  | -0.317 | 0.005  | 0.269  | 0.120  | 0.208  | 0.127  | 0.177  | 0.415  | 0.321  | 0.077  |
| Tivantinib       | -0.197 | -0.019 | -0.045 | 0.067  | -0.368 | -0.131 | -0.387 | 0.177  | 0.125  | 0.244  | 0.173  | 0.153  | 0.117  |
| Rapamycin        | -0.182 | -0.301 | 0.407  | -0.304 | -0.205 | -0.277 | -0.108 | -0.020 | 0.075  | 0.096  | -0.040 | -0.085 | -0.097 |
| PF.04691502      | 0.288  | 0.123  | -0.139 | 0.003  | 0.135  | 0.332  | 0.178  | -0.077 | -0.265 | -0.066 | 0.366  | 0.185  | -0.197 |
| Paclitaxel       | -0.390 | -0.304 | 0.326  | -0.174 | -0.549 | -0.367 | -0.400 | 0.272  | 0.299  | 0.186  | 0.110  | -0.189 | -0.041 |
| Vinblastine      | 0.005  | -0.282 | 0.020  | 0.044  | -0.314 | -0.123 | -0.200 | 0.072  | 0.184  | 0.038  | 0.076  | -0.294 | -0.209 |
| JNJ.38877605     | 0.125  | 0.034  | 0.068  | -0.132 | 0.005  | 0.151  | 0.133  | -0.003 | -0.480 | -0.124 | -0.014 | -0.142 | -0.202 |
| PHA.665752       | 0.070  | -0.445 | 0.325  | -0.369 | -0.133 | -0.134 | 0.103  | -0.263 | -0.144 | -0.168 | -0.080 | -0.392 | -0.388 |
| BLU.9931         | 0.012  | -0.154 | 0.247  | -0.290 | -0.055 | -0.078 | 0.127  | -0.084 | 0.143  | -0.021 | -0.106 | -0.233 | 0.167  |
| Regorafenib      | -0.093 | 0.014  | 0.202  | -0.205 | -0.150 | -0.093 | -0.084 | 0.029  | 0.074  | 0.004  | 0.174  | 0.026  | -0.013 |
| Refametinib      | -0.132 | -0.008 | 0.327  | -0.402 | 0.113  | -0.072 | 0.181  | 0.040  | -0.063 | 0.152  | 0.161  | 0.061  | 0.226  |
| ICG.001          | -0.061 | -0.346 | 0.302  | -0.322 | -0.048 | -0.158 | 0.106  | -0.119 | -0.114 | 0.163  | -0.080 | -0.076 | -0.257 |
| Sorafenib        | -0.403 | -0.378 | 0.482  | -0.386 | -0.408 | -0.383 | -0.230 | -0.089 | 0.201  | -0.025 | -0.023 | -0.156 | -0.069 |
| Sorafenib MK.220 | -0.165 | -0.350 | 0.489  | -0.529 | -0.067 | -0.141 | 0.170  | 0.073  | 0.040  | -0.177 | 0.123  | -0.188 | -0.128 |
| MK.2206          | 0.003  | -0.304 | 0.258  | -0.331 | -0.031 | -0.054 | 0.171  | -0.013 | -0.025 | -0.332 | 0.170  | -0.229 | -0.234 |
| Resminostat      | 0.183  | -0.294 | 0.257  | -0.379 | 0.109  | 0.105  | 0.336  | -0.149 | -0.088 | -0.165 | 0.081  | -0.498 | -0.131 |
| Sorafenib Resmin | 0.046  | -0.262 | 0.262  | -0.300 | 0.020  | 0.062  | 0.227  | -0.194 | 0.071  | -0.297 | 0.020  | -0.433 | -0.148 |
| Alisertib        | -0.340 | -0.414 | 0.241  | 0.013  | -0.441 | -0.462 | -0.348 | -0.107 | 0.072  | 0.178  | -0.056 | -0.217 | -0.070 |
| CD532            | -0.637 | -0.267 | 0.326  | 0.074  | -0.528 | -0.574 | -0.561 | 0.281  | 0.143  | -0.012 | -0.027 | 0.033  | 0.081  |
| Lenvatinib       | -0.303 | -0.161 | 0.333  | -0.254 | -0.142 | -0.369 | -0.079 | -0.140 | 0.090  | 0.137  | 0.011  | -0.167 | 0.141  |
| Cabozantinib     | 0.131  | -0.279 | 0.211  | -0.338 | -0.149 | -0.012 | 0.097  | 0.078  | -0.061 | -0.036 | 0.140  | -0.179 | -0.276 |

Table S6 ME matrices for LIMORE

| ArrayName | ME5    | ME6    | ME1    | ME7    | ME3    | ME9    | ME4    | ME8    | ME10   | ME13   | ME12   | ME2    | ME11   |
|-----------|--------|--------|--------|--------|--------|--------|--------|--------|--------|--------|--------|--------|--------|
| CLC10     | -0.070 | 0.037  | -0.013 | -0.072 | 0.119  | 0.113  | -0.103 | -0.005 | 0.035  | 0.012  | -0.030 | -0.088 | -0.010 |
| CLC11     | 0.065  | 0.059  | 0.055  | 0.109  | 0.084  | -0.264 | -0.103 | 0.119  | -0.022 | -0.128 | -0.166 | -0.078 | 0.001  |
| CLC12     | 0.000  | 0.056  | 0.036  | -0.022 | 0.008  | 0.063  | -0.048 | -0.116 | 0.004  | 0.022  | -0.125 | -0.043 | -0.093 |
| CLC13     | 0.065  | 0.084  | 0.115  | 0.067  | -0.237 | -0.059 | 0.005  | 0.018  | -0.139 | -0.055 | 0.054  | -0.035 | -0.014 |
| CLC14     | 0.063  | 0.057  | 0.067  | 0.094  | 0.067  | -0.104 | -0.099 | 0.011  | -0.019 | -0.017 | -0.158 | -0.087 | -0.140 |
| CLC15     | -0.053 | -0.301 | 0.004  | -0.050 | -0.049 | 0.152  | 0.136  | 0.084  | 0.004  | 0.069  | 0.044  | 0.007  | 0.088  |
| CLC16     | 0.018  | 0.040  | 0.078  | 0.037  | 0.045  | -0.001 | -0.167 | -0.055 | -0.157 | 0.051  | -0.009 | -0.065 | -0.095 |
| CLC17     | -0.087 | 0.000  | 0.034  | -0.100 | -0.010 | 0.159  | 0.106  | -0.343 | -0.315 | -0.071 | 0.158  | -0.097 | 0.085  |
| CLC18     | 0.037  | 0.046  | 0.062  | 0.063  | -0.035 | 0.119  | 0.050  | -0.191 | -0.033 | 0.177  | -0.028 | -0.097 | -0.081 |
| CLC19     | -0.019 | -0.110 | 0.008  | -0.056 | -0.177 | -0.064 | 0.194  | -0.025 | -0.064 | -0.146 | 0.020  | 0.075  | 0.140  |
| CLC1      | -0.012 | 0.045  | 0.044  | -0.052 | 0.107  | -0.029 | -0.160 | -0.029 | 0.079  | -0.028 | -0.114 | -0.071 | -0.066 |
| CLC20     | 0.007  | 0.071  | -0.141 | -0.115 | 0.116  | 0.071  | -0.045 | 0.015  | -0.075 | -0.088 | -0.031 | 0.072  | 0.207  |
| CLC21     | -0.018 | 0.038  | 0.023  | -0.025 | 0.111  | -0.151 | -0.053 | 0.050  | -0.037 | -0.138 | -0.152 | -0.095 | -0.073 |
| CLC22     | -0.296 | 0.024  | 0.021  | -0.256 | 0.076  | 0.013  | 0.021  | -0.119 | 0.058  | -0.023 | -0.093 | -0.086 | -0.065 |
| CLC23     | 0.029  | 0.070  | -0.123 | -0.071 | 0.092  | 0.107  | 0.040  | -0.012 | 0.058  | 0.011  | 0.056  | 0.064  | 0.017  |
| CLC24     | -0.058 | 0.016  | 0.026  | -0.072 | 0.026  | -0.119 | 0.123  | 0.060  | -0.281 | -0.121 | 0.008  | -0.091 | -0.016 |
| CLC25     | -0.009 | 0.049  | 0.002  | -0.026 | 0.069  | 0.251  | -0.104 | -0.205 | 0.052  | 0.152  | 0.059  | -0.048 | 0.133  |
| CLC26     | -0.041 | 0.041  | 0.037  | -0.051 | -0.025 | -0.121 | 0.105  | -0.153 | -0.212 | 0.065  | 0.080  | -0.057 | -0.009 |
| CLC27     | 0.008  | 0.036  | 0.050  | 0.059  | 0.065  | 0.235  | -0.030 | -0.109 | -0.254 | -0.027 | -0.061 | -0.114 | -0.100 |
| CLC28     | 0.042  | 0.057  | 0.054  | 0.068  | 0.079  | -0.144 | -0.080 | 0.038  | -0.219 | 0.040  | 0.064  | -0.087 | 0.002  |
| CLC29     | 0.111  | 0.053  | 0.001  | 0.094  | 0.085  | 0.032  | -0.069 | 0.030  | -0.137 | -0.027 | -0.187 | -0.061 | -0.160 |
| CLC2      | 0.018  | 0.044  | 0.024  | 0.026  | 0.028  | 0.158  | 0.033  | -0.027 | -0.027 | 0.013  | -0.129 | -0.069 | 0.036  |
| CLC30     | 0.049  | 0.042  | 0.005  | 0.035  | 0.103  | -0.015 | -0.140 | 0.004  | 0.095  | -0.002 | -0.052 | -0.056 | -0.039 |
| CLC31     | 0.037  | 0.046  | 0.045  | 0.041  | 0.049  | -0.056 | 0.017  | -0.018 | -0.238 | 0.083  | -0.175 | -0.074 | -0.171 |
| CLC32     | -0.728 | -0.220 | 0.053  | -0.340 | 0.092  | -0.098 | -0.140 | -0.004 | -0.009 | -0.100 | -0.058 | -0.036 | 0.076  |
| CLC33     | -0.023 | -0.287 | -0.008 | -0.038 | 0.057  | 0.069  | 0.013  | -0.105 | 0.042  | 0.157  | 0.158  | -0.001 | 0.168  |
| CLC34     | 0.008  | -0.284 | 0.020  | 0.043  | 0.142  | 0.037  | -0.140 | -0.047 | 0.065  | 0.007  | -0.034 | -0.010 | -0.010 |
| CLC35     | 0.005  | -0.252 | -0.054 | -0.028 | 0.108  | 0.059  | 0.018  | -0.009 | -0.052 | 0.093  | -0.017 | 0.025  | -0.041 |
| CLC36     | -0.044 | -0.245 | -0.009 | -0.044 | 0.112  | -0.059 | -0.037 | 0.015  | 0.036  | -0.070 | -0.156 | -0.023 | 0.017  |
| CLC37     | 0.095  | -0.171 | -0.163 | -0.053 | 0.059  | 0.130  | 0.080  | 0.164  | 0.137  | 0.078  | 0.156  | 0.135  | 0.071  |
| CLC38     | -0.022 | -0.231 | -0.033 | -0.088 | -0.064 | 0.098  | 0.164  | 0.223  | 0.021  | -0.108 | -0.075 | 0.051  | -0.058 |
| CLC39     | 0.082  | -0.219 | 0.011  | 0.075  | 0.076  | -0.045 | -0.108 | 0.130  | 0.110  | -0.051 | -0.053 | 0.009  | 0.130  |
| CLC3      | -0.408 | 0.081  | 0.049  | -0.278 | -0.142 | 0.008  | 0.001  | 0.065  | 0.027  | 0.103  | -0.031 | 0.045  | -0.052 |

|         |        |        |        |        |        |        |        |        |        |        |        |        |        |
|---------|--------|--------|--------|--------|--------|--------|--------|--------|--------|--------|--------|--------|--------|
| CLC40   | -0.001 | -0.168 | -0.060 | -0.081 | -0.104 | 0.028  | 0.201  | 0.020  | 0.061  | 0.082  | 0.200  | 0.107  | 0.050  |
| CLC41   | 0.047  | -0.090 | -0.328 | -0.183 | 0.055  | 0.110  | 0.100  | 0.268  | 0.209  | 0.287  | 0.144  | 0.342  | 0.216  |
| CLC42   | 0.035  | -0.089 | -0.115 | -0.035 | -0.105 | 0.242  | 0.148  | 0.084  | 0.154  | 0.021  | 0.267  | 0.239  | 0.083  |
| CLC43   | 0.047  | -0.088 | -0.034 | -0.017 | -0.167 | 0.087  | 0.157  | 0.047  | 0.048  | 0.121  | 0.141  | 0.174  | 0.072  |
| CLC44   | 0.022  | -0.142 | -0.371 | -0.213 | 0.132  | 0.160  | 0.092  | 0.222  | 0.188  | 0.172  | 0.042  | 0.302  | 0.228  |
| CLC45   | 0.039  | -0.134 | -0.229 | -0.164 | 0.007  | 0.044  | 0.192  | 0.109  | 0.067  | 0.243  | 0.135  | 0.192  | 0.211  |
| CLC46   | 0.073  | -0.107 | -0.332 | -0.156 | 0.104  | 0.038  | 0.107  | 0.215  | 0.189  | 0.166  | 0.238  | 0.290  | 0.191  |
| CLC47   | 0.060  | -0.138 | -0.372 | -0.177 | 0.126  | 0.174  | 0.034  | 0.287  | 0.262  | -0.029 | 0.141  | 0.355  | 0.250  |
| CLC48   | -0.029 | -0.173 | -0.055 | -0.066 | 0.128  | -0.127 | -0.019 | 0.094  | 0.050  | 0.001  | -0.124 | 0.054  | 0.038  |
| CLC49   | 0.020  | -0.110 | -0.125 | -0.042 | 0.031  | 0.085  | 0.064  | 0.160  | 0.122  | 0.176  | 0.066  | 0.180  | 0.112  |
| CLC4    | -0.017 | 0.033  | 0.018  | -0.043 | -0.155 | 0.093  | 0.167  | 0.044  | -0.018 | -0.064 | 0.194  | -0.024 | 0.030  |
| CLC50   | 0.049  | -0.093 | -0.343 | -0.200 | 0.006  | 0.075  | 0.144  | 0.154  | 0.275  | 0.225  | 0.211  | 0.324  | 0.325  |
| CLC5    | 0.042  | 0.059  | 0.053  | 0.055  | 0.110  | 0.052  | -0.129 | 0.067  | 0.004  | -0.232 | -0.071 | -0.077 | -0.083 |
| CLC6    | -0.036 | 0.042  | -0.079 | -0.071 | 0.108  | 0.051  | -0.018 | -0.090 | -0.036 | 0.031  | 0.164  | -0.005 | 0.099  |
| CLC7    | 0.000  | 0.086  | 0.063  | 0.026  | -0.070 | 0.010  | 0.083  | -0.117 | 0.041  | 0.005  | -0.049 | -0.088 | -0.046 |
| CLC8    | 0.019  | 0.048  | 0.059  | 0.095  | 0.083  | 0.045  | -0.136 | -0.013 | -0.022 | 0.164  | -0.013 | -0.090 | -0.072 |
| CLC9    | 0.044  | 0.052  | 0.064  | 0.074  | 0.098  | -0.022 | -0.089 | 0.064  | 0.020  | -0.271 | -0.177 | -0.087 | -0.200 |
| Hep3B   | 0.017  | 0.033  | -0.060 | -0.109 | -0.103 | 0.049  | 0.156  | 0.174  | -0.003 | 0.001  | -0.017 | 0.012  | 0.086  |
| HepG2   | 0.039  | 0.103  | 0.023  | 0.034  | -0.265 | -0.183 | 0.148  | 0.006  | 0.020  | -0.034 | 0.167  | 0.079  | 0.092  |
| HLE     | 0.111  | 0.092  | 0.088  | 0.186  | 0.012  | -0.166 | -0.161 | -0.102 | -0.114 | -0.062 | 0.044  | -0.053 | 0.003  |
| HLF     | 0.077  | 0.114  | 0.040  | 0.127  | 0.039  | -0.074 | -0.148 | -0.060 | -0.079 | -0.162 | 0.104  | -0.001 | 0.031  |
| Huh1    | -0.060 | 0.087  | 0.066  | -0.011 | -0.193 | 0.105  | 0.143  | -0.094 | 0.033  | -0.043 | 0.094  | 0.009  | -0.157 |
| Huh6    | 0.029  | 0.057  | 0.094  | 0.071  | -0.164 | -0.204 | 0.125  | -0.081 | -0.075 | 0.036  | -0.017 | -0.082 | -0.089 |
| Huh7    | 0.040  | 0.056  | 0.083  | 0.089  | -0.198 | -0.154 | 0.130  | 0.040  | 0.072  | -0.033 | -0.047 | -0.068 | -0.115 |
| JHH1    | 0.002  | 0.075  | 0.064  | 0.044  | -0.094 | -0.067 | -0.049 | -0.112 | 0.074  | -0.016 | 0.078  | 0.009  | -0.045 |
| JHH2    | -0.082 | 0.049  | -0.052 | -0.093 | 0.083  | -0.103 | -0.039 | 0.125  | -0.001 | 0.121  | 0.148  | 0.027  | 0.063  |
| JHH4    | 0.041  | 0.067  | 0.043  | 0.039  | 0.060  | 0.004  | -0.092 | -0.042 | -0.065 | -0.085 | 0.010  | -0.014 | -0.082 |
| JHH5    | 0.057  | 0.082  | 0.082  | 0.075  | -0.226 | -0.052 | 0.160  | -0.023 | 0.042  | -0.027 | -0.054 | 0.008  | -0.149 |
| JHH6    | 0.065  | 0.078  | 0.059  | 0.175  | 0.071  | -0.097 | -0.138 | -0.031 | 0.106  | 0.092  | -0.107 | -0.046 | -0.178 |
| JHH7    | 0.107  | 0.089  | 0.107  | 0.162  | -0.229 | -0.071 | 0.127  | -0.052 | 0.008  | -0.122 | 0.022  | -0.047 | -0.068 |
| Li7     | -0.040 | 0.019  | 0.042  | -0.035 | -0.016 | -0.068 | 0.034  | -0.107 | 0.025  | 0.050  | -0.099 | -0.082 | -0.092 |
| Mahlavu | -0.026 | 0.096  | 0.047  | 0.066  | 0.019  | -0.054 | -0.125 | -0.022 | 0.103  | 0.075  | 0.037  | -0.032 | -0.041 |
| MHCC97H | -0.087 | 0.038  | 0.000  | -0.112 | -0.061 | 0.166  | 0.056  | -0.062 | 0.062  | 0.123  | 0.116  | 0.011  | -0.033 |
| PLC8024 | -0.022 | 0.086  | 0.087  | 0.065  | -0.229 | -0.018 | 0.118  | -0.031 | -0.053 | -0.042 | 0.018  | -0.022 | -0.009 |
| PLCPRF5 | 0.022  | 0.101  | 0.103  | 0.068  | -0.214 | -0.089 | 0.050  | -0.006 | 0.062  | -0.056 | 0.022  | -0.031 | -0.001 |

|        |        |       |        |       |        |        |        |        |        |        |        |        |        |
|--------|--------|-------|--------|-------|--------|--------|--------|--------|--------|--------|--------|--------|--------|
| SNU182 | -0.036 | 0.060 | 0.058  | 0.028 | -0.009 | -0.168 | -0.131 | -0.032 | 0.011  | 0.078  | -0.065 | 0.000  | 0.085  |
| SNU354 | 0.100  | 0.073 | 0.072  | 0.156 | 0.027  | 0.007  | -0.072 | -0.003 | 0.027  | -0.035 | 0.003  | -0.047 | -0.075 |
| SNU368 | 0.022  | 0.071 | 0.046  | 0.071 | 0.005  | 0.164  | -0.036 | -0.010 | 0.038  | -0.086 | -0.159 | -0.058 | 0.029  |
| SNU387 | -0.051 | 0.032 | 0.065  | 0.050 | 0.108  | -0.177 | -0.157 | -0.088 | -0.039 | -0.320 | -0.008 | -0.113 | -0.030 |
| SNU398 | 0.096  | 0.124 | 0.132  | 0.187 | -0.236 | -0.016 | -0.124 | 0.003  | -0.058 | -0.008 | -0.001 | 0.050  | 0.057  |
| SNU423 | 0.087  | 0.073 | 0.066  | 0.184 | 0.091  | -0.004 | -0.164 | 0.042  | -0.045 | -0.086 | -0.052 | -0.091 | -0.059 |
| SNU449 | 0.087  | 0.085 | 0.103  | 0.194 | 0.043  | -0.078 | -0.151 | -0.176 | 0.010  | 0.036  | -0.175 | -0.097 | -0.148 |
| SNU475 | 0.004  | 0.100 | 0.053  | 0.079 | 0.042  | 0.055  | -0.130 | -0.135 | 0.004  | -0.013 | -0.116 | -0.055 | -0.090 |
| SNU739 | 0.097  | 0.091 | 0.069  | 0.171 | -0.003 | -0.031 | -0.163 | 0.024  | 0.003  | -0.077 | 0.010  | -0.056 | -0.018 |
| SNU761 | 0.030  | 0.042 | 0.075  | 0.104 | 0.066  | -0.074 | -0.021 | 0.061  | -0.004 | -0.184 | -0.103 | -0.144 | -0.158 |
| SNU878 | -0.031 | 0.041 | 0.068  | 0.049 | -0.028 | -0.028 | 0.086  | -0.225 | -0.220 | -0.125 | -0.170 | -0.102 | -0.216 |
| SNU886 | -0.009 | 0.046 | -0.008 | 0.013 | 0.084  | -0.107 | -0.023 | 0.020  | 0.025  | -0.052 | -0.034 | -0.009 | -0.029 |
| Tong   | 0.053  | 0.080 | 0.095  | 0.101 | -0.103 | -0.154 | 0.014  | -0.069 | -0.119 | 0.023  | -0.081 | -0.056 | 0.059  |

Table S7 ME matrices for CCLE

| ArrayName cc | ME1    | ME2    | ME3    | ME4    | ME5    | ME6    | ME7    | ME8    | ME9    | ME10   | ME11   | ME12   | ME13   |
|--------------|--------|--------|--------|--------|--------|--------|--------|--------|--------|--------|--------|--------|--------|
| AlexanderR   | 0.066  | -0.069 | -0.188 | 0.093  | -0.084 | -0.095 | 0.102  | -0.182 | 0.077  | -0.182 | -0.086 | -0.106 | -0.207 |
| C3A          | 0.107  | 0.229  | -0.192 | 0.319  | 0.041  | 0.172  | -0.144 | 0.068  | -0.175 | 0.020  | 0.227  | 0.180  | -0.034 |
| Hep 3B2.1.7  | 0.085  | -0.176 | -0.239 | 0.174  | -0.054 | -0.253 | -0.066 | 0.159  | 0.153  | -0.080 | -0.030 | -0.165 | -0.205 |
| HepG2        | 0.142  | 0.288  | -0.227 | 0.348  | 0.077  | 0.258  | -0.197 | 0.197  | -0.129 | 0.149  | 0.295  | 0.263  | 0.086  |
| HLE          | 0.180  | -0.033 | 0.105  | -0.202 | 0.151  | 0.027  | 0.424  | -0.148 | -0.244 | -0.230 | 0.048  | 0.154  | -0.089 |
| HLF          | 0.154  | 0.132  | 0.258  | -0.177 | 0.261  | 0.272  | 0.367  | 0.068  | 0.030  | -0.047 | 0.196  | 0.294  | -0.148 |
| huH.1        | 0.035  | 0.161  | -0.153 | 0.159  | -0.014 | 0.121  | -0.207 | 0.012  | 0.487  | 0.225  | -0.087 | 0.232  | 0.089  |
| HuH.6        | 0.194  | 0.051  | -0.213 | 0.112  | 0.141  | 0.036  | 0.141  | -0.126 | 0.145  | -0.078 | 0.016  | -0.122 | 0.277  |
| HuH.7        | 0.182  | -0.014 | -0.223 | 0.217  | 0.153  | 0.179  | 0.045  | 0.197  | -0.080 | 0.224  | -0.100 | -0.046 | 0.042  |
| JHH.1        | -0.188 | 0.120  | -0.054 | -0.033 | -0.157 | -0.106 | -0.287 | -0.145 | -0.006 | 0.331  | 0.050  | 0.211  | 0.074  |
| JHH.2        | -0.411 | -0.081 | 0.369  | -0.143 | -0.350 | -0.009 | -0.337 | 0.366  | -0.005 | -0.069 | 0.204  | 0.193  | 0.215  |
| JHH.4        | -0.021 | -0.002 | 0.161  | -0.160 | 0.090  | -0.025 | 0.026  | -0.032 | 0.045  | -0.152 | -0.031 | -0.018 | -0.127 |
| JHH.5        | 0.163  | 0.266  | -0.246 | 0.323  | 0.136  | 0.114  | -0.068 | 0.131  | 0.145  | 0.243  | -0.088 | 0.042  | 0.135  |
| JHH.6        | -0.242 | -0.398 | 0.093  | -0.261 | -0.446 | -0.489 | 0.053  | -0.325 | -0.394 | -0.094 | -0.412 | -0.409 | -0.011 |
| JHH.7        | 0.147  | 0.134  | -0.264 | 0.252  | 0.211  | 0.101  | 0.104  | -0.022 | -0.062 | 0.153  | 0.051  | 0.190  | -0.113 |
| Li.7         | 0.032  | -0.093 | -0.031 | 0.112  | 0.105  | -0.059 | 0.085  | -0.178 | -0.003 | 0.045  | -0.161 | -0.170 | 0.111  |
| PLC.PRF.5    | 0.032  | 0.126  | -0.119 | 0.106  | 0.013  | 0.068  | 0.013  | -0.021 | 0.143  | -0.092 | 0.079  | 0.057  | 0.072  |
| SK.HEP.1     | -0.012 | -0.219 | 0.098  | -0.236 | -0.155 | -0.174 | 0.131  | -0.262 | -0.286 | -0.381 | -0.228 | -0.201 | -0.264 |
| SNU.182      | -0.048 | 0.040  | 0.126  | -0.160 | -0.023 | 0.089  | -0.141 | 0.130  | -0.083 | 0.111  | 0.310  | -0.076 | 0.270  |
| SNU.387      | -0.145 | -0.115 | 0.325  | -0.217 | 0.058  | -0.006 | 0.047  | -0.006 | -0.046 | -0.123 | 0.080  | 0.148  | -0.236 |
| SNU.398      | 0.480  | 0.470  | -0.134 | -0.028 | 0.347  | 0.406  | 0.292  | 0.355  | 0.324  | 0.128  | 0.411  | 0.211  | 0.449  |
| SNU.423      | -0.052 | -0.009 | 0.274  | -0.245 | 0.202  | 0.086  | 0.176  | 0.271  | -0.222 | 0.275  | 0.064  | 0.073  | -0.115 |
| SNU.449      | -0.251 | -0.094 | 0.083  | -0.198 | -0.055 | -0.159 | -0.111 | -0.134 | -0.070 | 0.139  | -0.103 | -0.172 | 0.265  |
| SNU.475      | -0.036 | -0.106 | 0.223  | -0.207 | 0.006  | 0.039  | 0.024  | -0.089 | 0.371  | -0.031 | -0.110 | -0.230 | 0.067  |
| SNU.761      | -0.394 | -0.312 | 0.152  | 0.003  | -0.407 | -0.223 | -0.386 | 0.137  | -0.052 | 0.017  | -0.220 | -0.176 | -0.257 |
| SNU.878      | -0.198 | -0.296 | 0.014  | 0.048  | -0.248 | -0.372 | -0.087 | -0.419 | -0.066 | -0.500 | -0.373 | -0.359 | -0.346 |

Table S8 ME matrices for LCCL

| ArrayName | ME1    | ME2    | ME3    | ME4    | ME5    | ME6    | ME7    | ME8    | ME9    | ME10   | ME11   | ME12   | ME13   |
|-----------|--------|--------|--------|--------|--------|--------|--------|--------|--------|--------|--------|--------|--------|
| HepG2     | 0.227  | 0.154  | -0.294 | 0.228  | 0.103  | 0.279  | 0.064  | -0.054 | -0.252 | 0.013  | 0.236  | 0.148  | -0.097 |
| Hep3B     | 0.179  | 0.044  | -0.239 | 0.220  | 0.068  | 0.077  | -0.046 | 0.293  | 0.226  | -0.096 | 0.169  | -0.064 | -0.017 |
| HepaRG    | -0.241 | -0.118 | 0.177  | 0.000  | -0.255 | -0.118 | -0.251 | -0.079 | -0.095 | -0.019 | -0.007 | -0.119 | -0.110 |
| B1        | -0.083 | 0.070  | -0.142 | 0.183  | 0.024  | -0.143 | -0.078 | -0.065 | -0.033 | 0.062  | 0.070  | 0.069  | -0.092 |
| HCC.1.2   | -0.105 | 0.043  | -0.037 | 0.203  | 0.010  | -0.121 | -0.096 | 0.159  | 0.090  | 0.071  | 0.075  | 0.086  | -0.146 |
| HCC.3     | -0.050 | 0.422  | -0.184 | 0.217  | 0.042  | 0.151  | -0.044 | -0.040 | 0.017  | -0.126 | -0.045 | 0.107  | 0.334  |
| HCC.1.1   | -0.196 | 0.048  | 0.210  | -0.193 | 0.123  | -0.036 | 0.022  | 0.113  | -0.174 | 0.071  | -0.052 | -0.011 | 0.152  |
| SNU182    | 0.122  | -0.103 | 0.060  | -0.181 | -0.064 | 0.045  | 0.019  | -0.108 | -0.184 | -0.038 | 0.335  | -0.200 | 0.103  |
| SNU387    | -0.023 | -0.282 | 0.212  | -0.214 | -0.010 | -0.042 | 0.097  | -0.249 | -0.185 | -0.198 | -0.011 | -0.089 | -0.289 |
| SNU398    | 0.315  | 0.244  | -0.212 | -0.117 | 0.108  | 0.473  | 0.168  | 0.139  | 0.097  | -0.194 | 0.324  | 0.026  | 0.159  |
| SNU423    | 0.044  | -0.093 | 0.198  | -0.229 | 0.120  | 0.011  | 0.190  | 0.099  | -0.332 | 0.205  | -0.028 | -0.030 | -0.250 |
| SNU449    | 0.027  | -0.049 | 0.107  | -0.169 | 0.111  | 0.051  | 0.130  | -0.075 | -0.010 | 0.170  | -0.089 | -0.096 | 0.213  |
| SNU475    | 0.036  | -0.249 | 0.129  | -0.152 | -0.113 | -0.138 | 0.039  | -0.364 | 0.152  | -0.126 | -0.259 | -0.372 | -0.102 |
| Huh7      | 0.280  | 0.147  | -0.326 | 0.235  | 0.157  | 0.375  | 0.137  | 0.141  | -0.091 | -0.150 | 0.003  | 0.117  | -0.076 |
| Mahlavu   | 0.034  | 0.234  | 0.054  | -0.195 | 0.130  | 0.125  | 0.129  | 0.144  | 0.118  | 0.426  | 0.034  | 0.214  | 0.410  |
| PLC.PRF5  | 0.006  | 0.119  | -0.180 | 0.165  | -0.009 | -0.062 | 0.010  | -0.046 | 0.078  | -0.072 | 0.041  | 0.024  | -0.094 |
| HLE       | 0.017  | 0.163  | 0.105  | -0.209 | 0.220  | 0.138  | 0.173  | 0.010  | -0.138 | -0.053 | 0.247  | 0.208  | 0.047  |
| HLF       | 0.182  | 0.088  | 0.113  | -0.218 | 0.176  | 0.218  | 0.262  | -0.057 | -0.090 | -0.191 | 0.153  | 0.187  | -0.227 |
| Huh6      | -0.036 | 0.075  | -0.123 | 0.235  | 0.038  | 0.026  | -0.081 | 0.047  | -0.195 | 0.029  | 0.008  | 0.129  | 0.198  |
| Li7       | -0.077 | -0.110 | -0.025 | 0.090  | 0.066  | -0.140 | 0.002  | -0.123 | -0.026 | 0.087  | -0.200 | -0.103 | 0.056  |
| Huh1      | -0.052 | 0.177  | -0.181 | 0.217  | -0.112 | -0.004 | -0.142 | 0.023  | 0.353  | 0.168  | -0.166 | 0.246  | 0.029  |
| JHH1      | 0.018  | 0.035  | -0.065 | -0.026 | -0.193 | -0.022 | -0.210 | -0.192 | 0.025  | 0.099  | -0.005 | 0.111  | 0.011  |
| JHH2      | -0.523 | -0.055 | 0.250  | -0.099 | -0.215 | -0.278 | -0.269 | 0.309  | -0.066 | -0.059 | 0.241  | 0.263  | 0.186  |
| JHH4      | 0.115  | -0.075 | 0.124  | -0.129 | 0.141  | 0.075  | 0.148  | -0.107 | 0.014  | -0.148 | -0.153 | -0.035 | -0.155 |
| JHH5      | 0.260  | 0.140  | -0.311 | 0.244  | 0.124  | 0.124  | 0.107  | -0.012 | 0.010  | 0.103  | -0.217 | -0.034 | 0.014  |
| JHH6      | 0.060  | 0.017  | 0.135  | -0.155 | 0.138  | 0.085  | 0.225  | -0.004 | -0.181 | 0.239  | -0.242 | -0.095 | 0.244  |
| JHH7      | 0.037  | 0.141  | -0.221 | 0.225  | -0.111 | 0.033  | -0.222 | 0.131  | -0.037 | 0.113  | 0.099  | 0.182  | -0.040 |
| SNU354    | 0.093  | -0.175 | 0.055  | -0.001 | -0.052 | -0.101 | 0.017  | 0.037  | 0.033  | -0.306 | -0.204 | -0.174 | -0.005 |
| SNU368    | 0.044  | -0.275 | 0.058  | -0.046 | -0.044 | -0.120 | 0.070  | -0.094 | 0.358  | 0.003  | 0.108  | -0.337 | -0.230 |
| SNU739    | -0.025 | 0.015  | 0.083  | -0.188 | 0.114  | -0.058 | 0.082  | 0.155  | 0.099  | 0.073  | 0.119  | 0.102  | -0.016 |
| SNU761    | -0.378 | -0.101 | 0.234  | -0.062 | -0.718 | -0.302 | -0.605 | 0.433  | 0.127  | 0.242  | 0.005  | 0.013  | -0.041 |
| SNU878    | -0.091 | -0.337 | 0.035  | 0.115  | -0.143 | -0.217 | -0.053 | -0.400 | 0.057  | -0.446 | -0.409 | -0.340 | -0.237 |
| SNU886    | -0.026 | -0.306 | 0.190  | -0.054 | 0.052  | -0.202 | 0.125  | -0.069 | -0.181 | -0.115 | -0.137 | -0.298 | -0.144 |



|         |        |        |       |       |        |        |        |        |       |       |        |       |       |
|---------|--------|--------|-------|-------|--------|--------|--------|--------|-------|-------|--------|-------|-------|
| MHCC97H | -0.189 | -0.050 | 0.010 | 0.062 | -0.028 | -0.181 | -0.121 | -0.096 | 0.419 | 0.160 | -0.042 | 0.167 | 0.213 |
|---------|--------|--------|-------|-------|--------|--------|--------|--------|-------|-------|--------|-------|-------|
